# Supplementary material for: Genomic Profiling of the Steroidogenic Acute Regulatory Protein in Breast Cancer: In Silico Assessments and a Mechanistic Perspective
Source: Cancers (Basel). 2019 May 4;11(5):623. doi: 10.3390/cancers11050623 (PMC6562549; doi:10.3390/cancers11050623)
Supplement: Supplementary file 1 [file cancers-11-00623-s001.zip › cancers-498220-supplement/cancers-498220-supplementary excel file.xls]

## Sheet: Meta w.out MX-Overall-03-29-19
sample	sample	Star (fkpm+uq+1)	American Joint Committee on Cancer Metastasis Stage Code	M0=1; M1=2; MX=3	Patient's Vital Status	Overall Survival (Months)	Alive=0; Dead=1
TCGA-BH-A0AZ-01A	TCGA-BH-A0AZ-01A	9.66	cM0 (i+)	1	Alive	63.04	0
TCGA-BH-A18I-01A	TCGA-BH-A18I-01A	12.64	cM0 (i+)	1	Alive	35.91	0
TCGA-BH-A5IZ-01A	TCGA-BH-A5IZ-01A	11.72	cM0 (i+)	1	Alive	18.63	0
TCGA-S3-AA14-01A	TCGA-S3-AA14-01A	10.45	cM0 (i+)	1	Alive	17.38	0
TCGA-S3-AA15-01A	TCGA-S3-AA15-01A	13.32	cM0 (i+)	1	Alive	17.25	0
TCGA-S3-AA17-01A	TCGA-S3-AA17-01A	11.32	cM0 (i+)	1	Alive	13.93	0
TCGA-3C-AALI-01A	TCGA-3C-AALI-01A	11.04	M0	1	Alive	131.57	0
TCGA-3C-AALJ-01A	TCGA-3C-AALJ-01A	12.36	M0	1	Alive	48.42	0
TCGA-3C-AALK-01A	TCGA-3C-AALK-01A	10.43	M0	1	Alive	47.57	0
TCGA-4H-AAAK-01A	TCGA-4H-AAAK-01A	8.495	M0	1	Alive	11.43	0
TCGA-5L-AAT0-01A	TCGA-5L-AAT0-01A	10.17	M0	1	Alive	48.52	0
TCGA-A1-A0SB-01A	TCGA-A1-A0SB-01A	10.83	M0	1	Alive	8.51	0
TCGA-A1-A0SD-01A	TCGA-A1-A0SD-01A	8.833	M0	1	Alive	14.36	0
TCGA-A1-A0SE-01A	TCGA-A1-A0SE-01A	9.095	M0	1	Alive	43.4	0
TCGA-A1-A0SF-01A	TCGA-A1-A0SF-01A	11.2	M0	1	Alive	48.06	0
TCGA-A1-A0SG-01A	TCGA-A1-A0SG-01A	12.43	M0	1	Alive	14.26	0
TCGA-A1-A0SH-01A	TCGA-A1-A0SH-01A	9.275	M0	1	Alive	47.21	0
TCGA-A1-A0SI-01A	TCGA-A1-A0SI-01A	9.799	M0	1	Alive	20.86	0
TCGA-A1-A0SJ-01A	TCGA-A1-A0SJ-01A	9.006	M0	1	Alive	13.67	0
TCGA-A1-A0SK-01A	TCGA-A1-A0SK-01A	12.23	M0	1	Dead	31.77	1
TCGA-A1-A0SM-01A	TCGA-A1-A0SM-01A	8.455	M0	1	Alive	7.95	0
TCGA-A1-A0SO-01A	TCGA-A1-A0SO-01A	8.607	M0	1	Alive	27.99	0
TCGA-A1-A0SP-01A	TCGA-A1-A0SP-01A	15.03	M0	1	Alive	19.19	0
TCGA-A2-A04N-01A	TCGA-A2-A04N-01A	11.74	M0	1	Alive	143.04	0
TCGA-A2-A04P-01A	TCGA-A2-A04P-01A	10.98	M0	1	Dead	18	1
TCGA-A2-A04Q-01A	TCGA-A2-A04Q-01A	12.4	M0	1	Alive	78.35	0
TCGA-A2-A04R-01A	TCGA-A2-A04R-01A	0	M0	1	Alive	121.85	0
TCGA-A2-A04T-01A	TCGA-A2-A04T-01A	13.24	M0	1	Alive	73.78	0
TCGA-A2-A04U-01A	TCGA-A2-A04U-01A	12.27	M0	1	Alive	87.19	0
TCGA-A2-A04V-01A	TCGA-A2-A04V-01A	10.52	M0	1	Dead	63.07	1
TCGA-A2-A04W-01A	TCGA-A2-A04W-01A	8.881	M0	1	Alive	101.91	0
TCGA-A2-A04X-01A	TCGA-A2-A04X-01A	10.18	M0	1	Alive	55.39	0
TCGA-A2-A04Y-01A	TCGA-A2-A04Y-01A	8.716	M0	1	Alive	36.1	0
TCGA-A2-A0CK-01A	TCGA-A2-A0CK-01A	7.773	M0	1	Alive	136.63	0
TCGA-A2-A0CL-01A	TCGA-A2-A0CL-01A	10.86	M0	1	Alive	99.05	0
TCGA-A2-A0CM-01A	TCGA-A2-A0CM-01A	13.31	M0	1	Dead	24.77	1
TCGA-A2-A0CO-01A	TCGA-A2-A0CO-01A	11.98	M0	1	Dead	114.72	1
TCGA-A2-A0CP-01A	TCGA-A2-A0CP-01A	10.12	M0	1	Alive	92.41	0
TCGA-A2-A0CQ-01A	TCGA-A2-A0CQ-01A	11.2	M0	1	Alive	88.53	0
TCGA-A2-A0CR-01A	TCGA-A2-A0CR-01A	12.5	M0	1	Alive	107.85	0
TCGA-A2-A0CT-01A	TCGA-A2-A0CT-01A	9.49	M0	1	Alive	75.2	0
TCGA-A2-A0CU-01A	TCGA-A2-A0CU-01A	11.14	M0	1	Dead	5.19	1
TCGA-A2-A0CV-01A	TCGA-A2-A0CV-01A	13.1	M0	1	Alive	98.92	0
TCGA-A2-A0CW-01A	TCGA-A2-A0CW-01A	9.143	M0	1	Alive	107.85	0
TCGA-A2-A0CX-01A	TCGA-A2-A0CX-01A	10.14	M0	1	Alive	56.77	0
TCGA-A2-A0CY-01A	TCGA-A2-A0CY-01A	9.423	M0	1	Alive	54.96	0
TCGA-A2-A0CZ-01A	TCGA-A2-A0CZ-01A	11.35	M0	1	Alive	53.09	0
TCGA-A2-A0D0-01A	TCGA-A2-A0D0-01A	7.938	M0	1	Alive	67.28	0
TCGA-A2-A0D1-01A	TCGA-A2-A0D1-01A	11.82	M0	1	Alive	34.53	0
TCGA-A2-A0D2-01A	TCGA-A2-A0D2-01A	11.16	M0	1	Alive	33.74	0
TCGA-A2-A0D3-01A	TCGA-A2-A0D3-01A	10.9	M0	1	Alive	61.53	0
TCGA-A2-A0D4-01A	TCGA-A2-A0D4-01A	9.003	M0	1	Alive	25.2	0
TCGA-A2-A0EM-01A	TCGA-A2-A0EM-01A	9.645	M0	1	Alive	101.64	0
TCGA-A2-A0EN-01A	TCGA-A2-A0EN-01A	11.18	M0	1	Alive	134.3	0
TCGA-A2-A0EO-01A	TCGA-A2-A0EO-01A	9.808	M0	1	Alive	80.22	0
TCGA-A2-A0EP-01A	TCGA-A2-A0EP-01A	12.96	M0	1	Alive	118.36	0
TCGA-A2-A0EQ-01A	TCGA-A2-A0EQ-01A	13.79	M0	1	Alive	79.7	0
TCGA-A2-A0ER-01A	TCGA-A2-A0ER-01A	10.65	M0	1	Alive	74.34	0
TCGA-A2-A0ES-01A	TCGA-A2-A0ES-01A	11.89	M0	1	Alive	71.94	0
TCGA-A2-A0ET-01A	TCGA-A2-A0ET-01A	7.871	M0	1	Alive	35.02	0
TCGA-A2-A0EU-01A	TCGA-A2-A0EU-01A	10.74	M0	1	Alive	34.26	0
TCGA-A2-A0EV-01A	TCGA-A2-A0EV-01A	8.916	M0	1	Alive	31.8	0
TCGA-A2-A0EW-01A	TCGA-A2-A0EW-01A	11.02	M0	1	Dead	61.89	1
TCGA-A2-A0EX-01A	TCGA-A2-A0EX-01A	9.285	M0	1	Alive	24.7	0
TCGA-A2-A0EY-01A	TCGA-A2-A0EY-01A	11.26	M0	1	Alive	63.24	0
TCGA-A2-A0ST-01A	TCGA-A2-A0ST-01A	13.31	M0	1	Alive	99.11	0
TCGA-A2-A0SU-01A	TCGA-A2-A0SU-01A	9.532	M0	1	Alive	54.6	0
TCGA-A2-A0SX-01A	TCGA-A2-A0SX-01A	10.22	M0	1	Alive	50.39	0
TCGA-A2-A0SY-01A	TCGA-A2-A0SY-01A	10.41	M0	1	Alive	44.25	0
TCGA-A2-A0T0-01A	TCGA-A2-A0T0-01A	6.558	M0	1	Alive	17.51	0
TCGA-A2-A0T1-01A	TCGA-A2-A0T1-01A	10.72	M0	1	Alive	17.12	0
TCGA-A2-A0T3-01A	TCGA-A2-A0T3-01A	11.33	M0	1	Alive	49.8	0
TCGA-A2-A0T4-01A	TCGA-A2-A0T4-01A	9.086	M0	1	Alive	20.5	0
TCGA-A2-A0T5-01A	TCGA-A2-A0T5-01A	12.3	M0	1	Alive	17.44	0
TCGA-A2-A0T6-01A	TCGA-A2-A0T6-01A	10.63	M0	1	Alive	18.89	0
TCGA-A2-A0T7-01A	TCGA-A2-A0T7-01A	11.37	M0	1	Alive	20.73	0
TCGA-A2-A0YC-01A	TCGA-A2-A0YC-01A	9.107	M0	1	Alive	32.52	0
TCGA-A2-A0YD-01A	TCGA-A2-A0YD-01A	9.279	M0	1	Alive	25.26	0
TCGA-A2-A0YE-01A	TCGA-A2-A0YE-01A	7.487	M0	1	Alive	18.2	0
TCGA-A2-A0YF-01A	TCGA-A2-A0YF-01A	10.87	M0	1	Alive	50.43	0
TCGA-A2-A0YG-01A	TCGA-A2-A0YG-01A	9.851	M0	1	Alive	21.88	0
TCGA-A2-A0YH-01A	TCGA-A2-A0YH-01A	10.77	M0	1	Alive	21.65	0
TCGA-A2-A0YI-01A	TCGA-A2-A0YI-01A	9.797	M0	1	Alive	49.44	0
TCGA-A2-A0YJ-01A	TCGA-A2-A0YJ-01A	0	M0	1	Alive	18.59	0
TCGA-A2-A0YK-01A	TCGA-A2-A0YK-01A	12.73	M0	1	Alive	19.32	0
TCGA-A2-A0YL-01A	TCGA-A2-A0YL-01A	8.789	M0	1	Alive	48.42	0
TCGA-A2-A0YM-01A	TCGA-A2-A0YM-01A	15.48	M0	1	Alive	31.7	0
TCGA-A2-A0YT-01A	TCGA-A2-A0YT-01A	9.585	M0	1	Dead	23.75	1
TCGA-A2-A1FV-01A	TCGA-A2-A1FV-01A	11.37	M0	1	Alive	23.46	0
TCGA-A2-A1FW-01A	TCGA-A2-A1FW-01A	8.923	M0	1	Alive	17.35	0
TCGA-A2-A1FX-01A	TCGA-A2-A1FX-01A	8.469	M0	1	Alive	60.68	0
TCGA-A2-A1FZ-01A	TCGA-A2-A1FZ-01A	6.812	M0	1	Alive	22.44	0
TCGA-A2-A1G0-01A	TCGA-A2-A1G0-01A	10.46	M0	1	Alive	20.24	0
TCGA-A2-A1G1-01A	TCGA-A2-A1G1-01A	13.62	M0	1	Alive	19.19	0
TCGA-A2-A1G4-01A	TCGA-A2-A1G4-01A	10.95	M0	1	Alive	19.55	0
TCGA-A2-A1G6-01A	TCGA-A2-A1G6-01A	9.81	M0	1	Alive	16.46	0
TCGA-A2-A259-01A	TCGA-A2-A259-01A	11.36	M0	1	Alive	52.43	0
TCGA-A2-A25A-01A	TCGA-A2-A25A-01A	10.87	M0	1	Alive	107.62	0
TCGA-A2-A25B-01A	TCGA-A2-A25B-01A	7.571	M0	1	Alive	42.41	0
TCGA-A2-A25C-01A	TCGA-A2-A25C-01A	8.451	M0	1	Alive	17.18	0
TCGA-A2-A25D-01A	TCGA-A2-A25D-01A	9.31	M0	1	Alive	18.13	0
TCGA-A2-A25E-01A	TCGA-A2-A25E-01A	9.738	M0	1	Alive	105.26	0
TCGA-A2-A25F-01A	TCGA-A2-A25F-01A	13.19	M0	1	Alive	10.58	0
TCGA-A2-A3KC-01A	TCGA-A2-A3KC-01A	7.598	M0	1	Alive	36.2	0
TCGA-A2-A3KD-01A	TCGA-A2-A3KD-01A	9.376	M0	1	Alive	39.62	0
TCGA-A2-A3XS-01A	TCGA-A2-A3XS-01A	10.07	M0	1	Dead	33.9	1
TCGA-A2-A3XT-01A	TCGA-A2-A3XT-01A	12.12	M0	1	Alive	91	0
TCGA-A2-A3XU-01A	TCGA-A2-A3XU-01A	8.944	M0	1	Dead	29.96	1
TCGA-A2-A3XV-01A	TCGA-A2-A3XV-01A	8.135	M0	1	Alive	32.72	0
TCGA-A2-A3XW-01A	TCGA-A2-A3XW-01A	15.2	M0	1	Alive	56.24	0
TCGA-A2-A3XX-01A	TCGA-A2-A3XX-01A	8.593	M0	1	Dead	47.27	1
TCGA-A2-A3XY-01A	TCGA-A2-A3XY-01A	10.91	M0	1	Dead	35.91	1
TCGA-A2-A3XZ-01A	TCGA-A2-A3XZ-01A	11.17	M0	1	Alive	50.33	0
TCGA-A2-A3Y0-01A	TCGA-A2-A3Y0-01A	13.25	M0	1	Alive	50.79	0
TCGA-A2-A4RW-01A	TCGA-A2-A4RW-01A	10.81	M0	1	Alive	7.29	0
TCGA-A2-A4RX-01A	TCGA-A2-A4RX-01A	11.42	M0	1	Alive	24.38	0
TCGA-A2-A4RY-01A	TCGA-A2-A4RY-01A	12.66	M0	1	Alive	21.29	0
TCGA-A2-A4S0-01A	TCGA-A2-A4S0-01A	8.231	M0	1	Alive	23.19	0
TCGA-A2-A4S1-01A	TCGA-A2-A4S1-01A	7.962	M0	1	Alive	26.94	0
TCGA-A2-A4S2-01A	TCGA-A2-A4S2-01A	11.08	M0	1	Alive	21.12	0
TCGA-A2-A4S3-01A	TCGA-A2-A4S3-01A	10.03	M0	1	Alive	21.88	0
TCGA-A7-A0CD-01A	TCGA-A7-A0CD-01A	8.919	M0	1	Alive	38.27	0
TCGA-A7-A0CE-01A	TCGA-A7-A0CE-01A	11	M0	1	Alive	35.28	0
TCGA-A7-A0CG-01A	TCGA-A7-A0CG-01A	10.32	M0	1	Alive	34.26	0
TCGA-A7-A0CH-01A	TCGA-A7-A0CH-01A	6.915	M0	1	Alive	35.45	0
TCGA-A7-A0CJ-01A	TCGA-A7-A0CJ-01A	10.73	M0	1	Alive	30.58	0
TCGA-A7-A0D9-01A	TCGA-A7-A0D9-01A	13.09	M0	1	Alive	37.42	0
TCGA-A7-A0DA-01A	TCGA-A7-A0DA-01A	9.125	M0	1	Alive	35.64	0
TCGA-A7-A0DB-01A	TCGA-A7-A0DB-01A	11.83	M0	1	Alive	33.08	0
TCGA-A7-A0DC-01A	TCGA-A7-A0DC-01A	12.69	M0	1	Alive	29.76	0
TCGA-A7-A13D-01A	TCGA-A7-A13D-01A	9.432	M0	1	Alive	31.7	0
TCGA-A7-A13F-01A	TCGA-A7-A13F-01A	10.28	M0	1	Alive	25.13	0
TCGA-A7-A26F-01B	TCGA-A7-A26F-01B	13.24	M0	1	Alive	24.24	0
TCGA-A7-A26G-01A	TCGA-A7-A26G-01A	8.492	M0	1	Alive	23.72	0
TCGA-A7-A26H-01A	TCGA-A7-A26H-01A	9.796	M0	1	Alive	23.78	0
TCGA-A7-A26I-01B	TCGA-A7-A26I-01B	14.01	M0	1	Alive	21.71	0
TCGA-A7-A26J-01A	TCGA-A7-A26J-01A	10.27	M0	1	Alive	20.6	0
TCGA-A7-A3IY-01A	TCGA-A7-A3IY-01A	9.594	M0	1	Alive	11.33	0
TCGA-A7-A3IZ-01A	TCGA-A7-A3IZ-01A	11.43	M0	1	Alive	10.58	0
TCGA-A7-A3J0-01A	TCGA-A7-A3J0-01A	7.775	M0	1	Alive	10.28	0
TCGA-A7-A3RF-01A	TCGA-A7-A3RF-01A	9.555	M0	1	Alive	13.4	0
TCGA-A7-A4SA-01A	TCGA-A7-A4SA-01A	11.13	M0	1	Alive	14.91	0
TCGA-A7-A4SB-01A	TCGA-A7-A4SB-01A	9.606	M0	1	Alive	13.73	0
TCGA-A7-A4SD-01A	TCGA-A7-A4SD-01A	13.55	M0	1	Alive	14.49	0
TCGA-A7-A4SE-01A	TCGA-A7-A4SE-01A	8.902	M0	1	Alive	21.16	0
TCGA-A7-A4SF-01A	TCGA-A7-A4SF-01A	7.341	M0	1	Alive	17.9	0
TCGA-A7-A56D-01A	TCGA-A7-A56D-01A	8.763	M0	1	Alive	14.72	0
TCGA-A7-A5ZV-01A	TCGA-A7-A5ZV-01A	11	M0	1	Alive	12.09	0
TCGA-A7-A5ZW-01A	TCGA-A7-A5ZW-01A	10.99	M0	1	Alive	10.71	0
TCGA-A7-A5ZX-01A	TCGA-A7-A5ZX-01A	10.92	M0	1	Alive	11.04	0
TCGA-A7-A6VV-01A	TCGA-A7-A6VV-01A	10.02	M0	1	Alive	10.28	0
TCGA-A7-A6VW-01A	TCGA-A7-A6VW-01A	12.21	M0	1	Alive	9.36	0
TCGA-A7-A6VX-01A	TCGA-A7-A6VX-01A	11.42	M0	1	Alive	10.41	0
TCGA-A7-A6VY-01A	TCGA-A7-A6VY-01A	8.9	M0	1	Alive	8.74	0
TCGA-A8-A06N-01A	TCGA-A8-A06N-01A	9.534	M0	1	Alive	0	0
TCGA-A8-A06O-01A	TCGA-A8-A06O-01A	10.66	M0	1	Alive	13.01	0
TCGA-A8-A06P-01A	TCGA-A8-A06P-01A	9.99	M0	1	Alive	13.01	0
TCGA-A8-A06Q-01A	TCGA-A8-A06Q-01A	9.177	M0	1	Alive	1.02	0
TCGA-A8-A06R-01A	TCGA-A8-A06R-01A	0	M0	1	Alive	17.97	0
TCGA-A8-A06T-01A	TCGA-A8-A06T-01A	10.27	M0	1	Alive	53.02	0
TCGA-A8-A06U-01A	TCGA-A8-A06U-01A	9.584	M0	1	Dead	29.01	1
TCGA-A8-A06X-01A	TCGA-A8-A06X-01A	8.771	M0	1	Dead	30.98	1
TCGA-A8-A06Y-01A	TCGA-A8-A06Y-01A	6.892	M0	1	Alive	25.99	0
TCGA-A8-A06Z-01A	TCGA-A8-A06Z-01A	8.13	M0	1	Alive	1.02	0
TCGA-A8-A075-01A	TCGA-A8-A075-01A	8.989	M0	1	Alive	17.02	0
TCGA-A8-A076-01A	TCGA-A8-A076-01A	10.8	M0	1	Alive	53.94	0
TCGA-A8-A079-01A	TCGA-A8-A079-01A	8.179	M0	1	Alive	9	0
TCGA-A8-A07B-01A	TCGA-A8-A07B-01A	0	M0	1	Alive	42.97	0
TCGA-A8-A07C-01A	TCGA-A8-A07C-01A	9.551	M0	1	Alive	33.97	0
TCGA-A8-A07F-01A	TCGA-A8-A07F-01A	8.535	M0	1	Alive	18.96	0
TCGA-A8-A07G-01A	TCGA-A8-A07G-01A	10.43	M0	1	Alive	18.96	0
TCGA-A8-A07I-01A	TCGA-A8-A07I-01A	10.68	M0	1	Alive	13.99	0
TCGA-A8-A07J-01A	TCGA-A8-A07J-01A	8.025	M0	1	Alive	11.99	0
TCGA-A8-A07L-01A	TCGA-A8-A07L-01A	11.68	M0	1	Alive	32.03	0
TCGA-A8-A07O-01A	TCGA-A8-A07O-01A	12.85	M0	1	Alive	9.99	0
TCGA-A8-A07P-01A	TCGA-A8-A07P-01A	8.196	M0	1	Alive	10.97	0
TCGA-A8-A07R-01A	TCGA-A8-A07R-01A	8.411	M0	1	Alive	8.97	0
TCGA-A8-A07S-01A	TCGA-A8-A07S-01A	8.155	M0	1	Alive	7.98	0
TCGA-A8-A07U-01A	TCGA-A8-A07U-01A	13.2	M0	1	Alive	24.97	0
TCGA-A8-A07Z-01A	TCGA-A8-A07Z-01A	9.763	M0	1	Alive	45.04	0
TCGA-A8-A081-01A	TCGA-A8-A081-01A	13.4	M0	1	Alive	0	0
TCGA-A8-A082-01A	TCGA-A8-A082-01A	12.51	M0	1	Alive	18.04	0
TCGA-A8-A083-01A	TCGA-A8-A083-01A	10.81	M0	1	Alive	0	0
TCGA-A8-A084-01A	TCGA-A8-A084-01A	10.56	M0	1	Alive	15.05	0
TCGA-A8-A085-01A	TCGA-A8-A085-01A	8.34	M0	1	Alive	36.93	0
TCGA-A8-A086-01A	TCGA-A8-A086-01A	11.21	M0	1	Alive	13.01	0
TCGA-A8-A08A-01A	TCGA-A8-A08A-01A	7.664	M0	1	Alive	0.99	0
TCGA-A8-A08B-01A	TCGA-A8-A08B-01A	10.73	M0	1	Alive	37.98	0
TCGA-A8-A08C-01A	TCGA-A8-A08C-01A	9.377	M0	1	Alive	28.94	0
TCGA-A8-A08F-01A	TCGA-A8-A08F-01A	11.42	M0	1	Alive	32.98	0
TCGA-A8-A08G-01A	TCGA-A8-A08G-01A	11.14	M0	1	Alive	19.94	0
TCGA-A8-A08H-01A	TCGA-A8-A08H-01A	12.78	M0	1	Alive	0	0
TCGA-A8-A08I-01A	TCGA-A8-A08I-01A	11.09	M0	1	Alive	11.99	0
TCGA-A8-A08L-01A	TCGA-A8-A08L-01A	11.42	M0	1	Dead	9.99	1
TCGA-A8-A08P-01A	TCGA-A8-A08P-01A	8.844	M0	1	Alive	30.98	0
TCGA-A8-A08R-01A	TCGA-A8-A08R-01A	10.18	M0	1	Alive	0.99	0
TCGA-A8-A08S-01A	TCGA-A8-A08S-01A	9.45	M0	1	Alive	32.98	0
TCGA-A8-A08X-01A	TCGA-A8-A08X-01A	9.924	M0	1	Alive	42.97	0
TCGA-A8-A08Z-01A	TCGA-A8-A08Z-01A	11.91	M0	1	Alive	39.98	0
TCGA-A8-A090-01A	TCGA-A8-A090-01A	9.727	M0	1	Alive	0	0
TCGA-A8-A091-01A	TCGA-A8-A091-01A	10.31	M0	1	Alive	32.98	0
TCGA-A8-A092-01A	TCGA-A8-A092-01A	7.342	M0	1	Alive	30.95	0
TCGA-A8-A093-01A	TCGA-A8-A093-01A	10.2	M0	1	Alive	17.94	0
TCGA-A8-A094-01A	TCGA-A8-A094-01A	9.466	M0	1	Alive	0	0
TCGA-A8-A095-01A	TCGA-A8-A095-01A	11.07	M0	1	Alive	41.95	0
TCGA-A8-A096-01A	TCGA-A8-A096-01A	8.209	M0	1	Alive	0	0
TCGA-A8-A097-01A	TCGA-A8-A097-01A	10.32	M0	1	Alive	11.99	0
TCGA-A8-A09A-01A	TCGA-A8-A09A-01A	9.785	M0	1	Alive	9.99	0
TCGA-A8-A09B-01A	TCGA-A8-A09B-01A	8.553	M0	1	Alive	11.99	0
TCGA-A8-A09D-01A	TCGA-A8-A09D-01A	9.365	M0	1	Alive	50	0
TCGA-A8-A09E-01A	TCGA-A8-A09E-01A	7.785	M0	1	Alive	49.01	0
TCGA-A8-A09G-01A	TCGA-A8-A09G-01A	9.547	M0	1	Alive	0	0
TCGA-A8-A09I-01A	TCGA-A8-A09I-01A	10.17	M0	1	Alive	45.04	0
TCGA-A8-A09K-01A	TCGA-A8-A09K-01A	10.93	M0	1	Alive	29.96	0
TCGA-A8-A09M-01A	TCGA-A8-A09M-01A	9.981	M0	1	Alive	33.05	0
TCGA-A8-A09N-01A	TCGA-A8-A09N-01A	9.334	M0	1	Alive	1.02	0
TCGA-A8-A09Q-01A	TCGA-A8-A09Q-01A	9.061	M0	1	Alive	25	0
TCGA-A8-A09R-01A	TCGA-A8-A09R-01A	8.295	M0	1	Alive	8.97	0
TCGA-A8-A09V-01A	TCGA-A8-A09V-01A	9.967	M0	1	Alive	15.01	0
TCGA-A8-A09W-01A	TCGA-A8-A09W-01A	6.976	M0	1	Alive	0.99	0
TCGA-A8-A09X-01A	TCGA-A8-A09X-01A	10.01	M0	1	Dead	13.99	1
TCGA-A8-A09Z-01A	TCGA-A8-A09Z-01A	9.348	M0	1	Alive	0	0
TCGA-A8-A0A1-01A	TCGA-A8-A0A1-01A	9.713	M0	1	Alive	11.99	0
TCGA-A8-A0A2-01A	TCGA-A8-A0A2-01A	10.27	M0	1	Alive	19.02	0
TCGA-A8-A0A4-01A	TCGA-A8-A0A4-01A	10.42	M0	1	Alive	13.01	0
TCGA-A8-A0A6-01A	TCGA-A8-A0A6-01A	10.5	M0	1	Alive	21.02	0
TCGA-A8-A0A7-01A	TCGA-A8-A0A7-01A	10.55	M0	1	Alive	0.99	0
TCGA-A8-A0A9-01A	TCGA-A8-A0A9-01A	7.896	M0	1	Alive	27	0
TCGA-A8-A0AB-01A	TCGA-A8-A0AB-01A	10.97	M0	1	Alive	17.02	0
TCGA-A8-A0AD-01A	TCGA-A8-A0AD-01A	6.971	M0	1	Alive	38.01	0
TCGA-AC-A23H-01A	TCGA-AC-A23H-01A	6.378	M0	1	Dead	5.72	1
TCGA-AC-A2B8-01A	TCGA-AC-A2B8-01A	9.053	M0	1	Alive	22.24	0
TCGA-AC-A2FK-01A	TCGA-AC-A2FK-01A	10.84	M0	1	Alive	87.06	0
TCGA-AC-A2FM-01A	TCGA-AC-A2FM-01A	10.67	M0	1	Dead	26.02	1
TCGA-AC-A2QJ-01A	TCGA-AC-A2QJ-01A	12.02	M0	1	Dead	14.65	1
TCGA-AC-A3EH-01A	TCGA-AC-A3EH-01A	12.31	M0	1	Dead	6.47	1
TCGA-AC-A3TM-01A	TCGA-AC-A3TM-01A	10.49	M0	1	Alive	25.03	0
TCGA-AC-A4ZE-01A	TCGA-AC-A4ZE-01A	9.859	M0	1	Alive	29.24	0
TCGA-AN-A03X-01A	TCGA-AN-A03X-01A	0	M0	1	Alive	0.33	0
TCGA-AN-A03Y-01A	TCGA-AN-A03Y-01A	8.999	M0	1	Alive	0.33	0
TCGA-AN-A041-01A	TCGA-AN-A041-01A	8.099	M0	1	Alive	0.23	0
TCGA-AN-A046-01A	TCGA-AN-A046-01A	10.16	M0	1	Alive	0.33	0
TCGA-AN-A049-01A	TCGA-AN-A049-01A	9.483	M0	1	Alive	0.62	0
TCGA-AN-A04A-01A	TCGA-AN-A04A-01A	7.629	M0	1	Alive	2.96	0
TCGA-AN-A04C-01A	TCGA-AN-A04C-01A	7.632	M0	1	Alive	1.77	0
TCGA-AN-A04D-01A	TCGA-AN-A04D-01A	9.507	M0	1	Alive	1.71	0
TCGA-AN-A0AJ-01A	TCGA-AN-A0AJ-01A	11.7	M0	1	Alive	9.95	0
TCGA-AN-A0AK-01A	TCGA-AN-A0AK-01A	9.977	M0	1	Alive	7.36	0
TCGA-AN-A0AL-01A	TCGA-AN-A0AL-01A	9.633	M0	1	Alive	7.46	0
TCGA-AN-A0AM-01A	TCGA-AN-A0AM-01A	9.557	M0	1	Alive	0.16	0
TCGA-AN-A0AR-01A	TCGA-AN-A0AR-01A	7.632	M0	1	Alive	0.33	0
TCGA-AN-A0AS-01A	TCGA-AN-A0AS-01A	8.587	M0	1	Alive	0.33	0
TCGA-AN-A0AT-01A	TCGA-AN-A0AT-01A	10.02	M0	1	Alive	0.33	0
TCGA-AN-A0FD-01A	TCGA-AN-A0FD-01A	9.636	M0	1	Alive	6.44	0
TCGA-AN-A0FF-01A	TCGA-AN-A0FF-01A	9.636	M0	1	Alive	5.65	0
TCGA-AN-A0FK-01A	TCGA-AN-A0FK-01A	7.733	M0	1	Alive	7	0
TCGA-AN-A0FL-01A	TCGA-AN-A0FL-01A	9.12	M0	1	Alive	7.59	0
TCGA-AN-A0FN-01A	TCGA-AN-A0FN-01A	9.84	M0	1	Alive	7.16	0
TCGA-AN-A0FS-01A	TCGA-AN-A0FS-01A	8.684	M0	1	Alive	6.9	0
TCGA-AN-A0FT-01A	TCGA-AN-A0FT-01A	9.716	M0	1	Alive	7.03	0
TCGA-AN-A0FV-01A	TCGA-AN-A0FV-01A	9.707	M0	1	Alive	0.33	0
TCGA-AN-A0FW-01A	TCGA-AN-A0FW-01A	10.12	M0	1	Alive	0.36	0
TCGA-AN-A0FX-01A	TCGA-AN-A0FX-01A	10.41	M0	1	Alive	0.33	0
TCGA-AN-A0FY-01A	TCGA-AN-A0FY-01A	8.758	M0	1	Alive	0.33	0
TCGA-AN-A0FZ-01A	TCGA-AN-A0FZ-01A	10.02	M0	1	Alive	0.33	0
TCGA-AN-A0G0-01A	TCGA-AN-A0G0-01A	6.4	M0	1	Alive	0.53	0
TCGA-AN-A0XL-01A	TCGA-AN-A0XL-01A	9.948	M0	1	Alive	5.35	0
TCGA-AN-A0XN-01A	TCGA-AN-A0XN-01A	11.03	M0	1	Alive	0.33	0
TCGA-AN-A0XO-01A	TCGA-AN-A0XO-01A	10.33	M0	1	Alive	12.32	0
TCGA-AN-A0XP-01A	TCGA-AN-A0XP-01A	8.141	M0	1	Alive	0.3	0
TCGA-AN-A0XR-01A	TCGA-AN-A0XR-01A	8.889	M0	1	Alive	0.33	0
TCGA-AN-A0XS-01A	TCGA-AN-A0XS-01A	9.325	M0	1	Alive	0.33	0
TCGA-AN-A0XT-01A	TCGA-AN-A0XT-01A	10.73	M0	1	Alive	0.33	0
TCGA-AN-A0XU-01A	TCGA-AN-A0XU-01A	8.134	M0	1	Alive	0.33	0
TCGA-AN-A0XV-01A	TCGA-AN-A0XV-01A	10.88	M0	1	Alive	5.32	0
TCGA-AN-A0XW-01A	TCGA-AN-A0XW-01A	8.73	M0	1	Alive	5.58	0
TCGA-AO-A03L-01A	TCGA-AO-A03L-01A	8.531	M0	1	Alive	80.22	0
TCGA-AO-A03M-01B	TCGA-AO-A03M-01B	10.88	M0	1	Alive	61.3	0
TCGA-AO-A03N-01B	TCGA-AO-A03N-01B	14	M0	1	Alive	66.72	0
TCGA-AO-A03O-01A	TCGA-AO-A03O-01A	9.306	M0	1	Dead	81.57	1
TCGA-AO-A03P-01A	TCGA-AO-A03P-01A	0	M0	1	Dead	95.63	1
TCGA-AO-A03R-01A	TCGA-AO-A03R-01A	11.67	M0	1	Alive	68.69	0
TCGA-AO-A03T-01A	TCGA-AO-A03T-01A	11.73	M0	1	Alive	69.78	0
TCGA-AO-A03U-01B	TCGA-AO-A03U-01B	8.436	M0	1	Dead	58.9	1
TCGA-AO-A03V-01A	TCGA-AO-A03V-01A	9.517	M0	1	Alive	44.38	0
TCGA-AO-A0J2-01A	TCGA-AO-A0J2-01A	9.516	M0	1	Alive	32.75	0
TCGA-AO-A0J3-01A	TCGA-AO-A0J3-01A	12.08	M0	1	Alive	21.39	0
TCGA-AO-A0J4-01A	TCGA-AO-A0J4-01A	11.06	M0	1	Alive	52.14	0
TCGA-AO-A0J6-01A	TCGA-AO-A0J6-01A	13.47	M0	1	Alive	37.45	0
TCGA-AO-A0J7-01A	TCGA-AO-A0J7-01A	12.23	M0	1	Alive	20.3	0
TCGA-AO-A0J8-01A	TCGA-AO-A0J8-01A	11.36	M0	1	Alive	22.34	0
TCGA-AO-A0J9-01A	TCGA-AO-A0J9-01A	11.55	M0	1	Alive	52.99	0
TCGA-AO-A0JA-01A	TCGA-AO-A0JA-01A	9.596	M0	1	Alive	21.52	0
TCGA-AO-A0JB-01A	TCGA-AO-A0JB-01A	10.62	M0	1	Alive	50.66	0
TCGA-AO-A0JC-01A	TCGA-AO-A0JC-01A	14.08	M0	1	Alive	50.82	0
TCGA-AO-A0JD-01A	TCGA-AO-A0JD-01A	10.41	M0	1	Alive	71.94	0
TCGA-AO-A0JE-01A	TCGA-AO-A0JE-01A	10	M0	1	Alive	76.71	0
TCGA-AO-A0JF-01A	TCGA-AO-A0JF-01A	9.034	M0	1	Alive	65.05	0
TCGA-AO-A0JG-01A	TCGA-AO-A0JG-01A	9.533	M0	1	Alive	26.22	0
TCGA-AO-A0JI-01A	TCGA-AO-A0JI-01A	12.04	M0	1	Alive	50.2	0
TCGA-AO-A0JJ-01A	TCGA-AO-A0JJ-01A	10.64	M0	1	Alive	61.99	0
TCGA-AO-A0JL-01A	TCGA-AO-A0JL-01A	7.412	M0	1	Alive	55.29	0
TCGA-AO-A0JM-01A	TCGA-AO-A0JM-01A	9.329	M0	1	Alive	71.75	0
TCGA-AO-A124-01A	TCGA-AO-A124-01A	10.49	M0	1	Alive	115.18	0
TCGA-AO-A125-01A	TCGA-AO-A125-01A	8.302	M0	1	Alive	113.53	0
TCGA-AO-A126-01A	TCGA-AO-A126-01A	0	M0	1	Alive	108.64	0
TCGA-AO-A128-01A	TCGA-AO-A128-01A	14.48	M0	1	Alive	106.7	0
TCGA-AO-A129-01A	TCGA-AO-A129-01A	11.97	M0	1	Alive	107.95	0
TCGA-AO-A12A-01A	TCGA-AO-A12A-01A	11.3	M0	1	Alive	102.23	0
TCGA-AO-A12B-01A	TCGA-AO-A12B-01A	6.966	M0	1	Alive	98.19	0
TCGA-AO-A12C-01A	TCGA-AO-A12C-01A	9.192	M0	1	Alive	77.92	0
TCGA-AO-A12D-01A	TCGA-AO-A12D-01A	9.851	M0	1	Alive	82.62	0
TCGA-AO-A12E-01A	TCGA-AO-A12E-01A	9.388	M0	1	Alive	70.37	0
TCGA-AO-A12F-01A	TCGA-AO-A12F-01A	9.113	M0	1	Alive	60.51	0
TCGA-AO-A12G-01A	TCGA-AO-A12G-01A	6.854	M0	1	Alive	53.84	0
TCGA-AO-A12H-01A	TCGA-AO-A12H-01A	8.51	M0	1	Alive	40.54	0
TCGA-AO-A1KO-01A	TCGA-AO-A1KO-01A	10.95	M0	1	Alive	20.43	0
TCGA-AO-A1KP-01A	TCGA-AO-A1KP-01A	12.06	M0	1	Alive	97.01	0
TCGA-AO-A1KQ-01A	TCGA-AO-A1KQ-01A	11.83	M0	1	Alive	61.83	0
TCGA-AO-A1KR-01A	TCGA-AO-A1KR-01A	9.611	M0	1	Alive	82.56	0
TCGA-AO-A1KS-01A	TCGA-AO-A1KS-01A	10.13	M0	1	Alive	11.5	0
TCGA-AO-A1KT-01A	TCGA-AO-A1KT-01A	11.51	M0	1	Alive	17.77	0
TCGA-AQ-A04J-01A	TCGA-AQ-A04J-01A	11.88	M0	1	Alive	26.91	0
TCGA-AQ-A54N-01A	TCGA-AQ-A54N-01A	11	M0	1	Alive	2.56	0
TCGA-AQ-A54O-01A	TCGA-AQ-A54O-01A	9.396	M0	1	Alive	32.88	0
TCGA-AQ-A7U7-01A	TCGA-AQ-A7U7-01A	10.28	M0	1	Dead	19.19	1
TCGA-AR-A0TP-01A	TCGA-AR-A0TP-01A	8.259	M0	1	Alive	140.44	0
TCGA-AR-A0TQ-01A	TCGA-AR-A0TQ-01A	10.14	M0	1	Alive	98.26	0
TCGA-AR-A0TR-01A	TCGA-AR-A0TR-01A	8.862	M0	1	Dead	5.26	1
TCGA-AR-A0TS-01A	TCGA-AR-A0TS-01A	10.7	M0	1	Alive	84.03	0
TCGA-AR-A0TT-01A	TCGA-AR-A0TT-01A	10.28	M0	1	Alive	108.94	0
TCGA-AR-A0TU-01A	TCGA-AR-A0TU-01A	10.56	M0	1	Alive	23.29	0
TCGA-AR-A0TV-01A	TCGA-AR-A0TV-01A	7.664	M0	1	Alive	75.16	0
TCGA-AR-A0TW-01A	TCGA-AR-A0TW-01A	8.624	M0	1	Alive	98.85	0
TCGA-AR-A0TX-01A	TCGA-AR-A0TX-01A	11.3	M0	1	Alive	64.78	0
TCGA-AR-A0TY-01A	TCGA-AR-A0TY-01A	9.806	M0	1	Dead	55.81	1
TCGA-AR-A0U0-01A	TCGA-AR-A0U0-01A	9.38	M0	1	Alive	65.31	0
TCGA-AR-A0U1-01A	TCGA-AR-A0U1-01A		M0	1	Alive	133.11	0
TCGA-AR-A0U2-01A	TCGA-AR-A0U2-01A	9.219	M0	1	Dead	83.8	1
TCGA-AR-A0U3-01A	TCGA-AR-A0U3-01A	12.44	M0	1	Alive	134.03	0
TCGA-AR-A0U4-01A	TCGA-AR-A0U4-01A	15.76	M0	1	Alive	107.13	0
TCGA-AR-A1AH-01A	TCGA-AR-A1AH-01A	8.566	M0	1	Alive	125.07	0
TCGA-AR-A1AI-01A	TCGA-AR-A1AI-01A	14.93	M0	1	Alive	108.28	0
TCGA-AR-A1AJ-01A	TCGA-AR-A1AJ-01A	13.16	M0	1	Alive	100.92	0
TCGA-AR-A1AK-01A	TCGA-AR-A1AK-01A	10.18	M0	1	Alive	103.78	0
TCGA-AR-A1AL-01A	TCGA-AR-A1AL-01A	11.24	M0	1	Alive	97.6	0
TCGA-AR-A1AM-01A	TCGA-AR-A1AM-01A	10.95	M0	1	Alive	98.26	0
TCGA-AR-A1AN-01A	TCGA-AR-A1AN-01A	8.612	M0	1	Alive	95.93	0
TCGA-AR-A1AO-01A	TCGA-AR-A1AO-01A	13.69	M0	1	Alive	86.01	0
TCGA-AR-A1AP-01A	TCGA-AR-A1AP-01A	11.21	M0	1	Alive	93.82	0
TCGA-AR-A1AQ-01A	TCGA-AR-A1AQ-01A	12.36	M0	1	Alive	99.24	0
TCGA-AR-A1AR-01A	TCGA-AR-A1AR-01A	11.03	M0	1	Dead	17.21	1
TCGA-AR-A1AS-01A	TCGA-AR-A1AS-01A	7.05	M0	1	Alive	37.78	0
TCGA-AR-A1AT-01A	TCGA-AR-A1AT-01A	10.69	M0	1	Dead	41.79	1
TCGA-AR-A1AU-01A	TCGA-AR-A1AU-01A	8.993	M0	1	Alive	94.22	0
TCGA-AR-A1AV-01A	TCGA-AR-A1AV-01A	8.342	M0	1	Alive	61.24	0
TCGA-AR-A1AW-01A	TCGA-AR-A1AW-01A	12.58	M0	1	Alive	86.47	0
TCGA-AR-A1AX-01A	TCGA-AR-A1AX-01A	11.37	M0	1	Alive	86.37	0
TCGA-AR-A1AY-01A	TCGA-AR-A1AY-01A	12.7	M0	1	Alive	33.71	0
TCGA-AR-A24H-01A	TCGA-AR-A24H-01A	9.88	M0	1	Alive	160.78	0
TCGA-AR-A24K-01A	TCGA-AR-A24K-01A	8.341	M0	1	Alive	50.85	0
TCGA-AR-A24L-01A	TCGA-AR-A24L-01A	9.417	M0	1	Dead	94.15	1
TCGA-AR-A24M-01A	TCGA-AR-A24M-01A	7.139	M0	1	Alive	120.24	0
TCGA-AR-A24N-01A	TCGA-AR-A24N-01A	11.28	M0	1	Alive	99.7	0
TCGA-AR-A24O-01A	TCGA-AR-A24O-01A	9.505	M0	1	Alive	118.5	0
TCGA-AR-A24P-01A	TCGA-AR-A24P-01A	11.78	M0	1	Alive	2.76	0
TCGA-AR-A24Q-01A	TCGA-AR-A24Q-01A	7.924	M0	1	Alive	104.2	0
TCGA-AR-A24R-01A	TCGA-AR-A24R-01A	10.48	M0	1	Alive	112.68	0
TCGA-AR-A24S-01A	TCGA-AR-A24S-01A	6.35	M0	1	Alive	97.77	0
TCGA-AR-A24T-01A	TCGA-AR-A24T-01A	7.456	M0	1	Alive	105.19	0
TCGA-AR-A24U-01A	TCGA-AR-A24U-01A	10.32	M0	1	Alive	102.76	0
TCGA-AR-A24V-01A	TCGA-AR-A24V-01A	8.982	M0	1	Alive	105.22	0
TCGA-AR-A24W-01A	TCGA-AR-A24W-01A	9.796	M0	1	Alive	50.92	0
TCGA-AR-A24X-01A	TCGA-AR-A24X-01A	8.132	M0	1	Alive	98.69	0
TCGA-AR-A24Z-01A	TCGA-AR-A24Z-01A	9.141	M0	1	Alive	98.59	0
TCGA-AR-A250-01A	TCGA-AR-A250-01A	9.409	M0	1	Alive	88.93	0
TCGA-AR-A251-01A	TCGA-AR-A251-01A	12.55	M0	1	Alive	99.54	0
TCGA-AR-A252-01A	TCGA-AR-A252-01A	10.39	M0	1	Alive	93.23	0
TCGA-AR-A254-01A	TCGA-AR-A254-01A	7.856	M0	1	Alive	85.58	0
TCGA-AR-A255-01A	TCGA-AR-A255-01A	10.58	M0	1	Alive	70.99	0
TCGA-AR-A256-01A	TCGA-AR-A256-01A	10.54	M0	1	Dead	93.76	1
TCGA-AR-A2LE-01A	TCGA-AR-A2LE-01A	7.068	M0	1	Alive	166.29	0
TCGA-AR-A2LH-01A	TCGA-AR-A2LH-01A	11.43	M0	1	Dead	20.24	1
TCGA-AR-A2LK-01A	TCGA-AR-A2LK-01A	10.35	M0	1	Dead	54.17	1
TCGA-AR-A2LL-01A	TCGA-AR-A2LL-01A	8.189	M0	1	Alive	66.1	0
TCGA-AR-A2LM-01A	TCGA-AR-A2LM-01A	11.47	M0	1	Alive	63.57	0
TCGA-AR-A2LN-01A	TCGA-AR-A2LN-01A	11.85	M0	1	Alive	38.14	0
TCGA-AR-A2LO-01A	TCGA-AR-A2LO-01A	10.8	M0	1	Alive	39.36	0
TCGA-AR-A2LQ-01A	TCGA-AR-A2LQ-01A	10.44	M0	1	Alive	40.51	0
TCGA-AR-A2LR-01A	TCGA-AR-A2LR-01A	10.34	M0	1	Alive	57.23	0
TCGA-AR-A5QM-01A	TCGA-AR-A5QM-01A	10.12	M0	1	Alive	73.29	0
TCGA-AR-A5QN-01A	TCGA-AR-A5QN-01A	12.73	M0	1	Alive	33.28	0
TCGA-AR-A5QP-01A	TCGA-AR-A5QP-01A	11.31	M0	1	Alive	38.93	0
TCGA-AR-A5QQ-01A	TCGA-AR-A5QQ-01A	13.71	M0	1	Dead	10.58	1
TCGA-B6-A0I1-01A	TCGA-B6-A0I1-01A	8.84	M0	1	Dead	77.56	1
TCGA-B6-A0I2-01A	TCGA-B6-A0I2-01A	15.1	M0	1	Alive	143.27	0
TCGA-B6-A0I5-01A	TCGA-B6-A0I5-01A	13.22	M0	1	Alive	281.08	0
TCGA-B6-A0I6-01A	TCGA-B6-A0I6-01A	8.967	M0	1	Dead	32.56	1
TCGA-B6-A0I8-01A	TCGA-B6-A0I8-01A	9.038	M0	1	Dead	24.61	1
TCGA-B6-A0IA-01A	TCGA-B6-A0IA-01A	8.861	M0	1	Alive	275.66	0
TCGA-B6-A0IE-01A	TCGA-B6-A0IE-01A	8.913	M0	1	Dead	65.47	1
TCGA-B6-A0IG-01A	TCGA-B6-A0IG-01A	10.68	M0	1	Dead	146.39	1
TCGA-B6-A0IH-01A	TCGA-B6-A0IH-01A	10.27	M0	1	Dead	112.29	1
TCGA-B6-A0IJ-01A	TCGA-B6-A0IJ-01A	13.43	M0	1	Alive	233.44	0
TCGA-B6-A0IK-01A	TCGA-B6-A0IK-01A	10.7	M0	1	Dead	18.76	1
TCGA-B6-A0IM-01A	TCGA-B6-A0IM-01A	10.38	M0	1	Dead	127.23	1
TCGA-B6-A0IO-01A	TCGA-B6-A0IO-01A	9.307	M0	1	Alive	165.64	0
TCGA-B6-A0IP-01A	TCGA-B6-A0IP-01A	8.243	M0	1	Dead	128.98	1
TCGA-B6-A0IQ-01A	TCGA-B6-A0IQ-01A	10.34	M0	1	Alive	140.77	0
TCGA-B6-A0RE-01A	TCGA-B6-A0RE-01A	13.72	M0	1	Alive	255.49	0
TCGA-B6-A0RG-01A	TCGA-B6-A0RG-01A	10.19	M0	1	Alive	68.4	0
TCGA-B6-A0RH-01A	TCGA-B6-A0RH-01A	11.6	M0	1	Dead	212.09	1
TCGA-B6-A0RI-01A	TCGA-B6-A0RI-01A	9.066	M0	1	Alive	234.1	0
TCGA-B6-A0RL-01A	TCGA-B6-A0RL-01A	12.49	M0	1	Dead	81.11	1
TCGA-B6-A0RN-01A	TCGA-B6-A0RN-01A	10.04	M0	1	Alive	263.07	0
TCGA-B6-A0RO-01A	TCGA-B6-A0RO-01A	14.29	M0	1	Alive	161.93	0
TCGA-B6-A0RP-01A	TCGA-B6-A0RP-01A	7.918	M0	1	Dead	102.69	1
TCGA-B6-A0RQ-01A	TCGA-B6-A0RQ-01A	10.5	M0	1	Dead	140.18	1
TCGA-B6-A0RS-01A	TCGA-B6-A0RS-01A	8.463	M0	1	Dead	100.62	1
TCGA-B6-A0RT-01A	TCGA-B6-A0RT-01A	12.22	M0	1	Alive	89.39	0
TCGA-B6-A0RU-01A	TCGA-B6-A0RU-01A	8.974	M0	1	Alive	282.69	0
TCGA-B6-A0RV-01A	TCGA-B6-A0RV-01A	11.6	M0	1	Alive	169.38	0
TCGA-B6-A0WT-01A	TCGA-B6-A0WT-01A	12.43	M0	1	Alive	188.53	0
TCGA-B6-A0WV-01A	TCGA-B6-A0WV-01A	9.271	M0	1	Dead	79.4	1
TCGA-B6-A0WX-01A	TCGA-B6-A0WX-01A	10.95	M0	1	Dead	20.99	1
TCGA-B6-A0WY-01A	TCGA-B6-A0WY-01A	10.88	M0	1	Dead	113.7	1
TCGA-B6-A0WZ-01A	TCGA-B6-A0WZ-01A	10.03	M0	1	Alive	206.7	0
TCGA-B6-A0X0-01A	TCGA-B6-A0X0-01A	7.479	M0	1	Dead	129.6	1
TCGA-B6-A0X4-01A	TCGA-B6-A0X4-01A	8.903	M0	1	Dead	28.25	1
TCGA-B6-A0X5-01A	TCGA-B6-A0X5-01A	9.797	M0	1	Dead	68.89	1
TCGA-B6-A1KC-01B	TCGA-B6-A1KC-01B	11.94	M0	1	Alive	43.56	0
TCGA-B6-A1KF-01A	TCGA-B6-A1KF-01A	7.097	M0	1	Alive	101.45	0
TCGA-B6-A1KI-01A	TCGA-B6-A1KI-01A	9.289	M0	1	Alive	73.46	0
TCGA-B6-A1KN-01A	TCGA-B6-A1KN-01A	12.27	M0	1	Alive	139.06	0
TCGA-B6-A2IU-01A	TCGA-B6-A2IU-01A	9.985	M0	1	Alive	170.04	0
TCGA-B6-A400-01A	TCGA-B6-A400-01A	11.45	M0	1	Alive	7.06	0
TCGA-B6-A401-01A	TCGA-B6-A401-01A	11.83	M0	1	Alive	85.28	0
TCGA-B6-A402-01A	TCGA-B6-A402-01A	8.345	M0	1	Alive	74.93	0
TCGA-B6-A408-01A	TCGA-B6-A408-01A	15.05	M0	1	Alive	68.07	0
TCGA-B6-A409-01A	TCGA-B6-A409-01A	9.976	M0	1	Dead	18.82	1
TCGA-B6-A40B-01A	TCGA-B6-A40B-01A	13.3	M0	1	Alive	103.55	0
TCGA-B6-A40C-01A	TCGA-B6-A40C-01A	9.035	M0	1	Alive	71.09	0
TCGA-BH-A0AU-01A	TCGA-BH-A0AU-01A	10.07	M0	1	Alive	62.88	0
TCGA-BH-A0AV-01A	TCGA-BH-A0AV-01A	9.556	M0	1	Alive	59.79	0
TCGA-BH-A0AW-01A	TCGA-BH-A0AW-01A	9.645	M0	1	Alive	20.43	0
TCGA-BH-A0AY-01A	TCGA-BH-A0AY-01A	11.36	M0	1	Alive	25.53	0
TCGA-BH-A0B0-01A	TCGA-BH-A0B0-01A	11.24	M0	1	Alive	81.37	0
TCGA-BH-A0B1-01A	TCGA-BH-A0B1-01A	10.26	M0	1	Alive	37.71	0
TCGA-BH-A0B3-01A	TCGA-BH-A0B3-01A	10.22	M0	1	Alive	39.52	0
TCGA-BH-A0B4-01A	TCGA-BH-A0B4-01A	10.16	M0	1	Alive	39.13	0
TCGA-BH-A0B5-01A	TCGA-BH-A0B5-01A	13.47	M0	1	Alive	70.17	0
TCGA-BH-A0B6-01A	TCGA-BH-A0B6-01A	11.92	M0	1	Alive	81.57	0
TCGA-BH-A0B7-01A	TCGA-BH-A0B7-01A	11.57	M0	1	Alive	84.07	0
TCGA-BH-A0B8-01A	TCGA-BH-A0B8-01A	9.039	M0	1	Alive	51.54	0
TCGA-BH-A0B9-01A	TCGA-BH-A0B9-01A	15.4	M0	1	Alive	51.64	0
TCGA-BH-A0BA-01A	TCGA-BH-A0BA-01A	9.71	M0	1	Alive	37.19	0
TCGA-BH-A0BC-01A	TCGA-BH-A0BC-01A	10.4	M0	1	Alive	32	0
TCGA-BH-A0BD-01A	TCGA-BH-A0BD-01A	10.28	M0	1	Alive	18.2	0
TCGA-BH-A0BF-01A	TCGA-BH-A0BF-01A	10.87	M0	1	Dead	43.5	1
TCGA-BH-A0BG-01A	TCGA-BH-A0BG-01A	11.56	M0	1	Alive	61.47	0
TCGA-BH-A0BJ-01A	TCGA-BH-A0BJ-01A	8.668	M0	1	Alive	21.68	0
TCGA-BH-A0BL-01A	TCGA-BH-A0BL-01A	10.63	M0	1	Alive	74.84	0
TCGA-BH-A0BM-01A	TCGA-BH-A0BM-01A	9.039	M0	1	Alive	61.63	0
TCGA-BH-A0BO-01A	TCGA-BH-A0BO-01A	10.94	M0	1	Alive	72.17	0
TCGA-BH-A0BP-01A	TCGA-BH-A0BP-01A	10.3	M0	1	Dead	75.43	1
TCGA-BH-A0BQ-01A	TCGA-BH-A0BQ-01A	12.81	M0	1	Alive	74.08	0
TCGA-BH-A0BR-01A	TCGA-BH-A0BR-01A	9.711	M0	1	Alive	76.54	0
TCGA-BH-A0BS-11A	TCGA-BH-A0BS-11A	11.97	M0	1	Alive	85.81	0
TCGA-BH-A0BT-01A	TCGA-BH-A0BT-01A	10.06	M0	1	Alive	77.69	0
TCGA-BH-A0BV-01A	TCGA-BH-A0BV-01A	7.787	M0	1	Alive	49.9	0
TCGA-BH-A0BW-01A	TCGA-BH-A0BW-01A	10.91	M0	1	Alive	77.89	0
TCGA-BH-A0BZ-01A	TCGA-BH-A0BZ-01A	8.741	M0	1	Alive	74.08	0
TCGA-BH-A0C0-01A	TCGA-BH-A0C0-01A	11.27	M0	1	Alive	41.72	0
TCGA-BH-A0C1-01B	TCGA-BH-A0C1-01B	8.117	M0	1	Dead	46.35	1
TCGA-BH-A0C3-01A	TCGA-BH-A0C3-01A	10.43	M0	1	Alive	88.99	0
TCGA-BH-A0C7-01B	TCGA-BH-A0C7-01B	9.43	M0	1	Alive	90.9	0
TCGA-BH-A0DD-01A	TCGA-BH-A0DD-01A	8.917	M0	1	Alive	81.67	0
TCGA-BH-A0DE-01A	TCGA-BH-A0DE-01A	10.79	M0	1	Alive	77.92	0
TCGA-BH-A0DG-01A	TCGA-BH-A0DG-01A	10.75	M0	1	Alive	67.05	0
TCGA-BH-A0DH-01A	TCGA-BH-A0DH-01A	8.358	M0	1	Alive	37.98	0
TCGA-BH-A0DI-01A	TCGA-BH-A0DI-01A	12.64	M0	1	Alive	29.96	0
TCGA-BH-A0DK-01A	TCGA-BH-A0DK-01A	11.27	M0	1	Alive	13.9	0
TCGA-BH-A0DL-01A	TCGA-BH-A0DL-01A	11.96	M0	1	Alive	78.22	0
TCGA-BH-A0DO-01B	TCGA-BH-A0DO-01B	9.941	M0	1	Alive	54.01	0
TCGA-BH-A0DP-01A	TCGA-BH-A0DP-01A	12.76	M0	1	Alive	15.64	0
TCGA-BH-A0DQ-01A	TCGA-BH-A0DQ-01A	9.384	M0	1	Alive	3.22	0
TCGA-BH-A0DS-01A	TCGA-BH-A0DS-01A	12.87	M0	1	Alive	2.56	0
TCGA-BH-A0DT-01A	TCGA-BH-A0DT-01A	11.11	M0	1	Alive	78.94	0
TCGA-BH-A0DV-01A	TCGA-BH-A0DV-01A	9.971	M0	1	Alive	67.81	0
TCGA-BH-A0DX-01A	TCGA-BH-A0DX-01A	11.26	M0	1	Alive	70.83	0
TCGA-BH-A0DZ-11A	TCGA-BH-A0DZ-11A	12.66	M0	1	Alive	16.26	0
TCGA-BH-A0E0-01A	TCGA-BH-A0E0-01A	12.5	M0	1	Alive	4.4	0
TCGA-BH-A0E1-01A	TCGA-BH-A0E1-01A	9.416	M0	1	Alive	15.67	0
TCGA-BH-A0E2-01A	TCGA-BH-A0E2-01A	12.07	M0	1	Alive	14.29	0
TCGA-BH-A0E6-01A	TCGA-BH-A0E6-01A	11.46	M0	1	Alive	9.63	0
TCGA-BH-A0E7-01A	TCGA-BH-A0E7-01A	7.341	M0	1	Alive	44.78	0
TCGA-BH-A0E9-01B	TCGA-BH-A0E9-01B	10.44	M0	1	Alive	81.77	0
TCGA-BH-A0EA-01A	TCGA-BH-A0EA-01A	10.59	M0	1	Dead	32.56	1
TCGA-BH-A0EB-01A	TCGA-BH-A0EB-01A	9.095	M0	1	Alive	24.47	0
TCGA-BH-A0EE-01A	TCGA-BH-A0EE-01A	10.15	M0	1	Alive	30.98	0
TCGA-BH-A0EI-01A	TCGA-BH-A0EI-01A	11.81	M0	1	Alive	63.27	0
TCGA-BH-A0GY-01A	TCGA-BH-A0GY-01A	13.62	M0	1	Alive	30.32	0
TCGA-BH-A0GZ-01A	TCGA-BH-A0GZ-01A	10.73	M0	1	Alive	10.78	0
TCGA-BH-A0H0-01A	TCGA-BH-A0H0-01A	8.241	M0	1	Alive	15.14	0
TCGA-BH-A0H3-01A	TCGA-BH-A0H3-01A	11.33	M0	1	Alive	63.34	0
TCGA-BH-A0H5-01A	TCGA-BH-A0H5-01A	12.21	M0	1	Alive	53.22	0
TCGA-BH-A0H6-01A	TCGA-BH-A0H6-01A	10.39	M0	1	Alive	24.54	0
TCGA-BH-A0H7-01A	TCGA-BH-A0H7-01A	10.77	M0	1	Alive	23.06	0
TCGA-BH-A0H9-01A	TCGA-BH-A0H9-01A	9.577	M0	1	Alive	40.97	0
TCGA-BH-A0HA-01A	TCGA-BH-A0HA-01A	10.9	M0	1	Alive	52.92	0
TCGA-BH-A0HB-01A	TCGA-BH-A0HB-01A	10.9	M0	1	Alive	26.48	0
TCGA-BH-A0HF-01A	TCGA-BH-A0HF-01A	11.76	M0	1	Alive	23.88	0
TCGA-BH-A0HI-01A	TCGA-BH-A0HI-01A	9.467	M0	1	Alive	20.37	0
TCGA-BH-A0HK-01A	TCGA-BH-A0HK-01A	11.85	M0	1	Alive	5.85	0
TCGA-BH-A0HL-01A	TCGA-BH-A0HL-01A	0	M0	1	Alive	2.37	0
TCGA-BH-A0HN-01A	TCGA-BH-A0HN-01A	9.186	M0	1	Alive	16.95	0
TCGA-BH-A0HO-01A	TCGA-BH-A0HO-01A	7.91	M0	1	Alive	2.5	0
TCGA-BH-A0HP-01A	TCGA-BH-A0HP-01A	9.048	M0	1	Alive	13.6	0
TCGA-BH-A0HQ-01A	TCGA-BH-A0HQ-01A	11.76	M0	1	Alive	36.83	0
TCGA-BH-A0HU-01A	TCGA-BH-A0HU-01A	6.555	M0	1	Alive	12.88	0
TCGA-BH-A0HW-01A	TCGA-BH-A0HW-01A	10.9	M0	1	Alive	51.28	0
TCGA-BH-A0HX-01A	TCGA-BH-A0HX-01A	10.17	M0	1	Alive	27.23	0
TCGA-BH-A0HY-01A	TCGA-BH-A0HY-01A	9.33	M0	1	Alive	50.76	0
TCGA-BH-A0RX-01A	TCGA-BH-A0RX-01A	11.47	M0	1	Alive	5.58	0
TCGA-BH-A0W3-01A	TCGA-BH-A0W3-01A	10.95	M0	1	Alive	23.92	0
TCGA-BH-A0W4-01A	TCGA-BH-A0W4-01A	10.7	M0	1	Alive	24.93	0
TCGA-BH-A0W5-01A	TCGA-BH-A0W5-01A	12.73	M0	1	Alive	42.31	0
TCGA-BH-A0W7-01A	TCGA-BH-A0W7-01A	13.77	M0	1	Alive	44.78	0
TCGA-BH-A0WA-01A	TCGA-BH-A0WA-01A	8.157	M0	1	Alive	23.03	0
TCGA-BH-A18F-01A	TCGA-BH-A18F-01A	10.38	M0	1	Alive	32.88	0
TCGA-BH-A18G-01A	TCGA-BH-A18G-01A	0	M0	1	Alive	4.89	0
TCGA-BH-A18H-01A	TCGA-BH-A18H-01A	9.982	M0	1	Alive	21.42	0
TCGA-BH-A18K-01A	TCGA-BH-A18K-01A	8.597	M0	1	Dead	90.77	1
TCGA-BH-A18L-01A	TCGA-BH-A18L-01A	7.985	M0	1	Dead	26.64	1
TCGA-BH-A18M-01A	TCGA-BH-A18M-01A	8.967	M0	1	Dead	72.5	1
TCGA-BH-A18N-01A	TCGA-BH-A18N-01A	7.588	M0	1	Dead	37.71	1
TCGA-BH-A18P-01A	TCGA-BH-A18P-01A	10.01	M0	1	Dead	30.26	1
TCGA-BH-A18Q-01A	TCGA-BH-A18Q-01A	10.97	M0	1	Dead	55.58	1
TCGA-BH-A18R-01A	TCGA-BH-A18R-01A	8.667	M0	1	Dead	37.52	1
TCGA-BH-A18S-01A	TCGA-BH-A18S-01A	8.121	M0	1	Dead	66	1
TCGA-BH-A18T-01A	TCGA-BH-A18T-01A	14.73	M0	1	Dead	7.36	1
TCGA-BH-A18U-01A	TCGA-BH-A18U-01A	6.623	M0	1	Dead	51.35	1
TCGA-BH-A18V-01A	TCGA-BH-A18V-01A	7.56	M0	1	Dead	51.12	1
TCGA-BH-A1EN-01A	TCGA-BH-A1EN-01A	9.571	M0	1	Dead	69.88	1
TCGA-BH-A1EO-01A	TCGA-BH-A1EO-01A	10.53	M0	1	Dead	91.92	1
TCGA-BH-A1ES-01A	TCGA-BH-A1ES-01A	12.13	M0	1	Dead	113.73	1
TCGA-BH-A1ET-01A	TCGA-BH-A1ET-01A	8.871	M0	1	Dead	82.79	1
TCGA-BH-A1EU-01A	TCGA-BH-A1EU-01A	10.6	M0	1	Dead	42.25	1
TCGA-BH-A1EV-01A	TCGA-BH-A1EV-01A	11.14	M0	1	Dead	11.99	1
TCGA-BH-A1EW-01A	TCGA-BH-A1EW-01A	10.34	M0	1	Dead	55.65	1
TCGA-BH-A1EX-01A	TCGA-BH-A1EX-01A	8.305	M0	1	Dead	49.54	1
TCGA-BH-A1EY-01A	TCGA-BH-A1EY-01A	13.93	M0	1	Dead	17.67	1
TCGA-BH-A1F0-01A	TCGA-BH-A1F0-01A	11.59	M0	1	Dead	25.79	1
TCGA-BH-A1F2-01A	TCGA-BH-A1F2-01A	7.929	M0	1	Dead	31.5	1
TCGA-BH-A1F5-01A	TCGA-BH-A1F5-01A	10.19	M0	1	Dead	89.09	1
TCGA-BH-A1F8-01A	TCGA-BH-A1F8-01A	10.8	M0	1	Dead	25.07	1
TCGA-BH-A1FB-01A	TCGA-BH-A1FB-01A	11.16	M0	1	Dead	120.53	1
TCGA-BH-A1FC-01A	TCGA-BH-A1FC-01A	11.5	M0	1	Dead	114.06	1
TCGA-BH-A1FD-01A	TCGA-BH-A1FD-01A	11.77	M0	1	Dead	33.15	1
TCGA-BH-A1FE-01A	TCGA-BH-A1FE-01A	10.75	M0	1	Dead	74.67	1
TCGA-BH-A1FG-01A	TCGA-BH-A1FG-01A	10.5	M0	1	Dead	122.73	1
TCGA-BH-A1FJ-01A	TCGA-BH-A1FJ-01A	8.539	M0	1	Dead	63.3	1
TCGA-BH-A1FL-01A	TCGA-BH-A1FL-01A	9.65	M0	1	Dead	54.96	1
TCGA-BH-A1FM-01A	TCGA-BH-A1FM-01A	9.698	M0	1	Dead	45.6	1
TCGA-BH-A1FN-01A	TCGA-BH-A1FN-01A	8.044	M0	1	Dead	72.01	1
TCGA-BH-A1FR-01A	TCGA-BH-A1FR-01A	10.09	M0	1	Dead	53.94	1
TCGA-BH-A1FU-01A	TCGA-BH-A1FU-01A	10.36	M0	1	Dead	55.45	1
TCGA-BH-A201-01A	TCGA-BH-A201-01A	10.55	M0	1	Alive	28.12	0
TCGA-BH-A202-01A	TCGA-BH-A202-01A	9.864	M0	1	Alive	26.12	0
TCGA-BH-A203-01A	TCGA-BH-A203-01A	11.92	M0	1	Dead	38.57	1
TCGA-BH-A204-01A	TCGA-BH-A204-01A	10.96	M0	1	Dead	83.25	1
TCGA-BH-A208-01A	TCGA-BH-A208-01A	9.729	M0	1	Dead	57.79	1
TCGA-BH-A209-01A	TCGA-BH-A209-01A	12.04	M0	1	Dead	130.06	1
TCGA-BH-A28O-01A	TCGA-BH-A28O-01A	11.35	M0	1	Alive	36.79	0
TCGA-BH-A28Q-01A	TCGA-BH-A28Q-01A	11.64	M0	1	Alive	36.76	0
TCGA-BH-A2L8-01A	TCGA-BH-A2L8-01A	15.24	M0	1	Alive	20.11	0
TCGA-BH-A42T-01A	TCGA-BH-A42T-01A	9.052	M0	1	Dead	10.51	1
TCGA-BH-A42U-01A	TCGA-BH-A42U-01A	11.7	M0	1	Alive	110.51	0
TCGA-BH-A42V-01A	TCGA-BH-A42V-01A	11.29	M0	1	Alive	20.86	0
TCGA-BH-A5J0-01A	TCGA-BH-A5J0-01A	8.059	M0	1	Alive	23.49	0
TCGA-BH-A6R8-01A	TCGA-BH-A6R8-01A	8.172	M0	1	Alive	9.63	0
TCGA-BH-A6R9-01A	TCGA-BH-A6R9-01A	11.01	M0	1	Alive	5.26	0
TCGA-BH-A8FY-01A	TCGA-BH-A8FY-01A	9.895	M0	1	Dead	9.69	1
TCGA-BH-A8FZ-01A	TCGA-BH-A8FZ-01A	11.66	M0	1	Alive	18.86	0
TCGA-BH-A8G0-01A	TCGA-BH-A8G0-01A	11.46	M0	1	Alive	21.75	0
TCGA-BH-AB28-01A	TCGA-BH-AB28-01A	10.26	M0	1	Alive	9.43	0
TCGA-C8-A12K-01A	TCGA-C8-A12K-01A	14.26	M0	1	Alive	0	0
TCGA-C8-A12L-01A	TCGA-C8-A12L-01A	8.371	M0	1	Alive	11.93	0
TCGA-C8-A12M-01A	TCGA-C8-A12M-01A	0	M0	1	Alive	11.76	0
TCGA-C8-A12N-01A	TCGA-C8-A12N-01A	10.56	M0	1	Alive	11.76	0
TCGA-C8-A12O-01A	TCGA-C8-A12O-01A	10.48	M0	1	Alive	12.65	0
TCGA-C8-A12P-01A	TCGA-C8-A12P-01A	0	M0	1	Alive	11.76	0
TCGA-C8-A12Q-01A	TCGA-C8-A12Q-01A	9.683	M0	1	Dead	12.65	1
TCGA-C8-A12T-01A	TCGA-C8-A12T-01A	7.01	M0	1	Alive	0	0
TCGA-C8-A12U-01A	TCGA-C8-A12U-01A	9.314	M0	1	Alive	12.65	0
TCGA-C8-A12V-01A	TCGA-C8-A12V-01A	12.83	M0	1	Alive	12.65	0
TCGA-C8-A12W-01A	TCGA-C8-A12W-01A	10.53	M0	1	Alive	12.65	0
TCGA-C8-A12X-01A	TCGA-C8-A12X-01A	12.99	M0	1	Alive	12.65	0
TCGA-C8-A12Y-01A	TCGA-C8-A12Y-01A	7.923	M0	1	Alive	48.49	0
TCGA-C8-A12Z-01A	TCGA-C8-A12Z-01A	8.112	M0	1	Alive	12.55	0
TCGA-C8-A130-01A	TCGA-C8-A130-01A	9.7	M0	1	Alive	12.16	0
TCGA-C8-A131-01A	TCGA-C8-A131-01A	8.11	M0	1	Alive	13.5	0
TCGA-C8-A132-01A	TCGA-C8-A132-01A	11.16	M0	1	Alive	12.58	0
TCGA-C8-A133-01A	TCGA-C8-A133-01A	15.22	M0	1	Alive	0	0
TCGA-C8-A134-01A	TCGA-C8-A134-01A	13.4	M0	1	Alive	12.58	0
TCGA-C8-A135-01A	TCGA-C8-A135-01A	0	M0	1	Alive	12.91	0
TCGA-C8-A137-01A	TCGA-C8-A137-01A	0	M0	1	Alive	12.45	0
TCGA-C8-A138-01A	TCGA-C8-A138-01A	14.26	M0	1	Alive	12.48	0
TCGA-C8-A1HE-01A	TCGA-C8-A1HE-01A	8.999	M0	1	Alive	12.32	0
TCGA-C8-A1HF-01A	TCGA-C8-A1HF-01A	9.372	M0	1	Alive	10.91	0
TCGA-C8-A1HG-01A	TCGA-C8-A1HG-01A	10.89	M0	1	Alive	11.33	0
TCGA-C8-A1HI-01A	TCGA-C8-A1HI-01A	8.46	M0	1	Alive	11.27	0
TCGA-C8-A1HJ-01A	TCGA-C8-A1HJ-01A	10.8	M0	1	Alive	0.16	0
TCGA-C8-A1HK-01A	TCGA-C8-A1HK-01A	9.159	M0	1	Alive	12.02	0
TCGA-C8-A1HL-01A	TCGA-C8-A1HL-01A	8.805	M0	1	Alive	10.41	0
TCGA-C8-A1HM-01A	TCGA-C8-A1HM-01A	11.23	M0	1	Alive	12.32	0
TCGA-C8-A1HN-01A	TCGA-C8-A1HN-01A	10.5	M0	1	Alive	12.94	0
TCGA-C8-A1HO-01A	TCGA-C8-A1HO-01A	11.85	M0	1	Alive	12.32	0
TCGA-C8-A26V-01A	TCGA-C8-A26V-01A	9.259	M0	1	Alive	20.24	0
TCGA-C8-A26W-01A	TCGA-C8-A26W-01A	10.71	M0	1	Alive	12.52	0
TCGA-C8-A26X-01A	TCGA-C8-A26X-01A	9.345	M0	1	Alive	12.35	0
TCGA-C8-A26Y-01A	TCGA-C8-A26Y-01A	10.97	M0	1	Alive	12.94	0
TCGA-C8-A26Z-01A	TCGA-C8-A26Z-01A	10.05	M0	1	Alive	15.44	0
TCGA-C8-A273-01A	TCGA-C8-A273-01A	10.77	M0	1	Alive	16.85	0
TCGA-C8-A274-01A	TCGA-C8-A274-01A	8.231	M0	1	Alive	16.69	0
TCGA-C8-A275-01A	TCGA-C8-A275-01A	9.668	M0	1	Alive	0.03	0
TCGA-C8-A278-01A	TCGA-C8-A278-01A	9.066	M0	1	Alive	9.76	0
TCGA-C8-A27A-01A	TCGA-C8-A27A-01A	13.23	M0	1	Alive	24.54	0
TCGA-C8-A27B-01A	TCGA-C8-A27B-01A	9.191	M0	1	Alive	14.42	0
TCGA-C8-A3M7-01A	TCGA-C8-A3M7-01A	10.27	M0	1	Dead	33.97	1
TCGA-C8-A3M8-01A	TCGA-C8-A3M8-01A	11.85	M0	1	Alive	12.94	0
TCGA-C8-A8HP-01A	TCGA-C8-A8HP-01A	10.4	M0	1	Alive	13.01	0
TCGA-C8-A8HQ-01A	TCGA-C8-A8HQ-01A	9.122	M0	1	Alive	12.48	0
TCGA-C8-A8HR-01A	TCGA-C8-A8HR-01A	9.882	M0	1	Alive	13.4	0
TCGA-C8-A9FZ-01A	TCGA-C8-A9FZ-01A		M0	1	Alive	19.45	0
TCGA-D8-A13Y-01A	TCGA-D8-A13Y-01A	8.547	M0	1	Alive	56.77	0
TCGA-D8-A13Z-01A	TCGA-D8-A13Z-01A	9.376	M0	1	Alive	20.86	0
TCGA-D8-A140-01A	TCGA-D8-A140-01A	8.346	M0	1	Alive	13.24	0
TCGA-D8-A141-01A	TCGA-D8-A141-01A	10.98	M0	1	Alive	20.57	0
TCGA-D8-A142-01A	TCGA-D8-A142-01A	9.369	M0	1	Alive	13.96	0
TCGA-D8-A143-01A	TCGA-D8-A143-01A	9.338	M0	1	Alive	14.16	0
TCGA-D8-A145-01A	TCGA-D8-A145-01A	11.64	M0	1	Alive	13.47	0
TCGA-D8-A147-01A	TCGA-D8-A147-01A	9.773	M0	1	Alive	19.19	0
TCGA-D8-A1J8-01A	TCGA-D8-A1J8-01A	9.388	M0	1	Alive	14.16	0
TCGA-D8-A1J9-01A	TCGA-D8-A1J9-01A	10.39	M0	1	Alive	17.48	0
TCGA-D8-A1JA-01A	TCGA-D8-A1JA-01A	8.581	M0	1	Alive	16.49	0
TCGA-D8-A1JB-01A	TCGA-D8-A1JB-01A	10.6	M0	1	Alive	55.45	0
TCGA-D8-A1JC-01A	TCGA-D8-A1JC-01A	11.47	M0	1	Alive	15.77	0
TCGA-D8-A1JD-01A	TCGA-D8-A1JD-01A	7.661	M0	1	Alive	18.13	0
TCGA-D8-A1JE-01A	TCGA-D8-A1JE-01A	7.337	M0	1	Alive	18.89	0
TCGA-D8-A1JF-01A	TCGA-D8-A1JF-01A	9.363	M0	1	Alive	12.02	0
TCGA-D8-A1JG-01B	TCGA-D8-A1JG-01B	9.142	M0	1	Alive	52.96	0
TCGA-D8-A1JH-01A	TCGA-D8-A1JH-01A	10.33	M0	1	Alive	13.99	0
TCGA-D8-A1JJ-01A	TCGA-D8-A1JJ-01A	7.948	M0	1	Alive	20.07	0
TCGA-D8-A1JK-01A	TCGA-D8-A1JK-01A	7.075	M0	1	Alive	20.11	0
TCGA-D8-A1JL-01A	TCGA-D8-A1JL-01A	11.81	M0	1	Alive	20.07	0
TCGA-D8-A1JM-01A	TCGA-D8-A1JM-01A	14.8	M0	1	Alive	19.38	0
TCGA-D8-A1JP-01A	TCGA-D8-A1JP-01A	9.604	M0	1	Alive	20.99	0
TCGA-D8-A1JS-01A	TCGA-D8-A1JS-01A	8.958	M0	1	Alive	12.19	0
TCGA-D8-A1JT-01A	TCGA-D8-A1JT-01A	9.215	M0	1	Alive	13.3	0
TCGA-D8-A1JU-01A	TCGA-D8-A1JU-01A	8.403	M0	1	Alive	14.68	0
TCGA-D8-A1X8-01A	TCGA-D8-A1X8-01A	9.062	M0	1	Alive	25.72	0
TCGA-D8-A1X9-01A	TCGA-D8-A1X9-01A	9.119	M0	1	Alive	23.88	0
TCGA-D8-A1XA-01A	TCGA-D8-A1XA-01A	10.27	M0	1	Alive	27.56	0
TCGA-D8-A1XB-01A	TCGA-D8-A1XB-01A	11.35	M0	1	Alive	18.13	0
TCGA-D8-A1XC-01A	TCGA-D8-A1XC-01A	7.004	M0	1	Dead	12.39	1
TCGA-D8-A1XD-01A	TCGA-D8-A1XD-01A	11.15	M0	1	Alive	17.15	0
TCGA-D8-A1XF-01A	TCGA-D8-A1XF-01A	11.32	M0	1	Alive	15.21	0
TCGA-D8-A1XG-01A	TCGA-D8-A1XG-01A	10.19	M0	1	Alive	14.72	0
TCGA-D8-A1XM-01A	TCGA-D8-A1XM-01A	9.928	M0	1	Alive	17.67	0
TCGA-D8-A1XO-01A	TCGA-D8-A1XO-01A	8.565	M0	1	Alive	55.26	0
TCGA-D8-A1XQ-01A	TCGA-D8-A1XQ-01A	7.929	M0	1	Alive	16.39	0
TCGA-D8-A1XR-01A	TCGA-D8-A1XR-01A	0	M0	1	Alive	15.83	0
TCGA-D8-A1XS-01A	TCGA-D8-A1XS-01A	9.606	M0	1	Alive	16.29	0
TCGA-D8-A1XT-01A	TCGA-D8-A1XT-01A	8.981	M0	1	Alive	16.62	0
TCGA-D8-A1XU-01A	TCGA-D8-A1XU-01A	9.832	M0	1	Alive	12.98	0
TCGA-D8-A1XV-01A	TCGA-D8-A1XV-01A	8.814	M0	1	Alive	15.14	0
TCGA-D8-A1XW-01A	TCGA-D8-A1XW-01A	7.335	M0	1	Alive	43	0
TCGA-D8-A27E-01A	TCGA-D8-A27E-01A	8.664	M0	1	Alive	17.41	0
TCGA-D8-A27F-01A	TCGA-D8-A27F-01A	9.184	M0	1	Alive	16.03	0
TCGA-D8-A27G-01A	TCGA-D8-A27G-01A	7.992	M0	1	Alive	13.44	0
TCGA-D8-A27H-01A	TCGA-D8-A27H-01A	9.689	M0	1	Alive	13.04	0
TCGA-D8-A27I-01A	TCGA-D8-A27I-01A	10.46	M0	1	Alive	14.42	0
TCGA-D8-A27K-01A	TCGA-D8-A27K-01A	11.51	M0	1	Alive	48	0
TCGA-D8-A27L-01A	TCGA-D8-A27L-01A	14.64	M0	1	Alive	16.39	0
TCGA-D8-A27M-01A	TCGA-D8-A27M-01A	10.02	M0	1	Alive	13.47	0
TCGA-D8-A27N-01A	TCGA-D8-A27N-01A	9.497	M0	1	Alive	17.05	0
TCGA-D8-A27P-01A	TCGA-D8-A27P-01A	9.521	M0	1	Alive	1.61	0
TCGA-D8-A27R-01A	TCGA-D8-A27R-01A	11.4	M0	1	Alive	10.09	0
TCGA-D8-A27T-01A	TCGA-D8-A27T-01A	9.295	M0	1	Alive	13.07	0
TCGA-D8-A27V-01A	TCGA-D8-A27V-01A	9.73	M0	1	Alive	12.52	0
TCGA-D8-A27W-01A	TCGA-D8-A27W-01A	7.099	M0	1	Alive	12.25	0
TCGA-D8-A3Z5-01A	TCGA-D8-A3Z5-01A	9.56	M0	1	Alive	33.34	0
TCGA-D8-A3Z6-01A	TCGA-D8-A3Z6-01A	8.839	M0	1	Alive	18.5	0
TCGA-D8-A4Z1-01A	TCGA-D8-A4Z1-01A	9.912	M0	1	Alive	21.65	0
TCGA-D8-A73U-01A	TCGA-D8-A73U-01A	8.981	M0	1	Alive	16.16	0
TCGA-D8-A73X-01A	TCGA-D8-A73X-01A	10.04	M0	1	Alive	25.2	0
TCGA-E2-A105-01A	TCGA-E2-A105-01A	12.6	M0	1	Alive	42.97	0
TCGA-E2-A106-01A	TCGA-E2-A106-01A	9.002	M0	1	Alive	83.48	0
TCGA-E2-A107-01A	TCGA-E2-A107-01A	10.57	M0	1	Alive	34.4	0
TCGA-E2-A108-01A	TCGA-E2-A108-01A	10.32	M0	1	Alive	27.5	0
TCGA-E2-A109-01A	TCGA-E2-A109-01A	9.716	M0	1	Alive	46.55	0
TCGA-E2-A10A-01A	TCGA-E2-A10A-01A	10.02	M0	1	Alive	40.37	0
TCGA-E2-A10B-01A	TCGA-E2-A10B-01A	10.06	M0	1	Alive	37.48	0
TCGA-E2-A10C-01A	TCGA-E2-A10C-01A	11.11	M0	1	Alive	40.08	0
TCGA-E2-A10E-01A	TCGA-E2-A10E-01A	7.987	M0	1	Alive	28.42	0
TCGA-E2-A10F-01A	TCGA-E2-A10F-01A	9.782	M0	1	Alive	28.84	0
TCGA-E2-A14N-01A	TCGA-E2-A14N-01A	10.35	M0	1	Alive	47.11	0
TCGA-E2-A14O-01A	TCGA-E2-A14O-01A	10.21	M0	1	Alive	44.65	0
TCGA-E2-A14P-01A	TCGA-E2-A14P-01A	11.45	M0	1	Alive	40.93	0
TCGA-E2-A14Q-01A	TCGA-E2-A14Q-01A	9.953	M0	1	Alive	38.21	0
TCGA-E2-A14R-01A	TCGA-E2-A14R-01A	10.03	M0	1	Alive	38.57	0
TCGA-E2-A14S-01A	TCGA-E2-A14S-01A		M0	1	Alive	33.15	0
TCGA-E2-A14T-01A	TCGA-E2-A14T-01A	10.81	M0	1	Alive	75.92	0
TCGA-E2-A14U-01A	TCGA-E2-A14U-01A	11.56	M0	1	Alive	43.3	0
TCGA-E2-A14V-01A	TCGA-E2-A14V-01A	7.525	M0	1	Alive	34.23	0
TCGA-E2-A14W-01A	TCGA-E2-A14W-01A	9.086	M0	1	Alive	32	0
TCGA-E2-A14X-01A	TCGA-E2-A14X-01A	11.49	M0	1	Alive	31.93	0
TCGA-E2-A14Y-01A	TCGA-E2-A14Y-01A	10.1	M0	1	Alive	69.28	0
TCGA-E2-A14Z-01A	TCGA-E2-A14Z-01A	9.948	M0	1	Dead	18.5	1
TCGA-E2-A150-01A	TCGA-E2-A150-01A	11.17	M0	1	Alive	63.57	0
TCGA-E2-A152-01A	TCGA-E2-A152-01A	6.811	M0	1	Alive	69.91	0
TCGA-E2-A153-01A	TCGA-E2-A153-01A	10.46	M0	1	Alive	23.23	0
TCGA-E2-A154-01A	TCGA-E2-A154-01A	13.78	M0	1	Alive	19.42	0
TCGA-E2-A155-01A	TCGA-E2-A155-01A	7.914	M0	1	Alive	21.02	0
TCGA-E2-A156-01A	TCGA-E2-A156-01A	8.718	M0	1	Alive	23.85	0
TCGA-E2-A158-01A	TCGA-E2-A158-01A	13.95	M0	1	Alive	14.78	0
TCGA-E2-A159-01A	TCGA-E2-A159-01A	10.64	M0	1	Alive	25.03	0
TCGA-E2-A15A-01A	TCGA-E2-A15A-01A	6.452	M0	1	Alive	23.32	0
TCGA-E2-A15C-01A	TCGA-E2-A15C-01A	11.14	M0	1	Alive	22.8	0
TCGA-E2-A15D-01A	TCGA-E2-A15D-01A	13.69	M0	1	Alive	17.28	0
TCGA-E2-A15E-01A	TCGA-E2-A15E-01A	9.086	M0	1	Alive	20.7	0
TCGA-E2-A15F-01A	TCGA-E2-A15F-01A	12.61	M0	1	Alive	21.62	0
TCGA-E2-A15G-01A	TCGA-E2-A15G-01A	7.817	M0	1	Alive	18.2	0
TCGA-E2-A15H-01A	TCGA-E2-A15H-01A	9.806	M0	1	Alive	12.91	0
TCGA-E2-A15I-01A	TCGA-E2-A15I-01A	12.91	M0	1	Alive	55.58	0
TCGA-E2-A15J-01A	TCGA-E2-A15J-01A	8.958	M0	1	Alive	53.88	0
TCGA-E2-A15K-01A	TCGA-E2-A15K-01A	8.316	M0	1	Alive	9.03	0
TCGA-E2-A15L-01A	TCGA-E2-A15L-01A	8.047	M0	1	Alive	20.57	0
TCGA-E2-A15M-01A	TCGA-E2-A15M-01A	9.736	M0	1	Dead	11.04	1
TCGA-E2-A15O-01A	TCGA-E2-A15O-01A	13.74	M0	1	Alive	50.76	0
TCGA-E2-A15P-01A	TCGA-E2-A15P-01A	10.98	M0	1	Alive	19.55	0
TCGA-E2-A15R-01A	TCGA-E2-A15R-01A	12.52	M0	1	Alive	56.9	0
TCGA-E2-A15S-01A	TCGA-E2-A15S-01A	10.52	M0	1	Alive	14.06	0
TCGA-E2-A15T-01A	TCGA-E2-A15T-01A	9.922	M0	1	Alive	51.35	0
TCGA-E2-A1AZ-01A	TCGA-E2-A1AZ-01A	13.46	M0	1	Alive	76.51	0
TCGA-E2-A1B0-01A	TCGA-E2-A1B0-01A	9.591	M0	1	Alive	53.58	0
TCGA-E2-A1B1-01A	TCGA-E2-A1B1-01A	11.64	M0	1	Alive	87.16	0
TCGA-E2-A1B4-01A	TCGA-E2-A1B4-01A	9.229	M0	1	Dead	32.98	1
TCGA-E2-A1B5-01A	TCGA-E2-A1B5-01A	11.37	M0	1	Alive	32.33	0
TCGA-E2-A1B6-01A	TCGA-E2-A1B6-01A	14.83	M0	1	Alive	28.48	0
TCGA-E2-A1BC-01A	TCGA-E2-A1BC-01A	9.771	M0	1	Alive	16.46	0
TCGA-E2-A1BD-01A	TCGA-E2-A1BD-01A	12.25	M0	1	Alive	37.22	0
TCGA-E2-A1IE-01A	TCGA-E2-A1IE-01A	11.09	M0	1	Alive	77.6	0
TCGA-E2-A1IF-01A	TCGA-E2-A1IF-01A	10.43	M0	1	Alive	37.39	0
TCGA-E2-A1IG-01A	TCGA-E2-A1IG-01A	10.48	M0	1	Alive	70.3	0
TCGA-E2-A1IH-01A	TCGA-E2-A1IH-01A	10.8	M0	1	Alive	33.71	0
TCGA-E2-A1II-01A	TCGA-E2-A1II-01A	16.83	M0	1	Alive	33.67	0
TCGA-E2-A1IJ-01A	TCGA-E2-A1IJ-01A	9.998	M0	1	Alive	28.42	0
TCGA-E2-A1IK-01A	TCGA-E2-A1IK-01A	10.47	M0	1	Alive	59.13	0
TCGA-E2-A1IL-01A	TCGA-E2-A1IL-01A	9.564	M0	1	Alive	3.88	0
TCGA-E2-A1IN-01A	TCGA-E2-A1IN-01A	9.527	M0	1	Alive	22.17	0
TCGA-E2-A1IO-01A	TCGA-E2-A1IO-01A	10.07	M0	1	Alive	60.94	0
TCGA-E2-A1IU-01A	TCGA-E2-A1IU-01A	10.39	M0	1	Alive	11.07	0
TCGA-E2-A1L6-01A	TCGA-E2-A1L6-01A	10.66	M0	1	Alive	54.14	0
TCGA-E2-A1L7-01A	TCGA-E2-A1L7-01A	10.61	M0	1	Alive	60.32	0
TCGA-E2-A1L8-01A	TCGA-E2-A1L8-01A	8.801	M0	1	Alive	73.59	0
TCGA-E2-A1L9-01A	TCGA-E2-A1L9-01A	9	M0	1	Alive	19.65	0
TCGA-E2-A1LA-01A	TCGA-E2-A1LA-01A	8.945	M0	1	Alive	24.57	0
TCGA-E2-A1LB-01A	TCGA-E2-A1LB-01A	7.025	M0	1	Alive	75.76	0
TCGA-E2-A1LE-01A	TCGA-E2-A1LE-01A	8.452	M0	1	Dead	28.88	1
TCGA-E2-A1LG-01A	TCGA-E2-A1LG-01A	9.013	M0	1	Alive	50.03	0
TCGA-E2-A1LH-01A	TCGA-E2-A1LH-01A	11.93	M0	1	Alive	106.67	0
TCGA-E2-A1LI-01A	TCGA-E2-A1LI-01A	10.43	M0	1	Alive	102.53	0
TCGA-E2-A1LK-01A	TCGA-E2-A1LK-01A	12.18	M0	1	Dead	8.74	1
TCGA-E2-A1LS-01A	TCGA-E2-A1LS-01A	10.15	M0	1	Alive	52.69	0
TCGA-E2-A2P5-01A	TCGA-E2-A2P5-01A	10.44	M0	1	Dead	26.97	1
TCGA-E2-A2P6-01A	TCGA-E2-A2P6-01A	8.792	M0	1	Alive	34.53	0
TCGA-E2-A3DX-01A	TCGA-E2-A3DX-01A	11.15	M0	1	Alive	43.53	0
TCGA-E2-A56Z-01A	TCGA-E2-A56Z-01A	12.74	M0	1	Alive	8.28	0
TCGA-E2-A570-01A	TCGA-E2-A570-01A	13.55	M0	1	Alive	30.58	0
TCGA-E2-A572-01A	TCGA-E2-A572-01A	10.14	M0	1	Alive	39.68	0
TCGA-E2-A573-01A	TCGA-E2-A573-01A	9.426	M0	1	Alive	34.89	0
TCGA-E2-A574-01A	TCGA-E2-A574-01A	10.67	M0	1	Alive	38.73	0
TCGA-E9-A1N3-01A	TCGA-E9-A1N3-01A	12.42	M0	1	Alive	34.79	0
TCGA-E9-A1N4-01A	TCGA-E9-A1N4-01A	9.234	M0	1	Alive	32.85	0
TCGA-E9-A1N5-01A	TCGA-E9-A1N5-01A	10.65	M0	1	Alive	36.79	0
TCGA-E9-A1N6-01A	TCGA-E9-A1N6-01A	10.73	M0	1	Dead	22.27	1
TCGA-E9-A1N8-01A	TCGA-E9-A1N8-01A	11.59	M0	1	Alive	34.13	0
TCGA-E9-A1N9-01A	TCGA-E9-A1N9-01A	6.96	M0	1	Alive	36.17	0
TCGA-E9-A1NA-01A	TCGA-E9-A1NA-01A	9.76	M0	1	Alive	36.53	0
TCGA-E9-A1NC-01A	TCGA-E9-A1NC-01A	10.52	M0	1	Alive	39.52	0
TCGA-E9-A1ND-01A	TCGA-E9-A1ND-01A	9.685	M0	1	Alive	41.59	0
TCGA-E9-A1NE-01A	TCGA-E9-A1NE-01A	10.04	M0	1	Alive	35.74	0
TCGA-E9-A1NF-01A	TCGA-E9-A1NF-01A	8.956	M0	1	Dead	35.22	1
TCGA-E9-A1NG-01A	TCGA-E9-A1NG-01A	7.391	M0	1	Dead	25.82	1
TCGA-E9-A1NH-01A	TCGA-E9-A1NH-01A	9.731	M0	1	Alive	18.92	0
TCGA-E9-A1NI-01A	TCGA-E9-A1NI-01A	13.11	M0	1	Alive	9.86	0
TCGA-E9-A1QZ-01A	TCGA-E9-A1QZ-01A	11.08	M0	1	Alive	24.8	0
TCGA-E9-A1R0-01A	TCGA-E9-A1R0-01A	10.53	M0	1	Alive	28.25	0
TCGA-E9-A1R3-01A	TCGA-E9-A1R3-01A	8.866	M0	1	Alive	2.56	0
TCGA-E9-A1R4-01A	TCGA-E9-A1R4-01A	8.723	M0	1	Alive	6.11	0
TCGA-E9-A1R5-01A	TCGA-E9-A1R5-01A	8.052	M0	1	Alive	3.02	0
TCGA-E9-A1R6-01A	TCGA-E9-A1R6-01A	10.29	M0	1	Alive	11.14	0
TCGA-E9-A1R7-01A	TCGA-E9-A1R7-01A	10.06	M0	1	Alive	48.19	0
TCGA-E9-A1RA-01A	TCGA-E9-A1RA-01A	12.31	M0	1	Alive	44.97	0
TCGA-E9-A1RB-01A	TCGA-E9-A1RB-01A	12.19	M0	1	Dead	32.06	1
TCGA-E9-A1RC-01A	TCGA-E9-A1RC-01A	12.48	M0	1	Alive	40.21	0
TCGA-E9-A1RD-01A	TCGA-E9-A1RD-01A	9.109	M0	1	Alive	1.12	0
TCGA-E9-A1RE-01A	TCGA-E9-A1RE-01A	10.25	M0	1	Alive	46.62	0
TCGA-E9-A1RF-01A	TCGA-E9-A1RF-01A	7.553	M0	1	Alive	6.57	0
TCGA-E9-A1RG-01A	TCGA-E9-A1RG-01A	9.059	M0	1	Alive	21.25	0
TCGA-E9-A1RH-01A	TCGA-E9-A1RH-01A	8.502	M0	1	Alive	46.55	0
TCGA-E9-A1RI-01A	TCGA-E9-A1RI-01A	9.413	M0	1	Alive	47.6	0
TCGA-E9-A226-01A	TCGA-E9-A226-01A	0	M0	1	Dead	34.43	1
TCGA-E9-A227-01A	TCGA-E9-A227-01A	11.01	M0	1	Alive	32.03	0
TCGA-E9-A228-01A	TCGA-E9-A228-01A	11.76	M0	1	Alive	42.21	0
TCGA-E9-A229-01A	TCGA-E9-A229-01A	9.995	M0	1	Alive	37.71	0
TCGA-E9-A22A-01A	TCGA-E9-A22A-01A	11.92	M0	1	Alive	39.06	0
TCGA-E9-A22B-01A	TCGA-E9-A22B-01A	9.628	M0	1	Alive	38.34	0
TCGA-E9-A22D-01A	TCGA-E9-A22D-01A	10.73	M0	1	Alive	41	0
TCGA-E9-A22E-01A	TCGA-E9-A22E-01A	7.681	M0	1	Alive	41.69	0
TCGA-E9-A22G-01A	TCGA-E9-A22G-01A	13.93	M0	1	Alive	40.7	0
TCGA-E9-A22H-01A	TCGA-E9-A22H-01A	10.1	M0	1	Alive	40.47	0
TCGA-E9-A243-01A	TCGA-E9-A243-01A	11.77	M0	1	Alive	20.11	0
TCGA-E9-A244-01A	TCGA-E9-A244-01A	9.336	M0	1	Alive	0.69	0
TCGA-E9-A245-01A	TCGA-E9-A245-01A	11.14	M0	1	Dead		1
TCGA-E9-A247-01A	TCGA-E9-A247-01A	9.473	M0	1	Alive	38.96	0
TCGA-E9-A248-01A	TCGA-E9-A248-01A	9.23	M0	1	Alive	1.94	0
TCGA-E9-A249-01A	TCGA-E9-A249-01A	13.07	M0	1	Alive	7.13	0
TCGA-E9-A24A-01A	TCGA-E9-A24A-01A	8.363	M0	1	Alive	24.54	0
TCGA-E9-A295-01A	TCGA-E9-A295-01A	12.2	M0	1	Alive	12.32	0
TCGA-E9-A2JS-01A	TCGA-E9-A2JS-01A	11.34	M0	1	Dead	29.7	1
TCGA-E9-A2JT-01A	TCGA-E9-A2JT-01A	13.1	M0	1	Alive	9.46	0
TCGA-E9-A3HO-01A	TCGA-E9-A3HO-01A	11.68	M0	1	Alive	38.04	0
TCGA-E9-A3Q9-01A	TCGA-E9-A3Q9-01A	8.759	M0	1	Alive	32.88	0
TCGA-E9-A3QA-01A	TCGA-E9-A3QA-01A	13.47	M0	1	Alive	30.16	0
TCGA-E9-A3X8-01A	TCGA-E9-A3X8-01A	10.01	M0	1	Alive	30.42	0
TCGA-E9-A54X-01A	TCGA-E9-A54X-01A	13.73	M0	1	Alive	23.88	0
TCGA-E9-A54Y-01A	TCGA-E9-A54Y-01A	10.91	M0	1	Alive	23.82	0
TCGA-E9-A5FK-01A	TCGA-E9-A5FK-01A	10.69	M0	1	Alive	26.68	0
TCGA-E9-A5FL-01A	TCGA-E9-A5FL-01A	12.57	M0	1	Alive	0.79	0
TCGA-E9-A5UO-01A	TCGA-E9-A5UO-01A	6.883	M0	1	Alive	25.79	0
TCGA-E9-A5UP-01A	TCGA-E9-A5UP-01A	9.465	M0	1	Alive	26.38	0
TCGA-EW-A1J1-01A	TCGA-EW-A1J1-01A	9.887	M0	1	Alive	18.89	0
TCGA-EW-A1J3-01A	TCGA-EW-A1J3-01A	10.27	M0	1	Alive	16.56	0
TCGA-EW-A1J5-01A	TCGA-EW-A1J5-01A	10.9	M0	1	Alive	15.67	0
TCGA-EW-A1J6-01A	TCGA-EW-A1J6-01A	10.52	M0	1	Alive	28.75	0
TCGA-EW-A1OZ-01A	TCGA-EW-A1OZ-01A	9.784	M0	1	Alive	40.37	0
TCGA-EW-A1P4-01A	TCGA-EW-A1P4-01A	10.65	M0	1	Alive	29.8	0
TCGA-EW-A1P5-01A	TCGA-EW-A1P5-01A	8.736	M0	1	Alive	23.09	0
TCGA-EW-A1P6-01A	TCGA-EW-A1P6-01A	11.92	M0	1	Alive	18.46	0
TCGA-EW-A1P7-01A	TCGA-EW-A1P7-01A	13.29	M0	1	Alive	30.06	0
TCGA-EW-A1P8-01A	TCGA-EW-A1P8-01A	13.12	M0	1	Dead	7.85	1
TCGA-EW-A1PA-01A	TCGA-EW-A1PA-01A	11.47	M0	1	Alive	18.89	0
TCGA-EW-A1PD-01A	TCGA-EW-A1PD-01A	9.692	M0	1	Alive	13.93	0
TCGA-EW-A1PE-01A	TCGA-EW-A1PE-01A	9.402	M0	1	Alive	10.51	0
TCGA-EW-A1PF-01A	TCGA-EW-A1PF-01A	10.4	M0	1	Alive	14.42	0
TCGA-EW-A1PH-01A	TCGA-EW-A1PH-01A	11.33	M0	1	Alive	19.94	0
TCGA-EW-A3U0-01A	TCGA-EW-A3U0-01A	10.16	M0	1	Alive	17.48	0
TCGA-EW-A6S9-01A	TCGA-EW-A6S9-01A	10.14	M0	1	Alive	15.21	0
TCGA-EW-A6SB-01A	TCGA-EW-A6SB-01A	12.13	M0	1	Alive	24.97	0
TCGA-EW-A6SC-01A	TCGA-EW-A6SC-01A	8.826	M0	1	Alive	31.27	0
TCGA-EW-A6SD-01A	TCGA-EW-A6SD-01A	10.12	M0	1	Alive	33.18	0
TCGA-GM-A2D9-01A	TCGA-GM-A2D9-01A	10.46	M0	1	Dead	59.53	1
TCGA-GM-A2DA-01A	TCGA-GM-A2DA-01A	8.19	M0	1	Dead	216.59	1
TCGA-GM-A2DB-01A	TCGA-GM-A2DB-01A	12.17	M0	1	Alive	79.04	0
TCGA-GM-A2DC-01A	TCGA-GM-A2DC-01A	10.75	M0	1	Alive	83.28	0
TCGA-GM-A2DD-01A	TCGA-GM-A2DD-01A	10.63	M0	1	Alive	74.97	0
TCGA-GM-A2DF-01A	TCGA-GM-A2DF-01A	11.41	M0	1	Alive	70.8	0
TCGA-GM-A2DH-01A	TCGA-GM-A2DH-01A	11.08	M0	1	Alive	72.04	0
TCGA-GM-A2DI-01A	TCGA-GM-A2DI-01A	12.5	M0	1	Alive	85.09	0
TCGA-GM-A2DK-01A	TCGA-GM-A2DK-01A	9.592	M0	1	Alive	86.89	0
TCGA-GM-A2DL-01A	TCGA-GM-A2DL-01A	8.673	M0	1	Alive	115.6	0
TCGA-GM-A2DM-01A	TCGA-GM-A2DM-01A	9.593	M0	1	Alive	105.98	0
TCGA-GM-A2DN-01A	TCGA-GM-A2DN-01A	11.88	M0	1	Alive	101.54	0
TCGA-GM-A2DO-01A	TCGA-GM-A2DO-01A	13.48	M0	1	Alive	85.28	0
TCGA-GM-A3NW-01A	TCGA-GM-A3NW-01A	11.52	M0	1	Alive	110.41	0
TCGA-GM-A3NY-01A	TCGA-GM-A3NY-01A	11.01	M0	1	Alive	38.17	0
TCGA-GM-A3XG-01A	TCGA-GM-A3XG-01A	10.5	M0	1	Alive	43.69	0
TCGA-GM-A3XL-01A	TCGA-GM-A3XL-01A	12.32	M0	1	Alive	69.25	0
TCGA-GM-A3XN-01A	TCGA-GM-A3XN-01A	11.13	M0	1	Alive	66.33	0
TCGA-GM-A4E0-01A	TCGA-GM-A4E0-01A	10.64	M0	1	Alive	71.98	0
TCGA-GM-A5PV-01A	TCGA-GM-A5PV-01A	10.81	M0	1	Alive	13.53	0
TCGA-GM-A5PX-01A	TCGA-GM-A5PX-01A	9.116	M0	1	Alive	18.1	0
TCGA-HN-A2NL-01A	TCGA-HN-A2NL-01A	10.65	M0	1	Alive	2.6	0
TCGA-HN-A2OB-01A	TCGA-HN-A2OB-01A	9.918	M0	1	Dead	62.42	1
TCGA-JL-A3YW-01A	TCGA-JL-A3YW-01A	10.09	M0	1	Alive	11.83	0
TCGA-JL-A3YX-01A	TCGA-JL-A3YX-01A	11.24	M0	1	Alive	11.56	0
TCGA-LD-A74U-01A	TCGA-LD-A74U-01A	11.07	M0	1	Alive	13.21	0
TCGA-LD-A7W5-01A	TCGA-LD-A7W5-01A		M0	1	Alive	7.1	0
TCGA-LD-A7W6-01A	TCGA-LD-A7W6-01A	11.45	M0	1	Alive	13.27	0
TCGA-LD-A9QF-01A	TCGA-LD-A9QF-01A	11.67	M0	1	Alive	10.61	0
TCGA-LL-A5YM-01A	TCGA-LL-A5YM-01A	0	M0	1	Alive	15.31	0
TCGA-LL-A5YN-01A	TCGA-LL-A5YN-01A	12.83	M0	1	Alive	14.68	0
TCGA-LL-A5YP-01A	TCGA-LL-A5YP-01A	9.779	M0	1	Alive	14.78	0
TCGA-LL-A7T0-01A	TCGA-LL-A7T0-01A	11.52	M0	1	Alive	12.35	0
TCGA-MS-A51U-01A	TCGA-MS-A51U-01A	10.7	M0	1	Alive	22.37	0
TCGA-OL-A97C-01A	TCGA-OL-A97C-01A	13.73	M0	1	Alive	8.9	0
TCGA-PE-A5DC-01A	TCGA-PE-A5DC-01A	10.18	M0	1	Dead	46.98	1
TCGA-PE-A5DD-01A	TCGA-PE-A5DD-01A	9.685	M0	1	Alive	64.16	0
TCGA-PE-A5DE-01A	TCGA-PE-A5DE-01A	9.28	M0	1	Alive	86.89	0
TCGA-PL-A8LV-01A	TCGA-PL-A8LV-01A	11.37	M0	1	Alive	-0.23	0
TCGA-PL-A8LY-01A	TCGA-PL-A8LY-01A	11.93	M0	1	Alive	0.26	0
TCGA-PL-A8LZ-01A	TCGA-PL-A8LZ-01A	9.49	M0	1	Alive	9.92	0
TCGA-S3-A6ZF-01A	TCGA-S3-A6ZF-01A	14.37	M0	1	Alive	18.79	0
TCGA-S3-A6ZG-01A	TCGA-S3-A6ZG-01A	12.21	M0	1	Alive	18.46	0
TCGA-S3-AA0Z-01A	TCGA-S3-AA0Z-01A	11.72	M0	1	Alive	20.66	0
TCGA-S3-AA10-01A	TCGA-S3-AA10-01A	11.38	M0	1	Alive	19.25	0
TCGA-S3-AA11-01A	TCGA-S3-AA11-01A	10.54	M0	1	Alive	13.83	0
TCGA-V7-A7HQ-01A	TCGA-V7-A7HQ-01A	9.822	M0	1	Alive	66.79	0
TCGA-Z7-A8R6-01A	TCGA-Z7-A8R6-01A	8.243	M0	1	Alive	106.96	0
TCGA-5L-AAT1-01A	TCGA-5L-AAT1-01A	13.57	M1	2	Alive	48.32	0
TCGA-A2-A0CS-01A	TCGA-A2-A0CS-01A	12.3	M1	2	Dead	77.14	1
TCGA-A2-A0SV-01A	TCGA-A2-A0SV-01A	12.69	M1	2	Dead	27.1	1
TCGA-A2-A0SW-01A	TCGA-A2-A0SW-01A	9.499	M1	2	Dead	44.84	1
TCGA-A2-A0T2-01A	TCGA-A2-A0T2-01A	0	M1	2	Dead	8.38	1
TCGA-A8-A07W-01A	TCGA-A8-A07W-01A	9.784	M1	2	Alive	9.99	0
TCGA-A8-A08J-01A	TCGA-A8-A08J-01A	8.092	M1	2	Dead	37.02	1
TCGA-A8-A08O-01A	TCGA-A8-A08O-01A	8.84	M1	2	Alive	30.98	0
TCGA-A8-A08T-01A	TCGA-A8-A08T-01A	11.91	M1	2	Dead	111.99	1
TCGA-AC-A62V-01A	TCGA-AC-A62V-01A	7.021	M1	2	Dead	11.43	1
TCGA-AN-A0FJ-01A	TCGA-AN-A0FJ-01A	15.32	M1	2	Alive	7.95	0
TCGA-AO-A0J5-01A	TCGA-AO-A0J5-01A	6.286	M1	2	Dead	26.02	1
TCGA-AR-A0TZ-01A	TCGA-AR-A0TZ-01A	8.365	M1	2	Dead	107.16	1
TCGA-B6-A0I9-01A	TCGA-B6-A0I9-01A	8.772	M1	2	Dead	11.89	1
TCGA-B6-A0IB-01A	TCGA-B6-A0IB-01A	8.54	M1	2	Dead	129.47	1
TCGA-B6-A0X1-01A	TCGA-B6-A0X1-01A	14.7	M1	2	Dead	244.91	1
TCGA-B6-A3ZX-01A	TCGA-B6-A3ZX-01A	12.69	M1	2	Dead	37.84	1
TCGA-BH-A18J-01A	TCGA-BH-A18J-01A	7.625	M1	2	Dead	20.11	1
TCGA-BH-A1FH-01A	TCGA-BH-A1FH-01A	10.15	M1	2	Dead	33.97	1
TCGA-LL-A73Z-01A	TCGA-LL-A73Z-01A	11.06	M1	2	Dead	7.46	1
TCGA-PL-A8LX-01A	TCGA-PL-A8LX-01A	8.646	M1	2	Alive	0.16	0
TCGA-UU-A93S-01A	TCGA-UU-A93S-01A	10.78	M1	2	Dead	3.81	1
TCGA-3C-AAAU-01A	TCGA-3C-AAAU-01A	10.37	MX	3	Alive	132.95	0
TCGA-5T-A9QA-01A	TCGA-5T-A9QA-01A	11.57	MX	3	Alive	9.95	0
TCGA-A1-A0SN-01A	TCGA-A1-A0SN-01A	7.504	MX	3	Alive	39.29	0
TCGA-A1-A0SQ-01A	TCGA-A1-A0SQ-01A	7.824	MX	3	Alive	18.2	0
TCGA-A7-A13E-01A	TCGA-A7-A13E-01A	11.73	MX	3	Dead	20.17	1
TCGA-A7-A13G-01B	TCGA-A7-A13G-01B	13.95	MX	3	Alive	23.59	0
TCGA-A7-A13H-01A	TCGA-A7-A13H-01A	11.6	MX	3	Alive	29.53	0
TCGA-A7-A26E-01A	TCGA-A7-A26E-01A	10.48	MX	3	Alive	31.34	0
TCGA-A7-A2KD-01A	TCGA-A7-A2KD-01A	9.749	MX	3	Alive	22.31	0
TCGA-A7-A3J1-01A	TCGA-A7-A3J1-01A	10.58	MX	3	Alive	11.27	0
TCGA-A7-A425-01A	TCGA-A7-A425-01A	10.8	MX	3	Alive	14.68	0
TCGA-A7-A426-01A	TCGA-A7-A426-01A	10.96	MX	3	Alive	11.96	0
TCGA-A7-A4SC-01A	TCGA-A7-A4SC-01A	10.6	MX	3	Alive	14.65	0
TCGA-A8-A07E-01A	TCGA-A8-A07E-01A	9.458	MX	3	Alive	19.97	0
TCGA-A8-A099-01A	TCGA-A8-A099-01A	7.331	MX	3	Alive	9.99	0
TCGA-A8-A09C-01A	TCGA-A8-A09C-01A		MX	3	Alive	1.02	0
TCGA-A8-A09T-01A	TCGA-A8-A09T-01A	0	MX	3	Alive	19.02	0
TCGA-AC-A23C-01A	TCGA-AC-A23C-01A	9.878	MX	3	Alive	19.22	0
TCGA-AC-A23E-01A	TCGA-AC-A23E-01A	9.2	MX	3	Alive	22.93	0
TCGA-AC-A23G-01A	TCGA-AC-A23G-01A	11.29	MX	3	Alive	73.85	0
TCGA-AC-A2BK-01A	TCGA-AC-A2BK-01A	9.858	MX	3	Alive	73	0
TCGA-AC-A2BM-01A	TCGA-AC-A2BM-01A	12.55	MX	3	Alive	99.28	0
TCGA-AC-A2FB-01A	TCGA-AC-A2FB-01A	11.18	MX	3	Alive	40.54	0
TCGA-AC-A2FE-01A	TCGA-AC-A2FE-01A	10.72	MX	3	Dead	86.6	1
TCGA-AC-A2FF-01A	TCGA-AC-A2FF-01A	10.11	MX	3	Alive	90.64	0
TCGA-AC-A2FG-01A	TCGA-AC-A2FG-01A	11.36	MX	3	Alive	60.87	0
TCGA-AC-A2FO-01A	TCGA-AC-A2FO-01A	10.66	MX	3	Alive	74.08	0
TCGA-AC-A2QH-01B	TCGA-AC-A2QH-01B	10.85	MX	3	Alive	33.02	0
TCGA-AC-A2QI-01A	TCGA-AC-A2QI-01A	10.47	MX	3	Alive	19.32	0
TCGA-AC-A3BB-01A	TCGA-AC-A3BB-01A	10.64	MX	3	Alive	32.42	0
TCGA-AC-A3HN-01A	TCGA-AC-A3HN-01A	9.614	MX	3	Alive	16.29	0
TCGA-AC-A3OD-01B	TCGA-AC-A3OD-01B	12.12	MX	3	Alive	14.82	0
TCGA-AC-A3QP-01A	TCGA-AC-A3QP-01A	10.34	MX	3	Alive	22.17	0
TCGA-AC-A3QQ-01B	TCGA-AC-A3QQ-01B	13.45	MX	3	Alive	24.11	0
TCGA-AC-A3TN-01A	TCGA-AC-A3TN-01A	9.719	MX	3	Alive	14.98	0
TCGA-AC-A3W5-01A	TCGA-AC-A3W5-01A	9.942	MX	3	Alive	16.56	0
TCGA-AC-A3W6-01A	TCGA-AC-A3W6-01A	9.836	MX	3	Alive	19.78	0
TCGA-AC-A3W7-01A	TCGA-AC-A3W7-01A	10.01	MX	3	Alive	15.47	0
TCGA-AC-A3YI-01A	TCGA-AC-A3YI-01A	11.58	MX	3	Alive	23.23	0
TCGA-AC-A3YJ-01A	TCGA-AC-A3YJ-01A	8.131	MX	3	Alive	24.77	0
TCGA-AC-A5EH-01A	TCGA-AC-A5EH-01A	8.452	MX	3	Alive	16.79	0
TCGA-AC-A5EI-01A	TCGA-AC-A5EI-01A		MX	3	Alive	14.52	0
TCGA-AC-A5XS-01A	TCGA-AC-A5XS-01A	9.336	MX	3	Alive	19.32	0
TCGA-AC-A5XU-01A	TCGA-AC-A5XU-01A	9.597	MX	3	Alive	14.95	0
TCGA-AC-A62X-01A	TCGA-AC-A62X-01A	9.725	MX	3	Alive	13.7	0
TCGA-AC-A62Y-01A	TCGA-AC-A62Y-01A	10.14	MX	3	Alive	17.41	0
TCGA-AC-A6IV-01A	TCGA-AC-A6IV-01A	9.716	MX	3	Alive	18.66	0
TCGA-AC-A6IW-01A	TCGA-AC-A6IW-01A	13.54	MX	3	Alive	13.57	0
TCGA-AC-A6IX-01A	TCGA-AC-A6IX-01A	9.433	MX	3	Alive	12.25	0
TCGA-AC-A6NO-01A	TCGA-AC-A6NO-01A	12.65	MX	3	Alive	1.68	0
TCGA-AC-A7VB-01A	TCGA-AC-A7VB-01A	12.47	MX	3	Alive	8.21	0
TCGA-AC-A7VC-01A	TCGA-AC-A7VC-01A	10.31	MX	3	Alive	0.03	0
TCGA-AC-A8OP-01A	TCGA-AC-A8OP-01A	10.83	MX	3	Alive	20.17	0
TCGA-AC-A8OQ-01A	TCGA-AC-A8OQ-01A	10.98	MX	3	Alive	1.12	0
TCGA-AC-A8OR-01A	TCGA-AC-A8OR-01A	8.204	MX	3	Alive	1.31	0
TCGA-AC-A8OS-01A	TCGA-AC-A8OS-01A	11.2	MX	3	Alive	2.3	0
TCGA-AQ-A04H-01B	TCGA-AQ-A04H-01B	8.39	MX	3	Alive	24.77	0
TCGA-AQ-A04L-01B	TCGA-AQ-A04L-01B	10.79	MX	3	Alive	129.99	0
TCGA-AQ-A0Y5-01A	TCGA-AQ-A0Y5-01A	0	MX	3	Dead	5.65	1
TCGA-AQ-A1H2-01A	TCGA-AQ-A1H2-01A	6.191	MX	3	Alive	15.6	0
TCGA-AQ-A1H3-01A	TCGA-AQ-A1H3-01A	10.41	MX	3	Alive	32.49	0
TCGA-AR-A2LJ-01A	TCGA-AR-A2LJ-01A	10.9	MX	3	Alive	86.47	0
TCGA-B6-A0IC-01A	TCGA-B6-A0IC-01A	9.394	MX	3	Dead	50.66	1
TCGA-B6-A0IN-01A	TCGA-B6-A0IN-01A	11.45	MX	3	Dead	84.53	1
TCGA-B6-A0RM-01A	TCGA-B6-A0RM-01A	8.616	MX	3	Dead	77.96	1
TCGA-B6-A0WS-01A	TCGA-B6-A0WS-01A	11.35	MX	3	Dead	97.4	1
TCGA-B6-A0WW-01A	TCGA-B6-A0WW-01A	10.6	MX	3	Dead	18.33	1
TCGA-B6-A0X7-01A	TCGA-B6-A0X7-01A	9.518	MX	3	Dead	58.51	1
TCGA-BH-A1F6-01A	TCGA-BH-A1F6-01A	9.844	MX	3	Dead	97.4	1
TCGA-D8-A146-01A	TCGA-D8-A146-01A	9.984	MX	3	Alive	21.12	0
TCGA-D8-A1JI-01A	TCGA-D8-A1JI-01A	11.53	MX	3	Alive	18.96	0
TCGA-D8-A1JN-01A	TCGA-D8-A1JN-01A	8.202	MX	3	Alive	20.37	0
TCGA-D8-A1X5-01A	TCGA-D8-A1X5-01A	6.968	MX	3	Alive	18.56	0
TCGA-D8-A1X6-01A	TCGA-D8-A1X6-01A	7.814	MX	3	Alive	17.77	0
TCGA-D8-A1X7-01A	TCGA-D8-A1X7-01A	8.879	MX	3	Alive	16.72	0
TCGA-D8-A1XJ-01A	TCGA-D8-A1XJ-01A	8.447	MX	3	Alive	21.81	0
TCGA-D8-A1XK-01A	TCGA-D8-A1XK-01A	10.96	MX	3	Alive	14.49	0
TCGA-D8-A1XL-01A	TCGA-D8-A1XL-01A	9.782	MX	3	Alive	19.91	0
TCGA-D8-A1XY-01A	TCGA-D8-A1XY-01A	9.06	MX	3	Alive	16.52	0
TCGA-D8-A1XZ-01A	TCGA-D8-A1XZ-01A	8.854	MX	3	Alive	15.31	0
TCGA-D8-A1Y0-01A	TCGA-D8-A1Y0-01A	10.76	MX	3	Alive	15.51	0
TCGA-D8-A1Y1-01A	TCGA-D8-A1Y1-01A	10.18	MX	3	Dead	9.92	1
TCGA-D8-A1Y2-01A	TCGA-D8-A1Y2-01A	10.9	MX	3	Alive	14.22	0
TCGA-D8-A1Y3-01A	TCGA-D8-A1Y3-01A	13.3	MX	3	Alive	14.13	0
TCGA-D8-A73W-01A	TCGA-D8-A73W-01A	9.675	MX	3	Dead	12.65	1
TCGA-E2-A1LL-01A	TCGA-E2-A1LL-01A	12.09	MX	3	Alive	43	0
TCGA-E2-A576-01A	TCGA-E2-A576-01A	10.22	MX	3	Alive	34.26	0
TCGA-E2-A9RU-01A	TCGA-E2-A9RU-01A	12.45	MX	3	Alive	17.67	0
TCGA-E9-A1R2-01A	TCGA-E9-A1R2-01A	11.72	MX	3	Alive	34.92	0
TCGA-E9-A6HE-01A	TCGA-E9-A6HE-01A	10.73	MX	3	Alive	27.83	0
TCGA-EW-A1IW-01A	TCGA-EW-A1IW-01A	12.78	MX	3	Alive	12.19	0
TCGA-EW-A1IX-01A	TCGA-EW-A1IX-01A	10.94	MX	3	Alive	39.68	0
TCGA-EW-A1IY-01A	TCGA-EW-A1IY-01A	13.26	MX	3	Alive	8.48	0
TCGA-EW-A1IZ-01A	TCGA-EW-A1IZ-01A	11.11	MX	3	Alive	18.2	0
TCGA-EW-A1J2-01A	TCGA-EW-A1J2-01A	9.733	MX	3	Alive	13.24	0
TCGA-EW-A1OV-01A	TCGA-EW-A1OV-01A	10.31	MX	3	Alive	25.92	0
TCGA-EW-A1OW-01A	TCGA-EW-A1OW-01A	8.621	MX	3	Alive	22.8	0
TCGA-EW-A1OX-01A	TCGA-EW-A1OX-01A	7.955	MX	3	Alive	29.93	0
TCGA-EW-A1OY-01A	TCGA-EW-A1OY-01A	8.735	MX	3	Alive	29.83	0
TCGA-EW-A1P0-01A	TCGA-EW-A1P0-01A	10.15	MX	3	Alive	41.1	0
TCGA-EW-A1P1-01A	TCGA-EW-A1P1-01A	10.43	MX	3	Alive	39.75	0
TCGA-EW-A1P3-01A	TCGA-EW-A1P3-01A	9.239	MX	3	Alive	52.92	0
TCGA-EW-A1PB-01A	TCGA-EW-A1PB-01A	13.39	MX	3	Alive	19.97	0
TCGA-EW-A1PC-01B	TCGA-EW-A1PC-01B	10.72	MX	3	Alive	6.14	0
TCGA-EW-A1PG-01A	TCGA-EW-A1PG-01A	8.836	MX	3	Alive	34.53	0
TCGA-EW-A2FR-01A	TCGA-EW-A2FR-01A	10.15	MX	3	Alive	54.96	0
TCGA-EW-A2FS-01A	TCGA-EW-A2FS-01A	10.2	MX	3	Alive	52.69	0
TCGA-EW-A2FV-01A	TCGA-EW-A2FV-01A	9.863	MX	3	Alive	25.89	0
TCGA-EW-A2FW-01A	TCGA-EW-A2FW-01A	8.719	MX	3	Alive	22.08	0
TCGA-EW-A3E8-01B	TCGA-EW-A3E8-01B	10.42	MX	3	Alive	34	0
TCGA-EW-A423-01A	TCGA-EW-A423-01A	9.341	MX	3	Alive	17.51	0
TCGA-EW-A424-01A	TCGA-EW-A424-01A	10.15	MX	3	Alive	23.49	0
TCGA-EW-A6SA-01A	TCGA-EW-A6SA-01A	10.72	MX	3	Alive	16.75	0
TCGA-GI-A2C8-01A	TCGA-GI-A2C8-01A	9.938	MX	3	Alive	7.39	0
TCGA-GI-A2C9-01A	TCGA-GI-A2C9-01A	11.49	MX	3	Alive	109.79	0
TCGA-LD-A66U-01A	TCGA-LD-A66U-01A	11.37	MX	3	Alive	21.22	0
TCGA-LL-A440-01A	TCGA-LL-A440-01A	11.44	MX	3	Alive	24.93	0
TCGA-LL-A441-01A	TCGA-LL-A441-01A	12.1	MX	3	Alive	32.72	0
TCGA-LL-A442-01A	TCGA-LL-A442-01A	8.236	MX	3	Alive	29.2	0
TCGA-LL-A50Y-01A	TCGA-LL-A50Y-01A	9.6	MX	3	Alive	25.03	0
TCGA-LL-A5YL-01A	TCGA-LL-A5YL-01A	10.14	MX	3	Alive	17.05	0
TCGA-LL-A5YO-01A	TCGA-LL-A5YO-01A	11.89	MX	3	Alive	14.45	0
TCGA-LL-A6FP-01A	TCGA-LL-A6FP-01A	8.679	MX	3	Alive	22.24	0
TCGA-LL-A6FQ-01A	TCGA-LL-A6FQ-01A	9.475	MX	3	Alive	2.63	0
TCGA-LL-A6FR-01A	TCGA-LL-A6FR-01A	9.888	MX	3	Alive	16.06	0
TCGA-LL-A73Y-01A	TCGA-LL-A73Y-01A	11.16	MX	3	Alive	15.67	0
TCGA-LL-A740-01A	TCGA-LL-A740-01A	9.638	MX	3	Alive	14.49	0
TCGA-LL-A7SZ-01A	TCGA-LL-A7SZ-01A	11.62	MX	3	Alive	19.51	0
TCGA-LL-A8F5-01A	TCGA-LL-A8F5-01A	9.23	MX	3	Alive	19.58	0
TCGA-LL-A9Q3-01A	TCGA-LL-A9Q3-01A	10.75	MX	3	Alive	17.48	0
TCGA-LQ-A4E4-01A	TCGA-LQ-A4E4-01A	9.089	MX	3	Alive	27.89	0
TCGA-OK-A5Q2-01A	TCGA-OK-A5Q2-01A	10.84	MX	3	Alive	2.1	0
TCGA-OL-A5D6-01A	TCGA-OL-A5D6-01A	9.968	MX	3	Dead	36.27	1
TCGA-OL-A5D7-01A	TCGA-OL-A5D7-01A	15.73	MX	3	Alive	58.48	0
TCGA-OL-A5D8-01A	TCGA-OL-A5D8-01A	10.98	MX	3	Alive	31.96	0
TCGA-OL-A5DA-01A	TCGA-OL-A5DA-01A	10.41	MX	3	Alive	58.57	0
TCGA-OL-A5RU-01A	TCGA-OL-A5RU-01A	11.32	MX	3	Alive	40.05	0
TCGA-OL-A5RV-01A	TCGA-OL-A5RV-01A	10.36	MX	3	Alive	34.89	0
TCGA-OL-A5RW-01A	TCGA-OL-A5RW-01A	10.34	MX	3	Alive	36.33	0
TCGA-OL-A5RX-01A	TCGA-OL-A5RX-01A	11.86	MX	3	Alive	28.84	0
TCGA-OL-A5RY-01A	TCGA-OL-A5RY-01A	12.49	MX	3	Alive	24.7	0
TCGA-OL-A5RZ-01A	TCGA-OL-A5RZ-01A	10.71	MX	3	Alive	22.31	0
TCGA-OL-A5S0-01A	TCGA-OL-A5S0-01A	10.8	MX	3	Alive	20.37	0
TCGA-OL-A66H-01A	TCGA-OL-A66H-01A	8.459	MX	3	Alive		0
TCGA-OL-A66I-01A	TCGA-OL-A66I-01A	15.97	MX	3	Alive	23.46	0
TCGA-OL-A66J-01A	TCGA-OL-A66J-01A	12.95	MX	3	Alive	65.57	0
TCGA-OL-A66K-01A	TCGA-OL-A66K-01A	8.387	MX	3	Dead	41.89	1
TCGA-OL-A66L-01A	TCGA-OL-A66L-01A	10.11	MX	3	Alive	42.74	0
TCGA-OL-A66N-01A	TCGA-OL-A66N-01A	9.523	MX	3	Alive	26.02	0
TCGA-OL-A66O-01A	TCGA-OL-A66O-01A	10.34	MX	3	Alive	17.35	0
TCGA-OL-A66P-01A	TCGA-OL-A66P-01A	10.54	MX	3	Alive	14.06	0
TCGA-OL-A6VO-01A	TCGA-OL-A6VO-01A	10.12	MX	3	Alive	28.19	0
TCGA-OL-A6VQ-01A	TCGA-OL-A6VQ-01A	11.77	MX	3	Alive	19.71	0
TCGA-OL-A6VR-01A	TCGA-OL-A6VR-01A	10.61	MX	3	Alive	40.08	0
TCGA-S3-A6ZH-01A	TCGA-S3-A6ZH-01A	10.89	MX	3	Alive	21.06	0
TCGA-S3-AA12-01A	TCGA-S3-AA12-01A	11.37	MX	3	Alive	18.86	0
TCGA-UL-AAZ6-01A	TCGA-UL-AAZ6-01A	9.983	MX	3	Alive	17.02	0
TCGA-W8-A86G-01A	TCGA-W8-A86G-01A	9.99	MX	3	Alive	11.4	0
TCGA-WT-AB41-01A	TCGA-WT-AB41-01A	13.13	MX	3	Alive	52.92	0
TCGA-WT-AB44-01A	TCGA-WT-AB44-01A	9.503	MX	3	Alive	29.01	0
TCGA-XX-A899-01A	TCGA-XX-A899-01A	11.85	MX	3	Alive	15.34	0
TCGA-XX-A89A-01A	TCGA-XX-A89A-01A	9.987	MX	3	Alive	16.03	0
TCGA-Z7-A8R5-01A	TCGA-Z7-A8R5-01A	11.6	MX	3	Alive	107.98	0
TCGA-BH-A0B2-01A	TCGA-BH-A0B2-01A	12.8
Total 1283; out of which
179 samples are
duplicated;
Out of this duplication
6 samples - triplicated
173 samples -duplicated
6 x 2 =12
173 x 1 = 173
Total 185
1283-185=1098 (TCGA)
Duplicates Removed
Xena Star Values
Cbioportal-rest

## Sheet: Meta-OS-04-12-19-Low-25%
sample	sample	Star (fkpm+uq+1)	American Joint Committee on Cancer Metastasis Stage Code	M0=1; M1=2; MX=3	Patient's Vital Status	Overall Survival (Months)	Alive=0; Dead=1
TCGA-A2-A04R-01A	TCGA-A2-A04R-01A	0	M0	1	Alive	121.85	0
TCGA-A2-A0YJ-01A	TCGA-A2-A0YJ-01A	0	M0	1	Alive	18.59	0
TCGA-A8-A06R-01A	TCGA-A8-A06R-01A	0	M0	1	Alive	17.97	0
TCGA-A8-A07B-01A	TCGA-A8-A07B-01A	0	M0	1	Alive	42.97	0
TCGA-AN-A03X-01A	TCGA-AN-A03X-01A	0	M0	1	Alive	0.33	0
TCGA-AO-A03P-01A	TCGA-AO-A03P-01A	0	M0	1	Dead	95.63	1
TCGA-AO-A126-01A	TCGA-AO-A126-01A	0	M0	1	Alive	108.64	0
TCGA-BH-A0HL-01A	TCGA-BH-A0HL-01A	0	M0	1	Alive	2.37	0
TCGA-BH-A18G-01A	TCGA-BH-A18G-01A	0	M0	1	Alive	4.89	0
TCGA-C8-A12M-01A	TCGA-C8-A12M-01A	0	M0	1	Alive	11.76	0
TCGA-C8-A12P-01A	TCGA-C8-A12P-01A	0	M0	1	Alive	11.76	0
TCGA-C8-A135-01A	TCGA-C8-A135-01A	0	M0	1	Alive	12.91	0
TCGA-C8-A137-01A	TCGA-C8-A137-01A	0	M0	1	Alive	12.45	0
TCGA-D8-A1XR-01A	TCGA-D8-A1XR-01A	0	M0	1	Alive	15.83	0
TCGA-E9-A226-01A	TCGA-E9-A226-01A	0	M0	1	Dead	34.43	1
TCGA-LL-A5YM-01A	TCGA-LL-A5YM-01A	0	M0	1	Alive	15.31	0
TCGA-A8-A09T-01A	TCGA-A8-A09T-01A	0	MX	3	Alive	19.02	0
TCGA-AQ-A1H2-01A	TCGA-AQ-A1H2-01A	6.191	MX	3	Alive	15.6	0
TCGA-AR-A24S-01A	TCGA-AR-A24S-01A	6.35	M0	1	Alive	97.77	0
TCGA-A1-A0SK-01A	TCGA-A1-A0SK-01A	12.23	M0	1	Dead	31.77	1
TCGA-AN-A0G0-01A	TCGA-AN-A0G0-01A	6.4	M0	1	Alive	0.53	0
TCGA-E2-A15A-01A	TCGA-E2-A15A-01A	6.452	M0	1	Alive	23.32	0
TCGA-BH-A0HU-01A	TCGA-BH-A0HU-01A	6.555	M0	1	Alive	12.88	0
TCGA-A2-A0T0-01A	TCGA-A2-A0T0-01A	6.558	M0	1	Alive	17.51	0
TCGA-E2-A152-01A	TCGA-E2-A152-01A	6.811	M0	1	Alive	69.91	0
TCGA-A2-A1FZ-01A	TCGA-A2-A1FZ-01A	6.812	M0	1	Alive	22.44	0
TCGA-AO-A12G-01A	TCGA-AO-A12G-01A	6.854	M0	1	Alive	53.84	0
TCGA-E9-A5UO-01A	TCGA-E9-A5UO-01A	6.883	M0	1	Alive	25.79	0
TCGA-A8-A06Y-01A	TCGA-A8-A06Y-01A	6.892	M0	1	Alive	25.99	0
TCGA-A7-A0CH-01A	TCGA-A7-A0CH-01A	6.915	M0	1	Alive	35.45	0
TCGA-E9-A1N9-01A	TCGA-E9-A1N9-01A	6.96	M0	1	Alive	36.17	0
TCGA-AO-A12B-01A	TCGA-AO-A12B-01A	6.966	M0	1	Alive	98.19	0
TCGA-D8-A1X5-01A	TCGA-D8-A1X5-01A	6.968	MX	3	Alive	18.56	0
TCGA-A8-A0AD-01A	TCGA-A8-A0AD-01A	6.971	M0	1	Alive	38.01	0
TCGA-A8-A09W-01A	TCGA-A8-A09W-01A	6.976	M0	1	Alive	0.99	0
TCGA-C8-A12T-01A	TCGA-C8-A12T-01A	7.01	M0	1	Alive	0	0
TCGA-A2-A0CO-01A	TCGA-A2-A0CO-01A	11.98	M0	1	Dead	114.72	1
TCGA-E2-A1LB-01A	TCGA-E2-A1LB-01A	7.025	M0	1	Alive	75.76	0
TCGA-AR-A1AS-01A	TCGA-AR-A1AS-01A	7.05	M0	1	Alive	37.78	0
TCGA-AR-A2LE-01A	TCGA-AR-A2LE-01A	7.068	M0	1	Alive	166.29	0
TCGA-D8-A1JK-01A	TCGA-D8-A1JK-01A	7.075	M0	1	Alive	20.11	0
TCGA-A2-A0CU-01A	TCGA-A2-A0CU-01A	11.14	M0	1	Dead	5.19	1
TCGA-B6-A1KF-01A	TCGA-B6-A1KF-01A	7.097	M0	1	Alive	101.45	0
TCGA-D8-A27W-01A	TCGA-D8-A27W-01A	7.099	M0	1	Alive	12.25	0
TCGA-AR-A24M-01A	TCGA-AR-A24M-01A	7.139	M0	1	Alive	120.24	0
TCGA-A8-A099-01A	TCGA-A8-A099-01A	7.331	MX	3	Alive	9.99	0
TCGA-D8-A1XW-01A	TCGA-D8-A1XW-01A	7.335	M0	1	Alive	43	0
TCGA-D8-A1JE-01A	TCGA-D8-A1JE-01A	7.337	M0	1	Alive	18.89	0
TCGA-A7-A4SF-01A	TCGA-A7-A4SF-01A	7.341	M0	1	Alive	17.9	0
TCGA-BH-A0E7-01A	TCGA-BH-A0E7-01A	7.341	M0	1	Alive	44.78	0
TCGA-A8-A092-01A	TCGA-A8-A092-01A	7.342	M0	1	Alive	30.95	0
TCGA-AO-A0JL-01A	TCGA-AO-A0JL-01A	7.412	M0	1	Alive	55.29	0
TCGA-AR-A24T-01A	TCGA-AR-A24T-01A	7.456	M0	1	Alive	105.19	0
TCGA-A2-A0YE-01A	TCGA-A2-A0YE-01A	7.487	M0	1	Alive	18.2	0
TCGA-A1-A0SN-01A	TCGA-A1-A0SN-01A	7.504	MX	3	Alive	39.29	0
TCGA-E2-A14V-01A	TCGA-E2-A14V-01A	7.525	M0	1	Alive	34.23	0
TCGA-E9-A1RF-01A	TCGA-E9-A1RF-01A	7.553	M0	1	Alive	6.57	0
TCGA-A2-A25B-01A	TCGA-A2-A25B-01A	7.571	M0	1	Alive	42.41	0
TCGA-A2-A3KC-01A	TCGA-A2-A3KC-01A	7.598	M0	1	Alive	36.2	0
TCGA-AN-A04A-01A	TCGA-AN-A04A-01A	7.629	M0	1	Alive	2.96	0
TCGA-AN-A04C-01A	TCGA-AN-A04C-01A	7.632	M0	1	Alive	1.77	0
TCGA-AN-A0AR-01A	TCGA-AN-A0AR-01A	7.632	M0	1	Alive	0.33	0
TCGA-D8-A1JD-01A	TCGA-D8-A1JD-01A	7.661	M0	1	Alive	18.13	0
TCGA-A8-A08A-01A	TCGA-A8-A08A-01A	7.664	M0	1	Alive	0.99	0
TCGA-AR-A0TV-01A	TCGA-AR-A0TV-01A	7.664	M0	1	Alive	75.16	0
TCGA-E9-A22E-01A	TCGA-E9-A22E-01A	7.681	M0	1	Alive	41.69	0
TCGA-AN-A0FK-01A	TCGA-AN-A0FK-01A	7.733	M0	1	Alive	7	0
TCGA-A2-A0CK-01A	TCGA-A2-A0CK-01A	7.773	M0	1	Alive	136.63	0
TCGA-A7-A3J0-01A	TCGA-A7-A3J0-01A	7.775	M0	1	Alive	10.28	0
TCGA-A8-A09E-01A	TCGA-A8-A09E-01A	7.785	M0	1	Alive	49.01	0
TCGA-BH-A0BV-01A	TCGA-BH-A0BV-01A	7.787	M0	1	Alive	49.9	0
TCGA-D8-A1X6-01A	TCGA-D8-A1X6-01A	7.814	MX	3	Alive	17.77	0
TCGA-E2-A15G-01A	TCGA-E2-A15G-01A	7.817	M0	1	Alive	18.2	0
TCGA-A1-A0SQ-01A	TCGA-A1-A0SQ-01A	7.824	MX	3	Alive	18.2	0
TCGA-AR-A254-01A	TCGA-AR-A254-01A	7.856	M0	1	Alive	85.58	0
TCGA-A2-A0ET-01A	TCGA-A2-A0ET-01A	7.871	M0	1	Alive	35.02	0
TCGA-A8-A0A9-01A	TCGA-A8-A0A9-01A	7.896	M0	1	Alive	27	0
TCGA-BH-A0HO-01A	TCGA-BH-A0HO-01A	7.91	M0	1	Alive	2.5	0
TCGA-E2-A155-01A	TCGA-E2-A155-01A	7.914	M0	1	Alive	21.02	0
TCGA-B6-A0RP-01A	TCGA-B6-A0RP-01A	7.918	M0	1	Dead	102.69	1
TCGA-C8-A12Y-01A	TCGA-C8-A12Y-01A	7.923	M0	1	Alive	48.49	0
TCGA-AR-A24Q-01A	TCGA-AR-A24Q-01A	7.924	M0	1	Alive	104.2	0
TCGA-D8-A1XQ-01A	TCGA-D8-A1XQ-01A	7.929	M0	1	Alive	16.39	0
TCGA-A2-A0D0-01A	TCGA-A2-A0D0-01A	7.938	M0	1	Alive	67.28	0
TCGA-D8-A1JJ-01A	TCGA-D8-A1JJ-01A	7.948	M0	1	Alive	20.07	0
TCGA-EW-A1OX-01A	TCGA-EW-A1OX-01A	7.955	MX	3	Alive	29.93	0
TCGA-A2-A4S1-01A	TCGA-A2-A4S1-01A	7.962	M0	1	Alive	26.94	0
TCGA-A2-A0YT-01A	TCGA-A2-A0YT-01A	9.585	M0	1	Dead	23.75	1
TCGA-E2-A10E-01A	TCGA-E2-A10E-01A	7.987	M0	1	Alive	28.42	0
TCGA-D8-A27G-01A	TCGA-D8-A27G-01A	7.992	M0	1	Alive	13.44	0
TCGA-A8-A07J-01A	TCGA-A8-A07J-01A	8.025	M0	1	Alive	11.99	0
TCGA-E2-A15L-01A	TCGA-E2-A15L-01A	8.047	M0	1	Alive	20.57	0
TCGA-E9-A1R5-01A	TCGA-E9-A1R5-01A	8.052	M0	1	Alive	3.02	0
TCGA-BH-A5J0-01A	TCGA-BH-A5J0-01A	8.059	M0	1	Alive	23.49	0
TCGA-AN-A041-01A	TCGA-AN-A041-01A	8.099	M0	1	Alive	0.23	0
TCGA-C8-A131-01A	TCGA-C8-A131-01A	8.11	M0	1	Alive	13.5	0
TCGA-C8-A12Z-01A	TCGA-C8-A12Z-01A	8.112	M0	1	Alive	12.55	0
TCGA-BH-A0C1-01B	TCGA-BH-A0C1-01B	8.117	M0	1	Dead	46.35	1
TCGA-A8-A06Z-01A	TCGA-A8-A06Z-01A	8.13	M0	1	Alive	1.02	0
TCGA-AC-A3YJ-01A	TCGA-AC-A3YJ-01A	8.131	MX	3	Alive	24.77	0
TCGA-AR-A24X-01A	TCGA-AR-A24X-01A	8.132	M0	1	Alive	98.69	0
TCGA-AN-A0XU-01A	TCGA-AN-A0XU-01A	8.134	M0	1	Alive	0.33	0
TCGA-A2-A3XV-01A	TCGA-A2-A3XV-01A	8.135	M0	1	Alive	32.72	0
TCGA-AN-A0XP-01A	TCGA-AN-A0XP-01A	8.141	M0	1	Alive	0.3	0
TCGA-A8-A07S-01A	TCGA-A8-A07S-01A	8.155	M0	1	Alive	7.98	0
TCGA-BH-A0WA-01A	TCGA-BH-A0WA-01A	8.157	M0	1	Alive	23.03	0
TCGA-BH-A6R8-01A	TCGA-BH-A6R8-01A	8.172	M0	1	Alive	9.63	0
TCGA-A8-A079-01A	TCGA-A8-A079-01A	8.179	M0	1	Alive	9	0
TCGA-AR-A2LL-01A	TCGA-AR-A2LL-01A	8.189	M0	1	Alive	66.1	0
TCGA-GM-A2DA-01A	TCGA-GM-A2DA-01A	8.19	M0	1	Dead	216.59	1
TCGA-A2-A3XX-01A	TCGA-A2-A3XX-01A	8.593	M0	1	Dead	47.27	1
TCGA-A8-A07P-01A	TCGA-A8-A07P-01A	8.196	M0	1	Alive	10.97	0
TCGA-D8-A1JN-01A	TCGA-D8-A1JN-01A	8.202	MX	3	Alive	20.37	0
TCGA-AC-A8OR-01A	TCGA-AC-A8OR-01A	8.204	MX	3	Alive	1.31	0
TCGA-A8-A096-01A	TCGA-A8-A096-01A	8.209	M0	1	Alive	0	0
TCGA-A2-A4S0-01A	TCGA-A2-A4S0-01A	8.231	M0	1	Alive	23.19	0
TCGA-C8-A274-01A	TCGA-C8-A274-01A	8.231	M0	1	Alive	16.69	0
TCGA-LL-A442-01A	TCGA-LL-A442-01A	8.236	MX	3	Alive	29.2	0
TCGA-BH-A0H0-01A	TCGA-BH-A0H0-01A	8.241	M0	1	Alive	15.14	0
TCGA-Z7-A8R6-01A	TCGA-Z7-A8R6-01A	8.243	M0	1	Alive	106.96	0
TCGA-AR-A0TP-01A	TCGA-AR-A0TP-01A	8.259	M0	1	Alive	140.44	0
TCGA-A8-A09R-01A	TCGA-A8-A09R-01A	8.295	M0	1	Alive	8.97	0
TCGA-AO-A125-01A	TCGA-AO-A125-01A	8.302	M0	1	Alive	113.53	0
TCGA-E2-A15K-01A	TCGA-E2-A15K-01A	8.316	M0	1	Alive	9.03	0
TCGA-A8-A085-01A	TCGA-A8-A085-01A	8.34	M0	1	Alive	36.93	0
TCGA-AR-A24K-01A	TCGA-AR-A24K-01A	8.341	M0	1	Alive	50.85	0
TCGA-AR-A1AV-01A	TCGA-AR-A1AV-01A	8.342	M0	1	Alive	61.24	0
TCGA-B6-A402-01A	TCGA-B6-A402-01A	8.345	M0	1	Alive	74.93	0
TCGA-D8-A140-01A	TCGA-D8-A140-01A	8.346	M0	1	Alive	13.24	0
TCGA-BH-A0DH-01A	TCGA-BH-A0DH-01A	8.358	M0	1	Alive	37.98	0
TCGA-E9-A24A-01A	TCGA-E9-A24A-01A	8.363	M0	1	Alive	24.54	0
TCGA-C8-A12L-01A	TCGA-C8-A12L-01A	8.371	M0	1	Alive	11.93	0
TCGA-D8-A1JU-01A	TCGA-D8-A1JU-01A	8.403	M0	1	Alive	14.68	0
TCGA-AQ-A04H-01B	TCGA-AQ-A04H-01B	8.39	MX	3	Alive	24.77	0
TCGA-A8-A07R-01A	TCGA-A8-A07R-01A	8.411	M0	1	Alive	8.97	0
TCGA-AO-A03U-01B	TCGA-AO-A03U-01B	8.436	M0	1	Dead	58.9	1
TCGA-A2-A25C-01A	TCGA-A2-A25C-01A	8.451	M0	1	Alive	17.18	0
TCGA-D8-A1XJ-01A	TCGA-D8-A1XJ-01A	8.447	MX	3	Alive	21.81	0
TCGA-E2-A1LE-01A	TCGA-E2-A1LE-01A	8.452	M0	1	Dead	28.88	1
TCGA-A1-A0SM-01A	TCGA-A1-A0SM-01A	8.455	M0	1	Alive	7.95	0
TCGA-AC-A5EH-01A	TCGA-AC-A5EH-01A	8.452	MX	3	Alive	16.79	0
TCGA-C8-A1HI-01A	TCGA-C8-A1HI-01A	8.46	M0	1	Alive	11.27	0
TCGA-B6-A0RS-01A	TCGA-B6-A0RS-01A	8.463	M0	1	Dead	100.62	1
TCGA-A2-A1FX-01A	TCGA-A2-A1FX-01A	8.469	M0	1	Alive	60.68	0
TCGA-A7-A26G-01A	TCGA-A7-A26G-01A	8.492	M0	1	Alive	23.72	0
TCGA-4H-AAAK-01A	TCGA-4H-AAAK-01A	8.495	M0	1	Alive	11.43	0
TCGA-E9-A1RH-01A	TCGA-E9-A1RH-01A	8.502	M0	1	Alive	46.55	0
TCGA-AO-A12H-01A	TCGA-AO-A12H-01A	8.51	M0	1	Alive	40.54	0
TCGA-AO-A03L-01A	TCGA-AO-A03L-01A	8.531	M0	1	Alive	80.22	0
TCGA-A8-A07F-01A	TCGA-A8-A07F-01A	8.535	M0	1	Alive	18.96	0
TCGA-D8-A13Y-01A	TCGA-D8-A13Y-01A	8.547	M0	1	Alive	56.77	0
TCGA-A8-A09B-01A	TCGA-A8-A09B-01A	8.553	M0	1	Alive	11.99	0
TCGA-D8-A1XO-01A	TCGA-D8-A1XO-01A	8.565	M0	1	Alive	55.26	0
TCGA-AR-A1AH-01A	TCGA-AR-A1AH-01A	8.566	M0	1	Alive	125.07	0
TCGA-D8-A1JA-01A	TCGA-D8-A1JA-01A	8.581	M0	1	Alive	16.49	0
TCGA-AN-A0AS-01A	TCGA-AN-A0AS-01A	8.587	M0	1	Alive	0.33	0
TCGA-A1-A0SO-01A	TCGA-A1-A0SO-01A	8.607	M0	1	Alive	27.99	0
TCGA-AR-A1AN-01A	TCGA-AR-A1AN-01A	8.612	M0	1	Alive	95.93	0
TCGA-A8-A06U-01A	TCGA-A8-A06U-01A	9.584	M0	1	Dead	29.01	1
TCGA-A8-A06X-01A	TCGA-A8-A06X-01A	8.771	M0	1	Dead	30.98	1
TCGA-AR-A0TW-01A	TCGA-AR-A0TW-01A	8.624	M0	1	Alive	98.85	0
TCGA-D8-A27E-01A	TCGA-D8-A27E-01A	8.664	M0	1	Alive	17.41	0
TCGA-EW-A1OW-01A	TCGA-EW-A1OW-01A	8.621	MX	3	Alive	22.8	0
TCGA-BH-A0BJ-01A	TCGA-BH-A0BJ-01A	8.668	M0	1	Alive	21.68	0
TCGA-GM-A2DL-01A	TCGA-GM-A2DL-01A	8.673	M0	1	Alive	115.6	0
TCGA-AN-A0FS-01A	TCGA-AN-A0FS-01A	8.684	M0	1	Alive	6.9	0
TCGA-A2-A04Y-01A	TCGA-A2-A04Y-01A	8.716	M0	1	Alive	36.1	0
TCGA-E2-A156-01A	TCGA-E2-A156-01A	8.718	M0	1	Alive	23.85	0
TCGA-LL-A6FP-01A	TCGA-LL-A6FP-01A	8.679	MX	3	Alive	22.24	0
TCGA-E9-A1R4-01A	TCGA-E9-A1R4-01A	8.723	M0	1	Alive	6.11	0
TCGA-AN-A0XW-01A	TCGA-AN-A0XW-01A	8.73	M0	1	Alive	5.58	0
TCGA-EW-A1P5-01A	TCGA-EW-A1P5-01A	8.736	M0	1	Alive	23.09	0
TCGA-EW-A2FW-01A	TCGA-EW-A2FW-01A	8.719	MX	3	Alive	22.08	0
TCGA-BH-A0BZ-01A	TCGA-BH-A0BZ-01A	8.741	M0	1	Alive	74.08	0
TCGA-AN-A0FY-01A	TCGA-AN-A0FY-01A	8.758	M0	1	Alive	0.33	0
TCGA-EW-A1OY-01A	TCGA-EW-A1OY-01A	8.735	MX	3	Alive	29.83	0
TCGA-E9-A3Q9-01A	TCGA-E9-A3Q9-01A	8.759	M0	1	Alive	32.88	0
TCGA-A7-A56D-01A	TCGA-A7-A56D-01A	8.763	M0	1	Alive	14.72	0
TCGA-A2-A0YL-01A	TCGA-A2-A0YL-01A	8.789	M0	1	Alive	48.42	0
TCGA-E2-A2P6-01A	TCGA-E2-A2P6-01A	8.792	M0	1	Alive	34.53	0
TCGA-E2-A1L8-01A	TCGA-E2-A1L8-01A	8.801	M0	1	Alive	73.59	0
TCGA-C8-A1HL-01A	TCGA-C8-A1HL-01A	8.805	M0	1	Alive	10.41	0
TCGA-D8-A1XV-01A	TCGA-D8-A1XV-01A	8.814	M0	1	Alive	15.14	0
TCGA-EW-A6SC-01A	TCGA-EW-A6SC-01A	8.826	M0	1	Alive	31.27	0
TCGA-A1-A0SD-01A	TCGA-A1-A0SD-01A	8.833	M0	1	Alive	14.36	0
TCGA-D8-A3Z6-01A	TCGA-D8-A3Z6-01A	8.839	M0	1	Alive	18.5	0
TCGA-B6-A0I1-01A	TCGA-B6-A0I1-01A	8.84	M0	1	Dead	77.56	1
TCGA-A8-A08P-01A	TCGA-A8-A08P-01A	8.844	M0	1	Alive	30.98	0
TCGA-EW-A1PG-01A	TCGA-EW-A1PG-01A	8.836	MX	3	Alive	34.53	0
TCGA-A8-A08L-01A	TCGA-A8-A08L-01A	11.42	M0	1	Dead	9.99	1
TCGA-B6-A0IA-01A	TCGA-B6-A0IA-01A	8.861	M0	1	Alive	275.66	0
TCGA-E9-A1R3-01A	TCGA-E9-A1R3-01A	8.866	M0	1	Alive	2.56	0
TCGA-A2-A04W-01A	TCGA-A2-A04W-01A	8.881	M0	1	Alive	101.91	0
TCGA-AN-A0XR-01A	TCGA-AN-A0XR-01A	8.889	M0	1	Alive	0.33	0
TCGA-D8-A1XZ-01A	TCGA-D8-A1XZ-01A	8.854	MX	3	Alive	15.31	0
TCGA-A7-A6VY-01A	TCGA-A7-A6VY-01A	8.9	M0	1	Alive	8.74	0
TCGA-A7-A4SE-01A	TCGA-A7-A4SE-01A	8.902	M0	1	Alive	21.16	0
TCGA-D8-A1X7-01A	TCGA-D8-A1X7-01A	8.879	MX	3	Alive	16.72	0
TCGA-B6-A0X4-01A	TCGA-B6-A0X4-01A	8.903	M0	1	Dead	28.25	1
TCGA-B6-A0IE-01A	TCGA-B6-A0IE-01A	8.913	M0	1	Dead	65.47	1
TCGA-A2-A0EV-01A	TCGA-A2-A0EV-01A	8.916	M0	1	Alive	31.8	0
TCGA-BH-A0DD-01A	TCGA-BH-A0DD-01A	8.917	M0	1	Alive	81.67	0
TCGA-A7-A0CD-01A	TCGA-A7-A0CD-01A	8.919	M0	1	Alive	38.27	0
TCGA-A2-A1FW-01A	TCGA-A2-A1FW-01A	8.923	M0	1	Alive	17.35	0
TCGA-A2-A3XU-01A	TCGA-A2-A3XU-01A	8.944	M0	1	Dead	29.96	1
TCGA-E2-A1LA-01A	TCGA-E2-A1LA-01A	8.945	M0	1	Alive	24.57	0
TCGA-E9-A1NF-01A	TCGA-E9-A1NF-01A	8.956	M0	1	Dead	35.22	1
TCGA-D8-A1JS-01A	TCGA-D8-A1JS-01A	8.958	M0	1	Alive	12.19	0
TCGA-E2-A15J-01A	TCGA-E2-A15J-01A	8.958	M0	1	Alive	53.88	0
TCGA-B6-A0I6-01A	TCGA-B6-A0I6-01A	8.967	M0	1	Dead	32.56	1
TCGA-B6-A0RU-01A	TCGA-B6-A0RU-01A	8.974	M0	1	Alive	282.69	0
TCGA-D8-A1XT-01A	TCGA-D8-A1XT-01A	8.981	M0	1	Alive	16.62	0
TCGA-D8-A73U-01A	TCGA-D8-A73U-01A	8.981	M0	1	Alive	16.16	0
TCGA-AR-A24V-01A	TCGA-AR-A24V-01A	8.982	M0	1	Alive	105.22	0
TCGA-A8-A075-01A	TCGA-A8-A075-01A	8.989	M0	1	Alive	17.02	0
TCGA-AR-A1AU-01A	TCGA-AR-A1AU-01A	8.993	M0	1	Alive	94.22	0
TCGA-A8-A09X-01A	TCGA-A8-A09X-01A	10.01	M0	1	Dead	13.99	1
TCGA-AN-A03Y-01A	TCGA-AN-A03Y-01A	8.999	M0	1	Alive	0.33	0
TCGA-C8-A1HE-01A	TCGA-C8-A1HE-01A	8.999	M0	1	Alive	12.32	0
TCGA-E2-A1L9-01A	TCGA-E2-A1L9-01A	9	M0	1	Alive	19.65	0
TCGA-E2-A106-01A	TCGA-E2-A106-01A	9.002	M0	1	Alive	83.48	0
TCGA-A2-A0D4-01A	TCGA-A2-A0D4-01A	9.003	M0	1	Alive	25.2	0
TCGA-A1-A0SJ-01A	TCGA-A1-A0SJ-01A	9.006	M0	1	Alive	13.67	0
TCGA-E2-A1LG-01A	TCGA-E2-A1LG-01A	9.013	M0	1	Alive	50.03	0
TCGA-AO-A0JF-01A	TCGA-AO-A0JF-01A	9.034	M0	1	Alive	65.05	0
TCGA-B6-A40C-01A	TCGA-B6-A40C-01A	9.035	M0	1	Alive	71.09	0
TCGA-AC-A23H-01A	TCGA-AC-A23H-01A	6.378	M0	1	Dead	5.72	1
TCGA-B6-A0I8-01A	TCGA-B6-A0I8-01A	9.038	M0	1	Dead	24.61	1
TCGA-BH-A0B8-01A	TCGA-BH-A0B8-01A	9.039	M0	1	Alive	51.54	0
TCGA-BH-A0BM-01A	TCGA-BH-A0BM-01A	9.039	M0	1	Alive	61.63	0
TCGA-BH-A0HP-01A	TCGA-BH-A0HP-01A	9.048	M0	1	Alive	13.6	0
TCGA-AC-A3EH-01A	TCGA-AC-A3EH-01A	12.31	M0	1	Dead	6.47	1
TCGA-AC-A2B8-01A	TCGA-AC-A2B8-01A	9.053	M0	1	Alive	22.24	0
TCGA-E9-A1RG-01A	TCGA-E9-A1RG-01A	9.059	M0	1	Alive	21.25	0
TCGA-A8-A09Q-01A	TCGA-A8-A09Q-01A	9.061	M0	1	Alive	25	0
TCGA-D8-A1X8-01A	TCGA-D8-A1X8-01A	9.062	M0	1	Alive	25.72	0
TCGA-B6-A0RI-01A	TCGA-B6-A0RI-01A	9.066	M0	1	Alive	234.1	0
TCGA-C8-A278-01A	TCGA-C8-A278-01A	9.066	M0	1	Alive	9.76	0
TCGA-D8-A1XY-01A	TCGA-D8-A1XY-01A	9.06	MX	3	Alive	16.52	0
TCGA-A2-A0T4-01A	TCGA-A2-A0T4-01A	9.086	M0	1	Alive	20.5	0
TCGA-E2-A14W-01A	TCGA-E2-A14W-01A	9.086	M0	1	Alive	32	0
TCGA-E2-A15E-01A	TCGA-E2-A15E-01A	9.086	M0	1	Alive	20.7	0
TCGA-A1-A0SE-01A	TCGA-A1-A0SE-01A	9.095	M0	1	Alive	43.4	0
TCGA-BH-A0EB-01A	TCGA-BH-A0EB-01A	9.095	M0	1	Alive	24.47	0
TCGA-A2-A0YC-01A	TCGA-A2-A0YC-01A	9.107	M0	1	Alive	32.52	0
TCGA-E9-A1RD-01A	TCGA-E9-A1RD-01A	9.109	M0	1	Alive	1.12	0
TCGA-LQ-A4E4-01A	TCGA-LQ-A4E4-01A	9.089	MX	3	Alive	27.89	0
TCGA-AO-A12F-01A	TCGA-AO-A12F-01A	9.113	M0	1	Alive	60.51	0
TCGA-AR-A0TZ-01A	TCGA-AR-A0TZ-01A	8.365	M1	2	Dead	107.16	1
TCGA-B6-A0IB-01A	TCGA-B6-A0IB-01A	8.54	M1	2	Dead	129.47	1
TCGA-PL-A8LX-01A	TCGA-PL-A8LX-01A	8.646	M1	2	Alive	0.16	0
TCGA-A8-A08O-01A	TCGA-A8-A08O-01A	8.84	M1	2	Alive	30.98	0
TCGA-AC-A23E-01A	TCGA-AC-A23E-01A	9.2	MX	3	Alive	22.93	0
TCGA-LL-A8F5-01A	TCGA-LL-A8F5-01A	9.23	MX	3	Alive	19.58	0
TCGA-EW-A1P3-01A	TCGA-EW-A1P3-01A	9.239	MX	3	Alive	52.92	0
TCGA-AC-A5XS-01A	TCGA-AC-A5XS-01A	9.336	MX	3	Alive	19.32	0
TCGA-EW-A423-01A	TCGA-EW-A423-01A	9.341	MX	3	Alive	17.51	0
TCGA-AC-A6IX-01A	TCGA-AC-A6IX-01A	9.433	MX	3	Alive	12.25	0
TCGA-A8-A07E-01A	TCGA-A8-A07E-01A	9.458	MX	3	Alive	19.97	0
TCGA-LL-A6FQ-01A	TCGA-LL-A6FQ-01A	9.475	MX	3	Alive	2.63	0
TCGA-WT-AB44-01A	TCGA-WT-AB44-01A	9.503	MX	3	Alive	29.01	0
TCGA-B6-A0X7-01A	TCGA-B6-A0X7-01A	9.518	MX	3	Dead	58.51	1
TCGA-AR-A0U1-01A	TCGA-AR-A0U1-01A		M0	1	Alive	133.11	0
TCGA-OL-A66N-01A	TCGA-OL-A66N-01A	9.523	MX	3	Alive	26.02	0
TCGA-AC-A5XU-01A	TCGA-AC-A5XU-01A	9.597	MX	3	Alive	14.95	0
TCGA-LL-A50Y-01A	TCGA-LL-A50Y-01A	9.6	MX	3	Alive	25.03	0
TCGA-AC-A3HN-01A	TCGA-AC-A3HN-01A	9.614	MX	3	Alive	16.29	0
TCGA-LL-A740-01A	TCGA-LL-A740-01A	9.638	MX	3	Alive	14.49	0
TCGA-D8-A73W-01A	TCGA-D8-A73W-01A	9.675	MX	3	Dead	12.65	1
TCGA-AC-A6IV-01A	TCGA-AC-A6IV-01A	9.716	MX	3	Alive	18.66	0
TCGA-AC-A3TN-01A	TCGA-AC-A3TN-01A	9.719	MX	3	Alive	14.98	0
TCGA-AC-A62X-01A	TCGA-AC-A62X-01A	9.725	MX	3	Alive	13.7	0
TCGA-EW-A1J2-01A	TCGA-EW-A1J2-01A	9.733	MX	3	Alive	13.24	0
TCGA-A7-A2KD-01A	TCGA-A7-A2KD-01A	9.749	MX	3	Alive	22.31	0
TCGA-D8-A1XL-01A	TCGA-D8-A1XL-01A	9.782	MX	3	Alive	19.91	0
TCGA-AC-A3W6-01A	TCGA-AC-A3W6-01A	9.836	MX	3	Alive	19.78	0
TCGA-AC-A2BK-01A	TCGA-AC-A2BK-01A	9.858	MX	3	Alive	73	0
TCGA-EW-A2FV-01A	TCGA-EW-A2FV-01A	9.863	MX	3	Alive	25.89	0
TCGA-AC-A23C-01A	TCGA-AC-A23C-01A	9.878	MX	3	Alive	19.22	0
TCGA-LL-A6FR-01A	TCGA-LL-A6FR-01A	9.888	MX	3	Alive	16.06	0
TCGA-GI-A2C8-01A	TCGA-GI-A2C8-01A	9.938	MX	3	Alive	7.39	0
TCGA-AC-A3W5-01A	TCGA-AC-A3W5-01A	9.942	MX	3	Alive	16.56	0
TCGA-UL-AAZ6-01A	TCGA-UL-AAZ6-01A	9.983	MX	3	Alive	17.02	0
TCGA-D8-A146-01A	TCGA-D8-A146-01A	9.984	MX	3	Alive	21.12	0
TCGA-XX-A89A-01A	TCGA-XX-A89A-01A	9.987	MX	3	Alive	16.03	0
TCGA-W8-A86G-01A	TCGA-W8-A86G-01A	9.99	MX	3	Alive	11.4	0
TCGA-AC-A3W7-01A	TCGA-AC-A3W7-01A	10.01	MX	3	Alive	15.47	0
TCGA-AC-A2FF-01A	TCGA-AC-A2FF-01A	10.11	MX	3	Alive	90.64	0
TCGA-OL-A66L-01A	TCGA-OL-A66L-01A	10.11	MX	3	Alive	42.74	0
TCGA-OL-A6VO-01A	TCGA-OL-A6VO-01A	10.12	MX	3	Alive	28.19	0
TCGA-AC-A62Y-01A	TCGA-AC-A62Y-01A	10.14	MX	3	Alive	17.41	0
TCGA-LL-A5YL-01A	TCGA-LL-A5YL-01A	10.14	MX	3	Alive	17.05	0
TCGA-EW-A1P0-01A	TCGA-EW-A1P0-01A	10.15	MX	3	Alive	41.1	0
TCGA-EW-A2FR-01A	TCGA-EW-A2FR-01A	10.15	MX	3	Alive	54.96	0
TCGA-EW-A424-01A	TCGA-EW-A424-01A	10.15	MX	3	Alive	23.49	0
TCGA-EW-A2FS-01A	TCGA-EW-A2FS-01A	10.2	MX	3	Alive	52.69	0
TCGA-E2-A576-01A	TCGA-E2-A576-01A	10.22	MX	3	Alive	34.26	0
TCGA-AC-A7VC-01A	TCGA-AC-A7VC-01A	10.31	MX	3	Alive	0.03	0
TCGA-EW-A1OV-01A	TCGA-EW-A1OV-01A	10.31	MX	3	Alive	25.92	0
TCGA-AC-A3QP-01A	TCGA-AC-A3QP-01A	10.34	MX	3	Alive	22.17	0
TCGA-OL-A5RW-01A	TCGA-OL-A5RW-01A	10.34	MX	3	Alive	36.33	0
TCGA-OL-A66O-01A	TCGA-OL-A66O-01A	10.34	MX	3	Alive	17.35	0
TCGA-OL-A5RV-01A	TCGA-OL-A5RV-01A	10.36	MX	3	Alive	34.89	0
TCGA-3C-AAAU-01A	TCGA-3C-AAAU-01A	10.37	MX	3	Alive	132.95	0
TCGA-AQ-A1H3-01A	TCGA-AQ-A1H3-01A	10.41	MX	3	Alive	32.49	0
TCGA-OL-A5DA-01A	TCGA-OL-A5DA-01A	10.41	MX	3	Alive	58.57	0
TCGA-EW-A3E8-01B	TCGA-EW-A3E8-01B	10.42	MX	3	Alive	34	0
TCGA-EW-A1P1-01A	TCGA-EW-A1P1-01A	10.43	MX	3	Alive	39.75	0
TCGA-AC-A2QI-01A	TCGA-AC-A2QI-01A	10.47	MX	3	Alive	19.32	0
TCGA-A7-A26E-01A	TCGA-A7-A26E-01A	10.48	MX	3	Alive	31.34	0
TCGA-C8-A9FZ-01A	TCGA-C8-A9FZ-01A		M0	1	Alive	19.45	0
TCGA-OL-A66P-01A	TCGA-OL-A66P-01A	10.54	MX	3	Alive	14.06	0
TCGA-A7-A3J1-01A	TCGA-A7-A3J1-01A	10.58	MX	3	Alive	11.27	0
TCGA-A7-A4SC-01A	TCGA-A7-A4SC-01A	10.6	MX	3	Alive	14.65	0
TCGA-B6-A0WW-01A	TCGA-B6-A0WW-01A	10.6	MX	3	Dead	18.33	1
TCGA-OL-A6VR-01A	TCGA-OL-A6VR-01A	10.61	MX	3	Alive	40.08	0
TCGA-AC-A3BB-01A	TCGA-AC-A3BB-01A	10.64	MX	3	Alive	32.42	0
TCGA-AC-A2FO-01A	TCGA-AC-A2FO-01A	10.66	MX	3	Alive	74.08	0
TCGA-OL-A5RZ-01A	TCGA-OL-A5RZ-01A	10.71	MX	3	Alive	22.31	0
TCGA-AC-A2FE-01A	TCGA-AC-A2FE-01A	10.72	MX	3	Dead	86.6	1
TCGA-EW-A1PC-01B	TCGA-EW-A1PC-01B	10.72	MX	3	Alive	6.14	0
TCGA-EW-A6SA-01A	TCGA-EW-A6SA-01A	10.72	MX	3	Alive	16.75	0
TCGA-E9-A6HE-01A	TCGA-E9-A6HE-01A	10.73	MX	3	Alive	27.83	0
TCGA-LL-A9Q3-01A	TCGA-LL-A9Q3-01A	10.75	MX	3	Alive	17.48	0
TCGA-D8-A1Y0-01A	TCGA-D8-A1Y0-01A	10.76	MX	3	Alive	15.51	0
TCGA-AQ-A04L-01B	TCGA-AQ-A04L-01B	10.79	MX	3	Alive	129.99	0
TCGA-A7-A425-01A	TCGA-A7-A425-01A	10.8	MX	3	Alive	14.68	0
TCGA-OL-A5S0-01A	TCGA-OL-A5S0-01A	10.8	MX	3	Alive	20.37	0
TCGA-E2-A14S-01A	TCGA-E2-A14S-01A		M0	1	Alive	33.15	0
TCGA-AC-A8OP-01A	TCGA-AC-A8OP-01A	10.83	MX	3	Alive	20.17	0
TCGA-OK-A5Q2-01A	TCGA-OK-A5Q2-01A	10.84	MX	3	Alive	2.1	0
TCGA-AC-A2QH-01B	TCGA-AC-A2QH-01B	10.85	MX	3	Alive	33.02	0
TCGA-S3-A6ZH-01A	TCGA-S3-A6ZH-01A	10.89	MX	3	Alive	21.06	0
TCGA-AR-A2LJ-01A	TCGA-AR-A2LJ-01A	10.9	MX	3	Alive	86.47	0
TCGA-D8-A1Y2-01A	TCGA-D8-A1Y2-01A	10.9	MX	3	Alive	14.22	0
TCGA-EW-A1IX-01A	TCGA-EW-A1IX-01A	10.94	MX	3	Alive	39.68	0
TCGA-A7-A426-01A	TCGA-A7-A426-01A	10.96	MX	3	Alive	11.96	0
TCGA-D8-A1XK-01A	TCGA-D8-A1XK-01A	10.96	MX	3	Alive	14.49	0
TCGA-AC-A8OQ-01A	TCGA-AC-A8OQ-01A	10.98	MX	3	Alive	1.12	0
TCGA-OL-A5D8-01A	TCGA-OL-A5D8-01A	10.98	MX	3	Alive	31.96	0
TCGA-EW-A1IZ-01A	TCGA-EW-A1IZ-01A	11.11	MX	3	Alive	18.2	0
TCGA-LL-A73Y-01A	TCGA-LL-A73Y-01A	11.16	MX	3	Alive	15.67	0
TCGA-AC-A2FB-01A	TCGA-AC-A2FB-01A	11.18	MX	3	Alive	40.54	0
TCGA-AC-A8OS-01A	TCGA-AC-A8OS-01A	11.2	MX	3	Alive	2.3	0
TCGA-AC-A23G-01A	TCGA-AC-A23G-01A	11.29	MX	3	Alive	73.85	0
TCGA-OL-A5RU-01A	TCGA-OL-A5RU-01A	11.32	MX	3	Alive	40.05	0
TCGA-E9-A245-01A	TCGA-E9-A245-01A	11.14	M0	1	Dead		1
TCGA-AC-A2FG-01A	TCGA-AC-A2FG-01A	11.36	MX	3	Alive	60.87	0
TCGA-LD-A66U-01A	TCGA-LD-A66U-01A	11.37	MX	3	Alive	21.22	0
TCGA-S3-AA12-01A	TCGA-S3-AA12-01A	11.37	MX	3	Alive	18.86	0
TCGA-LL-A440-01A	TCGA-LL-A440-01A	11.44	MX	3	Alive	24.93	0
TCGA-B6-A0IN-01A	TCGA-B6-A0IN-01A	11.45	MX	3	Dead	84.53	1
TCGA-GI-A2C9-01A	TCGA-GI-A2C9-01A	11.49	MX	3	Alive	109.79	0
TCGA-D8-A1JI-01A	TCGA-D8-A1JI-01A	11.53	MX	3	Alive	18.96	0
TCGA-5T-A9QA-01A	TCGA-5T-A9QA-01A	11.57	MX	3	Alive	9.95	0
TCGA-AC-A3YI-01A	TCGA-AC-A3YI-01A	11.58	MX	3	Alive	23.23	0
TCGA-A7-A13H-01A	TCGA-A7-A13H-01A	11.6	MX	3	Alive	29.53	0
TCGA-Z7-A8R5-01A	TCGA-Z7-A8R5-01A	11.6	MX	3	Alive	107.98	0
TCGA-LL-A7SZ-01A	TCGA-LL-A7SZ-01A	11.62	MX	3	Alive	19.51	0
TCGA-E9-A1R2-01A	TCGA-E9-A1R2-01A	11.72	MX	3	Alive	34.92	0
TCGA-LD-A7W5-01A	TCGA-LD-A7W5-01A		M0	1	Alive	7.1	0
TCGA-A7-A13E-01A	TCGA-A7-A13E-01A	11.73	MX	3	Dead	20.17	1
TCGA-OL-A6VQ-01A	TCGA-OL-A6VQ-01A	11.77	MX	3	Alive	19.71	0
TCGA-XX-A899-01A	TCGA-XX-A899-01A	11.85	MX	3	Alive	15.34	0
TCGA-OL-A5RX-01A	TCGA-OL-A5RX-01A	11.86	MX	3	Alive	28.84	0
TCGA-LL-A5YO-01A	TCGA-LL-A5YO-01A	11.89	MX	3	Alive	14.45	0
TCGA-E2-A1LL-01A	TCGA-E2-A1LL-01A	12.09	MX	3	Alive	43	0
TCGA-LL-A441-01A	TCGA-LL-A441-01A	12.1	MX	3	Alive	32.72	0
TCGA-AC-A3OD-01B	TCGA-AC-A3OD-01B	12.12	MX	3	Alive	14.82	0
TCGA-A8-A09C-01A	TCGA-A8-A09C-01A		MX	3	Alive	1.02	0
TCGA-E2-A9RU-01A	TCGA-E2-A9RU-01A	12.45	MX	3	Alive	17.67	0
TCGA-AC-A7VB-01A	TCGA-AC-A7VB-01A	12.47	MX	3	Alive	8.21	0
TCGA-OL-A5RY-01A	TCGA-OL-A5RY-01A	12.49	MX	3	Alive	24.7	0
TCGA-AC-A5EI-01A	TCGA-AC-A5EI-01A		MX	3	Alive	14.52	0
TCGA-AC-A2BM-01A	TCGA-AC-A2BM-01A	12.55	MX	3	Alive	99.28	0
TCGA-AC-A6NO-01A	TCGA-AC-A6NO-01A	12.65	MX	3	Alive	1.68	0
TCGA-AQ-A0Y5-01A	TCGA-AQ-A0Y5-01A	0	MX	3	Dead	5.65	1
TCGA-B6-A0IC-01A	TCGA-B6-A0IC-01A	9.394	MX	3	Dead	50.66	1
TCGA-B6-A0RM-01A	TCGA-B6-A0RM-01A	8.616	MX	3	Dead	77.96	1
TCGA-B6-A0WS-01A	TCGA-B6-A0WS-01A	11.35	MX	3	Dead	97.4	1
TCGA-BH-A1F6-01A	TCGA-BH-A1F6-01A	9.844	MX	3	Dead	97.4	1
TCGA-EW-A1IW-01A	TCGA-EW-A1IW-01A	12.78	MX	3	Alive	12.19	0
TCGA-OL-A66J-01A	TCGA-OL-A66J-01A	12.95	MX	3	Alive	65.57	0
TCGA-D8-A1Y1-01A	TCGA-D8-A1Y1-01A	10.18	MX	3	Dead	9.92	1
TCGA-WT-AB41-01A	TCGA-WT-AB41-01A	13.13	MX	3	Alive	52.92	0
TCGA-EW-A1IY-01A	TCGA-EW-A1IY-01A	13.26	MX	3	Alive	8.48	0
TCGA-D8-A1Y3-01A	TCGA-D8-A1Y3-01A	13.3	MX	3	Alive	14.13	0
TCGA-EW-A1PB-01A	TCGA-EW-A1PB-01A	13.39	MX	3	Alive	19.97	0
TCGA-AC-A3QQ-01B	TCGA-AC-A3QQ-01B	13.45	MX	3	Alive	24.11	0
TCGA-AC-A6IW-01A	TCGA-AC-A6IW-01A	13.54	MX	3	Alive	13.57	0
TCGA-OL-A5D6-01A	TCGA-OL-A5D6-01A	9.968	MX	3	Dead	36.27	1
TCGA-A7-A13G-01B	TCGA-A7-A13G-01B	13.95	MX	3	Alive	23.59	0
TCGA-OL-A66H-01A	TCGA-OL-A66H-01A	8.459	MX	3	Alive		0
TCGA-OL-A66K-01A	TCGA-OL-A66K-01A	8.387	MX	3	Dead	41.89	1
TCGA-OL-A5D7-01A	TCGA-OL-A5D7-01A	15.73	MX	3	Alive	58.48	0
TCGA-OL-A66I-01A	TCGA-OL-A66I-01A	15.97	MX	3	Alive	23.46	0
TCGA-BH-A0B2-01A	TCGA-BH-A0B2-01A	12.8
Total 1283; out of which
179 samples are
duplicated;
Out of this duplication
6 samples - triplicated
173 samples -duplicated
6 x 2 =12
173 x 1 = 173
Total 185
1283-185=1098 (TCGA)
Duplicates Removed
Xena Star Values
Cbioportal-rest

## Sheet: Meta-OS-04-12-19-Hi 25%
sample	sample	Star (fkpm+uq+1)	American Joint Committee on Cancer Metastasis Stage Code	M0=1; M1=2; MX=3	Patient's Vital Status	Overall Survival (Months)	Alive=0; Dead=1
TCGA-A8-A09T-01A	TCGA-A8-A09T-01A	0	MX	3	Alive	19.02	0
TCGA-AQ-A0Y5-01A	TCGA-AQ-A0Y5-01A	0	MX	3	Dead	5.65	1
TCGA-AQ-A1H2-01A	TCGA-AQ-A1H2-01A	6.191	MX	3	Alive	15.6	0
TCGA-D8-A1X5-01A	TCGA-D8-A1X5-01A	6.968	MX	3	Alive	18.56	0
TCGA-A8-A099-01A	TCGA-A8-A099-01A	7.331	MX	3	Alive	9.99	0
TCGA-A1-A0SN-01A	TCGA-A1-A0SN-01A	7.504	MX	3	Alive	39.29	0
TCGA-D8-A1X6-01A	TCGA-D8-A1X6-01A	7.814	MX	3	Alive	17.77	0
TCGA-A1-A0SQ-01A	TCGA-A1-A0SQ-01A	7.824	MX	3	Alive	18.2	0
TCGA-EW-A1OX-01A	TCGA-EW-A1OX-01A	7.955	MX	3	Alive	29.93	0
TCGA-AC-A3YJ-01A	TCGA-AC-A3YJ-01A	8.131	MX	3	Alive	24.77	0
TCGA-D8-A1JN-01A	TCGA-D8-A1JN-01A	8.202	MX	3	Alive	20.37	0
TCGA-AC-A8OR-01A	TCGA-AC-A8OR-01A	8.204	MX	3	Alive	1.31	0
TCGA-LL-A442-01A	TCGA-LL-A442-01A	8.236	MX	3	Alive	29.2	0
TCGA-OL-A66K-01A	TCGA-OL-A66K-01A	8.387	MX	3	Dead	41.89	1
TCGA-AQ-A04H-01B	TCGA-AQ-A04H-01B	8.39	MX	3	Alive	24.77	0
TCGA-D8-A1XJ-01A	TCGA-D8-A1XJ-01A	8.447	MX	3	Alive	21.81	0
TCGA-AC-A5EH-01A	TCGA-AC-A5EH-01A	8.452	MX	3	Alive	16.79	0
TCGA-B6-A0RM-01A	TCGA-B6-A0RM-01A	8.616	MX	3	Dead	77.96	1
TCGA-EW-A1OW-01A	TCGA-EW-A1OW-01A	8.621	MX	3	Alive	22.8	0
TCGA-LL-A6FP-01A	TCGA-LL-A6FP-01A	8.679	MX	3	Alive	22.24	0
TCGA-EW-A2FW-01A	TCGA-EW-A2FW-01A	8.719	MX	3	Alive	22.08	0
TCGA-EW-A1OY-01A	TCGA-EW-A1OY-01A	8.735	MX	3	Alive	29.83	0
TCGA-EW-A1PG-01A	TCGA-EW-A1PG-01A	8.836	MX	3	Alive	34.53	0
TCGA-D8-A1XZ-01A	TCGA-D8-A1XZ-01A	8.854	MX	3	Alive	15.31	0
TCGA-D8-A1X7-01A	TCGA-D8-A1X7-01A	8.879	MX	3	Alive	16.72	0
TCGA-D8-A1XY-01A	TCGA-D8-A1XY-01A	9.06	MX	3	Alive	16.52	0
TCGA-LQ-A4E4-01A	TCGA-LQ-A4E4-01A	9.089	MX	3	Alive	27.89	0
TCGA-BH-A0AZ-01A	TCGA-BH-A0AZ-01A	9.66	cM0 (i+)	1	Alive	63.04	0
TCGA-S3-AA14-01A	TCGA-S3-AA14-01A	10.45	cM0 (i+)	1	Alive	17.38	0
TCGA-S3-AA17-01A	TCGA-S3-AA17-01A	11.32	cM0 (i+)	1	Alive	13.93	0
TCGA-BH-A5IZ-01A	TCGA-BH-A5IZ-01A	11.72	cM0 (i+)	1	Alive	18.63	0
TCGA-BH-A18I-01A	TCGA-BH-A18I-01A	12.64	cM0 (i+)	1	Alive	35.91	0
TCGA-S3-AA15-01A	TCGA-S3-AA15-01A	13.32	cM0 (i+)	1	Alive	17.25	0
TCGA-GM-A5PX-01A	TCGA-GM-A5PX-01A	9.116	M0	1	Alive	18.1	0
TCGA-D8-A1X9-01A	TCGA-D8-A1X9-01A	9.119	M0	1	Alive	23.88	0
TCGA-AN-A0FL-01A	TCGA-AN-A0FL-01A	9.12	M0	1	Alive	7.59	0
TCGA-C8-A8HQ-01A	TCGA-C8-A8HQ-01A	9.122	M0	1	Alive	12.48	0
TCGA-A7-A0DA-01A	TCGA-A7-A0DA-01A	9.125	M0	1	Alive	35.64	0
TCGA-AR-A24Z-01A	TCGA-AR-A24Z-01A	9.141	M0	1	Alive	98.59	0
TCGA-D8-A1JG-01B	TCGA-D8-A1JG-01B	9.142	M0	1	Alive	52.96	0
TCGA-A2-A0CW-01A	TCGA-A2-A0CW-01A	9.143	M0	1	Alive	107.85	0
TCGA-AC-A23E-01A	TCGA-AC-A23E-01A	9.2	MX	3	Alive	22.93	0
TCGA-C8-A1HK-01A	TCGA-C8-A1HK-01A	9.159	M0	1	Alive	12.02	0
TCGA-A8-A06Q-01A	TCGA-A8-A06Q-01A	9.177	M0	1	Alive	1.02	0
TCGA-D8-A27F-01A	TCGA-D8-A27F-01A	9.184	M0	1	Alive	16.03	0
TCGA-BH-A0HN-01A	TCGA-BH-A0HN-01A	9.186	M0	1	Alive	16.95	0
TCGA-LL-A8F5-01A	TCGA-LL-A8F5-01A	9.23	MX	3	Alive	19.58	0
TCGA-C8-A27B-01A	TCGA-C8-A27B-01A	9.191	M0	1	Alive	14.42	0
TCGA-EW-A1P3-01A	TCGA-EW-A1P3-01A	9.239	MX	3	Alive	52.92	0
TCGA-AO-A12C-01A	TCGA-AO-A12C-01A	9.192	M0	1	Alive	77.92	0
TCGA-D8-A1JT-01A	TCGA-D8-A1JT-01A	9.215	M0	1	Alive	13.3	0
TCGA-AR-A0U2-01A	TCGA-AR-A0U2-01A	9.219	M0	1	Dead	83.8	1
TCGA-E2-A1B4-01A	TCGA-E2-A1B4-01A	9.229	M0	1	Dead	32.98	1
TCGA-E9-A248-01A	TCGA-E9-A248-01A	9.23	M0	1	Alive	1.94	0
TCGA-E9-A1N4-01A	TCGA-E9-A1N4-01A	9.234	M0	1	Alive	32.85	0
TCGA-C8-A26V-01A	TCGA-C8-A26V-01A	9.259	M0	1	Alive	20.24	0
TCGA-B6-A0WV-01A	TCGA-B6-A0WV-01A	9.271	M0	1	Dead	79.4	1
TCGA-A1-A0SH-01A	TCGA-A1-A0SH-01A	9.275	M0	1	Alive	47.21	0
TCGA-A2-A0YD-01A	TCGA-A2-A0YD-01A	9.279	M0	1	Alive	25.26	0
TCGA-PE-A5DE-01A	TCGA-PE-A5DE-01A	9.28	M0	1	Alive	86.89	0
TCGA-A2-A0EX-01A	TCGA-A2-A0EX-01A	9.285	M0	1	Alive	24.7	0
TCGA-B6-A1KI-01A	TCGA-B6-A1KI-01A	9.289	M0	1	Alive	73.46	0
TCGA-D8-A27T-01A	TCGA-D8-A27T-01A	9.295	M0	1	Alive	13.07	0
TCGA-AO-A03O-01A	TCGA-AO-A03O-01A	9.306	M0	1	Dead	81.57	1
TCGA-B6-A0IO-01A	TCGA-B6-A0IO-01A	9.307	M0	1	Alive	165.64	0
TCGA-A2-A25D-01A	TCGA-A2-A25D-01A	9.31	M0	1	Alive	18.13	0
TCGA-AC-A5XS-01A	TCGA-AC-A5XS-01A	9.336	MX	3	Alive	19.32	0
TCGA-C8-A12U-01A	TCGA-C8-A12U-01A	9.314	M0	1	Alive	12.65	0
TCGA-EW-A423-01A	TCGA-EW-A423-01A	9.341	MX	3	Alive	17.51	0
TCGA-AN-A0XS-01A	TCGA-AN-A0XS-01A	9.325	M0	1	Alive	0.33	0
TCGA-AO-A0JM-01A	TCGA-AO-A0JM-01A	9.329	M0	1	Alive	71.75	0
TCGA-BH-A0HY-01A	TCGA-BH-A0HY-01A	9.33	M0	1	Alive	50.76	0
TCGA-A8-A09N-01A	TCGA-A8-A09N-01A	9.334	M0	1	Alive	1.02	0
TCGA-E9-A244-01A	TCGA-E9-A244-01A	9.336	M0	1	Alive	0.69	0
TCGA-D8-A143-01A	TCGA-D8-A143-01A	9.338	M0	1	Alive	14.16	0
TCGA-C8-A26X-01A	TCGA-C8-A26X-01A	9.345	M0	1	Alive	12.35	0
TCGA-A8-A09Z-01A	TCGA-A8-A09Z-01A	9.348	M0	1	Alive	0	0
TCGA-D8-A1JF-01A	TCGA-D8-A1JF-01A	9.363	M0	1	Alive	12.02	0
TCGA-A8-A09D-01A	TCGA-A8-A09D-01A	9.365	M0	1	Alive	50	0
TCGA-D8-A142-01A	TCGA-D8-A142-01A	9.369	M0	1	Alive	13.96	0
TCGA-C8-A1HF-01A	TCGA-C8-A1HF-01A	9.372	M0	1	Alive	10.91	0
TCGA-A2-A3KD-01A	TCGA-A2-A3KD-01A	9.376	M0	1	Alive	39.62	0
TCGA-B6-A0IC-01A	TCGA-B6-A0IC-01A	9.394	MX	3	Dead	50.66	1
TCGA-D8-A13Z-01A	TCGA-D8-A13Z-01A	9.376	M0	1	Alive	20.86	0
TCGA-A8-A08C-01A	TCGA-A8-A08C-01A	9.377	M0	1	Alive	28.94	0
TCGA-AR-A0U0-01A	TCGA-AR-A0U0-01A	9.38	M0	1	Alive	65.31	0
TCGA-BH-A0DQ-01A	TCGA-BH-A0DQ-01A	9.384	M0	1	Alive	3.22	0
TCGA-AO-A12E-01A	TCGA-AO-A12E-01A	9.388	M0	1	Alive	70.37	0
TCGA-D8-A1J8-01A	TCGA-D8-A1J8-01A	9.388	M0	1	Alive	14.16	0
TCGA-AQ-A54O-01A	TCGA-AQ-A54O-01A	9.396	M0	1	Alive	32.88	0
TCGA-EW-A1PE-01A	TCGA-EW-A1PE-01A	9.402	M0	1	Alive	10.51	0
TCGA-AR-A250-01A	TCGA-AR-A250-01A	9.409	M0	1	Alive	88.93	0
TCGA-AR-A0U1-01A	TCGA-AR-A0U1-01A		M0	1	Alive	133.11	0
TCGA-E9-A1RI-01A	TCGA-E9-A1RI-01A	9.413	M0	1	Alive	47.6	0
TCGA-AC-A6IX-01A	TCGA-AC-A6IX-01A	9.433	MX	3	Alive	12.25	0
TCGA-BH-A0E1-01A	TCGA-BH-A0E1-01A	9.416	M0	1	Alive	15.67	0
TCGA-A8-A07E-01A	TCGA-A8-A07E-01A	9.458	MX	3	Alive	19.97	0
TCGA-AR-A24L-01A	TCGA-AR-A24L-01A	9.417	M0	1	Dead	94.15	1
TCGA-A2-A0CY-01A	TCGA-A2-A0CY-01A	9.423	M0	1	Alive	54.96	0
TCGA-E2-A573-01A	TCGA-E2-A573-01A	9.426	M0	1	Alive	34.89	0
TCGA-BH-A0C7-01B	TCGA-BH-A0C7-01B	9.43	M0	1	Alive	90.9	0
TCGA-LL-A6FQ-01A	TCGA-LL-A6FQ-01A	9.475	MX	3	Alive	2.63	0
TCGA-A7-A13D-01A	TCGA-A7-A13D-01A	9.432	M0	1	Alive	31.7	0
TCGA-A8-A08S-01A	TCGA-A8-A08S-01A	9.45	M0	1	Alive	32.98	0
TCGA-E9-A5UP-01A	TCGA-E9-A5UP-01A	9.465	M0	1	Alive	26.38	0
TCGA-A8-A094-01A	TCGA-A8-A094-01A	9.466	M0	1	Alive	0	0
TCGA-BH-A0HI-01A	TCGA-BH-A0HI-01A	9.467	M0	1	Alive	20.37	0
TCGA-WT-AB44-01A	TCGA-WT-AB44-01A	9.503	MX	3	Alive	29.01	0
TCGA-E9-A247-01A	TCGA-E9-A247-01A	9.473	M0	1	Alive	38.96	0
TCGA-AN-A049-01A	TCGA-AN-A049-01A	9.483	M0	1	Alive	0.62	0
TCGA-A2-A0CT-01A	TCGA-A2-A0CT-01A	9.49	M0	1	Alive	75.2	0
TCGA-PL-A8LZ-01A	TCGA-PL-A8LZ-01A	9.49	M0	1	Alive	9.92	0
TCGA-B6-A0X7-01A	TCGA-B6-A0X7-01A	9.518	MX	3	Dead	58.51	1
TCGA-D8-A27N-01A	TCGA-D8-A27N-01A	9.497	M0	1	Alive	17.05	0
TCGA-OL-A66N-01A	TCGA-OL-A66N-01A	9.523	MX	3	Alive	26.02	0
TCGA-AR-A24O-01A	TCGA-AR-A24O-01A	9.505	M0	1	Alive	118.5	0
TCGA-AN-A04D-01A	TCGA-AN-A04D-01A	9.507	M0	1	Alive	1.71	0
TCGA-AO-A0J2-01A	TCGA-AO-A0J2-01A	9.516	M0	1	Alive	32.75	0
TCGA-AO-A03V-01A	TCGA-AO-A03V-01A	9.517	M0	1	Alive	44.38	0
TCGA-D8-A27P-01A	TCGA-D8-A27P-01A	9.521	M0	1	Alive	1.61	0
TCGA-E2-A1IN-01A	TCGA-E2-A1IN-01A	9.527	M0	1	Alive	22.17	0
TCGA-A2-A0SU-01A	TCGA-A2-A0SU-01A	9.532	M0	1	Alive	54.6	0
TCGA-AO-A0JG-01A	TCGA-AO-A0JG-01A	9.533	M0	1	Alive	26.22	0
TCGA-A8-A06N-01A	TCGA-A8-A06N-01A	9.534	M0	1	Alive	0	0
TCGA-A8-A09G-01A	TCGA-A8-A09G-01A	9.547	M0	1	Alive	0	0
TCGA-A8-A07C-01A	TCGA-A8-A07C-01A	9.551	M0	1	Alive	33.97	0
TCGA-A7-A3RF-01A	TCGA-A7-A3RF-01A	9.555	M0	1	Alive	13.4	0
TCGA-BH-A0AV-01A	TCGA-BH-A0AV-01A	9.556	M0	1	Alive	59.79	0
TCGA-AN-A0AM-01A	TCGA-AN-A0AM-01A	9.557	M0	1	Alive	0.16	0
TCGA-D8-A3Z5-01A	TCGA-D8-A3Z5-01A	9.56	M0	1	Alive	33.34	0
TCGA-E2-A1IL-01A	TCGA-E2-A1IL-01A	9.564	M0	1	Alive	3.88	0
TCGA-BH-A1EN-01A	TCGA-BH-A1EN-01A	9.571	M0	1	Dead	69.88	1
TCGA-BH-A0H9-01A	TCGA-BH-A0H9-01A	9.577	M0	1	Alive	40.97	0
TCGA-A8-A06U-01A	TCGA-A8-A06U-01A	9.584	M0	1	Dead	29.01	1
TCGA-A2-A0YT-01A	TCGA-A2-A0YT-01A	9.585	M0	1	Dead	23.75	1
TCGA-AC-A5XU-01A	TCGA-AC-A5XU-01A	9.597	MX	3	Alive	14.95	0
TCGA-LL-A50Y-01A	TCGA-LL-A50Y-01A	9.6	MX	3	Alive	25.03	0
TCGA-E2-A1B0-01A	TCGA-E2-A1B0-01A	9.591	M0	1	Alive	53.58	0
TCGA-GM-A2DK-01A	TCGA-GM-A2DK-01A	9.592	M0	1	Alive	86.89	0
TCGA-GM-A2DM-01A	TCGA-GM-A2DM-01A	9.593	M0	1	Alive	105.98	0
TCGA-A7-A3IY-01A	TCGA-A7-A3IY-01A	9.594	M0	1	Alive	11.33	0
TCGA-AC-A3HN-01A	TCGA-AC-A3HN-01A	9.614	MX	3	Alive	16.29	0
TCGA-AO-A0JA-01A	TCGA-AO-A0JA-01A	9.596	M0	1	Alive	21.52	0
TCGA-D8-A1JP-01A	TCGA-D8-A1JP-01A	9.604	M0	1	Alive	20.99	0
TCGA-A7-A4SB-01A	TCGA-A7-A4SB-01A	9.606	M0	1	Alive	13.73	0
TCGA-D8-A1XS-01A	TCGA-D8-A1XS-01A	9.606	M0	1	Alive	16.29	0
TCGA-LL-A740-01A	TCGA-LL-A740-01A	9.638	MX	3	Alive	14.49	0
TCGA-AO-A1KR-01A	TCGA-AO-A1KR-01A	9.611	M0	1	Alive	82.56	0
TCGA-E9-A22B-01A	TCGA-E9-A22B-01A	9.628	M0	1	Alive	38.34	0
TCGA-AN-A0AL-01A	TCGA-AN-A0AL-01A	9.633	M0	1	Alive	7.46	0
TCGA-AN-A0FD-01A	TCGA-AN-A0FD-01A	9.636	M0	1	Alive	6.44	0
TCGA-AN-A0FF-01A	TCGA-AN-A0FF-01A	9.636	M0	1	Alive	5.65	0
TCGA-D8-A73W-01A	TCGA-D8-A73W-01A	9.675	MX	3	Dead	12.65	1
TCGA-A2-A0EM-01A	TCGA-A2-A0EM-01A	9.645	M0	1	Alive	101.64	0
TCGA-BH-A0AW-01A	TCGA-BH-A0AW-01A	9.645	M0	1	Alive	20.43	0
TCGA-BH-A1FL-01A	TCGA-BH-A1FL-01A	9.65	M0	1	Dead	54.96	1
TCGA-C8-A275-01A	TCGA-C8-A275-01A	9.668	M0	1	Alive	0.03	0
TCGA-C8-A12Q-01A	TCGA-C8-A12Q-01A	9.683	M0	1	Dead	12.65	1
TCGA-E9-A1ND-01A	TCGA-E9-A1ND-01A	9.685	M0	1	Alive	41.59	0
TCGA-PE-A5DD-01A	TCGA-PE-A5DD-01A	9.685	M0	1	Alive	64.16	0
TCGA-D8-A27H-01A	TCGA-D8-A27H-01A	9.689	M0	1	Alive	13.04	0
TCGA-EW-A1PD-01A	TCGA-EW-A1PD-01A	9.692	M0	1	Alive	13.93	0
TCGA-BH-A1FM-01A	TCGA-BH-A1FM-01A	9.698	M0	1	Dead	45.6	1
TCGA-C8-A130-01A	TCGA-C8-A130-01A	9.7	M0	1	Alive	12.16	0
TCGA-AN-A0FV-01A	TCGA-AN-A0FV-01A	9.707	M0	1	Alive	0.33	0
TCGA-BH-A0BA-01A	TCGA-BH-A0BA-01A	9.71	M0	1	Alive	37.19	0
TCGA-AC-A6IV-01A	TCGA-AC-A6IV-01A	9.716	MX	3	Alive	18.66	0
TCGA-AC-A3TN-01A	TCGA-AC-A3TN-01A	9.719	MX	3	Alive	14.98	0
TCGA-AC-A62X-01A	TCGA-AC-A62X-01A	9.725	MX	3	Alive	13.7	0
TCGA-BH-A0BR-01A	TCGA-BH-A0BR-01A	9.711	M0	1	Alive	76.54	0
TCGA-A8-A0A1-01A	TCGA-A8-A0A1-01A	9.713	M0	1	Alive	11.99	0
TCGA-AN-A0FT-01A	TCGA-AN-A0FT-01A	9.716	M0	1	Alive	7.03	0
TCGA-E2-A109-01A	TCGA-E2-A109-01A	9.716	M0	1	Alive	46.55	0
TCGA-EW-A1J2-01A	TCGA-EW-A1J2-01A	9.733	MX	3	Alive	13.24	0
TCGA-A8-A090-01A	TCGA-A8-A090-01A	9.727	M0	1	Alive	0	0
TCGA-BH-A208-01A	TCGA-BH-A208-01A	9.729	M0	1	Dead	57.79	1
TCGA-A7-A2KD-01A	TCGA-A7-A2KD-01A	9.749	MX	3	Alive	22.31	0
TCGA-D8-A27V-01A	TCGA-D8-A27V-01A	9.73	M0	1	Alive	12.52	0
TCGA-E9-A1NH-01A	TCGA-E9-A1NH-01A	9.731	M0	1	Alive	18.92	0
TCGA-E2-A15M-01A	TCGA-E2-A15M-01A	9.736	M0	1	Dead	11.04	1
TCGA-A2-A25E-01A	TCGA-A2-A25E-01A	9.738	M0	1	Alive	105.26	0
TCGA-E9-A1NA-01A	TCGA-E9-A1NA-01A	9.76	M0	1	Alive	36.53	0
TCGA-A8-A07Z-01A	TCGA-A8-A07Z-01A	9.763	M0	1	Alive	45.04	0
TCGA-D8-A1XL-01A	TCGA-D8-A1XL-01A	9.782	MX	3	Alive	19.91	0
TCGA-E2-A1BC-01A	TCGA-E2-A1BC-01A	9.771	M0	1	Alive	16.46	0
TCGA-D8-A147-01A	TCGA-D8-A147-01A	9.773	M0	1	Alive	19.19	0
TCGA-LL-A5YP-01A	TCGA-LL-A5YP-01A	9.779	M0	1	Alive	14.78	0
TCGA-E2-A10F-01A	TCGA-E2-A10F-01A	9.782	M0	1	Alive	28.84	0
TCGA-EW-A1OZ-01A	TCGA-EW-A1OZ-01A	9.784	M0	1	Alive	40.37	0
TCGA-A8-A09A-01A	TCGA-A8-A09A-01A	9.785	M0	1	Alive	9.99	0
TCGA-A7-A26H-01A	TCGA-A7-A26H-01A	9.796	M0	1	Alive	23.78	0
TCGA-AR-A24W-01A	TCGA-AR-A24W-01A	9.796	M0	1	Alive	50.92	0
TCGA-A2-A0YI-01A	TCGA-A2-A0YI-01A	9.797	M0	1	Alive	49.44	0
TCGA-B6-A0X5-01A	TCGA-B6-A0X5-01A	9.797	M0	1	Dead	68.89	1
TCGA-A1-A0SI-01A	TCGA-A1-A0SI-01A	9.799	M0	1	Alive	20.86	0
TCGA-AR-A0TY-01A	TCGA-AR-A0TY-01A	9.806	M0	1	Dead	55.81	1
TCGA-E2-A15H-01A	TCGA-E2-A15H-01A	9.806	M0	1	Alive	12.91	0
TCGA-A2-A0EO-01A	TCGA-A2-A0EO-01A	9.808	M0	1	Alive	80.22	0
TCGA-AC-A3W6-01A	TCGA-AC-A3W6-01A	9.836	MX	3	Alive	19.78	0
TCGA-A2-A1G6-01A	TCGA-A2-A1G6-01A	9.81	M0	1	Alive	16.46	0
TCGA-BH-A1F6-01A	TCGA-BH-A1F6-01A	9.844	MX	3	Dead	97.4	1
TCGA-V7-A7HQ-01A	TCGA-V7-A7HQ-01A	9.822	M0	1	Alive	66.79	0
TCGA-D8-A1XU-01A	TCGA-D8-A1XU-01A	9.832	M0	1	Alive	12.98	0
TCGA-AC-A2BK-01A	TCGA-AC-A2BK-01A	9.858	MX	3	Alive	73	0
TCGA-AN-A0FN-01A	TCGA-AN-A0FN-01A	9.84	M0	1	Alive	7.16	0
TCGA-EW-A2FV-01A	TCGA-EW-A2FV-01A	9.863	MX	3	Alive	25.89	0
TCGA-A2-A0YG-01A	TCGA-A2-A0YG-01A	9.851	M0	1	Alive	21.88	0
TCGA-AC-A23C-01A	TCGA-AC-A23C-01A	9.878	MX	3	Alive	19.22	0
TCGA-AO-A12D-01A	TCGA-AO-A12D-01A	9.851	M0	1	Alive	82.62	0
TCGA-AC-A4ZE-01A	TCGA-AC-A4ZE-01A	9.859	M0	1	Alive	29.24	0
TCGA-BH-A202-01A	TCGA-BH-A202-01A	9.864	M0	1	Alive	26.12	0
TCGA-LL-A6FR-01A	TCGA-LL-A6FR-01A	9.888	MX	3	Alive	16.06	0
TCGA-AR-A24H-01A	TCGA-AR-A24H-01A	9.88	M0	1	Alive	160.78	0
TCGA-C8-A8HR-01A	TCGA-C8-A8HR-01A	9.882	M0	1	Alive	13.4	0
TCGA-EW-A1J1-01A	TCGA-EW-A1J1-01A	9.887	M0	1	Alive	18.89	0
TCGA-BH-A8FY-01A	TCGA-BH-A8FY-01A	9.895	M0	1	Dead	9.69	1
TCGA-D8-A4Z1-01A	TCGA-D8-A4Z1-01A	9.912	M0	1	Alive	21.65	0
TCGA-HN-A2OB-01A	TCGA-HN-A2OB-01A	9.918	M0	1	Dead	62.42	1
TCGA-GI-A2C8-01A	TCGA-GI-A2C8-01A	9.938	MX	3	Alive	7.39	0
TCGA-E2-A15T-01A	TCGA-E2-A15T-01A	9.922	M0	1	Alive	51.35	0
TCGA-AC-A3W5-01A	TCGA-AC-A3W5-01A	9.942	MX	3	Alive	16.56	0
TCGA-A8-A08X-01A	TCGA-A8-A08X-01A	9.924	M0	1	Alive	42.97	0
TCGA-D8-A1XM-01A	TCGA-D8-A1XM-01A	9.928	M0	1	Alive	17.67	0
TCGA-BH-A0DO-01B	TCGA-BH-A0DO-01B	9.941	M0	1	Alive	54.01	0
TCGA-AN-A0XL-01A	TCGA-AN-A0XL-01A	9.948	M0	1	Alive	5.35	0
TCGA-OL-A5D6-01A	TCGA-OL-A5D6-01A	9.968	MX	3	Dead	36.27	1
TCGA-E2-A14Z-01A	TCGA-E2-A14Z-01A	9.948	M0	1	Dead	18.5	1
TCGA-E2-A14Q-01A	TCGA-E2-A14Q-01A	9.953	M0	1	Alive	38.21	0
TCGA-A8-A09V-01A	TCGA-A8-A09V-01A	9.967	M0	1	Alive	15.01	0
TCGA-BH-A0DV-01A	TCGA-BH-A0DV-01A	9.971	M0	1	Alive	67.81	0
TCGA-B6-A409-01A	TCGA-B6-A409-01A	9.976	M0	1	Dead	18.82	1
TCGA-UL-AAZ6-01A	TCGA-UL-AAZ6-01A	9.983	MX	3	Alive	17.02	0
TCGA-D8-A146-01A	TCGA-D8-A146-01A	9.984	MX	3	Alive	21.12	0
TCGA-AN-A0AK-01A	TCGA-AN-A0AK-01A	9.977	M0	1	Alive	7.36	0
TCGA-XX-A89A-01A	TCGA-XX-A89A-01A	9.987	MX	3	Alive	16.03	0
TCGA-A8-A09M-01A	TCGA-A8-A09M-01A	9.981	M0	1	Alive	33.05	0
TCGA-W8-A86G-01A	TCGA-W8-A86G-01A	9.99	MX	3	Alive	11.4	0
TCGA-BH-A18H-01A	TCGA-BH-A18H-01A	9.982	M0	1	Alive	21.42	0
TCGA-B6-A2IU-01A	TCGA-B6-A2IU-01A	9.985	M0	1	Alive	170.04	0
TCGA-A8-A06P-01A	TCGA-A8-A06P-01A	9.99	M0	1	Alive	13.01	0
TCGA-E9-A229-01A	TCGA-E9-A229-01A	9.995	M0	1	Alive	37.71	0
TCGA-E2-A1IJ-01A	TCGA-E2-A1IJ-01A	9.998	M0	1	Alive	28.42	0
TCGA-AO-A0JE-01A	TCGA-AO-A0JE-01A	10	M0	1	Alive	76.71	0
TCGA-AC-A3W7-01A	TCGA-AC-A3W7-01A	10.01	MX	3	Alive	15.47	0
TCGA-A8-A09X-01A	TCGA-A8-A09X-01A	10.01	M0	1	Dead	13.99	1
TCGA-BH-A18P-01A	TCGA-BH-A18P-01A	10.01	M0	1	Dead	30.26	1
TCGA-E9-A3X8-01A	TCGA-E9-A3X8-01A	10.01	M0	1	Alive	30.42	0
TCGA-A7-A6VV-01A	TCGA-A7-A6VV-01A	10.02	M0	1	Alive	10.28	0
TCGA-AN-A0AT-01A	TCGA-AN-A0AT-01A	10.02	M0	1	Alive	0.33	0
TCGA-AN-A0FZ-01A	TCGA-AN-A0FZ-01A	10.02	M0	1	Alive	0.33	0
TCGA-D8-A27M-01A	TCGA-D8-A27M-01A	10.02	M0	1	Alive	13.47	0
TCGA-E2-A10A-01A	TCGA-E2-A10A-01A	10.02	M0	1	Alive	40.37	0
TCGA-A2-A4S3-01A	TCGA-A2-A4S3-01A	10.03	M0	1	Alive	21.88	0
TCGA-B6-A0WZ-01A	TCGA-B6-A0WZ-01A	10.03	M0	1	Alive	206.7	0
TCGA-E2-A14R-01A	TCGA-E2-A14R-01A	10.03	M0	1	Alive	38.57	0
TCGA-B6-A0RN-01A	TCGA-B6-A0RN-01A	10.04	M0	1	Alive	263.07	0
TCGA-D8-A73X-01A	TCGA-D8-A73X-01A	10.04	M0	1	Alive	25.2	0
TCGA-E9-A1NE-01A	TCGA-E9-A1NE-01A	10.04	M0	1	Alive	35.74	0
TCGA-C8-A26Z-01A	TCGA-C8-A26Z-01A	10.05	M0	1	Alive	15.44	0
TCGA-BH-A0BT-01A	TCGA-BH-A0BT-01A	10.06	M0	1	Alive	77.69	0
TCGA-E2-A10B-01A	TCGA-E2-A10B-01A	10.06	M0	1	Alive	37.48	0
TCGA-E9-A1R7-01A	TCGA-E9-A1R7-01A	10.06	M0	1	Alive	48.19	0
TCGA-A2-A3XS-01A	TCGA-A2-A3XS-01A	10.07	M0	1	Dead	33.9	1
TCGA-BH-A0AU-01A	TCGA-BH-A0AU-01A	10.07	M0	1	Alive	62.88	0
TCGA-E2-A1IO-01A	TCGA-E2-A1IO-01A	10.07	M0	1	Alive	60.94	0
TCGA-BH-A1FR-01A	TCGA-BH-A1FR-01A	10.09	M0	1	Dead	53.94	1
TCGA-AC-A2FF-01A	TCGA-AC-A2FF-01A	10.11	MX	3	Alive	90.64	0
TCGA-OL-A66L-01A	TCGA-OL-A66L-01A	10.11	MX	3	Alive	42.74	0
TCGA-JL-A3YW-01A	TCGA-JL-A3YW-01A	10.09	M0	1	Alive	11.83	0
TCGA-E2-A14Y-01A	TCGA-E2-A14Y-01A	10.1	M0	1	Alive	69.28	0
TCGA-E9-A22H-01A	TCGA-E9-A22H-01A	10.1	M0	1	Alive	40.47	0
TCGA-A2-A0CP-01A	TCGA-A2-A0CP-01A	10.12	M0	1	Alive	92.41	0
TCGA-OL-A6VO-01A	TCGA-OL-A6VO-01A	10.12	MX	3	Alive	28.19	0
TCGA-AN-A0FW-01A	TCGA-AN-A0FW-01A	10.12	M0	1	Alive	0.36	0
TCGA-AR-A5QM-01A	TCGA-AR-A5QM-01A	10.12	M0	1	Alive	73.29	0
TCGA-EW-A6SD-01A	TCGA-EW-A6SD-01A	10.12	M0	1	Alive	33.18	0
TCGA-AO-A1KS-01A	TCGA-AO-A1KS-01A	10.13	M0	1	Alive	11.5	0
TCGA-A2-A0CX-01A	TCGA-A2-A0CX-01A	10.14	M0	1	Alive	56.77	0
TCGA-AC-A62Y-01A	TCGA-AC-A62Y-01A	10.14	MX	3	Alive	17.41	0
TCGA-LL-A5YL-01A	TCGA-LL-A5YL-01A	10.14	MX	3	Alive	17.05	0
TCGA-AR-A0TQ-01A	TCGA-AR-A0TQ-01A	10.14	M0	1	Alive	98.26	0
TCGA-E2-A572-01A	TCGA-E2-A572-01A	10.14	M0	1	Alive	39.68	0
TCGA-EW-A6S9-01A	TCGA-EW-A6S9-01A	10.14	M0	1	Alive	15.21	0
TCGA-EW-A1P0-01A	TCGA-EW-A1P0-01A	10.15	MX	3	Alive	41.1	0
TCGA-EW-A2FR-01A	TCGA-EW-A2FR-01A	10.15	MX	3	Alive	54.96	0
TCGA-EW-A424-01A	TCGA-EW-A424-01A	10.15	MX	3	Alive	23.49	0
TCGA-BH-A0EE-01A	TCGA-BH-A0EE-01A	10.15	M0	1	Alive	30.98	0
TCGA-E2-A1LS-01A	TCGA-E2-A1LS-01A	10.15	M0	1	Alive	52.69	0
TCGA-AN-A046-01A	TCGA-AN-A046-01A	10.16	M0	1	Alive	0.33	0
TCGA-BH-A0B4-01A	TCGA-BH-A0B4-01A	10.16	M0	1	Alive	39.13	0
TCGA-EW-A3U0-01A	TCGA-EW-A3U0-01A	10.16	M0	1	Alive	17.48	0
TCGA-5L-AAT0-01A	TCGA-5L-AAT0-01A	10.17	M0	1	Alive	48.52	0
TCGA-A8-A09I-01A	TCGA-A8-A09I-01A	10.17	M0	1	Alive	45.04	0
TCGA-BH-A0HX-01A	TCGA-BH-A0HX-01A	10.17	M0	1	Alive	27.23	0
TCGA-A2-A04X-01A	TCGA-A2-A04X-01A	10.18	M0	1	Alive	55.39	0
TCGA-A8-A08R-01A	TCGA-A8-A08R-01A	10.18	M0	1	Alive	0.99	0
TCGA-D8-A1Y1-01A	TCGA-D8-A1Y1-01A	10.18	MX	3	Dead	9.92	1
TCGA-AR-A1AK-01A	TCGA-AR-A1AK-01A	10.18	M0	1	Alive	103.78	0
TCGA-PE-A5DC-01A	TCGA-PE-A5DC-01A	10.18	M0	1	Dead	46.98	1
TCGA-B6-A0RG-01A	TCGA-B6-A0RG-01A	10.19	M0	1	Alive	68.4	0
TCGA-BH-A1F5-01A	TCGA-BH-A1F5-01A	10.19	M0	1	Dead	89.09	1
TCGA-EW-A2FS-01A	TCGA-EW-A2FS-01A	10.2	MX	3	Alive	52.69	0
TCGA-D8-A1XG-01A	TCGA-D8-A1XG-01A	10.19	M0	1	Alive	14.72	0
TCGA-A8-A093-01A	TCGA-A8-A093-01A	10.2	M0	1	Alive	17.94	0
TCGA-E2-A14O-01A	TCGA-E2-A14O-01A	10.21	M0	1	Alive	44.65	0
TCGA-E2-A576-01A	TCGA-E2-A576-01A	10.22	MX	3	Alive	34.26	0
TCGA-A2-A0SX-01A	TCGA-A2-A0SX-01A	10.22	M0	1	Alive	50.39	0
TCGA-BH-A0B3-01A	TCGA-BH-A0B3-01A	10.22	M0	1	Alive	39.52	0
TCGA-E9-A1RE-01A	TCGA-E9-A1RE-01A	10.25	M0	1	Alive	46.62	0
TCGA-BH-A0B1-01A	TCGA-BH-A0B1-01A	10.26	M0	1	Alive	37.71	0
TCGA-BH-AB28-01A	TCGA-BH-AB28-01A	10.26	M0	1	Alive	9.43	0
TCGA-A7-A26J-01A	TCGA-A7-A26J-01A	10.27	M0	1	Alive	20.6	0
TCGA-A8-A06T-01A	TCGA-A8-A06T-01A	10.27	M0	1	Alive	53.02	0
TCGA-A8-A0A2-01A	TCGA-A8-A0A2-01A	10.27	M0	1	Alive	19.02	0
TCGA-B6-A0IH-01A	TCGA-B6-A0IH-01A	10.27	M0	1	Dead	112.29	1
TCGA-C8-A3M7-01A	TCGA-C8-A3M7-01A	10.27	M0	1	Dead	33.97	1
TCGA-D8-A1XA-01A	TCGA-D8-A1XA-01A	10.27	M0	1	Alive	27.56	0
TCGA-EW-A1J3-01A	TCGA-EW-A1J3-01A	10.27	M0	1	Alive	16.56	0
TCGA-A7-A13F-01A	TCGA-A7-A13F-01A	10.28	M0	1	Alive	25.13	0
TCGA-AQ-A7U7-01A	TCGA-AQ-A7U7-01A	10.28	M0	1	Dead	19.19	1
TCGA-AR-A0TT-01A	TCGA-AR-A0TT-01A	10.28	M0	1	Alive	108.94	0
TCGA-BH-A0BD-01A	TCGA-BH-A0BD-01A	10.28	M0	1	Alive	18.2	0
TCGA-E9-A1R6-01A	TCGA-E9-A1R6-01A	10.29	M0	1	Alive	11.14	0
TCGA-AC-A7VC-01A	TCGA-AC-A7VC-01A	10.31	MX	3	Alive	0.03	0
TCGA-EW-A1OV-01A	TCGA-EW-A1OV-01A	10.31	MX	3	Alive	25.92	0
TCGA-BH-A0BP-01A	TCGA-BH-A0BP-01A	10.3	M0	1	Dead	75.43	1
TCGA-A8-A091-01A	TCGA-A8-A091-01A	10.31	M0	1	Alive	32.98	0
TCGA-A7-A0CG-01A	TCGA-A7-A0CG-01A	10.32	M0	1	Alive	34.26	0
TCGA-A8-A097-01A	TCGA-A8-A097-01A	10.32	M0	1	Alive	11.99	0
TCGA-AR-A24U-01A	TCGA-AR-A24U-01A	10.32	M0	1	Alive	102.76	0
TCGA-E2-A108-01A	TCGA-E2-A108-01A	10.32	M0	1	Alive	27.5	0
TCGA-AN-A0XO-01A	TCGA-AN-A0XO-01A	10.33	M0	1	Alive	12.32	0
TCGA-D8-A1JH-01A	TCGA-D8-A1JH-01A	10.33	M0	1	Alive	13.99	0
TCGA-AR-A2LR-01A	TCGA-AR-A2LR-01A	10.34	M0	1	Alive	57.23	0
TCGA-AC-A3QP-01A	TCGA-AC-A3QP-01A	10.34	MX	3	Alive	22.17	0
TCGA-OL-A5RW-01A	TCGA-OL-A5RW-01A	10.34	MX	3	Alive	36.33	0
TCGA-OL-A66O-01A	TCGA-OL-A66O-01A	10.34	MX	3	Alive	17.35	0
TCGA-B6-A0IQ-01A	TCGA-B6-A0IQ-01A	10.34	M0	1	Alive	140.77	0
TCGA-BH-A1EW-01A	TCGA-BH-A1EW-01A	10.34	M0	1	Dead	55.65	1
TCGA-AR-A2LK-01A	TCGA-AR-A2LK-01A	10.35	M0	1	Dead	54.17	1
TCGA-OL-A5RV-01A	TCGA-OL-A5RV-01A	10.36	MX	3	Alive	34.89	0
TCGA-3C-AAAU-01A	TCGA-3C-AAAU-01A	10.37	MX	3	Alive	132.95	0
TCGA-E2-A14N-01A	TCGA-E2-A14N-01A	10.35	M0	1	Alive	47.11	0
TCGA-BH-A1FU-01A	TCGA-BH-A1FU-01A	10.36	M0	1	Dead	55.45	1
TCGA-B6-A0IM-01A	TCGA-B6-A0IM-01A	10.38	M0	1	Dead	127.23	1
TCGA-BH-A18F-01A	TCGA-BH-A18F-01A	10.38	M0	1	Alive	32.88	0
TCGA-AR-A252-01A	TCGA-AR-A252-01A	10.39	M0	1	Alive	93.23	0
TCGA-BH-A0H6-01A	TCGA-BH-A0H6-01A	10.39	M0	1	Alive	24.54	0
TCGA-D8-A1J9-01A	TCGA-D8-A1J9-01A	10.39	M0	1	Alive	17.48	0
TCGA-E2-A1IU-01A	TCGA-E2-A1IU-01A	10.39	M0	1	Alive	11.07	0
TCGA-BH-A0BC-01A	TCGA-BH-A0BC-01A	10.4	M0	1	Alive	32	0
TCGA-C8-A8HP-01A	TCGA-C8-A8HP-01A	10.4	M0	1	Alive	13.01	0
TCGA-EW-A1PF-01A	TCGA-EW-A1PF-01A	10.4	M0	1	Alive	14.42	0
TCGA-A2-A0SY-01A	TCGA-A2-A0SY-01A	10.41	M0	1	Alive	44.25	0
TCGA-AQ-A1H3-01A	TCGA-AQ-A1H3-01A	10.41	MX	3	Alive	32.49	0
TCGA-OL-A5DA-01A	TCGA-OL-A5DA-01A	10.41	MX	3	Alive	58.57	0
TCGA-AN-A0FX-01A	TCGA-AN-A0FX-01A	10.41	M0	1	Alive	0.33	0
TCGA-EW-A3E8-01B	TCGA-EW-A3E8-01B	10.42	MX	3	Alive	34	0
TCGA-AO-A0JD-01A	TCGA-AO-A0JD-01A	10.41	M0	1	Alive	71.94	0
TCGA-A8-A0A4-01A	TCGA-A8-A0A4-01A	10.42	M0	1	Alive	13.01	0
TCGA-3C-AALK-01A	TCGA-3C-AALK-01A	10.43	M0	1	Alive	47.57	0
TCGA-A8-A07G-01A	TCGA-A8-A07G-01A	10.43	M0	1	Alive	18.96	0
TCGA-BH-A0C3-01A	TCGA-BH-A0C3-01A	10.43	M0	1	Alive	88.99	0
TCGA-EW-A1P1-01A	TCGA-EW-A1P1-01A	10.43	MX	3	Alive	39.75	0
TCGA-E2-A1IF-01A	TCGA-E2-A1IF-01A	10.43	M0	1	Alive	37.39	0
TCGA-E2-A1LI-01A	TCGA-E2-A1LI-01A	10.43	M0	1	Alive	102.53	0
TCGA-AR-A2LQ-01A	TCGA-AR-A2LQ-01A	10.44	M0	1	Alive	40.51	0
TCGA-BH-A0E9-01B	TCGA-BH-A0E9-01B	10.44	M0	1	Alive	81.77	0
TCGA-E2-A2P5-01A	TCGA-E2-A2P5-01A	10.44	M0	1	Dead	26.97	1
TCGA-A2-A1G0-01A	TCGA-A2-A1G0-01A	10.46	M0	1	Alive	20.24	0
TCGA-D8-A27I-01A	TCGA-D8-A27I-01A	10.46	M0	1	Alive	14.42	0
TCGA-E2-A153-01A	TCGA-E2-A153-01A	10.46	M0	1	Alive	23.23	0
TCGA-GM-A2D9-01A	TCGA-GM-A2D9-01A	10.46	M0	1	Dead	59.53	1
TCGA-AC-A2QI-01A	TCGA-AC-A2QI-01A	10.47	MX	3	Alive	19.32	0
TCGA-E2-A1IK-01A	TCGA-E2-A1IK-01A	10.47	M0	1	Alive	59.13	0
TCGA-AR-A24R-01A	TCGA-AR-A24R-01A	10.48	M0	1	Alive	112.68	0
TCGA-C8-A12O-01A	TCGA-C8-A12O-01A	10.48	M0	1	Alive	12.65	0
TCGA-A7-A26E-01A	TCGA-A7-A26E-01A	10.48	MX	3	Alive	31.34	0
TCGA-E2-A1IG-01A	TCGA-E2-A1IG-01A	10.48	M0	1	Alive	70.3	0
TCGA-AC-A3TM-01A	TCGA-AC-A3TM-01A	10.49	M0	1	Alive	25.03	0
TCGA-AO-A124-01A	TCGA-AO-A124-01A	10.49	M0	1	Alive	115.18	0
TCGA-A8-A0A6-01A	TCGA-A8-A0A6-01A	10.5	M0	1	Alive	21.02	0
TCGA-B6-A0RQ-01A	TCGA-B6-A0RQ-01A	10.5	M0	1	Dead	140.18	1
TCGA-BH-A1FG-01A	TCGA-BH-A1FG-01A	10.5	M0	1	Dead	122.73	1
TCGA-C8-A1HN-01A	TCGA-C8-A1HN-01A	10.5	M0	1	Alive	12.94	0
TCGA-GM-A3XG-01A	TCGA-GM-A3XG-01A	10.5	M0	1	Alive	43.69	0
TCGA-A2-A04V-01A	TCGA-A2-A04V-01A	10.52	M0	1	Dead	63.07	1
TCGA-E2-A15S-01A	TCGA-E2-A15S-01A	10.52	M0	1	Alive	14.06	0
TCGA-E9-A1NC-01A	TCGA-E9-A1NC-01A	10.52	M0	1	Alive	39.52	0
TCGA-C8-A9FZ-01A	TCGA-C8-A9FZ-01A		M0	1	Alive	19.45	0
TCGA-EW-A1J6-01A	TCGA-EW-A1J6-01A	10.52	M0	1	Alive	28.75	0
TCGA-BH-A1EO-01A	TCGA-BH-A1EO-01A	10.53	M0	1	Dead	91.92	1
TCGA-C8-A12W-01A	TCGA-C8-A12W-01A	10.53	M0	1	Alive	12.65	0
TCGA-E9-A1R0-01A	TCGA-E9-A1R0-01A	10.53	M0	1	Alive	28.25	0
TCGA-AR-A256-01A	TCGA-AR-A256-01A	10.54	M0	1	Dead	93.76	1
TCGA-OL-A66P-01A	TCGA-OL-A66P-01A	10.54	MX	3	Alive	14.06	0
TCGA-S3-AA11-01A	TCGA-S3-AA11-01A	10.54	M0	1	Alive	13.83	0
TCGA-A8-A0A7-01A	TCGA-A8-A0A7-01A	10.55	M0	1	Alive	0.99	0
TCGA-BH-A201-01A	TCGA-BH-A201-01A	10.55	M0	1	Alive	28.12	0
TCGA-A8-A084-01A	TCGA-A8-A084-01A	10.56	M0	1	Alive	15.05	0
TCGA-AR-A0TU-01A	TCGA-AR-A0TU-01A	10.56	M0	1	Alive	23.29	0
TCGA-C8-A12N-01A	TCGA-C8-A12N-01A	10.56	M0	1	Alive	11.76	0
TCGA-E2-A107-01A	TCGA-E2-A107-01A	10.57	M0	1	Alive	34.4	0
TCGA-A7-A3J1-01A	TCGA-A7-A3J1-01A	10.58	MX	3	Alive	11.27	0
TCGA-AR-A255-01A	TCGA-AR-A255-01A	10.58	M0	1	Alive	70.99	0
TCGA-BH-A0EA-01A	TCGA-BH-A0EA-01A	10.59	M0	1	Dead	32.56	1
TCGA-BH-A1EU-01A	TCGA-BH-A1EU-01A	10.6	M0	1	Dead	42.25	1
TCGA-A7-A4SC-01A	TCGA-A7-A4SC-01A	10.6	MX	3	Alive	14.65	0
TCGA-B6-A0WW-01A	TCGA-B6-A0WW-01A	10.6	MX	3	Dead	18.33	1
TCGA-D8-A1JB-01A	TCGA-D8-A1JB-01A	10.6	M0	1	Alive	55.45	0
TCGA-OL-A6VR-01A	TCGA-OL-A6VR-01A	10.61	MX	3	Alive	40.08	0
TCGA-E2-A1L7-01A	TCGA-E2-A1L7-01A	10.61	M0	1	Alive	60.32	0
TCGA-AO-A0JB-01A	TCGA-AO-A0JB-01A	10.62	M0	1	Alive	50.66	0
TCGA-A2-A0T6-01A	TCGA-A2-A0T6-01A	10.63	M0	1	Alive	18.89	0
TCGA-BH-A0BL-01A	TCGA-BH-A0BL-01A	10.63	M0	1	Alive	74.84	0
TCGA-GM-A2DD-01A	TCGA-GM-A2DD-01A	10.63	M0	1	Alive	74.97	0
TCGA-AO-A0JJ-01A	TCGA-AO-A0JJ-01A	10.64	M0	1	Alive	61.99	0
TCGA-E2-A159-01A	TCGA-E2-A159-01A	10.64	M0	1	Alive	25.03	0
TCGA-AC-A3BB-01A	TCGA-AC-A3BB-01A	10.64	MX	3	Alive	32.42	0
TCGA-GM-A4E0-01A	TCGA-GM-A4E0-01A	10.64	M0	1	Alive	71.98	0
TCGA-A2-A0ER-01A	TCGA-A2-A0ER-01A	10.65	M0	1	Alive	74.34	0
TCGA-E9-A1N5-01A	TCGA-E9-A1N5-01A	10.65	M0	1	Alive	36.79	0
TCGA-EW-A1P4-01A	TCGA-EW-A1P4-01A	10.65	M0	1	Alive	29.8	0
TCGA-HN-A2NL-01A	TCGA-HN-A2NL-01A	10.65	M0	1	Alive	2.6	0
TCGA-A8-A06O-01A	TCGA-A8-A06O-01A	10.66	M0	1	Alive	13.01	0
TCGA-AC-A2FO-01A	TCGA-AC-A2FO-01A	10.66	MX	3	Alive	74.08	0
TCGA-E2-A1L6-01A	TCGA-E2-A1L6-01A	10.66	M0	1	Alive	54.14	0
TCGA-AC-A2FM-01A	TCGA-AC-A2FM-01A	10.67	M0	1	Dead	26.02	1
TCGA-E2-A574-01A	TCGA-E2-A574-01A	10.67	M0	1	Alive	38.73	0
TCGA-A8-A07I-01A	TCGA-A8-A07I-01A	10.68	M0	1	Alive	13.99	0
TCGA-B6-A0IG-01A	TCGA-B6-A0IG-01A	10.68	M0	1	Dead	146.39	1
TCGA-AR-A1AT-01A	TCGA-AR-A1AT-01A	10.69	M0	1	Dead	41.79	1
TCGA-E9-A5FK-01A	TCGA-E9-A5FK-01A	10.69	M0	1	Alive	26.68	0
TCGA-AR-A0TS-01A	TCGA-AR-A0TS-01A	10.7	M0	1	Alive	84.03	0
TCGA-B6-A0IK-01A	TCGA-B6-A0IK-01A	10.7	M0	1	Dead	18.76	1
TCGA-BH-A0W4-01A	TCGA-BH-A0W4-01A	10.7	M0	1	Alive	24.93	0
TCGA-MS-A51U-01A	TCGA-MS-A51U-01A	10.7	M0	1	Alive	22.37	0
TCGA-OL-A5RZ-01A	TCGA-OL-A5RZ-01A	10.71	MX	3	Alive	22.31	0
TCGA-C8-A26W-01A	TCGA-C8-A26W-01A	10.71	M0	1	Alive	12.52	0
TCGA-AC-A2FE-01A	TCGA-AC-A2FE-01A	10.72	MX	3	Dead	86.6	1
TCGA-EW-A1PC-01B	TCGA-EW-A1PC-01B	10.72	MX	3	Alive	6.14	0
TCGA-EW-A6SA-01A	TCGA-EW-A6SA-01A	10.72	MX	3	Alive	16.75	0
TCGA-A2-A0T1-01A	TCGA-A2-A0T1-01A	10.72	M0	1	Alive	17.12	0
TCGA-A7-A0CJ-01A	TCGA-A7-A0CJ-01A	10.73	M0	1	Alive	30.58	0
TCGA-A8-A08B-01A	TCGA-A8-A08B-01A	10.73	M0	1	Alive	37.98	0
TCGA-AN-A0XT-01A	TCGA-AN-A0XT-01A	10.73	M0	1	Alive	0.33	0
TCGA-BH-A0GZ-01A	TCGA-BH-A0GZ-01A	10.73	M0	1	Alive	10.78	0
TCGA-E9-A1N6-01A	TCGA-E9-A1N6-01A	10.73	M0	1	Dead	22.27	1
TCGA-E9-A6HE-01A	TCGA-E9-A6HE-01A	10.73	MX	3	Alive	27.83	0
TCGA-E9-A22D-01A	TCGA-E9-A22D-01A	10.73	M0	1	Alive	41	0
TCGA-A2-A0EU-01A	TCGA-A2-A0EU-01A	10.74	M0	1	Alive	34.26	0
TCGA-BH-A0DG-01A	TCGA-BH-A0DG-01A	10.75	M0	1	Alive	67.05	0
TCGA-BH-A1FE-01A	TCGA-BH-A1FE-01A	10.75	M0	1	Dead	74.67	1
TCGA-LL-A9Q3-01A	TCGA-LL-A9Q3-01A	10.75	MX	3	Alive	17.48	0
TCGA-D8-A1Y0-01A	TCGA-D8-A1Y0-01A	10.76	MX	3	Alive	15.51	0
TCGA-GM-A2DC-01A	TCGA-GM-A2DC-01A	10.75	M0	1	Alive	83.28	0
TCGA-A2-A0YH-01A	TCGA-A2-A0YH-01A	10.77	M0	1	Alive	21.65	0
TCGA-BH-A0H7-01A	TCGA-BH-A0H7-01A	10.77	M0	1	Alive	23.06	0
TCGA-C8-A273-01A	TCGA-C8-A273-01A	10.77	M0	1	Alive	16.85	0
TCGA-BH-A0DE-01A	TCGA-BH-A0DE-01A	10.79	M0	1	Alive	77.92	0
TCGA-AQ-A04L-01B	TCGA-AQ-A04L-01B	10.79	MX	3	Alive	129.99	0
TCGA-A8-A076-01A	TCGA-A8-A076-01A	10.8	M0	1	Alive	53.94	0
TCGA-AR-A2LO-01A	TCGA-AR-A2LO-01A	10.8	M0	1	Alive	39.36	0
TCGA-BH-A1F8-01A	TCGA-BH-A1F8-01A	10.8	M0	1	Dead	25.07	1
TCGA-C8-A1HJ-01A	TCGA-C8-A1HJ-01A	10.8	M0	1	Alive	0.16	0
TCGA-E2-A1IH-01A	TCGA-E2-A1IH-01A	10.8	M0	1	Alive	33.71	0
TCGA-A7-A425-01A	TCGA-A7-A425-01A	10.8	MX	3	Alive	14.68	0
TCGA-E2-A14S-01A	TCGA-E2-A14S-01A		M0	1	Alive	33.15	0
TCGA-OL-A5S0-01A	TCGA-OL-A5S0-01A	10.8	MX	3	Alive	20.37	0
TCGA-A2-A4RW-01A	TCGA-A2-A4RW-01A	10.81	M0	1	Alive	7.29	0
TCGA-A8-A083-01A	TCGA-A8-A083-01A	10.81	M0	1	Alive	0	0
TCGA-E2-A14T-01A	TCGA-E2-A14T-01A	10.81	M0	1	Alive	75.92	0
TCGA-GM-A5PV-01A	TCGA-GM-A5PV-01A	10.81	M0	1	Alive	13.53	0
TCGA-A1-A0SB-01A	TCGA-A1-A0SB-01A	10.83	M0	1	Alive	8.51	0
TCGA-AC-A8OP-01A	TCGA-AC-A8OP-01A	10.83	MX	3	Alive	20.17	0
TCGA-AC-A2FK-01A	TCGA-AC-A2FK-01A	10.84	M0	1	Alive	87.06	0
TCGA-OK-A5Q2-01A	TCGA-OK-A5Q2-01A	10.84	MX	3	Alive	2.1	0
TCGA-AC-A2QH-01B	TCGA-AC-A2QH-01B	10.85	MX	3	Alive	33.02	0
TCGA-A2-A0CL-01A	TCGA-A2-A0CL-01A	10.86	M0	1	Alive	99.05	0
TCGA-A2-A0YF-01A	TCGA-A2-A0YF-01A	10.87	M0	1	Alive	50.43	0
TCGA-A2-A25A-01A	TCGA-A2-A25A-01A	10.87	M0	1	Alive	107.62	0
TCGA-BH-A0BF-01A	TCGA-BH-A0BF-01A	10.87	M0	1	Dead	43.5	1
TCGA-AN-A0XV-01A	TCGA-AN-A0XV-01A	10.88	M0	1	Alive	5.32	0
TCGA-AO-A03M-01B	TCGA-AO-A03M-01B	10.88	M0	1	Alive	61.3	0
TCGA-B6-A0WY-01A	TCGA-B6-A0WY-01A	10.88	M0	1	Dead	113.7	1
TCGA-C8-A1HG-01A	TCGA-C8-A1HG-01A	10.89	M0	1	Alive	11.33	0
TCGA-S3-A6ZH-01A	TCGA-S3-A6ZH-01A	10.89	MX	3	Alive	21.06	0
TCGA-A2-A0D3-01A	TCGA-A2-A0D3-01A	10.9	M0	1	Alive	61.53	0
TCGA-BH-A0HA-01A	TCGA-BH-A0HA-01A	10.9	M0	1	Alive	52.92	0
TCGA-BH-A0HB-01A	TCGA-BH-A0HB-01A	10.9	M0	1	Alive	26.48	0
TCGA-BH-A0HW-01A	TCGA-BH-A0HW-01A	10.9	M0	1	Alive	51.28	0
TCGA-EW-A1J5-01A	TCGA-EW-A1J5-01A	10.9	M0	1	Alive	15.67	0
TCGA-AR-A2LJ-01A	TCGA-AR-A2LJ-01A	10.9	MX	3	Alive	86.47	0
TCGA-D8-A1Y2-01A	TCGA-D8-A1Y2-01A	10.9	MX	3	Alive	14.22	0
TCGA-A2-A3XY-01A	TCGA-A2-A3XY-01A	10.91	M0	1	Dead	35.91	1
TCGA-BH-A0BW-01A	TCGA-BH-A0BW-01A	10.91	M0	1	Alive	77.89	0
TCGA-E9-A54Y-01A	TCGA-E9-A54Y-01A	10.91	M0	1	Alive	23.82	0
TCGA-A7-A5ZX-01A	TCGA-A7-A5ZX-01A	10.92	M0	1	Alive	11.04	0
TCGA-A8-A09K-01A	TCGA-A8-A09K-01A	10.93	M0	1	Alive	29.96	0
TCGA-BH-A0BO-01A	TCGA-BH-A0BO-01A	10.94	M0	1	Alive	72.17	0
TCGA-EW-A1IX-01A	TCGA-EW-A1IX-01A	10.94	MX	3	Alive	39.68	0
TCGA-A2-A1G4-01A	TCGA-A2-A1G4-01A	10.95	M0	1	Alive	19.55	0
TCGA-AO-A1KO-01A	TCGA-AO-A1KO-01A	10.95	M0	1	Alive	20.43	0
TCGA-AR-A1AM-01A	TCGA-AR-A1AM-01A	10.95	M0	1	Alive	98.26	0
TCGA-B6-A0WX-01A	TCGA-B6-A0WX-01A	10.95	M0	1	Dead	20.99	1
TCGA-BH-A0W3-01A	TCGA-BH-A0W3-01A	10.95	M0	1	Alive	23.92	0
TCGA-BH-A204-01A	TCGA-BH-A204-01A	10.96	M0	1	Dead	83.25	1
TCGA-A7-A426-01A	TCGA-A7-A426-01A	10.96	MX	3	Alive	11.96	0
TCGA-D8-A1XK-01A	TCGA-D8-A1XK-01A	10.96	MX	3	Alive	14.49	0
TCGA-A8-A0AB-01A	TCGA-A8-A0AB-01A	10.97	M0	1	Alive	17.02	0
TCGA-BH-A18Q-01A	TCGA-BH-A18Q-01A	10.97	M0	1	Dead	55.58	1
TCGA-C8-A26Y-01A	TCGA-C8-A26Y-01A	10.97	M0	1	Alive	12.94	0
TCGA-A2-A04P-01A	TCGA-A2-A04P-01A	10.98	M0	1	Dead	18	1
TCGA-D8-A141-01A	TCGA-D8-A141-01A	10.98	M0	1	Alive	20.57	0
TCGA-E2-A15P-01A	TCGA-E2-A15P-01A	10.98	M0	1	Alive	19.55	0
TCGA-AC-A8OQ-01A	TCGA-AC-A8OQ-01A	10.98	MX	3	Alive	1.12	0
TCGA-OL-A5D8-01A	TCGA-OL-A5D8-01A	10.98	MX	3	Alive	31.96	0
TCGA-A7-A5ZW-01A	TCGA-A7-A5ZW-01A	10.99	M0	1	Alive	10.71	0
TCGA-A7-A0CE-01A	TCGA-A7-A0CE-01A	11	M0	1	Alive	35.28	0
TCGA-A7-A5ZV-01A	TCGA-A7-A5ZV-01A	11	M0	1	Alive	12.09	0
TCGA-AQ-A54N-01A	TCGA-AQ-A54N-01A	11	M0	1	Alive	2.56	0
TCGA-BH-A6R9-01A	TCGA-BH-A6R9-01A	11.01	M0	1	Alive	5.26	0
TCGA-E9-A227-01A	TCGA-E9-A227-01A	11.01	M0	1	Alive	32.03	0
TCGA-GM-A3NY-01A	TCGA-GM-A3NY-01A	11.01	M0	1	Alive	38.17	0
TCGA-A2-A0EW-01A	TCGA-A2-A0EW-01A	11.02	M0	1	Dead	61.89	1
TCGA-AN-A0XN-01A	TCGA-AN-A0XN-01A	11.03	M0	1	Alive	0.33	0
TCGA-AR-A1AR-01A	TCGA-AR-A1AR-01A	11.03	M0	1	Dead	17.21	1
TCGA-3C-AALI-01A	TCGA-3C-AALI-01A	11.04	M0	1	Alive	131.57	0
TCGA-AO-A0J4-01A	TCGA-AO-A0J4-01A	11.06	M0	1	Alive	52.14	0
TCGA-A8-A095-01A	TCGA-A8-A095-01A	11.07	M0	1	Alive	41.95	0
TCGA-LD-A74U-01A	TCGA-LD-A74U-01A	11.07	M0	1	Alive	13.21	0
TCGA-A2-A4S2-01A	TCGA-A2-A4S2-01A	11.08	M0	1	Alive	21.12	0
TCGA-E9-A1QZ-01A	TCGA-E9-A1QZ-01A	11.08	M0	1	Alive	24.8	0
TCGA-GM-A2DH-01A	TCGA-GM-A2DH-01A	11.08	M0	1	Alive	72.04	0
TCGA-A8-A08I-01A	TCGA-A8-A08I-01A	11.09	M0	1	Alive	11.99	0
TCGA-E2-A1IE-01A	TCGA-E2-A1IE-01A	11.09	M0	1	Alive	77.6	0
TCGA-BH-A0DT-01A	TCGA-BH-A0DT-01A	11.11	M0	1	Alive	78.94	0
TCGA-E2-A10C-01A	TCGA-E2-A10C-01A	11.11	M0	1	Alive	40.08	0
TCGA-A7-A4SA-01A	TCGA-A7-A4SA-01A	11.13	M0	1	Alive	14.91	0
TCGA-EW-A1IZ-01A	TCGA-EW-A1IZ-01A	11.11	MX	3	Alive	18.2	0
TCGA-GM-A3XN-01A	TCGA-GM-A3XN-01A	11.13	M0	1	Alive	66.33	0
TCGA-A2-A0CU-01A	TCGA-A2-A0CU-01A	11.14	M0	1	Dead	5.19	1
TCGA-A8-A08G-01A	TCGA-A8-A08G-01A	11.14	M0	1	Alive	19.94	0
TCGA-BH-A1EV-01A	TCGA-BH-A1EV-01A	11.14	M0	1	Dead	11.99	1
TCGA-E2-A15C-01A	TCGA-E2-A15C-01A	11.14	M0	1	Alive	22.8	0
TCGA-D8-A1XD-01A	TCGA-D8-A1XD-01A	11.15	M0	1	Alive	17.15	0
TCGA-E2-A3DX-01A	TCGA-E2-A3DX-01A	11.15	M0	1	Alive	43.53	0
TCGA-A2-A0D2-01A	TCGA-A2-A0D2-01A	11.16	M0	1	Alive	33.74	0
TCGA-BH-A1FB-01A	TCGA-BH-A1FB-01A	11.16	M0	1	Dead	120.53	1
TCGA-C8-A132-01A	TCGA-C8-A132-01A	11.16	M0	1	Alive	12.58	0
TCGA-A2-A3XZ-01A	TCGA-A2-A3XZ-01A	11.17	M0	1	Alive	50.33	0
TCGA-LL-A73Y-01A	TCGA-LL-A73Y-01A	11.16	MX	3	Alive	15.67	0
TCGA-E2-A150-01A	TCGA-E2-A150-01A	11.17	M0	1	Alive	63.57	0
TCGA-A2-A0EN-01A	TCGA-A2-A0EN-01A	11.18	M0	1	Alive	134.3	0
TCGA-A1-A0SF-01A	TCGA-A1-A0SF-01A	11.2	M0	1	Alive	48.06	0
TCGA-AC-A2FB-01A	TCGA-AC-A2FB-01A	11.18	MX	3	Alive	40.54	0
TCGA-A2-A0CQ-01A	TCGA-A2-A0CQ-01A	11.2	M0	1	Alive	88.53	0
TCGA-A8-A086-01A	TCGA-A8-A086-01A	11.21	M0	1	Alive	13.01	0
TCGA-AC-A8OS-01A	TCGA-AC-A8OS-01A	11.2	MX	3	Alive	2.3	0
TCGA-AR-A1AP-01A	TCGA-AR-A1AP-01A	11.21	M0	1	Alive	93.82	0
TCGA-C8-A1HM-01A	TCGA-C8-A1HM-01A	11.23	M0	1	Alive	12.32	0
TCGA-AR-A1AL-01A	TCGA-AR-A1AL-01A	11.24	M0	1	Alive	97.6	0
TCGA-BH-A0B0-01A	TCGA-BH-A0B0-01A	11.24	M0	1	Alive	81.37	0
TCGA-JL-A3YX-01A	TCGA-JL-A3YX-01A	11.24	M0	1	Alive	11.56	0
TCGA-A2-A0EY-01A	TCGA-A2-A0EY-01A	11.26	M0	1	Alive	63.24	0
TCGA-BH-A0DX-01A	TCGA-BH-A0DX-01A	11.26	M0	1	Alive	70.83	0
TCGA-BH-A0C0-01A	TCGA-BH-A0C0-01A	11.27	M0	1	Alive	41.72	0
TCGA-BH-A0DK-01A	TCGA-BH-A0DK-01A	11.27	M0	1	Alive	13.9	0
TCGA-AR-A24N-01A	TCGA-AR-A24N-01A	11.28	M0	1	Alive	99.7	0
TCGA-BH-A42V-01A	TCGA-BH-A42V-01A	11.29	M0	1	Alive	20.86	0
TCGA-AO-A12A-01A	TCGA-AO-A12A-01A	11.3	M0	1	Alive	102.23	0
TCGA-AC-A23G-01A	TCGA-AC-A23G-01A	11.29	MX	3	Alive	73.85	0
TCGA-AR-A0TX-01A	TCGA-AR-A0TX-01A	11.3	M0	1	Alive	64.78	0
TCGA-AR-A5QP-01A	TCGA-AR-A5QP-01A	11.31	M0	1	Alive	38.93	0
TCGA-D8-A1XF-01A	TCGA-D8-A1XF-01A	11.32	M0	1	Alive	15.21	0
TCGA-A2-A0T3-01A	TCGA-A2-A0T3-01A	11.33	M0	1	Alive	49.8	0
TCGA-BH-A0H3-01A	TCGA-BH-A0H3-01A	11.33	M0	1	Alive	63.34	0
TCGA-OL-A5RU-01A	TCGA-OL-A5RU-01A	11.32	MX	3	Alive	40.05	0
TCGA-EW-A1PH-01A	TCGA-EW-A1PH-01A	11.33	M0	1	Alive	19.94	0
TCGA-E9-A2JS-01A	TCGA-E9-A2JS-01A	11.34	M0	1	Dead	29.7	1
TCGA-A2-A0CZ-01A	TCGA-A2-A0CZ-01A	11.35	M0	1	Alive	53.09	0
TCGA-E9-A245-01A	TCGA-E9-A245-01A	11.14	M0	1	Dead		1
TCGA-BH-A28O-01A	TCGA-BH-A28O-01A	11.35	M0	1	Alive	36.79	0
TCGA-D8-A1XB-01A	TCGA-D8-A1XB-01A	11.35	M0	1	Alive	18.13	0
TCGA-A2-A259-01A	TCGA-A2-A259-01A	11.36	M0	1	Alive	52.43	0
TCGA-AO-A0J8-01A	TCGA-AO-A0J8-01A	11.36	M0	1	Alive	22.34	0
TCGA-B6-A0WS-01A	TCGA-B6-A0WS-01A	11.35	MX	3	Dead	97.4	1
TCGA-BH-A0AY-01A	TCGA-BH-A0AY-01A	11.36	M0	1	Alive	25.53	0
TCGA-A2-A0T7-01A	TCGA-A2-A0T7-01A	11.37	M0	1	Alive	20.73	0
TCGA-A2-A1FV-01A	TCGA-A2-A1FV-01A	11.37	M0	1	Alive	23.46	0
TCGA-AC-A2FG-01A	TCGA-AC-A2FG-01A	11.36	MX	3	Alive	60.87	0
TCGA-AR-A1AX-01A	TCGA-AR-A1AX-01A	11.37	M0	1	Alive	86.37	0
TCGA-E2-A1B5-01A	TCGA-E2-A1B5-01A	11.37	M0	1	Alive	32.33	0
TCGA-PL-A8LV-01A	TCGA-PL-A8LV-01A	11.37	M0	1	Alive	-0.23	0
TCGA-S3-AA10-01A	TCGA-S3-AA10-01A	11.38	M0	1	Alive	19.25	0
TCGA-D8-A27R-01A	TCGA-D8-A27R-01A	11.4	M0	1	Alive	10.09	0
TCGA-LD-A66U-01A	TCGA-LD-A66U-01A	11.37	MX	3	Alive	21.22	0
TCGA-S3-AA12-01A	TCGA-S3-AA12-01A	11.37	MX	3	Alive	18.86	0
TCGA-GM-A2DF-01A	TCGA-GM-A2DF-01A	11.41	M0	1	Alive	70.8	0
TCGA-A2-A4RX-01A	TCGA-A2-A4RX-01A	11.42	M0	1	Alive	24.38	0
TCGA-A7-A6VX-01A	TCGA-A7-A6VX-01A	11.42	M0	1	Alive	10.41	0
TCGA-A8-A08F-01A	TCGA-A8-A08F-01A	11.42	M0	1	Alive	32.98	0
TCGA-A8-A08L-01A	TCGA-A8-A08L-01A	11.42	M0	1	Dead	9.99	1
TCGA-A7-A3IZ-01A	TCGA-A7-A3IZ-01A	11.43	M0	1	Alive	10.58	0
TCGA-AR-A2LH-01A	TCGA-AR-A2LH-01A	11.43	M0	1	Dead	20.24	1
TCGA-B6-A400-01A	TCGA-B6-A400-01A	11.45	M0	1	Alive	7.06	0
TCGA-E2-A14P-01A	TCGA-E2-A14P-01A	11.45	M0	1	Alive	40.93	0
TCGA-LL-A440-01A	TCGA-LL-A440-01A	11.44	MX	3	Alive	24.93	0
TCGA-LD-A7W6-01A	TCGA-LD-A7W6-01A	11.45	M0	1	Alive	13.27	0
TCGA-BH-A0E6-01A	TCGA-BH-A0E6-01A	11.46	M0	1	Alive	9.63	0
TCGA-BH-A8G0-01A	TCGA-BH-A8G0-01A	11.46	M0	1	Alive	21.75	0
TCGA-B6-A0IN-01A	TCGA-B6-A0IN-01A	11.45	MX	3	Dead	84.53	1
TCGA-AR-A2LM-01A	TCGA-AR-A2LM-01A	11.47	M0	1	Alive	63.57	0
TCGA-BH-A0RX-01A	TCGA-BH-A0RX-01A	11.47	M0	1	Alive	5.58	0
TCGA-D8-A1JC-01A	TCGA-D8-A1JC-01A	11.47	M0	1	Alive	15.77	0
TCGA-EW-A1PA-01A	TCGA-EW-A1PA-01A	11.47	M0	1	Alive	18.89	0
TCGA-E2-A14X-01A	TCGA-E2-A14X-01A	11.49	M0	1	Alive	31.93	0
TCGA-BH-A1FC-01A	TCGA-BH-A1FC-01A	11.5	M0	1	Dead	114.06	1
TCGA-AO-A1KT-01A	TCGA-AO-A1KT-01A	11.51	M0	1	Alive	17.77	0
TCGA-GI-A2C9-01A	TCGA-GI-A2C9-01A	11.49	MX	3	Alive	109.79	0
TCGA-D8-A27K-01A	TCGA-D8-A27K-01A	11.51	M0	1	Alive	48	0
TCGA-GM-A3NW-01A	TCGA-GM-A3NW-01A	11.52	M0	1	Alive	110.41	0
TCGA-LL-A7T0-01A	TCGA-LL-A7T0-01A	11.52	M0	1	Alive	12.35	0
TCGA-AO-A0J9-01A	TCGA-AO-A0J9-01A	11.55	M0	1	Alive	52.99	0
TCGA-BH-A0BG-01A	TCGA-BH-A0BG-01A	11.56	M0	1	Alive	61.47	0
TCGA-D8-A1JI-01A	TCGA-D8-A1JI-01A	11.53	MX	3	Alive	18.96	0
TCGA-E2-A14U-01A	TCGA-E2-A14U-01A	11.56	M0	1	Alive	43.3	0
TCGA-BH-A0B7-01A	TCGA-BH-A0B7-01A	11.57	M0	1	Alive	84.07	0
TCGA-BH-A1F0-01A	TCGA-BH-A1F0-01A	11.59	M0	1	Dead	25.79	1
TCGA-E9-A1N8-01A	TCGA-E9-A1N8-01A	11.59	M0	1	Alive	34.13	0
TCGA-5T-A9QA-01A	TCGA-5T-A9QA-01A	11.57	MX	3	Alive	9.95	0
TCGA-AC-A3YI-01A	TCGA-AC-A3YI-01A	11.58	MX	3	Alive	23.23	0
TCGA-B6-A0RH-01A	TCGA-B6-A0RH-01A	11.6	M0	1	Dead	212.09	1
TCGA-B6-A0RV-01A	TCGA-B6-A0RV-01A	11.6	M0	1	Alive	169.38	0
TCGA-BH-A28Q-01A	TCGA-BH-A28Q-01A	11.64	M0	1	Alive	36.76	0
TCGA-D8-A145-01A	TCGA-D8-A145-01A	11.64	M0	1	Alive	13.47	0
TCGA-A7-A13H-01A	TCGA-A7-A13H-01A	11.6	MX	3	Alive	29.53	0
TCGA-Z7-A8R5-01A	TCGA-Z7-A8R5-01A	11.6	MX	3	Alive	107.98	0
TCGA-LL-A7SZ-01A	TCGA-LL-A7SZ-01A	11.62	MX	3	Alive	19.51	0
TCGA-E2-A1B1-01A	TCGA-E2-A1B1-01A	11.64	M0	1	Alive	87.16	0
TCGA-BH-A8FZ-01A	TCGA-BH-A8FZ-01A	11.66	M0	1	Alive	18.86	0
TCGA-AO-A03R-01A	TCGA-AO-A03R-01A	11.67	M0	1	Alive	68.69	0
TCGA-LD-A9QF-01A	TCGA-LD-A9QF-01A	11.67	M0	1	Alive	10.61	0
TCGA-A8-A07L-01A	TCGA-A8-A07L-01A	11.68	M0	1	Alive	32.03	0
TCGA-E9-A3HO-01A	TCGA-E9-A3HO-01A	11.68	M0	1	Alive	38.04	0
TCGA-LD-A7W5-01A	TCGA-LD-A7W5-01A		M0	1	Alive	7.1	0
TCGA-AN-A0AJ-01A	TCGA-AN-A0AJ-01A	11.7	M0	1	Alive	9.95	0
TCGA-BH-A42U-01A	TCGA-BH-A42U-01A	11.7	M0	1	Alive	110.51	0
TCGA-S3-AA0Z-01A	TCGA-S3-AA0Z-01A	11.72	M0	1	Alive	20.66	0
TCGA-AO-A03T-01A	TCGA-AO-A03T-01A	11.73	M0	1	Alive	69.78	0
TCGA-A2-A04N-01A	TCGA-A2-A04N-01A	11.74	M0	1	Alive	143.04	0
TCGA-BH-A0HF-01A	TCGA-BH-A0HF-01A	11.76	M0	1	Alive	23.88	0
TCGA-E9-A1R2-01A	TCGA-E9-A1R2-01A	11.72	MX	3	Alive	34.92	0
TCGA-BH-A0HQ-01A	TCGA-BH-A0HQ-01A	11.76	M0	1	Alive	36.83	0
TCGA-A7-A13E-01A	TCGA-A7-A13E-01A	11.73	MX	3	Dead	20.17	1
TCGA-E9-A228-01A	TCGA-E9-A228-01A	11.76	M0	1	Alive	42.21	0
TCGA-BH-A1FD-01A	TCGA-BH-A1FD-01A	11.77	M0	1	Dead	33.15	1
TCGA-E9-A243-01A	TCGA-E9-A243-01A	11.77	M0	1	Alive	20.11	0
TCGA-AR-A24P-01A	TCGA-AR-A24P-01A	11.78	M0	1	Alive	2.76	0
TCGA-BH-A0EI-01A	TCGA-BH-A0EI-01A	11.81	M0	1	Alive	63.27	0
TCGA-D8-A1JL-01A	TCGA-D8-A1JL-01A	11.81	M0	1	Alive	20.07	0
TCGA-OL-A6VQ-01A	TCGA-OL-A6VQ-01A	11.77	MX	3	Alive	19.71	0
TCGA-A2-A0D1-01A	TCGA-A2-A0D1-01A	11.82	M0	1	Alive	34.53	0
TCGA-A7-A0DB-01A	TCGA-A7-A0DB-01A	11.83	M0	1	Alive	33.08	0
TCGA-AO-A1KQ-01A	TCGA-AO-A1KQ-01A	11.83	M0	1	Alive	61.83	0
TCGA-B6-A401-01A	TCGA-B6-A401-01A	11.83	M0	1	Alive	85.28	0
TCGA-AR-A2LN-01A	TCGA-AR-A2LN-01A	11.85	M0	1	Alive	38.14	0
TCGA-BH-A0HK-01A	TCGA-BH-A0HK-01A	11.85	M0	1	Alive	5.85	0
TCGA-C8-A1HO-01A	TCGA-C8-A1HO-01A	11.85	M0	1	Alive	12.32	0
TCGA-C8-A3M8-01A	TCGA-C8-A3M8-01A	11.85	M0	1	Alive	12.94	0
TCGA-AQ-A04J-01A	TCGA-AQ-A04J-01A	11.88	M0	1	Alive	26.91	0
TCGA-GM-A2DN-01A	TCGA-GM-A2DN-01A	11.88	M0	1	Alive	101.54	0
TCGA-A2-A0ES-01A	TCGA-A2-A0ES-01A	11.89	M0	1	Alive	71.94	0
TCGA-XX-A899-01A	TCGA-XX-A899-01A	11.85	MX	3	Alive	15.34	0
TCGA-OL-A5RX-01A	TCGA-OL-A5RX-01A	11.86	MX	3	Alive	28.84	0
TCGA-A8-A08Z-01A	TCGA-A8-A08Z-01A	11.91	M0	1	Alive	39.98	0
TCGA-BH-A0B6-01A	TCGA-BH-A0B6-01A	11.92	M0	1	Alive	81.57	0
TCGA-BH-A203-01A	TCGA-BH-A203-01A	11.92	M0	1	Dead	38.57	1
TCGA-LL-A5YO-01A	TCGA-LL-A5YO-01A	11.89	MX	3	Alive	14.45	0
TCGA-E9-A22A-01A	TCGA-E9-A22A-01A	11.92	M0	1	Alive	39.06	0
TCGA-EW-A1P6-01A	TCGA-EW-A1P6-01A	11.92	M0	1	Alive	18.46	0
TCGA-E2-A1LH-01A	TCGA-E2-A1LH-01A	11.93	M0	1	Alive	106.67	0
TCGA-PL-A8LY-01A	TCGA-PL-A8LY-01A	11.93	M0	1	Alive	0.26	0
TCGA-B6-A1KC-01B	TCGA-B6-A1KC-01B	11.94	M0	1	Alive	43.56	0
TCGA-BH-A0DL-01A	TCGA-BH-A0DL-01A	11.96	M0	1	Alive	78.22	0
TCGA-AO-A129-01A	TCGA-AO-A129-01A	11.97	M0	1	Alive	107.95	0
TCGA-BH-A0BS-11A	TCGA-BH-A0BS-11A	11.97	M0	1	Alive	85.81	0
TCGA-A2-A0CO-01A	TCGA-A2-A0CO-01A	11.98	M0	1	Dead	114.72	1
TCGA-AC-A2QJ-01A	TCGA-AC-A2QJ-01A	12.02	M0	1	Dead	14.65	1
TCGA-AO-A0JI-01A	TCGA-AO-A0JI-01A	12.04	M0	1	Alive	50.2	0
TCGA-BH-A209-01A	TCGA-BH-A209-01A	12.04	M0	1	Dead	130.06	1
TCGA-AO-A1KP-01A	TCGA-AO-A1KP-01A	12.06	M0	1	Alive	97.01	0
TCGA-BH-A0E2-01A	TCGA-BH-A0E2-01A	12.07	M0	1	Alive	14.29	0
TCGA-AO-A0J3-01A	TCGA-AO-A0J3-01A	12.08	M0	1	Alive	21.39	0
TCGA-A2-A3XT-01A	TCGA-A2-A3XT-01A	12.12	M0	1	Alive	91	0
TCGA-BH-A1ES-01A	TCGA-BH-A1ES-01A	12.13	M0	1	Dead	113.73	1
TCGA-EW-A6SB-01A	TCGA-EW-A6SB-01A	12.13	M0	1	Alive	24.97	0
TCGA-GM-A2DB-01A	TCGA-GM-A2DB-01A	12.17	M0	1	Alive	79.04	0
TCGA-E2-A1LL-01A	TCGA-E2-A1LL-01A	12.09	MX	3	Alive	43	0
TCGA-LL-A441-01A	TCGA-LL-A441-01A	12.1	MX	3	Alive	32.72	0
TCGA-E2-A1LK-01A	TCGA-E2-A1LK-01A	12.18	M0	1	Dead	8.74	1
TCGA-AC-A3OD-01B	TCGA-AC-A3OD-01B	12.12	MX	3	Alive	14.82	0
TCGA-E9-A1RB-01A	TCGA-E9-A1RB-01A	12.19	M0	1	Dead	32.06	1
TCGA-E9-A295-01A	TCGA-E9-A295-01A	12.2	M0	1	Alive	12.32	0
TCGA-A8-A09C-01A	TCGA-A8-A09C-01A		MX	3	Alive	1.02	0
TCGA-A7-A6VW-01A	TCGA-A7-A6VW-01A	12.21	M0	1	Alive	9.36	0
TCGA-BH-A0H5-01A	TCGA-BH-A0H5-01A	12.21	M0	1	Alive	53.22	0
TCGA-S3-A6ZG-01A	TCGA-S3-A6ZG-01A	12.21	M0	1	Alive	18.46	0
TCGA-B6-A0RT-01A	TCGA-B6-A0RT-01A	12.22	M0	1	Alive	89.39	0
TCGA-A1-A0SK-01A	TCGA-A1-A0SK-01A	12.23	M0	1	Dead	31.77	1
TCGA-AO-A0J7-01A	TCGA-AO-A0J7-01A	12.23	M0	1	Alive	20.3	0
TCGA-E2-A1BD-01A	TCGA-E2-A1BD-01A	12.25	M0	1	Alive	37.22	0
TCGA-A2-A04U-01A	TCGA-A2-A04U-01A	12.27	M0	1	Alive	87.19	0
TCGA-B6-A1KN-01A	TCGA-B6-A1KN-01A	12.27	M0	1	Alive	139.06	0
TCGA-A2-A0T5-01A	TCGA-A2-A0T5-01A	12.3	M0	1	Alive	17.44	0
TCGA-AC-A3EH-01A	TCGA-AC-A3EH-01A	12.31	M0	1	Dead	6.47	1
TCGA-E9-A1RA-01A	TCGA-E9-A1RA-01A	12.31	M0	1	Alive	44.97	0
TCGA-GM-A3XL-01A	TCGA-GM-A3XL-01A	12.32	M0	1	Alive	69.25	0
TCGA-3C-AALJ-01A	TCGA-3C-AALJ-01A	12.36	M0	1	Alive	48.42	0
TCGA-AR-A1AQ-01A	TCGA-AR-A1AQ-01A	12.36	M0	1	Alive	99.24	0
TCGA-A2-A04Q-01A	TCGA-A2-A04Q-01A	12.4	M0	1	Alive	78.35	0
TCGA-E9-A1N3-01A	TCGA-E9-A1N3-01A	12.42	M0	1	Alive	34.79	0
TCGA-A1-A0SG-01A	TCGA-A1-A0SG-01A	12.43	M0	1	Alive	14.26	0
TCGA-B6-A0WT-01A	TCGA-B6-A0WT-01A	12.43	M0	1	Alive	188.53	0
TCGA-AR-A0U3-01A	TCGA-AR-A0U3-01A	12.44	M0	1	Alive	134.03	0
TCGA-E9-A1RC-01A	TCGA-E9-A1RC-01A	12.48	M0	1	Alive	40.21	0
TCGA-B6-A0RL-01A	TCGA-B6-A0RL-01A	12.49	M0	1	Dead	81.11	1
TCGA-A2-A0CR-01A	TCGA-A2-A0CR-01A	12.5	M0	1	Alive	107.85	0
TCGA-BH-A0E0-01A	TCGA-BH-A0E0-01A	12.5	M0	1	Alive	4.4	0
TCGA-GM-A2DI-01A	TCGA-GM-A2DI-01A	12.5	M0	1	Alive	85.09	0
TCGA-AC-A5EI-01A	TCGA-AC-A5EI-01A		MX	3	Alive	14.52	0
TCGA-E2-A9RU-01A	TCGA-E2-A9RU-01A	12.45	MX	3	Alive	17.67	0
TCGA-AC-A7VB-01A	TCGA-AC-A7VB-01A	12.47	MX	3	Alive	8.21	0
TCGA-A8-A082-01A	TCGA-A8-A082-01A	12.51	M0	1	Alive	18.04	0
TCGA-E2-A15R-01A	TCGA-E2-A15R-01A	12.52	M0	1	Alive	56.9	0
TCGA-OL-A5RY-01A	TCGA-OL-A5RY-01A	12.49	MX	3	Alive	24.7	0
TCGA-AR-A251-01A	TCGA-AR-A251-01A	12.55	M0	1	Alive	99.54	0
TCGA-E9-A5FL-01A	TCGA-E9-A5FL-01A	12.57	M0	1	Alive	0.79	0
TCGA-AR-A1AW-01A	TCGA-AR-A1AW-01A	12.58	M0	1	Alive	86.47	0
TCGA-E2-A105-01A	TCGA-E2-A105-01A	12.6	M0	1	Alive	42.97	0
TCGA-E2-A15F-01A	TCGA-E2-A15F-01A	12.61	M0	1	Alive	21.62	0
TCGA-BH-A0DI-01A	TCGA-BH-A0DI-01A	12.64	M0	1	Alive	29.96	0
TCGA-AC-A2BM-01A	TCGA-AC-A2BM-01A	12.55	MX	3	Alive	99.28	0
TCGA-A2-A4RY-01A	TCGA-A2-A4RY-01A	12.66	M0	1	Alive	21.29	0
TCGA-BH-A0DZ-11A	TCGA-BH-A0DZ-11A	12.66	M0	1	Alive	16.26	0
TCGA-A7-A0DC-01A	TCGA-A7-A0DC-01A	12.69	M0	1	Alive	29.76	0
TCGA-AR-A1AY-01A	TCGA-AR-A1AY-01A	12.7	M0	1	Alive	33.71	0
TCGA-A2-A0YK-01A	TCGA-A2-A0YK-01A	12.73	M0	1	Alive	19.32	0
TCGA-AR-A5QN-01A	TCGA-AR-A5QN-01A	12.73	M0	1	Alive	33.28	0
TCGA-AC-A6NO-01A	TCGA-AC-A6NO-01A	12.65	MX	3	Alive	1.68	0
TCGA-BH-A0W5-01A	TCGA-BH-A0W5-01A	12.73	M0	1	Alive	42.31	0
TCGA-E2-A56Z-01A	TCGA-E2-A56Z-01A	12.74	M0	1	Alive	8.28	0
TCGA-BH-A0DP-01A	TCGA-BH-A0DP-01A	12.76	M0	1	Alive	15.64	0
TCGA-A8-A08H-01A	TCGA-A8-A08H-01A	12.78	M0	1	Alive	0	0
TCGA-BH-A0BQ-01A	TCGA-BH-A0BQ-01A	12.81	M0	1	Alive	74.08	0
TCGA-C8-A12V-01A	TCGA-C8-A12V-01A	12.83	M0	1	Alive	12.65	0
TCGA-LL-A5YN-01A	TCGA-LL-A5YN-01A	12.83	M0	1	Alive	14.68	0
TCGA-A8-A07O-01A	TCGA-A8-A07O-01A	12.85	M0	1	Alive	9.99	0
TCGA-BH-A0DS-01A	TCGA-BH-A0DS-01A	12.87	M0	1	Alive	2.56	0
TCGA-E2-A15I-01A	TCGA-E2-A15I-01A	12.91	M0	1	Alive	55.58	0
TCGA-A2-A0EP-01A	TCGA-A2-A0EP-01A	12.96	M0	1	Alive	118.36	0
TCGA-C8-A12X-01A	TCGA-C8-A12X-01A	12.99	M0	1	Alive	12.65	0
TCGA-EW-A1IW-01A	TCGA-EW-A1IW-01A	12.78	MX	3	Alive	12.19	0
TCGA-E9-A249-01A	TCGA-E9-A249-01A	13.07	M0	1	Alive	7.13	0
TCGA-A7-A0D9-01A	TCGA-A7-A0D9-01A	13.09	M0	1	Alive	37.42	0
TCGA-A2-A0CV-01A	TCGA-A2-A0CV-01A	13.1	M0	1	Alive	98.92	0
TCGA-E9-A2JT-01A	TCGA-E9-A2JT-01A	13.1	M0	1	Alive	9.46	0
TCGA-E9-A1NI-01A	TCGA-E9-A1NI-01A	13.11	M0	1	Alive	9.86	0
TCGA-EW-A1P8-01A	TCGA-EW-A1P8-01A	13.12	M0	1	Dead	7.85	1
TCGA-OL-A66J-01A	TCGA-OL-A66J-01A	12.95	MX	3	Alive	65.57	0
TCGA-AR-A1AJ-01A	TCGA-AR-A1AJ-01A	13.16	M0	1	Alive	100.92	0
TCGA-A2-A25F-01A	TCGA-A2-A25F-01A	13.19	M0	1	Alive	10.58	0
TCGA-A8-A07U-01A	TCGA-A8-A07U-01A	13.2	M0	1	Alive	24.97	0
TCGA-B6-A0I5-01A	TCGA-B6-A0I5-01A	13.22	M0	1	Alive	281.08	0
TCGA-C8-A27A-01A	TCGA-C8-A27A-01A	13.23	M0	1	Alive	24.54	0
TCGA-A2-A04T-01A	TCGA-A2-A04T-01A	13.24	M0	1	Alive	73.78	0
TCGA-A7-A26F-01B	TCGA-A7-A26F-01B	13.24	M0	1	Alive	24.24	0
TCGA-A2-A3Y0-01A	TCGA-A2-A3Y0-01A	13.25	M0	1	Alive	50.79	0
TCGA-WT-AB41-01A	TCGA-WT-AB41-01A	13.13	MX	3	Alive	52.92	0
TCGA-EW-A1P7-01A	TCGA-EW-A1P7-01A	13.29	M0	1	Alive	30.06	0
TCGA-B6-A40B-01A	TCGA-B6-A40B-01A	13.3	M0	1	Alive	103.55	0
TCGA-A2-A0CM-01A	TCGA-A2-A0CM-01A	13.31	M0	1	Dead	24.77	1
TCGA-A2-A0ST-01A	TCGA-A2-A0ST-01A	13.31	M0	1	Alive	99.11	0
TCGA-A8-A081-01A	TCGA-A8-A081-01A	13.4	M0	1	Alive	0	0
TCGA-C8-A134-01A	TCGA-C8-A134-01A	13.4	M0	1	Alive	12.58	0
TCGA-B6-A0IJ-01A	TCGA-B6-A0IJ-01A	13.43	M0	1	Alive	233.44	0
TCGA-E2-A1AZ-01A	TCGA-E2-A1AZ-01A	13.46	M0	1	Alive	76.51	0
TCGA-EW-A1IY-01A	TCGA-EW-A1IY-01A	13.26	MX	3	Alive	8.48	0
TCGA-AO-A0J6-01A	TCGA-AO-A0J6-01A	13.47	M0	1	Alive	37.45	0
TCGA-BH-A0B5-01A	TCGA-BH-A0B5-01A	13.47	M0	1	Alive	70.17	0
TCGA-D8-A1Y3-01A	TCGA-D8-A1Y3-01A	13.3	MX	3	Alive	14.13	0
TCGA-E9-A3QA-01A	TCGA-E9-A3QA-01A	13.47	M0	1	Alive	30.16	0
TCGA-GM-A2DO-01A	TCGA-GM-A2DO-01A	13.48	M0	1	Alive	85.28	0
TCGA-A7-A4SD-01A	TCGA-A7-A4SD-01A	13.55	M0	1	Alive	14.49	0
TCGA-EW-A1PB-01A	TCGA-EW-A1PB-01A	13.39	MX	3	Alive	19.97	0
TCGA-E2-A570-01A	TCGA-E2-A570-01A	13.55	M0	1	Alive	30.58	0
TCGA-A2-A1G1-01A	TCGA-A2-A1G1-01A	13.62	M0	1	Alive	19.19	0
TCGA-BH-A0GY-01A	TCGA-BH-A0GY-01A	13.62	M0	1	Alive	30.32	0
TCGA-AC-A3QQ-01B	TCGA-AC-A3QQ-01B	13.45	MX	3	Alive	24.11	0
TCGA-AR-A1AO-01A	TCGA-AR-A1AO-01A	13.69	M0	1	Alive	86.01	0
TCGA-E2-A15D-01A	TCGA-E2-A15D-01A	13.69	M0	1	Alive	17.28	0
TCGA-AR-A5QQ-01A	TCGA-AR-A5QQ-01A	13.71	M0	1	Dead	10.58	1
TCGA-B6-A0RE-01A	TCGA-B6-A0RE-01A	13.72	M0	1	Alive	255.49	0
TCGA-E9-A54X-01A	TCGA-E9-A54X-01A	13.73	M0	1	Alive	23.88	0
TCGA-AC-A6IW-01A	TCGA-AC-A6IW-01A	13.54	MX	3	Alive	13.57	0
TCGA-OL-A97C-01A	TCGA-OL-A97C-01A	13.73	M0	1	Alive	8.9	0
TCGA-E2-A15O-01A	TCGA-E2-A15O-01A	13.74	M0	1	Alive	50.76	0
TCGA-BH-A0W7-01A	TCGA-BH-A0W7-01A	13.77	M0	1	Alive	44.78	0
TCGA-E2-A154-01A	TCGA-E2-A154-01A	13.78	M0	1	Alive	19.42	0
TCGA-A2-A0EQ-01A	TCGA-A2-A0EQ-01A	13.79	M0	1	Alive	79.7	0
TCGA-BH-A1EY-01A	TCGA-BH-A1EY-01A	13.93	M0	1	Dead	17.67	1
TCGA-E9-A22G-01A	TCGA-E9-A22G-01A	13.93	M0	1	Alive	40.7	0
TCGA-E2-A158-01A	TCGA-E2-A158-01A	13.95	M0	1	Alive	14.78	0
TCGA-AO-A03N-01B	TCGA-AO-A03N-01B	14	M0	1	Alive	66.72	0
TCGA-A7-A26I-01B	TCGA-A7-A26I-01B	14.01	M0	1	Alive	21.71	0
TCGA-AO-A0JC-01A	TCGA-AO-A0JC-01A	14.08	M0	1	Alive	50.82	0
TCGA-C8-A12K-01A	TCGA-C8-A12K-01A	14.26	M0	1	Alive	0	0
TCGA-C8-A138-01A	TCGA-C8-A138-01A	14.26	M0	1	Alive	12.48	0
TCGA-B6-A0RO-01A	TCGA-B6-A0RO-01A	14.29	M0	1	Alive	161.93	0
TCGA-S3-A6ZF-01A	TCGA-S3-A6ZF-01A	14.37	M0	1	Alive	18.79	0
TCGA-AO-A128-01A	TCGA-AO-A128-01A	14.48	M0	1	Alive	106.7	0
TCGA-D8-A27L-01A	TCGA-D8-A27L-01A	14.64	M0	1	Alive	16.39	0
TCGA-BH-A18T-01A	TCGA-BH-A18T-01A	14.73	M0	1	Dead	7.36	1
TCGA-A7-A13G-01B	TCGA-A7-A13G-01B	13.95	MX	3	Alive	23.59	0
TCGA-D8-A1JM-01A	TCGA-D8-A1JM-01A	14.8	M0	1	Alive	19.38	0
TCGA-E2-A1B6-01A	TCGA-E2-A1B6-01A	14.83	M0	1	Alive	28.48	0
TCGA-AR-A1AI-01A	TCGA-AR-A1AI-01A	14.93	M0	1	Alive	108.28	0
TCGA-A1-A0SP-01A	TCGA-A1-A0SP-01A	15.03	M0	1	Alive	19.19	0
TCGA-B6-A408-01A	TCGA-B6-A408-01A	15.05	M0	1	Alive	68.07	0
TCGA-B6-A0I2-01A	TCGA-B6-A0I2-01A	15.1	M0	1	Alive	143.27	0
TCGA-A2-A3XW-01A	TCGA-A2-A3XW-01A	15.2	M0	1	Alive	56.24	0
TCGA-C8-A133-01A	TCGA-C8-A133-01A	15.22	M0	1	Alive	0	0
TCGA-OL-A66H-01A	TCGA-OL-A66H-01A	8.459	MX	3	Alive		0
TCGA-BH-A2L8-01A	TCGA-BH-A2L8-01A	15.24	M0	1	Alive	20.11	0
TCGA-BH-A0B9-01A	TCGA-BH-A0B9-01A	15.4	M0	1	Alive	51.64	0
TCGA-A2-A0YM-01A	TCGA-A2-A0YM-01A	15.48	M0	1	Alive	31.7	0
TCGA-AR-A0U4-01A	TCGA-AR-A0U4-01A	15.76	M0	1	Alive	107.13	0
TCGA-E2-A1II-01A	TCGA-E2-A1II-01A	16.83	M0	1	Alive	33.67	0
TCGA-A2-A0SW-01A	TCGA-A2-A0SW-01A	9.499	M1	2	Dead	44.84	1
TCGA-A8-A07W-01A	TCGA-A8-A07W-01A	9.784	M1	2	Alive	9.99	0
TCGA-BH-A1FH-01A	TCGA-BH-A1FH-01A	10.15	M1	2	Dead	33.97	1
TCGA-UU-A93S-01A	TCGA-UU-A93S-01A	10.78	M1	2	Dead	3.81	1
TCGA-LL-A73Z-01A	TCGA-LL-A73Z-01A	11.06	M1	2	Dead	7.46	1
TCGA-A8-A08T-01A	TCGA-A8-A08T-01A	11.91	M1	2	Dead	111.99	1
TCGA-A2-A0CS-01A	TCGA-A2-A0CS-01A	12.3	M1	2	Dead	77.14	1
TCGA-A2-A0SV-01A	TCGA-A2-A0SV-01A	12.69	M1	2	Dead	27.1	1
TCGA-B6-A3ZX-01A	TCGA-B6-A3ZX-01A	12.69	M1	2	Dead	37.84	1
TCGA-5L-AAT1-01A	TCGA-5L-AAT1-01A	13.57	M1	2	Alive	48.32	0
TCGA-OL-A5D7-01A	TCGA-OL-A5D7-01A	15.73	MX	3	Alive	58.48	0
TCGA-B6-A0X1-01A	TCGA-B6-A0X1-01A	14.7	M1	2	Dead	244.91	1
TCGA-OL-A66I-01A	TCGA-OL-A66I-01A	15.97	MX	3	Alive	23.46	0
TCGA-AN-A0FJ-01A	TCGA-AN-A0FJ-01A	15.32	M1	2	Alive	7.95	0
TCGA-BH-A0B2-01A	TCGA-BH-A0B2-01A	12.8
Total 1283; out of which
179 samples are
duplicated;
Out of this duplication
6 samples - triplicated
173 samples -duplicated
6 x 2 =12
173 x 1 = 173
Total 185
1283-185=1098 (TCGA)
Duplicates Removed
Xena Star Values
Cbioportal-rest

## Sheet: Meta-OS-04-12-19-Low-50% 
sample	sample	Star (fkpm+uq+1)	American Joint Committee on Cancer Metastasis Stage Code	M0=1; M1=2; MX=3	Patient's Vital Status	Overall Survival (Months)	Alive=0; Dead=1
TCGA-BH-A0AZ-01A	TCGA-BH-A0AZ-01A	9.66	cM0 (i+)	1	Alive	63.04	0
TCGA-A2-A04R-01A	TCGA-A2-A04R-01A	0	M0	1	Alive	121.85	0
TCGA-A2-A0YJ-01A	TCGA-A2-A0YJ-01A	0	M0	1	Alive	18.59	0
TCGA-A8-A06R-01A	TCGA-A8-A06R-01A	0	M0	1	Alive	17.97	0
TCGA-A8-A07B-01A	TCGA-A8-A07B-01A	0	M0	1	Alive	42.97	0
TCGA-AN-A03X-01A	TCGA-AN-A03X-01A	0	M0	1	Alive	0.33	0
TCGA-AO-A03P-01A	TCGA-AO-A03P-01A	0	M0	1	Dead	95.63	1
TCGA-AO-A126-01A	TCGA-AO-A126-01A	0	M0	1	Alive	108.64	0
TCGA-BH-A0HL-01A	TCGA-BH-A0HL-01A	0	M0	1	Alive	2.37	0
TCGA-BH-A18G-01A	TCGA-BH-A18G-01A	0	M0	1	Alive	4.89	0
TCGA-C8-A12M-01A	TCGA-C8-A12M-01A	0	M0	1	Alive	11.76	0
TCGA-C8-A12P-01A	TCGA-C8-A12P-01A	0	M0	1	Alive	11.76	0
TCGA-C8-A135-01A	TCGA-C8-A135-01A	0	M0	1	Alive	12.91	0
TCGA-C8-A137-01A	TCGA-C8-A137-01A	0	M0	1	Alive	12.45	0
TCGA-D8-A1XR-01A	TCGA-D8-A1XR-01A	0	M0	1	Alive	15.83	0
TCGA-E9-A226-01A	TCGA-E9-A226-01A	0	M0	1	Dead	34.43	1
TCGA-LL-A5YM-01A	TCGA-LL-A5YM-01A	0	M0	1	Alive	15.31	0
TCGA-A8-A09T-01A	TCGA-A8-A09T-01A	0	MX	3	Alive	19.02	0
TCGA-AQ-A0Y5-01A	TCGA-AQ-A0Y5-01A	0	MX	3	Dead	5.65	1
TCGA-AQ-A1H2-01A	TCGA-AQ-A1H2-01A	6.191	MX	3	Alive	15.6	0
TCGA-AR-A24S-01A	TCGA-AR-A24S-01A	6.35	M0	1	Alive	97.77	0
TCGA-AC-A23H-01A	TCGA-AC-A23H-01A	6.378	M0	1	Dead	5.72	1
TCGA-AN-A0G0-01A	TCGA-AN-A0G0-01A	6.4	M0	1	Alive	0.53	0
TCGA-E2-A15A-01A	TCGA-E2-A15A-01A	6.452	M0	1	Alive	23.32	0
TCGA-BH-A0HU-01A	TCGA-BH-A0HU-01A	6.555	M0	1	Alive	12.88	0
TCGA-A2-A0T0-01A	TCGA-A2-A0T0-01A	6.558	M0	1	Alive	17.51	0
TCGA-BH-A18U-01A	TCGA-BH-A18U-01A	6.623	M0	1	Dead	51.35	1
TCGA-E2-A152-01A	TCGA-E2-A152-01A	6.811	M0	1	Alive	69.91	0
TCGA-A2-A1FZ-01A	TCGA-A2-A1FZ-01A	6.812	M0	1	Alive	22.44	0
TCGA-AO-A12G-01A	TCGA-AO-A12G-01A	6.854	M0	1	Alive	53.84	0
TCGA-E9-A5UO-01A	TCGA-E9-A5UO-01A	6.883	M0	1	Alive	25.79	0
TCGA-A8-A06Y-01A	TCGA-A8-A06Y-01A	6.892	M0	1	Alive	25.99	0
TCGA-A7-A0CH-01A	TCGA-A7-A0CH-01A	6.915	M0	1	Alive	35.45	0
TCGA-E9-A1N9-01A	TCGA-E9-A1N9-01A	6.96	M0	1	Alive	36.17	0
TCGA-AO-A12B-01A	TCGA-AO-A12B-01A	6.966	M0	1	Alive	98.19	0
TCGA-A8-A0AD-01A	TCGA-A8-A0AD-01A	6.971	M0	1	Alive	38.01	0
TCGA-D8-A1X5-01A	TCGA-D8-A1X5-01A	6.968	MX	3	Alive	18.56	0
TCGA-A8-A09W-01A	TCGA-A8-A09W-01A	6.976	M0	1	Alive	0.99	0
TCGA-D8-A1XC-01A	TCGA-D8-A1XC-01A	7.004	M0	1	Dead	12.39	1
TCGA-C8-A12T-01A	TCGA-C8-A12T-01A	7.01	M0	1	Alive	0	0
TCGA-E2-A1LB-01A	TCGA-E2-A1LB-01A	7.025	M0	1	Alive	75.76	0
TCGA-AR-A1AS-01A	TCGA-AR-A1AS-01A	7.05	M0	1	Alive	37.78	0
TCGA-AR-A2LE-01A	TCGA-AR-A2LE-01A	7.068	M0	1	Alive	166.29	0
TCGA-D8-A1JK-01A	TCGA-D8-A1JK-01A	7.075	M0	1	Alive	20.11	0
TCGA-B6-A1KF-01A	TCGA-B6-A1KF-01A	7.097	M0	1	Alive	101.45	0
TCGA-D8-A27W-01A	TCGA-D8-A27W-01A	7.099	M0	1	Alive	12.25	0
TCGA-AR-A24M-01A	TCGA-AR-A24M-01A	7.139	M0	1	Alive	120.24	0
TCGA-D8-A1XW-01A	TCGA-D8-A1XW-01A	7.335	M0	1	Alive	43	0
TCGA-D8-A1JE-01A	TCGA-D8-A1JE-01A	7.337	M0	1	Alive	18.89	0
TCGA-A8-A099-01A	TCGA-A8-A099-01A	7.331	MX	3	Alive	9.99	0
TCGA-A7-A4SF-01A	TCGA-A7-A4SF-01A	7.341	M0	1	Alive	17.9	0
TCGA-BH-A0E7-01A	TCGA-BH-A0E7-01A	7.341	M0	1	Alive	44.78	0
TCGA-A8-A092-01A	TCGA-A8-A092-01A	7.342	M0	1	Alive	30.95	0
TCGA-E9-A1NG-01A	TCGA-E9-A1NG-01A	7.391	M0	1	Dead	25.82	1
TCGA-AO-A0JL-01A	TCGA-AO-A0JL-01A	7.412	M0	1	Alive	55.29	0
TCGA-AR-A24T-01A	TCGA-AR-A24T-01A	7.456	M0	1	Alive	105.19	0
TCGA-B6-A0X0-01A	TCGA-B6-A0X0-01A	7.479	M0	1	Dead	129.6	1
TCGA-A2-A0YE-01A	TCGA-A2-A0YE-01A	7.487	M0	1	Alive	18.2	0
TCGA-E2-A14V-01A	TCGA-E2-A14V-01A	7.525	M0	1	Alive	34.23	0
TCGA-E9-A1RF-01A	TCGA-E9-A1RF-01A	7.553	M0	1	Alive	6.57	0
TCGA-A1-A0SN-01A	TCGA-A1-A0SN-01A	7.504	MX	3	Alive	39.29	0
TCGA-BH-A18V-01A	TCGA-BH-A18V-01A	7.56	M0	1	Dead	51.12	1
TCGA-A2-A25B-01A	TCGA-A2-A25B-01A	7.571	M0	1	Alive	42.41	0
TCGA-BH-A18N-01A	TCGA-BH-A18N-01A	7.588	M0	1	Dead	37.71	1
TCGA-A2-A3KC-01A	TCGA-A2-A3KC-01A	7.598	M0	1	Alive	36.2	0
TCGA-AN-A04A-01A	TCGA-AN-A04A-01A	7.629	M0	1	Alive	2.96	0
TCGA-AN-A04C-01A	TCGA-AN-A04C-01A	7.632	M0	1	Alive	1.77	0
TCGA-AN-A0AR-01A	TCGA-AN-A0AR-01A	7.632	M0	1	Alive	0.33	0
TCGA-D8-A1JD-01A	TCGA-D8-A1JD-01A	7.661	M0	1	Alive	18.13	0
TCGA-A8-A08A-01A	TCGA-A8-A08A-01A	7.664	M0	1	Alive	0.99	0
TCGA-AR-A0TV-01A	TCGA-AR-A0TV-01A	7.664	M0	1	Alive	75.16	0
TCGA-E9-A22E-01A	TCGA-E9-A22E-01A	7.681	M0	1	Alive	41.69	0
TCGA-AN-A0FK-01A	TCGA-AN-A0FK-01A	7.733	M0	1	Alive	7	0
TCGA-A2-A0CK-01A	TCGA-A2-A0CK-01A	7.773	M0	1	Alive	136.63	0
TCGA-A7-A3J0-01A	TCGA-A7-A3J0-01A	7.775	M0	1	Alive	10.28	0
TCGA-A8-A09E-01A	TCGA-A8-A09E-01A	7.785	M0	1	Alive	49.01	0
TCGA-BH-A0BV-01A	TCGA-BH-A0BV-01A	7.787	M0	1	Alive	49.9	0
TCGA-E2-A15G-01A	TCGA-E2-A15G-01A	7.817	M0	1	Alive	18.2	0
TCGA-AR-A254-01A	TCGA-AR-A254-01A	7.856	M0	1	Alive	85.58	0
TCGA-A2-A0ET-01A	TCGA-A2-A0ET-01A	7.871	M0	1	Alive	35.02	0
TCGA-D8-A1X6-01A	TCGA-D8-A1X6-01A	7.814	MX	3	Alive	17.77	0
TCGA-A8-A0A9-01A	TCGA-A8-A0A9-01A	7.896	M0	1	Alive	27	0
TCGA-A1-A0SQ-01A	TCGA-A1-A0SQ-01A	7.824	MX	3	Alive	18.2	0
TCGA-BH-A0HO-01A	TCGA-BH-A0HO-01A	7.91	M0	1	Alive	2.5	0
TCGA-E2-A155-01A	TCGA-E2-A155-01A	7.914	M0	1	Alive	21.02	0
TCGA-B6-A0RP-01A	TCGA-B6-A0RP-01A	7.918	M0	1	Dead	102.69	1
TCGA-C8-A12Y-01A	TCGA-C8-A12Y-01A	7.923	M0	1	Alive	48.49	0
TCGA-AR-A24Q-01A	TCGA-AR-A24Q-01A	7.924	M0	1	Alive	104.2	0
TCGA-BH-A1F2-01A	TCGA-BH-A1F2-01A	7.929	M0	1	Dead	31.5	1
TCGA-D8-A1XQ-01A	TCGA-D8-A1XQ-01A	7.929	M0	1	Alive	16.39	0
TCGA-A2-A0D0-01A	TCGA-A2-A0D0-01A	7.938	M0	1	Alive	67.28	0
TCGA-D8-A1JJ-01A	TCGA-D8-A1JJ-01A	7.948	M0	1	Alive	20.07	0
TCGA-A2-A4S1-01A	TCGA-A2-A4S1-01A	7.962	M0	1	Alive	26.94	0
TCGA-BH-A18L-01A	TCGA-BH-A18L-01A	7.985	M0	1	Dead	26.64	1
TCGA-E2-A10E-01A	TCGA-E2-A10E-01A	7.987	M0	1	Alive	28.42	0
TCGA-EW-A1OX-01A	TCGA-EW-A1OX-01A	7.955	MX	3	Alive	29.93	0
TCGA-D8-A27G-01A	TCGA-D8-A27G-01A	7.992	M0	1	Alive	13.44	0
TCGA-A8-A07J-01A	TCGA-A8-A07J-01A	8.025	M0	1	Alive	11.99	0
TCGA-BH-A1FN-01A	TCGA-BH-A1FN-01A	8.044	M0	1	Dead	72.01	1
TCGA-E2-A15L-01A	TCGA-E2-A15L-01A	8.047	M0	1	Alive	20.57	0
TCGA-E9-A1R5-01A	TCGA-E9-A1R5-01A	8.052	M0	1	Alive	3.02	0
TCGA-BH-A5J0-01A	TCGA-BH-A5J0-01A	8.059	M0	1	Alive	23.49	0
TCGA-AN-A041-01A	TCGA-AN-A041-01A	8.099	M0	1	Alive	0.23	0
TCGA-C8-A131-01A	TCGA-C8-A131-01A	8.11	M0	1	Alive	13.5	0
TCGA-C8-A12Z-01A	TCGA-C8-A12Z-01A	8.112	M0	1	Alive	12.55	0
TCGA-BH-A0C1-01B	TCGA-BH-A0C1-01B	8.117	M0	1	Dead	46.35	1
TCGA-BH-A18S-01A	TCGA-BH-A18S-01A	8.121	M0	1	Dead	66	1
TCGA-A8-A06Z-01A	TCGA-A8-A06Z-01A	8.13	M0	1	Alive	1.02	0
TCGA-AR-A24X-01A	TCGA-AR-A24X-01A	8.132	M0	1	Alive	98.69	0
TCGA-AN-A0XU-01A	TCGA-AN-A0XU-01A	8.134	M0	1	Alive	0.33	0
TCGA-A2-A3XV-01A	TCGA-A2-A3XV-01A	8.135	M0	1	Alive	32.72	0
TCGA-AN-A0XP-01A	TCGA-AN-A0XP-01A	8.141	M0	1	Alive	0.3	0
TCGA-AC-A3YJ-01A	TCGA-AC-A3YJ-01A	8.131	MX	3	Alive	24.77	0
TCGA-A8-A07S-01A	TCGA-A8-A07S-01A	8.155	M0	1	Alive	7.98	0
TCGA-BH-A0WA-01A	TCGA-BH-A0WA-01A	8.157	M0	1	Alive	23.03	0
TCGA-BH-A6R8-01A	TCGA-BH-A6R8-01A	8.172	M0	1	Alive	9.63	0
TCGA-A8-A079-01A	TCGA-A8-A079-01A	8.179	M0	1	Alive	9	0
TCGA-AR-A2LL-01A	TCGA-AR-A2LL-01A	8.189	M0	1	Alive	66.1	0
TCGA-GM-A2DA-01A	TCGA-GM-A2DA-01A	8.19	M0	1	Dead	216.59	1
TCGA-A8-A07P-01A	TCGA-A8-A07P-01A	8.196	M0	1	Alive	10.97	0
TCGA-A8-A096-01A	TCGA-A8-A096-01A	8.209	M0	1	Alive	0	0
TCGA-A2-A4S0-01A	TCGA-A2-A4S0-01A	8.231	M0	1	Alive	23.19	0
TCGA-C8-A274-01A	TCGA-C8-A274-01A	8.231	M0	1	Alive	16.69	0
TCGA-BH-A0H0-01A	TCGA-BH-A0H0-01A	8.241	M0	1	Alive	15.14	0
TCGA-D8-A1JN-01A	TCGA-D8-A1JN-01A	8.202	MX	3	Alive	20.37	0
TCGA-AC-A8OR-01A	TCGA-AC-A8OR-01A	8.204	MX	3	Alive	1.31	0
TCGA-B6-A0IP-01A	TCGA-B6-A0IP-01A	8.243	M0	1	Dead	128.98	1
TCGA-Z7-A8R6-01A	TCGA-Z7-A8R6-01A	8.243	M0	1	Alive	106.96	0
TCGA-AR-A0TP-01A	TCGA-AR-A0TP-01A	8.259	M0	1	Alive	140.44	0
TCGA-LL-A442-01A	TCGA-LL-A442-01A	8.236	MX	3	Alive	29.2	0
TCGA-A8-A09R-01A	TCGA-A8-A09R-01A	8.295	M0	1	Alive	8.97	0
TCGA-AO-A125-01A	TCGA-AO-A125-01A	8.302	M0	1	Alive	113.53	0
TCGA-BH-A1EX-01A	TCGA-BH-A1EX-01A	8.305	M0	1	Dead	49.54	1
TCGA-E2-A15K-01A	TCGA-E2-A15K-01A	8.316	M0	1	Alive	9.03	0
TCGA-A8-A085-01A	TCGA-A8-A085-01A	8.34	M0	1	Alive	36.93	0
TCGA-AR-A24K-01A	TCGA-AR-A24K-01A	8.341	M0	1	Alive	50.85	0
TCGA-AR-A1AV-01A	TCGA-AR-A1AV-01A	8.342	M0	1	Alive	61.24	0
TCGA-B6-A402-01A	TCGA-B6-A402-01A	8.345	M0	1	Alive	74.93	0
TCGA-D8-A140-01A	TCGA-D8-A140-01A	8.346	M0	1	Alive	13.24	0
TCGA-BH-A0DH-01A	TCGA-BH-A0DH-01A	8.358	M0	1	Alive	37.98	0
TCGA-E9-A24A-01A	TCGA-E9-A24A-01A	8.363	M0	1	Alive	24.54	0
TCGA-C8-A12L-01A	TCGA-C8-A12L-01A	8.371	M0	1	Alive	11.93	0
TCGA-D8-A1JU-01A	TCGA-D8-A1JU-01A	8.403	M0	1	Alive	14.68	0
TCGA-A8-A07R-01A	TCGA-A8-A07R-01A	8.411	M0	1	Alive	8.97	0
TCGA-AO-A03U-01B	TCGA-AO-A03U-01B	8.436	M0	1	Dead	58.9	1
TCGA-A2-A25C-01A	TCGA-A2-A25C-01A	8.451	M0	1	Alive	17.18	0
TCGA-E2-A1LE-01A	TCGA-E2-A1LE-01A	8.452	M0	1	Dead	28.88	1
TCGA-OL-A66K-01A	TCGA-OL-A66K-01A	8.387	MX	3	Dead	41.89	1
TCGA-AQ-A04H-01B	TCGA-AQ-A04H-01B	8.39	MX	3	Alive	24.77	0
TCGA-A1-A0SM-01A	TCGA-A1-A0SM-01A	8.455	M0	1	Alive	7.95	0
TCGA-C8-A1HI-01A	TCGA-C8-A1HI-01A	8.46	M0	1	Alive	11.27	0
TCGA-B6-A0RS-01A	TCGA-B6-A0RS-01A	8.463	M0	1	Dead	100.62	1
TCGA-D8-A1XJ-01A	TCGA-D8-A1XJ-01A	8.447	MX	3	Alive	21.81	0
TCGA-A2-A1FX-01A	TCGA-A2-A1FX-01A	8.469	M0	1	Alive	60.68	0
TCGA-A7-A26G-01A	TCGA-A7-A26G-01A	8.492	M0	1	Alive	23.72	0
TCGA-AC-A5EH-01A	TCGA-AC-A5EH-01A	8.452	MX	3	Alive	16.79	0
TCGA-4H-AAAK-01A	TCGA-4H-AAAK-01A	8.495	M0	1	Alive	11.43	0
TCGA-E9-A1RH-01A	TCGA-E9-A1RH-01A	8.502	M0	1	Alive	46.55	0
TCGA-AO-A12H-01A	TCGA-AO-A12H-01A	8.51	M0	1	Alive	40.54	0
TCGA-AO-A03L-01A	TCGA-AO-A03L-01A	8.531	M0	1	Alive	80.22	0
TCGA-A8-A07F-01A	TCGA-A8-A07F-01A	8.535	M0	1	Alive	18.96	0
TCGA-BH-A1FJ-01A	TCGA-BH-A1FJ-01A	8.539	M0	1	Dead	63.3	1
TCGA-D8-A13Y-01A	TCGA-D8-A13Y-01A	8.547	M0	1	Alive	56.77	0
TCGA-A8-A09B-01A	TCGA-A8-A09B-01A	8.553	M0	1	Alive	11.99	0
TCGA-D8-A1XO-01A	TCGA-D8-A1XO-01A	8.565	M0	1	Alive	55.26	0
TCGA-AR-A1AH-01A	TCGA-AR-A1AH-01A	8.566	M0	1	Alive	125.07	0
TCGA-D8-A1JA-01A	TCGA-D8-A1JA-01A	8.581	M0	1	Alive	16.49	0
TCGA-AN-A0AS-01A	TCGA-AN-A0AS-01A	8.587	M0	1	Alive	0.33	0
TCGA-A2-A3XX-01A	TCGA-A2-A3XX-01A	8.593	M0	1	Dead	47.27	1
TCGA-BH-A18K-01A	TCGA-BH-A18K-01A	8.597	M0	1	Dead	90.77	1
TCGA-A1-A0SO-01A	TCGA-A1-A0SO-01A	8.607	M0	1	Alive	27.99	0
TCGA-AR-A1AN-01A	TCGA-AR-A1AN-01A	8.612	M0	1	Alive	95.93	0
TCGA-AR-A0TW-01A	TCGA-AR-A0TW-01A	8.624	M0	1	Alive	98.85	0
TCGA-D8-A27E-01A	TCGA-D8-A27E-01A	8.664	M0	1	Alive	17.41	0
TCGA-BH-A18R-01A	TCGA-BH-A18R-01A	8.667	M0	1	Dead	37.52	1
TCGA-BH-A0BJ-01A	TCGA-BH-A0BJ-01A	8.668	M0	1	Alive	21.68	0
TCGA-GM-A2DL-01A	TCGA-GM-A2DL-01A	8.673	M0	1	Alive	115.6	0
TCGA-AN-A0FS-01A	TCGA-AN-A0FS-01A	8.684	M0	1	Alive	6.9	0
TCGA-B6-A0RM-01A	TCGA-B6-A0RM-01A	8.616	MX	3	Dead	77.96	1
TCGA-EW-A1OW-01A	TCGA-EW-A1OW-01A	8.621	MX	3	Alive	22.8	0
TCGA-A2-A04Y-01A	TCGA-A2-A04Y-01A	8.716	M0	1	Alive	36.1	0
TCGA-E2-A156-01A	TCGA-E2-A156-01A	8.718	M0	1	Alive	23.85	0
TCGA-E9-A1R4-01A	TCGA-E9-A1R4-01A	8.723	M0	1	Alive	6.11	0
TCGA-AN-A0XW-01A	TCGA-AN-A0XW-01A	8.73	M0	1	Alive	5.58	0
TCGA-EW-A1P5-01A	TCGA-EW-A1P5-01A	8.736	M0	1	Alive	23.09	0
TCGA-BH-A0BZ-01A	TCGA-BH-A0BZ-01A	8.741	M0	1	Alive	74.08	0
TCGA-LL-A6FP-01A	TCGA-LL-A6FP-01A	8.679	MX	3	Alive	22.24	0
TCGA-AN-A0FY-01A	TCGA-AN-A0FY-01A	8.758	M0	1	Alive	0.33	0
TCGA-E9-A3Q9-01A	TCGA-E9-A3Q9-01A	8.759	M0	1	Alive	32.88	0
TCGA-A7-A56D-01A	TCGA-A7-A56D-01A	8.763	M0	1	Alive	14.72	0
TCGA-EW-A2FW-01A	TCGA-EW-A2FW-01A	8.719	MX	3	Alive	22.08	0
TCGA-A8-A06X-01A	TCGA-A8-A06X-01A	8.771	M0	1	Dead	30.98	1
TCGA-A2-A0YL-01A	TCGA-A2-A0YL-01A	8.789	M0	1	Alive	48.42	0
TCGA-EW-A1OY-01A	TCGA-EW-A1OY-01A	8.735	MX	3	Alive	29.83	0
TCGA-E2-A2P6-01A	TCGA-E2-A2P6-01A	8.792	M0	1	Alive	34.53	0
TCGA-E2-A1L8-01A	TCGA-E2-A1L8-01A	8.801	M0	1	Alive	73.59	0
TCGA-C8-A1HL-01A	TCGA-C8-A1HL-01A	8.805	M0	1	Alive	10.41	0
TCGA-D8-A1XV-01A	TCGA-D8-A1XV-01A	8.814	M0	1	Alive	15.14	0
TCGA-EW-A6SC-01A	TCGA-EW-A6SC-01A	8.826	M0	1	Alive	31.27	0
TCGA-A1-A0SD-01A	TCGA-A1-A0SD-01A	8.833	M0	1	Alive	14.36	0
TCGA-D8-A3Z6-01A	TCGA-D8-A3Z6-01A	8.839	M0	1	Alive	18.5	0
TCGA-B6-A0I1-01A	TCGA-B6-A0I1-01A	8.84	M0	1	Dead	77.56	1
TCGA-A8-A08P-01A	TCGA-A8-A08P-01A	8.844	M0	1	Alive	30.98	0
TCGA-B6-A0IA-01A	TCGA-B6-A0IA-01A	8.861	M0	1	Alive	275.66	0
TCGA-AR-A0TR-01A	TCGA-AR-A0TR-01A	8.862	M0	1	Dead	5.26	1
TCGA-E9-A1R3-01A	TCGA-E9-A1R3-01A	8.866	M0	1	Alive	2.56	0
TCGA-BH-A1ET-01A	TCGA-BH-A1ET-01A	8.871	M0	1	Dead	82.79	1
TCGA-A2-A04W-01A	TCGA-A2-A04W-01A	8.881	M0	1	Alive	101.91	0
TCGA-EW-A1PG-01A	TCGA-EW-A1PG-01A	8.836	MX	3	Alive	34.53	0
TCGA-AN-A0XR-01A	TCGA-AN-A0XR-01A	8.889	M0	1	Alive	0.33	0
TCGA-A7-A6VY-01A	TCGA-A7-A6VY-01A	8.9	M0	1	Alive	8.74	0
TCGA-A7-A4SE-01A	TCGA-A7-A4SE-01A	8.902	M0	1	Alive	21.16	0
TCGA-B6-A0X4-01A	TCGA-B6-A0X4-01A	8.903	M0	1	Dead	28.25	1
TCGA-D8-A1XZ-01A	TCGA-D8-A1XZ-01A	8.854	MX	3	Alive	15.31	0
TCGA-B6-A0IE-01A	TCGA-B6-A0IE-01A	8.913	M0	1	Dead	65.47	1
TCGA-A2-A0EV-01A	TCGA-A2-A0EV-01A	8.916	M0	1	Alive	31.8	0
TCGA-BH-A0DD-01A	TCGA-BH-A0DD-01A	8.917	M0	1	Alive	81.67	0
TCGA-A7-A0CD-01A	TCGA-A7-A0CD-01A	8.919	M0	1	Alive	38.27	0
TCGA-D8-A1X7-01A	TCGA-D8-A1X7-01A	8.879	MX	3	Alive	16.72	0
TCGA-A2-A1FW-01A	TCGA-A2-A1FW-01A	8.923	M0	1	Alive	17.35	0
TCGA-A2-A3XU-01A	TCGA-A2-A3XU-01A	8.944	M0	1	Dead	29.96	1
TCGA-E2-A1LA-01A	TCGA-E2-A1LA-01A	8.945	M0	1	Alive	24.57	0
TCGA-E9-A1NF-01A	TCGA-E9-A1NF-01A	8.956	M0	1	Dead	35.22	1
TCGA-D8-A1JS-01A	TCGA-D8-A1JS-01A	8.958	M0	1	Alive	12.19	0
TCGA-E2-A15J-01A	TCGA-E2-A15J-01A	8.958	M0	1	Alive	53.88	0
TCGA-B6-A0I6-01A	TCGA-B6-A0I6-01A	8.967	M0	1	Dead	32.56	1
TCGA-BH-A18M-01A	TCGA-BH-A18M-01A	8.967	M0	1	Dead	72.5	1
TCGA-B6-A0RU-01A	TCGA-B6-A0RU-01A	8.974	M0	1	Alive	282.69	0
TCGA-D8-A1XT-01A	TCGA-D8-A1XT-01A	8.981	M0	1	Alive	16.62	0
TCGA-D8-A73U-01A	TCGA-D8-A73U-01A	8.981	M0	1	Alive	16.16	0
TCGA-AR-A24V-01A	TCGA-AR-A24V-01A	8.982	M0	1	Alive	105.22	0
TCGA-A8-A075-01A	TCGA-A8-A075-01A	8.989	M0	1	Alive	17.02	0
TCGA-AR-A1AU-01A	TCGA-AR-A1AU-01A	8.993	M0	1	Alive	94.22	0
TCGA-AN-A03Y-01A	TCGA-AN-A03Y-01A	8.999	M0	1	Alive	0.33	0
TCGA-C8-A1HE-01A	TCGA-C8-A1HE-01A	8.999	M0	1	Alive	12.32	0
TCGA-E2-A1L9-01A	TCGA-E2-A1L9-01A	9	M0	1	Alive	19.65	0
TCGA-E2-A106-01A	TCGA-E2-A106-01A	9.002	M0	1	Alive	83.48	0
TCGA-A2-A0D4-01A	TCGA-A2-A0D4-01A	9.003	M0	1	Alive	25.2	0
TCGA-A1-A0SJ-01A	TCGA-A1-A0SJ-01A	9.006	M0	1	Alive	13.67	0
TCGA-E2-A1LG-01A	TCGA-E2-A1LG-01A	9.013	M0	1	Alive	50.03	0
TCGA-AO-A0JF-01A	TCGA-AO-A0JF-01A	9.034	M0	1	Alive	65.05	0
TCGA-B6-A40C-01A	TCGA-B6-A40C-01A	9.035	M0	1	Alive	71.09	0
TCGA-B6-A0I8-01A	TCGA-B6-A0I8-01A	9.038	M0	1	Dead	24.61	1
TCGA-BH-A0B8-01A	TCGA-BH-A0B8-01A	9.039	M0	1	Alive	51.54	0
TCGA-BH-A0BM-01A	TCGA-BH-A0BM-01A	9.039	M0	1	Alive	61.63	0
TCGA-BH-A0HP-01A	TCGA-BH-A0HP-01A	9.048	M0	1	Alive	13.6	0
TCGA-BH-A42T-01A	TCGA-BH-A42T-01A	9.052	M0	1	Dead	10.51	1
TCGA-AC-A2B8-01A	TCGA-AC-A2B8-01A	9.053	M0	1	Alive	22.24	0
TCGA-E9-A1RG-01A	TCGA-E9-A1RG-01A	9.059	M0	1	Alive	21.25	0
TCGA-A8-A09Q-01A	TCGA-A8-A09Q-01A	9.061	M0	1	Alive	25	0
TCGA-D8-A1X8-01A	TCGA-D8-A1X8-01A	9.062	M0	1	Alive	25.72	0
TCGA-B6-A0RI-01A	TCGA-B6-A0RI-01A	9.066	M0	1	Alive	234.1	0
TCGA-C8-A278-01A	TCGA-C8-A278-01A	9.066	M0	1	Alive	9.76	0
TCGA-A2-A0T4-01A	TCGA-A2-A0T4-01A	9.086	M0	1	Alive	20.5	0
TCGA-E2-A14W-01A	TCGA-E2-A14W-01A	9.086	M0	1	Alive	32	0
TCGA-E2-A15E-01A	TCGA-E2-A15E-01A	9.086	M0	1	Alive	20.7	0
TCGA-A1-A0SE-01A	TCGA-A1-A0SE-01A	9.095	M0	1	Alive	43.4	0
TCGA-BH-A0EB-01A	TCGA-BH-A0EB-01A	9.095	M0	1	Alive	24.47	0
TCGA-D8-A1XY-01A	TCGA-D8-A1XY-01A	9.06	MX	3	Alive	16.52	0
TCGA-A2-A0YC-01A	TCGA-A2-A0YC-01A	9.107	M0	1	Alive	32.52	0
TCGA-E9-A1RD-01A	TCGA-E9-A1RD-01A	9.109	M0	1	Alive	1.12	0
TCGA-AO-A12F-01A	TCGA-AO-A12F-01A	9.113	M0	1	Alive	60.51	0
TCGA-GM-A5PX-01A	TCGA-GM-A5PX-01A	9.116	M0	1	Alive	18.1	0
TCGA-D8-A1X9-01A	TCGA-D8-A1X9-01A	9.119	M0	1	Alive	23.88	0
TCGA-AN-A0FL-01A	TCGA-AN-A0FL-01A	9.12	M0	1	Alive	7.59	0
TCGA-C8-A8HQ-01A	TCGA-C8-A8HQ-01A	9.122	M0	1	Alive	12.48	0
TCGA-LQ-A4E4-01A	TCGA-LQ-A4E4-01A	9.089	MX	3	Alive	27.89	0
TCGA-A7-A0DA-01A	TCGA-A7-A0DA-01A	9.125	M0	1	Alive	35.64	0
TCGA-AR-A24Z-01A	TCGA-AR-A24Z-01A	9.141	M0	1	Alive	98.59	0
TCGA-D8-A1JG-01B	TCGA-D8-A1JG-01B	9.142	M0	1	Alive	52.96	0
TCGA-A2-A0CW-01A	TCGA-A2-A0CW-01A	9.143	M0	1	Alive	107.85	0
TCGA-C8-A1HK-01A	TCGA-C8-A1HK-01A	9.159	M0	1	Alive	12.02	0
TCGA-A8-A06Q-01A	TCGA-A8-A06Q-01A	9.177	M0	1	Alive	1.02	0
TCGA-D8-A27F-01A	TCGA-D8-A27F-01A	9.184	M0	1	Alive	16.03	0
TCGA-BH-A0HN-01A	TCGA-BH-A0HN-01A	9.186	M0	1	Alive	16.95	0
TCGA-C8-A27B-01A	TCGA-C8-A27B-01A	9.191	M0	1	Alive	14.42	0
TCGA-AO-A12C-01A	TCGA-AO-A12C-01A	9.192	M0	1	Alive	77.92	0
TCGA-D8-A1JT-01A	TCGA-D8-A1JT-01A	9.215	M0	1	Alive	13.3	0
TCGA-AR-A0U2-01A	TCGA-AR-A0U2-01A	9.219	M0	1	Dead	83.8	1
TCGA-E2-A1B4-01A	TCGA-E2-A1B4-01A	9.229	M0	1	Dead	32.98	1
TCGA-E9-A248-01A	TCGA-E9-A248-01A	9.23	M0	1	Alive	1.94	0
TCGA-E9-A1N4-01A	TCGA-E9-A1N4-01A	9.234	M0	1	Alive	32.85	0
TCGA-C8-A26V-01A	TCGA-C8-A26V-01A	9.259	M0	1	Alive	20.24	0
TCGA-B6-A0WV-01A	TCGA-B6-A0WV-01A	9.271	M0	1	Dead	79.4	1
TCGA-A1-A0SH-01A	TCGA-A1-A0SH-01A	9.275	M0	1	Alive	47.21	0
TCGA-A2-A0YD-01A	TCGA-A2-A0YD-01A	9.279	M0	1	Alive	25.26	0
TCGA-AC-A23E-01A	TCGA-AC-A23E-01A	9.2	MX	3	Alive	22.93	0
TCGA-PE-A5DE-01A	TCGA-PE-A5DE-01A	9.28	M0	1	Alive	86.89	0
TCGA-A2-A0EX-01A	TCGA-A2-A0EX-01A	9.285	M0	1	Alive	24.7	0
TCGA-B6-A1KI-01A	TCGA-B6-A1KI-01A	9.289	M0	1	Alive	73.46	0
TCGA-D8-A27T-01A	TCGA-D8-A27T-01A	9.295	M0	1	Alive	13.07	0
TCGA-LL-A8F5-01A	TCGA-LL-A8F5-01A	9.23	MX	3	Alive	19.58	0
TCGA-AO-A03O-01A	TCGA-AO-A03O-01A	9.306	M0	1	Dead	81.57	1
TCGA-EW-A1P3-01A	TCGA-EW-A1P3-01A	9.239	MX	3	Alive	52.92	0
TCGA-B6-A0IO-01A	TCGA-B6-A0IO-01A	9.307	M0	1	Alive	165.64	0
TCGA-A2-A25D-01A	TCGA-A2-A25D-01A	9.31	M0	1	Alive	18.13	0
TCGA-C8-A12U-01A	TCGA-C8-A12U-01A	9.314	M0	1	Alive	12.65	0
TCGA-AN-A0XS-01A	TCGA-AN-A0XS-01A	9.325	M0	1	Alive	0.33	0
TCGA-AO-A0JM-01A	TCGA-AO-A0JM-01A	9.329	M0	1	Alive	71.75	0
TCGA-BH-A0HY-01A	TCGA-BH-A0HY-01A	9.33	M0	1	Alive	50.76	0
TCGA-A8-A09N-01A	TCGA-A8-A09N-01A	9.334	M0	1	Alive	1.02	0
TCGA-E9-A244-01A	TCGA-E9-A244-01A	9.336	M0	1	Alive	0.69	0
TCGA-D8-A143-01A	TCGA-D8-A143-01A	9.338	M0	1	Alive	14.16	0
TCGA-C8-A26X-01A	TCGA-C8-A26X-01A	9.345	M0	1	Alive	12.35	0
TCGA-A8-A09Z-01A	TCGA-A8-A09Z-01A	9.348	M0	1	Alive	0	0
TCGA-D8-A1JF-01A	TCGA-D8-A1JF-01A	9.363	M0	1	Alive	12.02	0
TCGA-A8-A09D-01A	TCGA-A8-A09D-01A	9.365	M0	1	Alive	50	0
TCGA-D8-A142-01A	TCGA-D8-A142-01A	9.369	M0	1	Alive	13.96	0
TCGA-C8-A1HF-01A	TCGA-C8-A1HF-01A	9.372	M0	1	Alive	10.91	0
TCGA-A2-A3KD-01A	TCGA-A2-A3KD-01A	9.376	M0	1	Alive	39.62	0
TCGA-D8-A13Z-01A	TCGA-D8-A13Z-01A	9.376	M0	1	Alive	20.86	0
TCGA-AC-A5XS-01A	TCGA-AC-A5XS-01A	9.336	MX	3	Alive	19.32	0
TCGA-A8-A08C-01A	TCGA-A8-A08C-01A	9.377	M0	1	Alive	28.94	0
TCGA-EW-A423-01A	TCGA-EW-A423-01A	9.341	MX	3	Alive	17.51	0
TCGA-AR-A0U0-01A	TCGA-AR-A0U0-01A	9.38	M0	1	Alive	65.31	0
TCGA-BH-A0DQ-01A	TCGA-BH-A0DQ-01A	9.384	M0	1	Alive	3.22	0
TCGA-AO-A12E-01A	TCGA-AO-A12E-01A	9.388	M0	1	Alive	70.37	0
TCGA-D8-A1J8-01A	TCGA-D8-A1J8-01A	9.388	M0	1	Alive	14.16	0
TCGA-AQ-A54O-01A	TCGA-AQ-A54O-01A	9.396	M0	1	Alive	32.88	0
TCGA-EW-A1PE-01A	TCGA-EW-A1PE-01A	9.402	M0	1	Alive	10.51	0
TCGA-AR-A250-01A	TCGA-AR-A250-01A	9.409	M0	1	Alive	88.93	0
TCGA-E9-A1RI-01A	TCGA-E9-A1RI-01A	9.413	M0	1	Alive	47.6	0
TCGA-BH-A0E1-01A	TCGA-BH-A0E1-01A	9.416	M0	1	Alive	15.67	0
TCGA-AR-A24L-01A	TCGA-AR-A24L-01A	9.417	M0	1	Dead	94.15	1
TCGA-A2-A0CY-01A	TCGA-A2-A0CY-01A	9.423	M0	1	Alive	54.96	0
TCGA-E2-A573-01A	TCGA-E2-A573-01A	9.426	M0	1	Alive	34.89	0
TCGA-BH-A0C7-01B	TCGA-BH-A0C7-01B	9.43	M0	1	Alive	90.9	0
TCGA-B6-A0IC-01A	TCGA-B6-A0IC-01A	9.394	MX	3	Dead	50.66	1
TCGA-A7-A13D-01A	TCGA-A7-A13D-01A	9.432	M0	1	Alive	31.7	0
TCGA-A8-A08S-01A	TCGA-A8-A08S-01A	9.45	M0	1	Alive	32.98	0
TCGA-E9-A5UP-01A	TCGA-E9-A5UP-01A	9.465	M0	1	Alive	26.38	0
TCGA-A8-A094-01A	TCGA-A8-A094-01A	9.466	M0	1	Alive	0	0
TCGA-BH-A0HI-01A	TCGA-BH-A0HI-01A	9.467	M0	1	Alive	20.37	0
TCGA-E9-A247-01A	TCGA-E9-A247-01A	9.473	M0	1	Alive	38.96	0
TCGA-AN-A049-01A	TCGA-AN-A049-01A	9.483	M0	1	Alive	0.62	0
TCGA-A2-A0CT-01A	TCGA-A2-A0CT-01A	9.49	M0	1	Alive	75.2	0
TCGA-PL-A8LZ-01A	TCGA-PL-A8LZ-01A	9.49	M0	1	Alive	9.92	0
TCGA-AR-A0U1-01A	TCGA-AR-A0U1-01A		M0	1	Alive	133.11	0
TCGA-D8-A27N-01A	TCGA-D8-A27N-01A	9.497	M0	1	Alive	17.05	0
TCGA-AC-A6IX-01A	TCGA-AC-A6IX-01A	9.433	MX	3	Alive	12.25	0
TCGA-AR-A24O-01A	TCGA-AR-A24O-01A	9.505	M0	1	Alive	118.5	0
TCGA-A8-A07E-01A	TCGA-A8-A07E-01A	9.458	MX	3	Alive	19.97	0
TCGA-AN-A04D-01A	TCGA-AN-A04D-01A	9.507	M0	1	Alive	1.71	0
TCGA-AO-A0J2-01A	TCGA-AO-A0J2-01A	9.516	M0	1	Alive	32.75	0
TCGA-AO-A03V-01A	TCGA-AO-A03V-01A	9.517	M0	1	Alive	44.38	0
TCGA-D8-A27P-01A	TCGA-D8-A27P-01A	9.521	M0	1	Alive	1.61	0
TCGA-LL-A6FQ-01A	TCGA-LL-A6FQ-01A	9.475	MX	3	Alive	2.63	0
TCGA-E2-A1IN-01A	TCGA-E2-A1IN-01A	9.527	M0	1	Alive	22.17	0
TCGA-A2-A0SU-01A	TCGA-A2-A0SU-01A	9.532	M0	1	Alive	54.6	0
TCGA-AO-A0JG-01A	TCGA-AO-A0JG-01A	9.533	M0	1	Alive	26.22	0
TCGA-A8-A06N-01A	TCGA-A8-A06N-01A	9.534	M0	1	Alive	0	0
TCGA-A8-A09G-01A	TCGA-A8-A09G-01A	9.547	M0	1	Alive	0	0
TCGA-WT-AB44-01A	TCGA-WT-AB44-01A	9.503	MX	3	Alive	29.01	0
TCGA-A8-A07C-01A	TCGA-A8-A07C-01A	9.551	M0	1	Alive	33.97	0
TCGA-A7-A3RF-01A	TCGA-A7-A3RF-01A	9.555	M0	1	Alive	13.4	0
TCGA-BH-A0AV-01A	TCGA-BH-A0AV-01A	9.556	M0	1	Alive	59.79	0
TCGA-AN-A0AM-01A	TCGA-AN-A0AM-01A	9.557	M0	1	Alive	0.16	0
TCGA-B6-A0X7-01A	TCGA-B6-A0X7-01A	9.518	MX	3	Dead	58.51	1
TCGA-D8-A3Z5-01A	TCGA-D8-A3Z5-01A	9.56	M0	1	Alive	33.34	0
TCGA-OL-A66N-01A	TCGA-OL-A66N-01A	9.523	MX	3	Alive	26.02	0
TCGA-E2-A1IL-01A	TCGA-E2-A1IL-01A	9.564	M0	1	Alive	3.88	0
TCGA-BH-A1EN-01A	TCGA-BH-A1EN-01A	9.571	M0	1	Dead	69.88	1
TCGA-BH-A0H9-01A	TCGA-BH-A0H9-01A	9.577	M0	1	Alive	40.97	0
TCGA-A8-A06U-01A	TCGA-A8-A06U-01A	9.584	M0	1	Dead	29.01	1
TCGA-A2-A0YT-01A	TCGA-A2-A0YT-01A	9.585	M0	1	Dead	23.75	1
TCGA-E2-A1B0-01A	TCGA-E2-A1B0-01A	9.591	M0	1	Alive	53.58	0
TCGA-GM-A2DK-01A	TCGA-GM-A2DK-01A	9.592	M0	1	Alive	86.89	0
TCGA-GM-A2DM-01A	TCGA-GM-A2DM-01A	9.593	M0	1	Alive	105.98	0
TCGA-A7-A3IY-01A	TCGA-A7-A3IY-01A	9.594	M0	1	Alive	11.33	0
TCGA-AO-A0JA-01A	TCGA-AO-A0JA-01A	9.596	M0	1	Alive	21.52	0
TCGA-D8-A1JP-01A	TCGA-D8-A1JP-01A	9.604	M0	1	Alive	20.99	0
TCGA-A7-A4SB-01A	TCGA-A7-A4SB-01A	9.606	M0	1	Alive	13.73	0
TCGA-D8-A1XS-01A	TCGA-D8-A1XS-01A	9.606	M0	1	Alive	16.29	0
TCGA-AO-A1KR-01A	TCGA-AO-A1KR-01A	9.611	M0	1	Alive	82.56	0
TCGA-E9-A22B-01A	TCGA-E9-A22B-01A	9.628	M0	1	Alive	38.34	0
TCGA-AN-A0AL-01A	TCGA-AN-A0AL-01A	9.633	M0	1	Alive	7.46	0
TCGA-AN-A0FD-01A	TCGA-AN-A0FD-01A	9.636	M0	1	Alive	6.44	0
TCGA-AN-A0FF-01A	TCGA-AN-A0FF-01A	9.636	M0	1	Alive	5.65	0
TCGA-A2-A0EM-01A	TCGA-A2-A0EM-01A	9.645	M0	1	Alive	101.64	0
TCGA-BH-A0AW-01A	TCGA-BH-A0AW-01A	9.645	M0	1	Alive	20.43	0
TCGA-AC-A5XU-01A	TCGA-AC-A5XU-01A	9.597	MX	3	Alive	14.95	0
TCGA-LL-A50Y-01A	TCGA-LL-A50Y-01A	9.6	MX	3	Alive	25.03	0
TCGA-BH-A1FL-01A	TCGA-BH-A1FL-01A	9.65	M0	1	Dead	54.96	1
TCGA-C8-A275-01A	TCGA-C8-A275-01A	9.668	M0	1	Alive	0.03	0
TCGA-C8-A12Q-01A	TCGA-C8-A12Q-01A	9.683	M0	1	Dead	12.65	1
TCGA-E9-A1ND-01A	TCGA-E9-A1ND-01A	9.685	M0	1	Alive	41.59	0
TCGA-AC-A3HN-01A	TCGA-AC-A3HN-01A	9.614	MX	3	Alive	16.29	0
TCGA-PE-A5DD-01A	TCGA-PE-A5DD-01A	9.685	M0	1	Alive	64.16	0
TCGA-D8-A27H-01A	TCGA-D8-A27H-01A	9.689	M0	1	Alive	13.04	0
TCGA-EW-A1PD-01A	TCGA-EW-A1PD-01A	9.692	M0	1	Alive	13.93	0
TCGA-BH-A1FM-01A	TCGA-BH-A1FM-01A	9.698	M0	1	Dead	45.6	1
TCGA-LL-A740-01A	TCGA-LL-A740-01A	9.638	MX	3	Alive	14.49	0
TCGA-C8-A130-01A	TCGA-C8-A130-01A	9.7	M0	1	Alive	12.16	0
TCGA-AN-A0FV-01A	TCGA-AN-A0FV-01A	9.707	M0	1	Alive	0.33	0
TCGA-BH-A0BA-01A	TCGA-BH-A0BA-01A	9.71	M0	1	Alive	37.19	0
TCGA-BH-A0BR-01A	TCGA-BH-A0BR-01A	9.711	M0	1	Alive	76.54	0
TCGA-A8-A0A1-01A	TCGA-A8-A0A1-01A	9.713	M0	1	Alive	11.99	0
TCGA-D8-A73W-01A	TCGA-D8-A73W-01A	9.675	MX	3	Dead	12.65	1
TCGA-AN-A0FT-01A	TCGA-AN-A0FT-01A	9.716	M0	1	Alive	7.03	0
TCGA-E2-A109-01A	TCGA-E2-A109-01A	9.716	M0	1	Alive	46.55	0
TCGA-A8-A090-01A	TCGA-A8-A090-01A	9.727	M0	1	Alive	0	0
TCGA-BH-A208-01A	TCGA-BH-A208-01A	9.729	M0	1	Dead	57.79	1
TCGA-D8-A27V-01A	TCGA-D8-A27V-01A	9.73	M0	1	Alive	12.52	0
TCGA-E9-A1NH-01A	TCGA-E9-A1NH-01A	9.731	M0	1	Alive	18.92	0
TCGA-E2-A15M-01A	TCGA-E2-A15M-01A	9.736	M0	1	Dead	11.04	1
TCGA-A2-A25E-01A	TCGA-A2-A25E-01A	9.738	M0	1	Alive	105.26	0
TCGA-E9-A1NA-01A	TCGA-E9-A1NA-01A	9.76	M0	1	Alive	36.53	0
TCGA-A8-A07Z-01A	TCGA-A8-A07Z-01A	9.763	M0	1	Alive	45.04	0
TCGA-E2-A1BC-01A	TCGA-E2-A1BC-01A	9.771	M0	1	Alive	16.46	0
TCGA-D8-A147-01A	TCGA-D8-A147-01A	9.773	M0	1	Alive	19.19	0
TCGA-LL-A5YP-01A	TCGA-LL-A5YP-01A	9.779	M0	1	Alive	14.78	0
TCGA-AC-A6IV-01A	TCGA-AC-A6IV-01A	9.716	MX	3	Alive	18.66	0
TCGA-AC-A3TN-01A	TCGA-AC-A3TN-01A	9.719	MX	3	Alive	14.98	0
TCGA-AC-A62X-01A	TCGA-AC-A62X-01A	9.725	MX	3	Alive	13.7	0
TCGA-E2-A10F-01A	TCGA-E2-A10F-01A	9.782	M0	1	Alive	28.84	0
TCGA-EW-A1OZ-01A	TCGA-EW-A1OZ-01A	9.784	M0	1	Alive	40.37	0
TCGA-A8-A09A-01A	TCGA-A8-A09A-01A	9.785	M0	1	Alive	9.99	0
TCGA-A7-A26H-01A	TCGA-A7-A26H-01A	9.796	M0	1	Alive	23.78	0
TCGA-EW-A1J2-01A	TCGA-EW-A1J2-01A	9.733	MX	3	Alive	13.24	0
TCGA-AR-A24W-01A	TCGA-AR-A24W-01A	9.796	M0	1	Alive	50.92	0
TCGA-A2-A0YI-01A	TCGA-A2-A0YI-01A	9.797	M0	1	Alive	49.44	0
TCGA-A7-A2KD-01A	TCGA-A7-A2KD-01A	9.749	MX	3	Alive	22.31	0
TCGA-B6-A0X5-01A	TCGA-B6-A0X5-01A	9.797	M0	1	Dead	68.89	1
TCGA-A1-A0SI-01A	TCGA-A1-A0SI-01A	9.799	M0	1	Alive	20.86	0
TCGA-AR-A0TY-01A	TCGA-AR-A0TY-01A	9.806	M0	1	Dead	55.81	1
TCGA-E2-A15H-01A	TCGA-E2-A15H-01A	9.806	M0	1	Alive	12.91	0
TCGA-A2-A0EO-01A	TCGA-A2-A0EO-01A	9.808	M0	1	Alive	80.22	0
TCGA-A2-A1G6-01A	TCGA-A2-A1G6-01A	9.81	M0	1	Alive	16.46	0
TCGA-D8-A1XL-01A	TCGA-D8-A1XL-01A	9.782	MX	3	Alive	19.91	0
TCGA-V7-A7HQ-01A	TCGA-V7-A7HQ-01A	9.822	M0	1	Alive	66.79	0
TCGA-D8-A1XU-01A	TCGA-D8-A1XU-01A	9.832	M0	1	Alive	12.98	0
TCGA-AN-A0FN-01A	TCGA-AN-A0FN-01A	9.84	M0	1	Alive	7.16	0
TCGA-A2-A0YG-01A	TCGA-A2-A0YG-01A	9.851	M0	1	Alive	21.88	0
TCGA-AO-A12D-01A	TCGA-AO-A12D-01A	9.851	M0	1	Alive	82.62	0
TCGA-AC-A4ZE-01A	TCGA-AC-A4ZE-01A	9.859	M0	1	Alive	29.24	0
TCGA-BH-A202-01A	TCGA-BH-A202-01A	9.864	M0	1	Alive	26.12	0
TCGA-AR-A24H-01A	TCGA-AR-A24H-01A	9.88	M0	1	Alive	160.78	0
TCGA-C8-A8HR-01A	TCGA-C8-A8HR-01A	9.882	M0	1	Alive	13.4	0
TCGA-EW-A1J1-01A	TCGA-EW-A1J1-01A	9.887	M0	1	Alive	18.89	0
TCGA-BH-A8FY-01A	TCGA-BH-A8FY-01A	9.895	M0	1	Dead	9.69	1
TCGA-D8-A4Z1-01A	TCGA-D8-A4Z1-01A	9.912	M0	1	Alive	21.65	0
TCGA-HN-A2OB-01A	TCGA-HN-A2OB-01A	9.918	M0	1	Dead	62.42	1
TCGA-E2-A15T-01A	TCGA-E2-A15T-01A	9.922	M0	1	Alive	51.35	0
TCGA-AC-A3W6-01A	TCGA-AC-A3W6-01A	9.836	MX	3	Alive	19.78	0
TCGA-A8-A08X-01A	TCGA-A8-A08X-01A	9.924	M0	1	Alive	42.97	0
TCGA-BH-A1F6-01A	TCGA-BH-A1F6-01A	9.844	MX	3	Dead	97.4	1
TCGA-D8-A1XM-01A	TCGA-D8-A1XM-01A	9.928	M0	1	Alive	17.67	0
TCGA-BH-A0DO-01B	TCGA-BH-A0DO-01B	9.941	M0	1	Alive	54.01	0
TCGA-AC-A2BK-01A	TCGA-AC-A2BK-01A	9.858	MX	3	Alive	73	0
TCGA-AN-A0XL-01A	TCGA-AN-A0XL-01A	9.948	M0	1	Alive	5.35	0
TCGA-EW-A2FV-01A	TCGA-EW-A2FV-01A	9.863	MX	3	Alive	25.89	0
TCGA-E2-A14Z-01A	TCGA-E2-A14Z-01A	9.948	M0	1	Dead	18.5	1
TCGA-AC-A23C-01A	TCGA-AC-A23C-01A	9.878	MX	3	Alive	19.22	0
TCGA-E2-A14Q-01A	TCGA-E2-A14Q-01A	9.953	M0	1	Alive	38.21	0
TCGA-A8-A09V-01A	TCGA-A8-A09V-01A	9.967	M0	1	Alive	15.01	0
TCGA-BH-A0DV-01A	TCGA-BH-A0DV-01A	9.971	M0	1	Alive	67.81	0
TCGA-LL-A6FR-01A	TCGA-LL-A6FR-01A	9.888	MX	3	Alive	16.06	0
TCGA-B6-A409-01A	TCGA-B6-A409-01A	9.976	M0	1	Dead	18.82	1
TCGA-AN-A0AK-01A	TCGA-AN-A0AK-01A	9.977	M0	1	Alive	7.36	0
TCGA-A8-A09M-01A	TCGA-A8-A09M-01A	9.981	M0	1	Alive	33.05	0
TCGA-BH-A18H-01A	TCGA-BH-A18H-01A	9.982	M0	1	Alive	21.42	0
TCGA-B6-A2IU-01A	TCGA-B6-A2IU-01A	9.985	M0	1	Alive	170.04	0
TCGA-A8-A06P-01A	TCGA-A8-A06P-01A	9.99	M0	1	Alive	13.01	0
TCGA-GI-A2C8-01A	TCGA-GI-A2C8-01A	9.938	MX	3	Alive	7.39	0
TCGA-E9-A229-01A	TCGA-E9-A229-01A	9.995	M0	1	Alive	37.71	0
TCGA-AC-A3W5-01A	TCGA-AC-A3W5-01A	9.942	MX	3	Alive	16.56	0
TCGA-E2-A1IJ-01A	TCGA-E2-A1IJ-01A	9.998	M0	1	Alive	28.42	0
TCGA-AO-A0JE-01A	TCGA-AO-A0JE-01A	10	M0	1	Alive	76.71	0
TCGA-A8-A09X-01A	TCGA-A8-A09X-01A	10.01	M0	1	Dead	13.99	1
TCGA-BH-A18P-01A	TCGA-BH-A18P-01A	10.01	M0	1	Dead	30.26	1
TCGA-OL-A5D6-01A	TCGA-OL-A5D6-01A	9.968	MX	3	Dead	36.27	1
TCGA-E9-A3X8-01A	TCGA-E9-A3X8-01A	10.01	M0	1	Alive	30.42	0
TCGA-A7-A6VV-01A	TCGA-A7-A6VV-01A	10.02	M0	1	Alive	10.28	0
TCGA-AN-A0AT-01A	TCGA-AN-A0AT-01A	10.02	M0	1	Alive	0.33	0
TCGA-AN-A0FZ-01A	TCGA-AN-A0FZ-01A	10.02	M0	1	Alive	0.33	0
TCGA-D8-A27M-01A	TCGA-D8-A27M-01A	10.02	M0	1	Alive	13.47	0
TCGA-UL-AAZ6-01A	TCGA-UL-AAZ6-01A	9.983	MX	3	Alive	17.02	0
TCGA-D8-A146-01A	TCGA-D8-A146-01A	9.984	MX	3	Alive	21.12	0
TCGA-E2-A10A-01A	TCGA-E2-A10A-01A	10.02	M0	1	Alive	40.37	0
TCGA-XX-A89A-01A	TCGA-XX-A89A-01A	9.987	MX	3	Alive	16.03	0
TCGA-A2-A4S3-01A	TCGA-A2-A4S3-01A	10.03	M0	1	Alive	21.88	0
TCGA-W8-A86G-01A	TCGA-W8-A86G-01A	9.99	MX	3	Alive	11.4	0
TCGA-B6-A0WZ-01A	TCGA-B6-A0WZ-01A	10.03	M0	1	Alive	206.7	0
TCGA-E2-A14R-01A	TCGA-E2-A14R-01A	10.03	M0	1	Alive	38.57	0
TCGA-B6-A0RN-01A	TCGA-B6-A0RN-01A	10.04	M0	1	Alive	263.07	0
TCGA-D8-A73X-01A	TCGA-D8-A73X-01A	10.04	M0	1	Alive	25.2	0
TCGA-E9-A1NE-01A	TCGA-E9-A1NE-01A	10.04	M0	1	Alive	35.74	0
TCGA-C8-A26Z-01A	TCGA-C8-A26Z-01A	10.05	M0	1	Alive	15.44	0
TCGA-AC-A3W7-01A	TCGA-AC-A3W7-01A	10.01	MX	3	Alive	15.47	0
TCGA-BH-A0BT-01A	TCGA-BH-A0BT-01A	10.06	M0	1	Alive	77.69	0
TCGA-E2-A10B-01A	TCGA-E2-A10B-01A	10.06	M0	1	Alive	37.48	0
TCGA-E9-A1R7-01A	TCGA-E9-A1R7-01A	10.06	M0	1	Alive	48.19	0
TCGA-A2-A3XS-01A	TCGA-A2-A3XS-01A	10.07	M0	1	Dead	33.9	1
TCGA-BH-A0AU-01A	TCGA-BH-A0AU-01A	10.07	M0	1	Alive	62.88	0
TCGA-E2-A1IO-01A	TCGA-E2-A1IO-01A	10.07	M0	1	Alive	60.94	0
TCGA-BH-A1FR-01A	TCGA-BH-A1FR-01A	10.09	M0	1	Dead	53.94	1
TCGA-JL-A3YW-01A	TCGA-JL-A3YW-01A	10.09	M0	1	Alive	11.83	0
TCGA-E2-A14Y-01A	TCGA-E2-A14Y-01A	10.1	M0	1	Alive	69.28	0
TCGA-E9-A22H-01A	TCGA-E9-A22H-01A	10.1	M0	1	Alive	40.47	0
TCGA-A2-A0CP-01A	TCGA-A2-A0CP-01A	10.12	M0	1	Alive	92.41	0
TCGA-AN-A0FW-01A	TCGA-AN-A0FW-01A	10.12	M0	1	Alive	0.36	0
TCGA-AR-A5QM-01A	TCGA-AR-A5QM-01A	10.12	M0	1	Alive	73.29	0
TCGA-EW-A6SD-01A	TCGA-EW-A6SD-01A	10.12	M0	1	Alive	33.18	0
TCGA-AO-A1KS-01A	TCGA-AO-A1KS-01A	10.13	M0	1	Alive	11.5	0
TCGA-A2-A0CX-01A	TCGA-A2-A0CX-01A	10.14	M0	1	Alive	56.77	0
TCGA-AR-A0TQ-01A	TCGA-AR-A0TQ-01A	10.14	M0	1	Alive	98.26	0
TCGA-E2-A572-01A	TCGA-E2-A572-01A	10.14	M0	1	Alive	39.68	0
TCGA-EW-A6S9-01A	TCGA-EW-A6S9-01A	10.14	M0	1	Alive	15.21	0
TCGA-BH-A0EE-01A	TCGA-BH-A0EE-01A	10.15	M0	1	Alive	30.98	0
TCGA-E2-A1LS-01A	TCGA-E2-A1LS-01A	10.15	M0	1	Alive	52.69	0
TCGA-AN-A046-01A	TCGA-AN-A046-01A	10.16	M0	1	Alive	0.33	0
TCGA-AC-A2FF-01A	TCGA-AC-A2FF-01A	10.11	MX	3	Alive	90.64	0
TCGA-OL-A66L-01A	TCGA-OL-A66L-01A	10.11	MX	3	Alive	42.74	0
TCGA-BH-A0B4-01A	TCGA-BH-A0B4-01A	10.16	M0	1	Alive	39.13	0
TCGA-EW-A3U0-01A	TCGA-EW-A3U0-01A	10.16	M0	1	Alive	17.48	0
TCGA-5L-AAT0-01A	TCGA-5L-AAT0-01A	10.17	M0	1	Alive	48.52	0
TCGA-A8-A09I-01A	TCGA-A8-A09I-01A	10.17	M0	1	Alive	45.04	0
TCGA-OL-A6VO-01A	TCGA-OL-A6VO-01A	10.12	MX	3	Alive	28.19	0
TCGA-BH-A0HX-01A	TCGA-BH-A0HX-01A	10.17	M0	1	Alive	27.23	0
TCGA-A2-A04X-01A	TCGA-A2-A04X-01A	10.18	M0	1	Alive	55.39	0
TCGA-A8-A08R-01A	TCGA-A8-A08R-01A	10.18	M0	1	Alive	0.99	0
TCGA-AR-A1AK-01A	TCGA-AR-A1AK-01A	10.18	M0	1	Alive	103.78	0
TCGA-PE-A5DC-01A	TCGA-PE-A5DC-01A	10.18	M0	1	Dead	46.98	1
TCGA-AC-A62Y-01A	TCGA-AC-A62Y-01A	10.14	MX	3	Alive	17.41	0
TCGA-LL-A5YL-01A	TCGA-LL-A5YL-01A	10.14	MX	3	Alive	17.05	0
TCGA-B6-A0RG-01A	TCGA-B6-A0RG-01A	10.19	M0	1	Alive	68.4	0
TCGA-BH-A1F5-01A	TCGA-BH-A1F5-01A	10.19	M0	1	Dead	89.09	1
TCGA-D8-A1XG-01A	TCGA-D8-A1XG-01A	10.19	M0	1	Alive	14.72	0
TCGA-EW-A1P0-01A	TCGA-EW-A1P0-01A	10.15	MX	3	Alive	41.1	0
TCGA-EW-A2FR-01A	TCGA-EW-A2FR-01A	10.15	MX	3	Alive	54.96	0
TCGA-EW-A424-01A	TCGA-EW-A424-01A	10.15	MX	3	Alive	23.49	0
TCGA-A8-A093-01A	TCGA-A8-A093-01A	10.2	M0	1	Alive	17.94	0
TCGA-A2-A0T2-01A	TCGA-A2-A0T2-01A	0	M1	2	Dead	8.38	1
TCGA-AO-A0J5-01A	TCGA-AO-A0J5-01A	6.286	M1	2	Dead	26.02	1
TCGA-AC-A62V-01A	TCGA-AC-A62V-01A	7.021	M1	2	Dead	11.43	1
TCGA-BH-A18J-01A	TCGA-BH-A18J-01A	7.625	M1	2	Dead	20.11	1
TCGA-A8-A08J-01A	TCGA-A8-A08J-01A	8.092	M1	2	Dead	37.02	1
TCGA-AR-A0TZ-01A	TCGA-AR-A0TZ-01A	8.365	M1	2	Dead	107.16	1
TCGA-B6-A0IB-01A	TCGA-B6-A0IB-01A	8.54	M1	2	Dead	129.47	1
TCGA-PL-A8LX-01A	TCGA-PL-A8LX-01A	8.646	M1	2	Alive	0.16	0
TCGA-B6-A0I9-01A	TCGA-B6-A0I9-01A	8.772	M1	2	Dead	11.89	1
TCGA-D8-A1Y1-01A	TCGA-D8-A1Y1-01A	10.18	MX	3	Dead	9.92	1
TCGA-A8-A08O-01A	TCGA-A8-A08O-01A	8.84	M1	2	Alive	30.98	0
TCGA-A2-A0SW-01A	TCGA-A2-A0SW-01A	9.499	M1	2	Dead	44.84	1
TCGA-A8-A07W-01A	TCGA-A8-A07W-01A	9.784	M1	2	Alive	9.99	0
TCGA-BH-A1FH-01A	TCGA-BH-A1FH-01A	10.15	M1	2	Dead	33.97	1
TCGA-EW-A2FS-01A	TCGA-EW-A2FS-01A	10.2	MX	3	Alive	52.69	0
TCGA-C8-A9FZ-01A	TCGA-C8-A9FZ-01A		M0	1	Alive	19.45	0
TCGA-E2-A14S-01A	TCGA-E2-A14S-01A		M0	1	Alive	33.15	0
TCGA-E9-A245-01A	TCGA-E9-A245-01A	11.14	M0	1	Dead		1
TCGA-LD-A7W5-01A	TCGA-LD-A7W5-01A		M0	1	Alive	7.1	0
TCGA-A8-A09C-01A	TCGA-A8-A09C-01A		MX	3	Alive	1.02	0
TCGA-AC-A5EI-01A	TCGA-AC-A5EI-01A		MX	3	Alive	14.52	0
TCGA-OL-A66H-01A	TCGA-OL-A66H-01A	8.459	MX	3	Alive		0
TCGA-BH-A0B2-01A	TCGA-BH-A0B2-01A	12.8
Total 1283; out of which
179 samples are
duplicated;
Out of this duplication
6 samples - triplicated
173 samples -duplicated
6 x 2 =12
173 x 1 = 173
Total 185
1283-185=1098 (TCGA)
Duplicates Removed
Xena Star Values
Cbioportal-rest

## Sheet: Meta-OS-04-12-19-Hi-50%
sample	sample	Star (fkpm+uq+1)	American Joint Committee on Cancer Metastasis Stage Code	M0=1; M1=2; MX=3	Patient's Vital Status	Overall Survival (Months)	Alive=0; Dead=1
TCGA-AR-A0U1-01A	TCGA-AR-A0U1-01A		M0	1	Alive	133.11	0
TCGA-S3-AA14-01A	TCGA-S3-AA14-01A	10.45	cM0 (i+)	1	Alive	17.38	0
TCGA-S3-AA17-01A	TCGA-S3-AA17-01A	11.32	cM0 (i+)	1	Alive	13.93	0
TCGA-BH-A5IZ-01A	TCGA-BH-A5IZ-01A	11.72	cM0 (i+)	1	Alive	18.63	0
TCGA-E2-A576-01A	TCGA-E2-A576-01A	10.22	MX	3	Alive	34.26	0
TCGA-BH-A18I-01A	TCGA-BH-A18I-01A	12.64	cM0 (i+)	1	Alive	35.91	0
TCGA-S3-AA15-01A	TCGA-S3-AA15-01A	13.32	cM0 (i+)	1	Alive	17.25	0
TCGA-E2-A14O-01A	TCGA-E2-A14O-01A	10.21	M0	1	Alive	44.65	0
TCGA-A2-A0SX-01A	TCGA-A2-A0SX-01A	10.22	M0	1	Alive	50.39	0
TCGA-BH-A0B3-01A	TCGA-BH-A0B3-01A	10.22	M0	1	Alive	39.52	0
TCGA-E9-A1RE-01A	TCGA-E9-A1RE-01A	10.25	M0	1	Alive	46.62	0
TCGA-BH-A0B1-01A	TCGA-BH-A0B1-01A	10.26	M0	1	Alive	37.71	0
TCGA-BH-AB28-01A	TCGA-BH-AB28-01A	10.26	M0	1	Alive	9.43	0
TCGA-A7-A26J-01A	TCGA-A7-A26J-01A	10.27	M0	1	Alive	20.6	0
TCGA-A8-A06T-01A	TCGA-A8-A06T-01A	10.27	M0	1	Alive	53.02	0
TCGA-A8-A0A2-01A	TCGA-A8-A0A2-01A	10.27	M0	1	Alive	19.02	0
TCGA-B6-A0IH-01A	TCGA-B6-A0IH-01A	10.27	M0	1	Dead	112.29	1
TCGA-C8-A3M7-01A	TCGA-C8-A3M7-01A	10.27	M0	1	Dead	33.97	1
TCGA-D8-A1XA-01A	TCGA-D8-A1XA-01A	10.27	M0	1	Alive	27.56	0
TCGA-EW-A1J3-01A	TCGA-EW-A1J3-01A	10.27	M0	1	Alive	16.56	0
TCGA-A7-A13F-01A	TCGA-A7-A13F-01A	10.28	M0	1	Alive	25.13	0
TCGA-AQ-A7U7-01A	TCGA-AQ-A7U7-01A	10.28	M0	1	Dead	19.19	1
TCGA-AC-A7VC-01A	TCGA-AC-A7VC-01A	10.31	MX	3	Alive	0.03	0
TCGA-EW-A1OV-01A	TCGA-EW-A1OV-01A	10.31	MX	3	Alive	25.92	0
TCGA-AR-A0TT-01A	TCGA-AR-A0TT-01A	10.28	M0	1	Alive	108.94	0
TCGA-BH-A0BD-01A	TCGA-BH-A0BD-01A	10.28	M0	1	Alive	18.2	0
TCGA-E9-A1R6-01A	TCGA-E9-A1R6-01A	10.29	M0	1	Alive	11.14	0
TCGA-BH-A0BP-01A	TCGA-BH-A0BP-01A	10.3	M0	1	Dead	75.43	1
TCGA-A8-A091-01A	TCGA-A8-A091-01A	10.31	M0	1	Alive	32.98	0
TCGA-A7-A0CG-01A	TCGA-A7-A0CG-01A	10.32	M0	1	Alive	34.26	0
TCGA-A8-A097-01A	TCGA-A8-A097-01A	10.32	M0	1	Alive	11.99	0
TCGA-AR-A24U-01A	TCGA-AR-A24U-01A	10.32	M0	1	Alive	102.76	0
TCGA-E2-A108-01A	TCGA-E2-A108-01A	10.32	M0	1	Alive	27.5	0
TCGA-AC-A3QP-01A	TCGA-AC-A3QP-01A	10.34	MX	3	Alive	22.17	0
TCGA-OL-A5RW-01A	TCGA-OL-A5RW-01A	10.34	MX	3	Alive	36.33	0
TCGA-OL-A66O-01A	TCGA-OL-A66O-01A	10.34	MX	3	Alive	17.35	0
TCGA-AN-A0XO-01A	TCGA-AN-A0XO-01A	10.33	M0	1	Alive	12.32	0
TCGA-D8-A1JH-01A	TCGA-D8-A1JH-01A	10.33	M0	1	Alive	13.99	0
TCGA-AR-A2LR-01A	TCGA-AR-A2LR-01A	10.34	M0	1	Alive	57.23	0
TCGA-OL-A5RV-01A	TCGA-OL-A5RV-01A	10.36	MX	3	Alive	34.89	0
TCGA-3C-AAAU-01A	TCGA-3C-AAAU-01A	10.37	MX	3	Alive	132.95	0
TCGA-B6-A0IQ-01A	TCGA-B6-A0IQ-01A	10.34	M0	1	Alive	140.77	0
TCGA-BH-A1EW-01A	TCGA-BH-A1EW-01A	10.34	M0	1	Dead	55.65	1
TCGA-AR-A2LK-01A	TCGA-AR-A2LK-01A	10.35	M0	1	Dead	54.17	1
TCGA-E2-A14N-01A	TCGA-E2-A14N-01A	10.35	M0	1	Alive	47.11	0
TCGA-BH-A1FU-01A	TCGA-BH-A1FU-01A	10.36	M0	1	Dead	55.45	1
TCGA-B6-A0IM-01A	TCGA-B6-A0IM-01A	10.38	M0	1	Dead	127.23	1
TCGA-BH-A18F-01A	TCGA-BH-A18F-01A	10.38	M0	1	Alive	32.88	0
TCGA-AR-A252-01A	TCGA-AR-A252-01A	10.39	M0	1	Alive	93.23	0
TCGA-BH-A0H6-01A	TCGA-BH-A0H6-01A	10.39	M0	1	Alive	24.54	0
TCGA-D8-A1J9-01A	TCGA-D8-A1J9-01A	10.39	M0	1	Alive	17.48	0
TCGA-E2-A1IU-01A	TCGA-E2-A1IU-01A	10.39	M0	1	Alive	11.07	0
TCGA-BH-A0BC-01A	TCGA-BH-A0BC-01A	10.4	M0	1	Alive	32	0
TCGA-AQ-A1H3-01A	TCGA-AQ-A1H3-01A	10.41	MX	3	Alive	32.49	0
TCGA-OL-A5DA-01A	TCGA-OL-A5DA-01A	10.41	MX	3	Alive	58.57	0
TCGA-C8-A8HP-01A	TCGA-C8-A8HP-01A	10.4	M0	1	Alive	13.01	0
TCGA-EW-A3E8-01B	TCGA-EW-A3E8-01B	10.42	MX	3	Alive	34	0
TCGA-EW-A1PF-01A	TCGA-EW-A1PF-01A	10.4	M0	1	Alive	14.42	0
TCGA-A2-A0SY-01A	TCGA-A2-A0SY-01A	10.41	M0	1	Alive	44.25	0
TCGA-AN-A0FX-01A	TCGA-AN-A0FX-01A	10.41	M0	1	Alive	0.33	0
TCGA-AO-A0JD-01A	TCGA-AO-A0JD-01A	10.41	M0	1	Alive	71.94	0
TCGA-A8-A0A4-01A	TCGA-A8-A0A4-01A	10.42	M0	1	Alive	13.01	0
TCGA-EW-A1P1-01A	TCGA-EW-A1P1-01A	10.43	MX	3	Alive	39.75	0
TCGA-3C-AALK-01A	TCGA-3C-AALK-01A	10.43	M0	1	Alive	47.57	0
TCGA-A8-A07G-01A	TCGA-A8-A07G-01A	10.43	M0	1	Alive	18.96	0
TCGA-BH-A0C3-01A	TCGA-BH-A0C3-01A	10.43	M0	1	Alive	88.99	0
TCGA-E2-A1IF-01A	TCGA-E2-A1IF-01A	10.43	M0	1	Alive	37.39	0
TCGA-E2-A1LI-01A	TCGA-E2-A1LI-01A	10.43	M0	1	Alive	102.53	0
TCGA-AR-A2LQ-01A	TCGA-AR-A2LQ-01A	10.44	M0	1	Alive	40.51	0
TCGA-BH-A0E9-01B	TCGA-BH-A0E9-01B	10.44	M0	1	Alive	81.77	0
TCGA-E2-A2P5-01A	TCGA-E2-A2P5-01A	10.44	M0	1	Dead	26.97	1
TCGA-A2-A1G0-01A	TCGA-A2-A1G0-01A	10.46	M0	1	Alive	20.24	0
TCGA-AC-A2QI-01A	TCGA-AC-A2QI-01A	10.47	MX	3	Alive	19.32	0
TCGA-D8-A27I-01A	TCGA-D8-A27I-01A	10.46	M0	1	Alive	14.42	0
TCGA-E2-A153-01A	TCGA-E2-A153-01A	10.46	M0	1	Alive	23.23	0
TCGA-GM-A2D9-01A	TCGA-GM-A2D9-01A	10.46	M0	1	Dead	59.53	1
TCGA-A7-A26E-01A	TCGA-A7-A26E-01A	10.48	MX	3	Alive	31.34	0
TCGA-E2-A1IK-01A	TCGA-E2-A1IK-01A	10.47	M0	1	Alive	59.13	0
TCGA-AR-A24R-01A	TCGA-AR-A24R-01A	10.48	M0	1	Alive	112.68	0
TCGA-C8-A12O-01A	TCGA-C8-A12O-01A	10.48	M0	1	Alive	12.65	0
TCGA-E2-A1IG-01A	TCGA-E2-A1IG-01A	10.48	M0	1	Alive	70.3	0
TCGA-AC-A3TM-01A	TCGA-AC-A3TM-01A	10.49	M0	1	Alive	25.03	0
TCGA-AO-A124-01A	TCGA-AO-A124-01A	10.49	M0	1	Alive	115.18	0
TCGA-A8-A0A6-01A	TCGA-A8-A0A6-01A	10.5	M0	1	Alive	21.02	0
TCGA-B6-A0RQ-01A	TCGA-B6-A0RQ-01A	10.5	M0	1	Dead	140.18	1
TCGA-BH-A1FG-01A	TCGA-BH-A1FG-01A	10.5	M0	1	Dead	122.73	1
TCGA-C8-A1HN-01A	TCGA-C8-A1HN-01A	10.5	M0	1	Alive	12.94	0
TCGA-GM-A3XG-01A	TCGA-GM-A3XG-01A	10.5	M0	1	Alive	43.69	0
TCGA-C8-A9FZ-01A	TCGA-C8-A9FZ-01A		M0	1	Alive	19.45	0
TCGA-A2-A04V-01A	TCGA-A2-A04V-01A	10.52	M0	1	Dead	63.07	1
TCGA-E2-A15S-01A	TCGA-E2-A15S-01A	10.52	M0	1	Alive	14.06	0
TCGA-E9-A1NC-01A	TCGA-E9-A1NC-01A	10.52	M0	1	Alive	39.52	0
TCGA-EW-A1J6-01A	TCGA-EW-A1J6-01A	10.52	M0	1	Alive	28.75	0
TCGA-BH-A1EO-01A	TCGA-BH-A1EO-01A	10.53	M0	1	Dead	91.92	1
TCGA-OL-A66P-01A	TCGA-OL-A66P-01A	10.54	MX	3	Alive	14.06	0
TCGA-C8-A12W-01A	TCGA-C8-A12W-01A	10.53	M0	1	Alive	12.65	0
TCGA-E9-A1R0-01A	TCGA-E9-A1R0-01A	10.53	M0	1	Alive	28.25	0
TCGA-AR-A256-01A	TCGA-AR-A256-01A	10.54	M0	1	Dead	93.76	1
TCGA-S3-AA11-01A	TCGA-S3-AA11-01A	10.54	M0	1	Alive	13.83	0
TCGA-A8-A0A7-01A	TCGA-A8-A0A7-01A	10.55	M0	1	Alive	0.99	0
TCGA-BH-A201-01A	TCGA-BH-A201-01A	10.55	M0	1	Alive	28.12	0
TCGA-A8-A084-01A	TCGA-A8-A084-01A	10.56	M0	1	Alive	15.05	0
TCGA-A7-A3J1-01A	TCGA-A7-A3J1-01A	10.58	MX	3	Alive	11.27	0
TCGA-AR-A0TU-01A	TCGA-AR-A0TU-01A	10.56	M0	1	Alive	23.29	0
TCGA-C8-A12N-01A	TCGA-C8-A12N-01A	10.56	M0	1	Alive	11.76	0
TCGA-E2-A107-01A	TCGA-E2-A107-01A	10.57	M0	1	Alive	34.4	0
TCGA-A7-A4SC-01A	TCGA-A7-A4SC-01A	10.6	MX	3	Alive	14.65	0
TCGA-B6-A0WW-01A	TCGA-B6-A0WW-01A	10.6	MX	3	Dead	18.33	1
TCGA-AR-A255-01A	TCGA-AR-A255-01A	10.58	M0	1	Alive	70.99	0
TCGA-OL-A6VR-01A	TCGA-OL-A6VR-01A	10.61	MX	3	Alive	40.08	0
TCGA-BH-A0EA-01A	TCGA-BH-A0EA-01A	10.59	M0	1	Dead	32.56	1
TCGA-BH-A1EU-01A	TCGA-BH-A1EU-01A	10.6	M0	1	Dead	42.25	1
TCGA-D8-A1JB-01A	TCGA-D8-A1JB-01A	10.6	M0	1	Alive	55.45	0
TCGA-E2-A1L7-01A	TCGA-E2-A1L7-01A	10.61	M0	1	Alive	60.32	0
TCGA-AO-A0JB-01A	TCGA-AO-A0JB-01A	10.62	M0	1	Alive	50.66	0
TCGA-A2-A0T6-01A	TCGA-A2-A0T6-01A	10.63	M0	1	Alive	18.89	0
TCGA-BH-A0BL-01A	TCGA-BH-A0BL-01A	10.63	M0	1	Alive	74.84	0
TCGA-AC-A3BB-01A	TCGA-AC-A3BB-01A	10.64	MX	3	Alive	32.42	0
TCGA-GM-A2DD-01A	TCGA-GM-A2DD-01A	10.63	M0	1	Alive	74.97	0
TCGA-AO-A0JJ-01A	TCGA-AO-A0JJ-01A	10.64	M0	1	Alive	61.99	0
TCGA-E2-A159-01A	TCGA-E2-A159-01A	10.64	M0	1	Alive	25.03	0
TCGA-GM-A4E0-01A	TCGA-GM-A4E0-01A	10.64	M0	1	Alive	71.98	0
TCGA-A2-A0ER-01A	TCGA-A2-A0ER-01A	10.65	M0	1	Alive	74.34	0
TCGA-E9-A1N5-01A	TCGA-E9-A1N5-01A	10.65	M0	1	Alive	36.79	0
TCGA-AC-A2FO-01A	TCGA-AC-A2FO-01A	10.66	MX	3	Alive	74.08	0
TCGA-EW-A1P4-01A	TCGA-EW-A1P4-01A	10.65	M0	1	Alive	29.8	0
TCGA-HN-A2NL-01A	TCGA-HN-A2NL-01A	10.65	M0	1	Alive	2.6	0
TCGA-A8-A06O-01A	TCGA-A8-A06O-01A	10.66	M0	1	Alive	13.01	0
TCGA-E2-A1L6-01A	TCGA-E2-A1L6-01A	10.66	M0	1	Alive	54.14	0
TCGA-AC-A2FM-01A	TCGA-AC-A2FM-01A	10.67	M0	1	Dead	26.02	1
TCGA-E2-A574-01A	TCGA-E2-A574-01A	10.67	M0	1	Alive	38.73	0
TCGA-A8-A07I-01A	TCGA-A8-A07I-01A	10.68	M0	1	Alive	13.99	0
TCGA-B6-A0IG-01A	TCGA-B6-A0IG-01A	10.68	M0	1	Dead	146.39	1
TCGA-AR-A1AT-01A	TCGA-AR-A1AT-01A	10.69	M0	1	Dead	41.79	1
TCGA-E9-A5FK-01A	TCGA-E9-A5FK-01A	10.69	M0	1	Alive	26.68	0
TCGA-AR-A0TS-01A	TCGA-AR-A0TS-01A	10.7	M0	1	Alive	84.03	0
TCGA-OL-A5RZ-01A	TCGA-OL-A5RZ-01A	10.71	MX	3	Alive	22.31	0
TCGA-B6-A0IK-01A	TCGA-B6-A0IK-01A	10.7	M0	1	Dead	18.76	1
TCGA-AC-A2FE-01A	TCGA-AC-A2FE-01A	10.72	MX	3	Dead	86.6	1
TCGA-EW-A1PC-01B	TCGA-EW-A1PC-01B	10.72	MX	3	Alive	6.14	0
TCGA-EW-A6SA-01A	TCGA-EW-A6SA-01A	10.72	MX	3	Alive	16.75	0
TCGA-BH-A0W4-01A	TCGA-BH-A0W4-01A	10.7	M0	1	Alive	24.93	0
TCGA-MS-A51U-01A	TCGA-MS-A51U-01A	10.7	M0	1	Alive	22.37	0
TCGA-C8-A26W-01A	TCGA-C8-A26W-01A	10.71	M0	1	Alive	12.52	0
TCGA-A2-A0T1-01A	TCGA-A2-A0T1-01A	10.72	M0	1	Alive	17.12	0
TCGA-A7-A0CJ-01A	TCGA-A7-A0CJ-01A	10.73	M0	1	Alive	30.58	0
TCGA-A8-A08B-01A	TCGA-A8-A08B-01A	10.73	M0	1	Alive	37.98	0
TCGA-E9-A6HE-01A	TCGA-E9-A6HE-01A	10.73	MX	3	Alive	27.83	0
TCGA-AN-A0XT-01A	TCGA-AN-A0XT-01A	10.73	M0	1	Alive	0.33	0
TCGA-BH-A0GZ-01A	TCGA-BH-A0GZ-01A	10.73	M0	1	Alive	10.78	0
TCGA-E9-A1N6-01A	TCGA-E9-A1N6-01A	10.73	M0	1	Dead	22.27	1
TCGA-E9-A22D-01A	TCGA-E9-A22D-01A	10.73	M0	1	Alive	41	0
TCGA-LL-A9Q3-01A	TCGA-LL-A9Q3-01A	10.75	MX	3	Alive	17.48	0
TCGA-D8-A1Y0-01A	TCGA-D8-A1Y0-01A	10.76	MX	3	Alive	15.51	0
TCGA-A2-A0EU-01A	TCGA-A2-A0EU-01A	10.74	M0	1	Alive	34.26	0
TCGA-BH-A0DG-01A	TCGA-BH-A0DG-01A	10.75	M0	1	Alive	67.05	0
TCGA-BH-A1FE-01A	TCGA-BH-A1FE-01A	10.75	M0	1	Dead	74.67	1
TCGA-GM-A2DC-01A	TCGA-GM-A2DC-01A	10.75	M0	1	Alive	83.28	0
TCGA-A2-A0YH-01A	TCGA-A2-A0YH-01A	10.77	M0	1	Alive	21.65	0
TCGA-AQ-A04L-01B	TCGA-AQ-A04L-01B	10.79	MX	3	Alive	129.99	0
TCGA-BH-A0H7-01A	TCGA-BH-A0H7-01A	10.77	M0	1	Alive	23.06	0
TCGA-C8-A273-01A	TCGA-C8-A273-01A	10.77	M0	1	Alive	16.85	0
TCGA-BH-A0DE-01A	TCGA-BH-A0DE-01A	10.79	M0	1	Alive	77.92	0
TCGA-A8-A076-01A	TCGA-A8-A076-01A	10.8	M0	1	Alive	53.94	0
TCGA-AR-A2LO-01A	TCGA-AR-A2LO-01A	10.8	M0	1	Alive	39.36	0
TCGA-A7-A425-01A	TCGA-A7-A425-01A	10.8	MX	3	Alive	14.68	0
TCGA-E2-A14S-01A	TCGA-E2-A14S-01A		M0	1	Alive	33.15	0
TCGA-OL-A5S0-01A	TCGA-OL-A5S0-01A	10.8	MX	3	Alive	20.37	0
TCGA-BH-A1F8-01A	TCGA-BH-A1F8-01A	10.8	M0	1	Dead	25.07	1
TCGA-C8-A1HJ-01A	TCGA-C8-A1HJ-01A	10.8	M0	1	Alive	0.16	0
TCGA-E2-A1IH-01A	TCGA-E2-A1IH-01A	10.8	M0	1	Alive	33.71	0
TCGA-A2-A4RW-01A	TCGA-A2-A4RW-01A	10.81	M0	1	Alive	7.29	0
TCGA-A8-A083-01A	TCGA-A8-A083-01A	10.81	M0	1	Alive	0	0
TCGA-AC-A8OP-01A	TCGA-AC-A8OP-01A	10.83	MX	3	Alive	20.17	0
TCGA-E2-A14T-01A	TCGA-E2-A14T-01A	10.81	M0	1	Alive	75.92	0
TCGA-OK-A5Q2-01A	TCGA-OK-A5Q2-01A	10.84	MX	3	Alive	2.1	0
TCGA-AC-A2QH-01B	TCGA-AC-A2QH-01B	10.85	MX	3	Alive	33.02	0
TCGA-GM-A5PV-01A	TCGA-GM-A5PV-01A	10.81	M0	1	Alive	13.53	0
TCGA-A1-A0SB-01A	TCGA-A1-A0SB-01A	10.83	M0	1	Alive	8.51	0
TCGA-AC-A2FK-01A	TCGA-AC-A2FK-01A	10.84	M0	1	Alive	87.06	0
TCGA-A2-A0CL-01A	TCGA-A2-A0CL-01A	10.86	M0	1	Alive	99.05	0
TCGA-A2-A0YF-01A	TCGA-A2-A0YF-01A	10.87	M0	1	Alive	50.43	0
TCGA-A2-A25A-01A	TCGA-A2-A25A-01A	10.87	M0	1	Alive	107.62	0
TCGA-BH-A0BF-01A	TCGA-BH-A0BF-01A	10.87	M0	1	Dead	43.5	1
TCGA-AN-A0XV-01A	TCGA-AN-A0XV-01A	10.88	M0	1	Alive	5.32	0
TCGA-S3-A6ZH-01A	TCGA-S3-A6ZH-01A	10.89	MX	3	Alive	21.06	0
TCGA-AO-A03M-01B	TCGA-AO-A03M-01B	10.88	M0	1	Alive	61.3	0
TCGA-B6-A0WY-01A	TCGA-B6-A0WY-01A	10.88	M0	1	Dead	113.7	1
TCGA-C8-A1HG-01A	TCGA-C8-A1HG-01A	10.89	M0	1	Alive	11.33	0
TCGA-A2-A0D3-01A	TCGA-A2-A0D3-01A	10.9	M0	1	Alive	61.53	0
TCGA-BH-A0HA-01A	TCGA-BH-A0HA-01A	10.9	M0	1	Alive	52.92	0
TCGA-AR-A2LJ-01A	TCGA-AR-A2LJ-01A	10.9	MX	3	Alive	86.47	0
TCGA-D8-A1Y2-01A	TCGA-D8-A1Y2-01A	10.9	MX	3	Alive	14.22	0
TCGA-BH-A0HB-01A	TCGA-BH-A0HB-01A	10.9	M0	1	Alive	26.48	0
TCGA-BH-A0HW-01A	TCGA-BH-A0HW-01A	10.9	M0	1	Alive	51.28	0
TCGA-EW-A1J5-01A	TCGA-EW-A1J5-01A	10.9	M0	1	Alive	15.67	0
TCGA-A2-A3XY-01A	TCGA-A2-A3XY-01A	10.91	M0	1	Dead	35.91	1
TCGA-BH-A0BW-01A	TCGA-BH-A0BW-01A	10.91	M0	1	Alive	77.89	0
TCGA-E9-A54Y-01A	TCGA-E9-A54Y-01A	10.91	M0	1	Alive	23.82	0
TCGA-EW-A1IX-01A	TCGA-EW-A1IX-01A	10.94	MX	3	Alive	39.68	0
TCGA-A7-A5ZX-01A	TCGA-A7-A5ZX-01A	10.92	M0	1	Alive	11.04	0
TCGA-A8-A09K-01A	TCGA-A8-A09K-01A	10.93	M0	1	Alive	29.96	0
TCGA-BH-A0BO-01A	TCGA-BH-A0BO-01A	10.94	M0	1	Alive	72.17	0
TCGA-A2-A1G4-01A	TCGA-A2-A1G4-01A	10.95	M0	1	Alive	19.55	0
TCGA-AO-A1KO-01A	TCGA-AO-A1KO-01A	10.95	M0	1	Alive	20.43	0
TCGA-AR-A1AM-01A	TCGA-AR-A1AM-01A	10.95	M0	1	Alive	98.26	0
TCGA-A7-A426-01A	TCGA-A7-A426-01A	10.96	MX	3	Alive	11.96	0
TCGA-D8-A1XK-01A	TCGA-D8-A1XK-01A	10.96	MX	3	Alive	14.49	0
TCGA-B6-A0WX-01A	TCGA-B6-A0WX-01A	10.95	M0	1	Dead	20.99	1
TCGA-BH-A0W3-01A	TCGA-BH-A0W3-01A	10.95	M0	1	Alive	23.92	0
TCGA-BH-A204-01A	TCGA-BH-A204-01A	10.96	M0	1	Dead	83.25	1
TCGA-A8-A0AB-01A	TCGA-A8-A0AB-01A	10.97	M0	1	Alive	17.02	0
TCGA-BH-A18Q-01A	TCGA-BH-A18Q-01A	10.97	M0	1	Dead	55.58	1
TCGA-C8-A26Y-01A	TCGA-C8-A26Y-01A	10.97	M0	1	Alive	12.94	0
TCGA-AC-A8OQ-01A	TCGA-AC-A8OQ-01A	10.98	MX	3	Alive	1.12	0
TCGA-OL-A5D8-01A	TCGA-OL-A5D8-01A	10.98	MX	3	Alive	31.96	0
TCGA-A2-A04P-01A	TCGA-A2-A04P-01A	10.98	M0	1	Dead	18	1
TCGA-D8-A141-01A	TCGA-D8-A141-01A	10.98	M0	1	Alive	20.57	0
TCGA-E2-A15P-01A	TCGA-E2-A15P-01A	10.98	M0	1	Alive	19.55	0
TCGA-A7-A5ZW-01A	TCGA-A7-A5ZW-01A	10.99	M0	1	Alive	10.71	0
TCGA-A7-A0CE-01A	TCGA-A7-A0CE-01A	11	M0	1	Alive	35.28	0
TCGA-A7-A5ZV-01A	TCGA-A7-A5ZV-01A	11	M0	1	Alive	12.09	0
TCGA-AQ-A54N-01A	TCGA-AQ-A54N-01A	11	M0	1	Alive	2.56	0
TCGA-BH-A6R9-01A	TCGA-BH-A6R9-01A	11.01	M0	1	Alive	5.26	0
TCGA-E9-A227-01A	TCGA-E9-A227-01A	11.01	M0	1	Alive	32.03	0
TCGA-GM-A3NY-01A	TCGA-GM-A3NY-01A	11.01	M0	1	Alive	38.17	0
TCGA-A2-A0EW-01A	TCGA-A2-A0EW-01A	11.02	M0	1	Dead	61.89	1
TCGA-AN-A0XN-01A	TCGA-AN-A0XN-01A	11.03	M0	1	Alive	0.33	0
TCGA-AR-A1AR-01A	TCGA-AR-A1AR-01A	11.03	M0	1	Dead	17.21	1
TCGA-3C-AALI-01A	TCGA-3C-AALI-01A	11.04	M0	1	Alive	131.57	0
TCGA-AO-A0J4-01A	TCGA-AO-A0J4-01A	11.06	M0	1	Alive	52.14	0
TCGA-A8-A095-01A	TCGA-A8-A095-01A	11.07	M0	1	Alive	41.95	0
TCGA-LD-A74U-01A	TCGA-LD-A74U-01A	11.07	M0	1	Alive	13.21	0
TCGA-A2-A4S2-01A	TCGA-A2-A4S2-01A	11.08	M0	1	Alive	21.12	0
TCGA-E9-A1QZ-01A	TCGA-E9-A1QZ-01A	11.08	M0	1	Alive	24.8	0
TCGA-GM-A2DH-01A	TCGA-GM-A2DH-01A	11.08	M0	1	Alive	72.04	0
TCGA-A8-A08I-01A	TCGA-A8-A08I-01A	11.09	M0	1	Alive	11.99	0
TCGA-E2-A1IE-01A	TCGA-E2-A1IE-01A	11.09	M0	1	Alive	77.6	0
TCGA-EW-A1IZ-01A	TCGA-EW-A1IZ-01A	11.11	MX	3	Alive	18.2	0
TCGA-BH-A0DT-01A	TCGA-BH-A0DT-01A	11.11	M0	1	Alive	78.94	0
TCGA-E2-A10C-01A	TCGA-E2-A10C-01A	11.11	M0	1	Alive	40.08	0
TCGA-A7-A4SA-01A	TCGA-A7-A4SA-01A	11.13	M0	1	Alive	14.91	0
TCGA-GM-A3XN-01A	TCGA-GM-A3XN-01A	11.13	M0	1	Alive	66.33	0
TCGA-A2-A0CU-01A	TCGA-A2-A0CU-01A	11.14	M0	1	Dead	5.19	1
TCGA-A8-A08G-01A	TCGA-A8-A08G-01A	11.14	M0	1	Alive	19.94	0
TCGA-BH-A1EV-01A	TCGA-BH-A1EV-01A	11.14	M0	1	Dead	11.99	1
TCGA-E2-A15C-01A	TCGA-E2-A15C-01A	11.14	M0	1	Alive	22.8	0
TCGA-D8-A1XD-01A	TCGA-D8-A1XD-01A	11.15	M0	1	Alive	17.15	0
TCGA-E2-A3DX-01A	TCGA-E2-A3DX-01A	11.15	M0	1	Alive	43.53	0
TCGA-A2-A0D2-01A	TCGA-A2-A0D2-01A	11.16	M0	1	Alive	33.74	0
TCGA-LL-A73Y-01A	TCGA-LL-A73Y-01A	11.16	MX	3	Alive	15.67	0
TCGA-BH-A1FB-01A	TCGA-BH-A1FB-01A	11.16	M0	1	Dead	120.53	1
TCGA-C8-A132-01A	TCGA-C8-A132-01A	11.16	M0	1	Alive	12.58	0
TCGA-A2-A3XZ-01A	TCGA-A2-A3XZ-01A	11.17	M0	1	Alive	50.33	0
TCGA-AC-A2FB-01A	TCGA-AC-A2FB-01A	11.18	MX	3	Alive	40.54	0
TCGA-E2-A150-01A	TCGA-E2-A150-01A	11.17	M0	1	Alive	63.57	0
TCGA-A2-A0EN-01A	TCGA-A2-A0EN-01A	11.18	M0	1	Alive	134.3	0
TCGA-AC-A8OS-01A	TCGA-AC-A8OS-01A	11.2	MX	3	Alive	2.3	0
TCGA-A1-A0SF-01A	TCGA-A1-A0SF-01A	11.2	M0	1	Alive	48.06	0
TCGA-A2-A0CQ-01A	TCGA-A2-A0CQ-01A	11.2	M0	1	Alive	88.53	0
TCGA-A8-A086-01A	TCGA-A8-A086-01A	11.21	M0	1	Alive	13.01	0
TCGA-AR-A1AP-01A	TCGA-AR-A1AP-01A	11.21	M0	1	Alive	93.82	0
TCGA-C8-A1HM-01A	TCGA-C8-A1HM-01A	11.23	M0	1	Alive	12.32	0
TCGA-AR-A1AL-01A	TCGA-AR-A1AL-01A	11.24	M0	1	Alive	97.6	0
TCGA-BH-A0B0-01A	TCGA-BH-A0B0-01A	11.24	M0	1	Alive	81.37	0
TCGA-JL-A3YX-01A	TCGA-JL-A3YX-01A	11.24	M0	1	Alive	11.56	0
TCGA-A2-A0EY-01A	TCGA-A2-A0EY-01A	11.26	M0	1	Alive	63.24	0
TCGA-BH-A0DX-01A	TCGA-BH-A0DX-01A	11.26	M0	1	Alive	70.83	0
TCGA-BH-A0C0-01A	TCGA-BH-A0C0-01A	11.27	M0	1	Alive	41.72	0
TCGA-BH-A0DK-01A	TCGA-BH-A0DK-01A	11.27	M0	1	Alive	13.9	0
TCGA-AC-A23G-01A	TCGA-AC-A23G-01A	11.29	MX	3	Alive	73.85	0
TCGA-AR-A24N-01A	TCGA-AR-A24N-01A	11.28	M0	1	Alive	99.7	0
TCGA-BH-A42V-01A	TCGA-BH-A42V-01A	11.29	M0	1	Alive	20.86	0
TCGA-AO-A12A-01A	TCGA-AO-A12A-01A	11.3	M0	1	Alive	102.23	0
TCGA-AR-A0TX-01A	TCGA-AR-A0TX-01A	11.3	M0	1	Alive	64.78	0
TCGA-AR-A5QP-01A	TCGA-AR-A5QP-01A	11.31	M0	1	Alive	38.93	0
TCGA-OL-A5RU-01A	TCGA-OL-A5RU-01A	11.32	MX	3	Alive	40.05	0
TCGA-D8-A1XF-01A	TCGA-D8-A1XF-01A	11.32	M0	1	Alive	15.21	0
TCGA-A2-A0T3-01A	TCGA-A2-A0T3-01A	11.33	M0	1	Alive	49.8	0
TCGA-BH-A0H3-01A	TCGA-BH-A0H3-01A	11.33	M0	1	Alive	63.34	0
TCGA-E9-A245-01A	TCGA-E9-A245-01A	11.14	M0	1	Dead		1
TCGA-EW-A1PH-01A	TCGA-EW-A1PH-01A	11.33	M0	1	Alive	19.94	0
TCGA-E9-A2JS-01A	TCGA-E9-A2JS-01A	11.34	M0	1	Dead	29.7	1
TCGA-A2-A0CZ-01A	TCGA-A2-A0CZ-01A	11.35	M0	1	Alive	53.09	0
TCGA-BH-A28O-01A	TCGA-BH-A28O-01A	11.35	M0	1	Alive	36.79	0
TCGA-B6-A0WS-01A	TCGA-B6-A0WS-01A	11.35	MX	3	Dead	97.4	1
TCGA-D8-A1XB-01A	TCGA-D8-A1XB-01A	11.35	M0	1	Alive	18.13	0
TCGA-A2-A259-01A	TCGA-A2-A259-01A	11.36	M0	1	Alive	52.43	0
TCGA-AO-A0J8-01A	TCGA-AO-A0J8-01A	11.36	M0	1	Alive	22.34	0
TCGA-AC-A2FG-01A	TCGA-AC-A2FG-01A	11.36	MX	3	Alive	60.87	0
TCGA-BH-A0AY-01A	TCGA-BH-A0AY-01A	11.36	M0	1	Alive	25.53	0
TCGA-A2-A0T7-01A	TCGA-A2-A0T7-01A	11.37	M0	1	Alive	20.73	0
TCGA-A2-A1FV-01A	TCGA-A2-A1FV-01A	11.37	M0	1	Alive	23.46	0
TCGA-AR-A1AX-01A	TCGA-AR-A1AX-01A	11.37	M0	1	Alive	86.37	0
TCGA-E2-A1B5-01A	TCGA-E2-A1B5-01A	11.37	M0	1	Alive	32.33	0
TCGA-LD-A66U-01A	TCGA-LD-A66U-01A	11.37	MX	3	Alive	21.22	0
TCGA-S3-AA12-01A	TCGA-S3-AA12-01A	11.37	MX	3	Alive	18.86	0
TCGA-PL-A8LV-01A	TCGA-PL-A8LV-01A	11.37	M0	1	Alive	-0.23	0
TCGA-S3-AA10-01A	TCGA-S3-AA10-01A	11.38	M0	1	Alive	19.25	0
TCGA-D8-A27R-01A	TCGA-D8-A27R-01A	11.4	M0	1	Alive	10.09	0
TCGA-GM-A2DF-01A	TCGA-GM-A2DF-01A	11.41	M0	1	Alive	70.8	0
TCGA-A2-A4RX-01A	TCGA-A2-A4RX-01A	11.42	M0	1	Alive	24.38	0
TCGA-A7-A6VX-01A	TCGA-A7-A6VX-01A	11.42	M0	1	Alive	10.41	0
TCGA-A8-A08F-01A	TCGA-A8-A08F-01A	11.42	M0	1	Alive	32.98	0
TCGA-A8-A08L-01A	TCGA-A8-A08L-01A	11.42	M0	1	Dead	9.99	1
TCGA-A7-A3IZ-01A	TCGA-A7-A3IZ-01A	11.43	M0	1	Alive	10.58	0
TCGA-LL-A440-01A	TCGA-LL-A440-01A	11.44	MX	3	Alive	24.93	0
TCGA-AR-A2LH-01A	TCGA-AR-A2LH-01A	11.43	M0	1	Dead	20.24	1
TCGA-B6-A400-01A	TCGA-B6-A400-01A	11.45	M0	1	Alive	7.06	0
TCGA-E2-A14P-01A	TCGA-E2-A14P-01A	11.45	M0	1	Alive	40.93	0
TCGA-B6-A0IN-01A	TCGA-B6-A0IN-01A	11.45	MX	3	Dead	84.53	1
TCGA-LD-A7W6-01A	TCGA-LD-A7W6-01A	11.45	M0	1	Alive	13.27	0
TCGA-BH-A0E6-01A	TCGA-BH-A0E6-01A	11.46	M0	1	Alive	9.63	0
TCGA-BH-A8G0-01A	TCGA-BH-A8G0-01A	11.46	M0	1	Alive	21.75	0
TCGA-AR-A2LM-01A	TCGA-AR-A2LM-01A	11.47	M0	1	Alive	63.57	0
TCGA-BH-A0RX-01A	TCGA-BH-A0RX-01A	11.47	M0	1	Alive	5.58	0
TCGA-D8-A1JC-01A	TCGA-D8-A1JC-01A	11.47	M0	1	Alive	15.77	0
TCGA-EW-A1PA-01A	TCGA-EW-A1PA-01A	11.47	M0	1	Alive	18.89	0
TCGA-GI-A2C9-01A	TCGA-GI-A2C9-01A	11.49	MX	3	Alive	109.79	0
TCGA-E2-A14X-01A	TCGA-E2-A14X-01A	11.49	M0	1	Alive	31.93	0
TCGA-BH-A1FC-01A	TCGA-BH-A1FC-01A	11.5	M0	1	Dead	114.06	1
TCGA-AO-A1KT-01A	TCGA-AO-A1KT-01A	11.51	M0	1	Alive	17.77	0
TCGA-D8-A27K-01A	TCGA-D8-A27K-01A	11.51	M0	1	Alive	48	0
TCGA-GM-A3NW-01A	TCGA-GM-A3NW-01A	11.52	M0	1	Alive	110.41	0
TCGA-D8-A1JI-01A	TCGA-D8-A1JI-01A	11.53	MX	3	Alive	18.96	0
TCGA-LL-A7T0-01A	TCGA-LL-A7T0-01A	11.52	M0	1	Alive	12.35	0
TCGA-AO-A0J9-01A	TCGA-AO-A0J9-01A	11.55	M0	1	Alive	52.99	0
TCGA-BH-A0BG-01A	TCGA-BH-A0BG-01A	11.56	M0	1	Alive	61.47	0
TCGA-E2-A14U-01A	TCGA-E2-A14U-01A	11.56	M0	1	Alive	43.3	0
TCGA-5T-A9QA-01A	TCGA-5T-A9QA-01A	11.57	MX	3	Alive	9.95	0
TCGA-AC-A3YI-01A	TCGA-AC-A3YI-01A	11.58	MX	3	Alive	23.23	0
TCGA-BH-A0B7-01A	TCGA-BH-A0B7-01A	11.57	M0	1	Alive	84.07	0
TCGA-BH-A1F0-01A	TCGA-BH-A1F0-01A	11.59	M0	1	Dead	25.79	1
TCGA-E9-A1N8-01A	TCGA-E9-A1N8-01A	11.59	M0	1	Alive	34.13	0
TCGA-B6-A0RH-01A	TCGA-B6-A0RH-01A	11.6	M0	1	Dead	212.09	1
TCGA-A7-A13H-01A	TCGA-A7-A13H-01A	11.6	MX	3	Alive	29.53	0
TCGA-Z7-A8R5-01A	TCGA-Z7-A8R5-01A	11.6	MX	3	Alive	107.98	0
TCGA-LL-A7SZ-01A	TCGA-LL-A7SZ-01A	11.62	MX	3	Alive	19.51	0
TCGA-B6-A0RV-01A	TCGA-B6-A0RV-01A	11.6	M0	1	Alive	169.38	0
TCGA-BH-A28Q-01A	TCGA-BH-A28Q-01A	11.64	M0	1	Alive	36.76	0
TCGA-D8-A145-01A	TCGA-D8-A145-01A	11.64	M0	1	Alive	13.47	0
TCGA-E2-A1B1-01A	TCGA-E2-A1B1-01A	11.64	M0	1	Alive	87.16	0
TCGA-BH-A8FZ-01A	TCGA-BH-A8FZ-01A	11.66	M0	1	Alive	18.86	0
TCGA-AO-A03R-01A	TCGA-AO-A03R-01A	11.67	M0	1	Alive	68.69	0
TCGA-LD-A7W5-01A	TCGA-LD-A7W5-01A		M0	1	Alive	7.1	0
TCGA-LD-A9QF-01A	TCGA-LD-A9QF-01A	11.67	M0	1	Alive	10.61	0
TCGA-A8-A07L-01A	TCGA-A8-A07L-01A	11.68	M0	1	Alive	32.03	0
TCGA-E9-A3HO-01A	TCGA-E9-A3HO-01A	11.68	M0	1	Alive	38.04	0
TCGA-AN-A0AJ-01A	TCGA-AN-A0AJ-01A	11.7	M0	1	Alive	9.95	0
TCGA-BH-A42U-01A	TCGA-BH-A42U-01A	11.7	M0	1	Alive	110.51	0
TCGA-S3-AA0Z-01A	TCGA-S3-AA0Z-01A	11.72	M0	1	Alive	20.66	0
TCGA-E9-A1R2-01A	TCGA-E9-A1R2-01A	11.72	MX	3	Alive	34.92	0
TCGA-AO-A03T-01A	TCGA-AO-A03T-01A	11.73	M0	1	Alive	69.78	0
TCGA-A7-A13E-01A	TCGA-A7-A13E-01A	11.73	MX	3	Dead	20.17	1
TCGA-A2-A04N-01A	TCGA-A2-A04N-01A	11.74	M0	1	Alive	143.04	0
TCGA-BH-A0HF-01A	TCGA-BH-A0HF-01A	11.76	M0	1	Alive	23.88	0
TCGA-BH-A0HQ-01A	TCGA-BH-A0HQ-01A	11.76	M0	1	Alive	36.83	0
TCGA-E9-A228-01A	TCGA-E9-A228-01A	11.76	M0	1	Alive	42.21	0
TCGA-BH-A1FD-01A	TCGA-BH-A1FD-01A	11.77	M0	1	Dead	33.15	1
TCGA-E9-A243-01A	TCGA-E9-A243-01A	11.77	M0	1	Alive	20.11	0
TCGA-OL-A6VQ-01A	TCGA-OL-A6VQ-01A	11.77	MX	3	Alive	19.71	0
TCGA-AR-A24P-01A	TCGA-AR-A24P-01A	11.78	M0	1	Alive	2.76	0
TCGA-BH-A0EI-01A	TCGA-BH-A0EI-01A	11.81	M0	1	Alive	63.27	0
TCGA-D8-A1JL-01A	TCGA-D8-A1JL-01A	11.81	M0	1	Alive	20.07	0
TCGA-A2-A0D1-01A	TCGA-A2-A0D1-01A	11.82	M0	1	Alive	34.53	0
TCGA-A7-A0DB-01A	TCGA-A7-A0DB-01A	11.83	M0	1	Alive	33.08	0
TCGA-AO-A1KQ-01A	TCGA-AO-A1KQ-01A	11.83	M0	1	Alive	61.83	0
TCGA-B6-A401-01A	TCGA-B6-A401-01A	11.83	M0	1	Alive	85.28	0
TCGA-AR-A2LN-01A	TCGA-AR-A2LN-01A	11.85	M0	1	Alive	38.14	0
TCGA-BH-A0HK-01A	TCGA-BH-A0HK-01A	11.85	M0	1	Alive	5.85	0
TCGA-C8-A1HO-01A	TCGA-C8-A1HO-01A	11.85	M0	1	Alive	12.32	0
TCGA-C8-A3M8-01A	TCGA-C8-A3M8-01A	11.85	M0	1	Alive	12.94	0
TCGA-XX-A899-01A	TCGA-XX-A899-01A	11.85	MX	3	Alive	15.34	0
TCGA-OL-A5RX-01A	TCGA-OL-A5RX-01A	11.86	MX	3	Alive	28.84	0
TCGA-AQ-A04J-01A	TCGA-AQ-A04J-01A	11.88	M0	1	Alive	26.91	0
TCGA-GM-A2DN-01A	TCGA-GM-A2DN-01A	11.88	M0	1	Alive	101.54	0
TCGA-A2-A0ES-01A	TCGA-A2-A0ES-01A	11.89	M0	1	Alive	71.94	0
TCGA-LL-A5YO-01A	TCGA-LL-A5YO-01A	11.89	MX	3	Alive	14.45	0
TCGA-A8-A08Z-01A	TCGA-A8-A08Z-01A	11.91	M0	1	Alive	39.98	0
TCGA-BH-A0B6-01A	TCGA-BH-A0B6-01A	11.92	M0	1	Alive	81.57	0
TCGA-BH-A203-01A	TCGA-BH-A203-01A	11.92	M0	1	Dead	38.57	1
TCGA-E9-A22A-01A	TCGA-E9-A22A-01A	11.92	M0	1	Alive	39.06	0
TCGA-EW-A1P6-01A	TCGA-EW-A1P6-01A	11.92	M0	1	Alive	18.46	0
TCGA-E2-A1LH-01A	TCGA-E2-A1LH-01A	11.93	M0	1	Alive	106.67	0
TCGA-PL-A8LY-01A	TCGA-PL-A8LY-01A	11.93	M0	1	Alive	0.26	0
TCGA-B6-A1KC-01B	TCGA-B6-A1KC-01B	11.94	M0	1	Alive	43.56	0
TCGA-BH-A0DL-01A	TCGA-BH-A0DL-01A	11.96	M0	1	Alive	78.22	0
TCGA-AO-A129-01A	TCGA-AO-A129-01A	11.97	M0	1	Alive	107.95	0
TCGA-BH-A0BS-11A	TCGA-BH-A0BS-11A	11.97	M0	1	Alive	85.81	0
TCGA-A2-A0CO-01A	TCGA-A2-A0CO-01A	11.98	M0	1	Dead	114.72	1
TCGA-AC-A2QJ-01A	TCGA-AC-A2QJ-01A	12.02	M0	1	Dead	14.65	1
TCGA-AO-A0JI-01A	TCGA-AO-A0JI-01A	12.04	M0	1	Alive	50.2	0
TCGA-BH-A209-01A	TCGA-BH-A209-01A	12.04	M0	1	Dead	130.06	1
TCGA-AO-A1KP-01A	TCGA-AO-A1KP-01A	12.06	M0	1	Alive	97.01	0
TCGA-BH-A0E2-01A	TCGA-BH-A0E2-01A	12.07	M0	1	Alive	14.29	0
TCGA-AO-A0J3-01A	TCGA-AO-A0J3-01A	12.08	M0	1	Alive	21.39	0
TCGA-A2-A3XT-01A	TCGA-A2-A3XT-01A	12.12	M0	1	Alive	91	0
TCGA-E2-A1LL-01A	TCGA-E2-A1LL-01A	12.09	MX	3	Alive	43	0
TCGA-LL-A441-01A	TCGA-LL-A441-01A	12.1	MX	3	Alive	32.72	0
TCGA-BH-A1ES-01A	TCGA-BH-A1ES-01A	12.13	M0	1	Dead	113.73	1
TCGA-AC-A3OD-01B	TCGA-AC-A3OD-01B	12.12	MX	3	Alive	14.82	0
TCGA-EW-A6SB-01A	TCGA-EW-A6SB-01A	12.13	M0	1	Alive	24.97	0
TCGA-GM-A2DB-01A	TCGA-GM-A2DB-01A	12.17	M0	1	Alive	79.04	0
TCGA-A8-A09C-01A	TCGA-A8-A09C-01A		MX	3	Alive	1.02	0
TCGA-E2-A1LK-01A	TCGA-E2-A1LK-01A	12.18	M0	1	Dead	8.74	1
TCGA-E9-A1RB-01A	TCGA-E9-A1RB-01A	12.19	M0	1	Dead	32.06	1
TCGA-E9-A295-01A	TCGA-E9-A295-01A	12.2	M0	1	Alive	12.32	0
TCGA-A7-A6VW-01A	TCGA-A7-A6VW-01A	12.21	M0	1	Alive	9.36	0
TCGA-BH-A0H5-01A	TCGA-BH-A0H5-01A	12.21	M0	1	Alive	53.22	0
TCGA-S3-A6ZG-01A	TCGA-S3-A6ZG-01A	12.21	M0	1	Alive	18.46	0
TCGA-B6-A0RT-01A	TCGA-B6-A0RT-01A	12.22	M0	1	Alive	89.39	0
TCGA-A1-A0SK-01A	TCGA-A1-A0SK-01A	12.23	M0	1	Dead	31.77	1
TCGA-AO-A0J7-01A	TCGA-AO-A0J7-01A	12.23	M0	1	Alive	20.3	0
TCGA-E2-A1BD-01A	TCGA-E2-A1BD-01A	12.25	M0	1	Alive	37.22	0
TCGA-A2-A04U-01A	TCGA-A2-A04U-01A	12.27	M0	1	Alive	87.19	0
TCGA-B6-A1KN-01A	TCGA-B6-A1KN-01A	12.27	M0	1	Alive	139.06	0
TCGA-A2-A0T5-01A	TCGA-A2-A0T5-01A	12.3	M0	1	Alive	17.44	0
TCGA-AC-A3EH-01A	TCGA-AC-A3EH-01A	12.31	M0	1	Dead	6.47	1
TCGA-E9-A1RA-01A	TCGA-E9-A1RA-01A	12.31	M0	1	Alive	44.97	0
TCGA-GM-A3XL-01A	TCGA-GM-A3XL-01A	12.32	M0	1	Alive	69.25	0
TCGA-3C-AALJ-01A	TCGA-3C-AALJ-01A	12.36	M0	1	Alive	48.42	0
TCGA-AR-A1AQ-01A	TCGA-AR-A1AQ-01A	12.36	M0	1	Alive	99.24	0
TCGA-A2-A04Q-01A	TCGA-A2-A04Q-01A	12.4	M0	1	Alive	78.35	0
TCGA-E9-A1N3-01A	TCGA-E9-A1N3-01A	12.42	M0	1	Alive	34.79	0
TCGA-A1-A0SG-01A	TCGA-A1-A0SG-01A	12.43	M0	1	Alive	14.26	0
TCGA-B6-A0WT-01A	TCGA-B6-A0WT-01A	12.43	M0	1	Alive	188.53	0
TCGA-AR-A0U3-01A	TCGA-AR-A0U3-01A	12.44	M0	1	Alive	134.03	0
TCGA-E9-A1RC-01A	TCGA-E9-A1RC-01A	12.48	M0	1	Alive	40.21	0
TCGA-B6-A0RL-01A	TCGA-B6-A0RL-01A	12.49	M0	1	Dead	81.11	1
TCGA-AC-A5EI-01A	TCGA-AC-A5EI-01A		MX	3	Alive	14.52	0
TCGA-E2-A9RU-01A	TCGA-E2-A9RU-01A	12.45	MX	3	Alive	17.67	0
TCGA-AC-A7VB-01A	TCGA-AC-A7VB-01A	12.47	MX	3	Alive	8.21	0
TCGA-A2-A0CR-01A	TCGA-A2-A0CR-01A	12.5	M0	1	Alive	107.85	0
TCGA-BH-A0E0-01A	TCGA-BH-A0E0-01A	12.5	M0	1	Alive	4.4	0
TCGA-OL-A5RY-01A	TCGA-OL-A5RY-01A	12.49	MX	3	Alive	24.7	0
TCGA-GM-A2DI-01A	TCGA-GM-A2DI-01A	12.5	M0	1	Alive	85.09	0
TCGA-A8-A082-01A	TCGA-A8-A082-01A	12.51	M0	1	Alive	18.04	0
TCGA-E2-A15R-01A	TCGA-E2-A15R-01A	12.52	M0	1	Alive	56.9	0
TCGA-AR-A251-01A	TCGA-AR-A251-01A	12.55	M0	1	Alive	99.54	0
TCGA-E9-A5FL-01A	TCGA-E9-A5FL-01A	12.57	M0	1	Alive	0.79	0
TCGA-AR-A1AW-01A	TCGA-AR-A1AW-01A	12.58	M0	1	Alive	86.47	0
TCGA-AC-A2BM-01A	TCGA-AC-A2BM-01A	12.55	MX	3	Alive	99.28	0
TCGA-E2-A105-01A	TCGA-E2-A105-01A	12.6	M0	1	Alive	42.97	0
TCGA-E2-A15F-01A	TCGA-E2-A15F-01A	12.61	M0	1	Alive	21.62	0
TCGA-BH-A0DI-01A	TCGA-BH-A0DI-01A	12.64	M0	1	Alive	29.96	0
TCGA-A2-A4RY-01A	TCGA-A2-A4RY-01A	12.66	M0	1	Alive	21.29	0
TCGA-BH-A0DZ-11A	TCGA-BH-A0DZ-11A	12.66	M0	1	Alive	16.26	0
TCGA-A7-A0DC-01A	TCGA-A7-A0DC-01A	12.69	M0	1	Alive	29.76	0
TCGA-AC-A6NO-01A	TCGA-AC-A6NO-01A	12.65	MX	3	Alive	1.68	0
TCGA-AR-A1AY-01A	TCGA-AR-A1AY-01A	12.7	M0	1	Alive	33.71	0
TCGA-A2-A0YK-01A	TCGA-A2-A0YK-01A	12.73	M0	1	Alive	19.32	0
TCGA-AR-A5QN-01A	TCGA-AR-A5QN-01A	12.73	M0	1	Alive	33.28	0
TCGA-BH-A0W5-01A	TCGA-BH-A0W5-01A	12.73	M0	1	Alive	42.31	0
TCGA-E2-A56Z-01A	TCGA-E2-A56Z-01A	12.74	M0	1	Alive	8.28	0
TCGA-BH-A0DP-01A	TCGA-BH-A0DP-01A	12.76	M0	1	Alive	15.64	0
TCGA-A8-A08H-01A	TCGA-A8-A08H-01A	12.78	M0	1	Alive	0	0
TCGA-BH-A0BQ-01A	TCGA-BH-A0BQ-01A	12.81	M0	1	Alive	74.08	0
TCGA-C8-A12V-01A	TCGA-C8-A12V-01A	12.83	M0	1	Alive	12.65	0
TCGA-LL-A5YN-01A	TCGA-LL-A5YN-01A	12.83	M0	1	Alive	14.68	0
TCGA-A8-A07O-01A	TCGA-A8-A07O-01A	12.85	M0	1	Alive	9.99	0
TCGA-BH-A0DS-01A	TCGA-BH-A0DS-01A	12.87	M0	1	Alive	2.56	0
TCGA-EW-A1IW-01A	TCGA-EW-A1IW-01A	12.78	MX	3	Alive	12.19	0
TCGA-E2-A15I-01A	TCGA-E2-A15I-01A	12.91	M0	1	Alive	55.58	0
TCGA-A2-A0EP-01A	TCGA-A2-A0EP-01A	12.96	M0	1	Alive	118.36	0
TCGA-C8-A12X-01A	TCGA-C8-A12X-01A	12.99	M0	1	Alive	12.65	0
TCGA-E9-A249-01A	TCGA-E9-A249-01A	13.07	M0	1	Alive	7.13	0
TCGA-A7-A0D9-01A	TCGA-A7-A0D9-01A	13.09	M0	1	Alive	37.42	0
TCGA-A2-A0CV-01A	TCGA-A2-A0CV-01A	13.1	M0	1	Alive	98.92	0
TCGA-OL-A66J-01A	TCGA-OL-A66J-01A	12.95	MX	3	Alive	65.57	0
TCGA-E9-A2JT-01A	TCGA-E9-A2JT-01A	13.1	M0	1	Alive	9.46	0
TCGA-E9-A1NI-01A	TCGA-E9-A1NI-01A	13.11	M0	1	Alive	9.86	0
TCGA-EW-A1P8-01A	TCGA-EW-A1P8-01A	13.12	M0	1	Dead	7.85	1
TCGA-AR-A1AJ-01A	TCGA-AR-A1AJ-01A	13.16	M0	1	Alive	100.92	0
TCGA-A2-A25F-01A	TCGA-A2-A25F-01A	13.19	M0	1	Alive	10.58	0
TCGA-A8-A07U-01A	TCGA-A8-A07U-01A	13.2	M0	1	Alive	24.97	0
TCGA-B6-A0I5-01A	TCGA-B6-A0I5-01A	13.22	M0	1	Alive	281.08	0
TCGA-C8-A27A-01A	TCGA-C8-A27A-01A	13.23	M0	1	Alive	24.54	0
TCGA-WT-AB41-01A	TCGA-WT-AB41-01A	13.13	MX	3	Alive	52.92	0
TCGA-A2-A04T-01A	TCGA-A2-A04T-01A	13.24	M0	1	Alive	73.78	0
TCGA-A7-A26F-01B	TCGA-A7-A26F-01B	13.24	M0	1	Alive	24.24	0
TCGA-A2-A3Y0-01A	TCGA-A2-A3Y0-01A	13.25	M0	1	Alive	50.79	0
TCGA-EW-A1P7-01A	TCGA-EW-A1P7-01A	13.29	M0	1	Alive	30.06	0
TCGA-B6-A40B-01A	TCGA-B6-A40B-01A	13.3	M0	1	Alive	103.55	0
TCGA-A2-A0CM-01A	TCGA-A2-A0CM-01A	13.31	M0	1	Dead	24.77	1
TCGA-A2-A0ST-01A	TCGA-A2-A0ST-01A	13.31	M0	1	Alive	99.11	0
TCGA-A8-A081-01A	TCGA-A8-A081-01A	13.4	M0	1	Alive	0	0
TCGA-EW-A1IY-01A	TCGA-EW-A1IY-01A	13.26	MX	3	Alive	8.48	0
TCGA-C8-A134-01A	TCGA-C8-A134-01A	13.4	M0	1	Alive	12.58	0
TCGA-B6-A0IJ-01A	TCGA-B6-A0IJ-01A	13.43	M0	1	Alive	233.44	0
TCGA-D8-A1Y3-01A	TCGA-D8-A1Y3-01A	13.3	MX	3	Alive	14.13	0
TCGA-E2-A1AZ-01A	TCGA-E2-A1AZ-01A	13.46	M0	1	Alive	76.51	0
TCGA-AO-A0J6-01A	TCGA-AO-A0J6-01A	13.47	M0	1	Alive	37.45	0
TCGA-BH-A0B5-01A	TCGA-BH-A0B5-01A	13.47	M0	1	Alive	70.17	0
TCGA-EW-A1PB-01A	TCGA-EW-A1PB-01A	13.39	MX	3	Alive	19.97	0
TCGA-E9-A3QA-01A	TCGA-E9-A3QA-01A	13.47	M0	1	Alive	30.16	0
TCGA-GM-A2DO-01A	TCGA-GM-A2DO-01A	13.48	M0	1	Alive	85.28	0
TCGA-A7-A4SD-01A	TCGA-A7-A4SD-01A	13.55	M0	1	Alive	14.49	0
TCGA-AC-A3QQ-01B	TCGA-AC-A3QQ-01B	13.45	MX	3	Alive	24.11	0
TCGA-E2-A570-01A	TCGA-E2-A570-01A	13.55	M0	1	Alive	30.58	0
TCGA-A2-A1G1-01A	TCGA-A2-A1G1-01A	13.62	M0	1	Alive	19.19	0
TCGA-BH-A0GY-01A	TCGA-BH-A0GY-01A	13.62	M0	1	Alive	30.32	0
TCGA-AR-A1AO-01A	TCGA-AR-A1AO-01A	13.69	M0	1	Alive	86.01	0
TCGA-E2-A15D-01A	TCGA-E2-A15D-01A	13.69	M0	1	Alive	17.28	0
TCGA-AC-A6IW-01A	TCGA-AC-A6IW-01A	13.54	MX	3	Alive	13.57	0
TCGA-AR-A5QQ-01A	TCGA-AR-A5QQ-01A	13.71	M0	1	Dead	10.58	1
TCGA-B6-A0RE-01A	TCGA-B6-A0RE-01A	13.72	M0	1	Alive	255.49	0
TCGA-E9-A54X-01A	TCGA-E9-A54X-01A	13.73	M0	1	Alive	23.88	0
TCGA-OL-A97C-01A	TCGA-OL-A97C-01A	13.73	M0	1	Alive	8.9	0
TCGA-E2-A15O-01A	TCGA-E2-A15O-01A	13.74	M0	1	Alive	50.76	0
TCGA-BH-A0W7-01A	TCGA-BH-A0W7-01A	13.77	M0	1	Alive	44.78	0
TCGA-E2-A154-01A	TCGA-E2-A154-01A	13.78	M0	1	Alive	19.42	0
TCGA-A2-A0EQ-01A	TCGA-A2-A0EQ-01A	13.79	M0	1	Alive	79.7	0
TCGA-BH-A1EY-01A	TCGA-BH-A1EY-01A	13.93	M0	1	Dead	17.67	1
TCGA-E9-A22G-01A	TCGA-E9-A22G-01A	13.93	M0	1	Alive	40.7	0
TCGA-E2-A158-01A	TCGA-E2-A158-01A	13.95	M0	1	Alive	14.78	0
TCGA-AO-A03N-01B	TCGA-AO-A03N-01B	14	M0	1	Alive	66.72	0
TCGA-A7-A26I-01B	TCGA-A7-A26I-01B	14.01	M0	1	Alive	21.71	0
TCGA-AO-A0JC-01A	TCGA-AO-A0JC-01A	14.08	M0	1	Alive	50.82	0
TCGA-C8-A12K-01A	TCGA-C8-A12K-01A	14.26	M0	1	Alive	0	0
TCGA-C8-A138-01A	TCGA-C8-A138-01A	14.26	M0	1	Alive	12.48	0
TCGA-B6-A0RO-01A	TCGA-B6-A0RO-01A	14.29	M0	1	Alive	161.93	0
TCGA-S3-A6ZF-01A	TCGA-S3-A6ZF-01A	14.37	M0	1	Alive	18.79	0
TCGA-A7-A13G-01B	TCGA-A7-A13G-01B	13.95	MX	3	Alive	23.59	0
TCGA-AO-A128-01A	TCGA-AO-A128-01A	14.48	M0	1	Alive	106.7	0
TCGA-D8-A27L-01A	TCGA-D8-A27L-01A	14.64	M0	1	Alive	16.39	0
TCGA-BH-A18T-01A	TCGA-BH-A18T-01A	14.73	M0	1	Dead	7.36	1
TCGA-D8-A1JM-01A	TCGA-D8-A1JM-01A	14.8	M0	1	Alive	19.38	0
TCGA-E2-A1B6-01A	TCGA-E2-A1B6-01A	14.83	M0	1	Alive	28.48	0
TCGA-AR-A1AI-01A	TCGA-AR-A1AI-01A	14.93	M0	1	Alive	108.28	0
TCGA-A1-A0SP-01A	TCGA-A1-A0SP-01A	15.03	M0	1	Alive	19.19	0
TCGA-B6-A408-01A	TCGA-B6-A408-01A	15.05	M0	1	Alive	68.07	0
TCGA-OL-A66H-01A	TCGA-OL-A66H-01A	8.459	MX	3	Alive		0
TCGA-B6-A0I2-01A	TCGA-B6-A0I2-01A	15.1	M0	1	Alive	143.27	0
TCGA-A2-A3XW-01A	TCGA-A2-A3XW-01A	15.2	M0	1	Alive	56.24	0
TCGA-C8-A133-01A	TCGA-C8-A133-01A	15.22	M0	1	Alive	0	0
TCGA-BH-A2L8-01A	TCGA-BH-A2L8-01A	15.24	M0	1	Alive	20.11	0
TCGA-BH-A0B9-01A	TCGA-BH-A0B9-01A	15.4	M0	1	Alive	51.64	0
TCGA-A2-A0YM-01A	TCGA-A2-A0YM-01A	15.48	M0	1	Alive	31.7	0
TCGA-AR-A0U4-01A	TCGA-AR-A0U4-01A	15.76	M0	1	Alive	107.13	0
TCGA-E2-A1II-01A	TCGA-E2-A1II-01A	16.83	M0	1	Alive	33.67	0
TCGA-UU-A93S-01A	TCGA-UU-A93S-01A	10.78	M1	2	Dead	3.81	1
TCGA-LL-A73Z-01A	TCGA-LL-A73Z-01A	11.06	M1	2	Dead	7.46	1
TCGA-A8-A08T-01A	TCGA-A8-A08T-01A	11.91	M1	2	Dead	111.99	1
TCGA-A2-A0CS-01A	TCGA-A2-A0CS-01A	12.3	M1	2	Dead	77.14	1
TCGA-A2-A0SV-01A	TCGA-A2-A0SV-01A	12.69	M1	2	Dead	27.1	1
TCGA-B6-A3ZX-01A	TCGA-B6-A3ZX-01A	12.69	M1	2	Dead	37.84	1
TCGA-5L-AAT1-01A	TCGA-5L-AAT1-01A	13.57	M1	2	Alive	48.32	0
TCGA-OL-A5D7-01A	TCGA-OL-A5D7-01A	15.73	MX	3	Alive	58.48	0
TCGA-B6-A0X1-01A	TCGA-B6-A0X1-01A	14.7	M1	2	Dead	244.91	1
TCGA-OL-A66I-01A	TCGA-OL-A66I-01A	15.97	MX	3	Alive	23.46	0
TCGA-AN-A0FJ-01A	TCGA-AN-A0FJ-01A	15.32	M1	2	Alive	7.95	0
TCGA-BH-A0B2-01A	TCGA-BH-A0B2-01A	12.8
Total 1283; out of which
179 samples are
duplicated;
Out of this duplication
6 samples - triplicated
173 samples -duplicated
6 x 2 =12
173 x 1 = 173
Total 185
1283-185=1098 (TCGA)
Duplicates Removed
Xena Star Values
Cbioportal-rest

## Sheet: Lnode w.out NX-Overall-03-29-19
sample	sample	Star (fkpm+uq+1)	Neoplasm Disease Lymph Node Stage American Joint Committee on Cancer Code	Node - N0=1; N1=2; N2=3; N3 = 4; NX =5	Patient's Vital Status	Overall Survival (Months)	Dead=1; Alive =0
TCGA-5L-AAT0-01A	TCGA-5L-AAT0-01A	10.17	N0	1	Alive	48.52	0
TCGA-5L-AAT1-01A	TCGA-5L-AAT1-01A	13.57	N0	1	Alive	48.32	0
TCGA-A1-A0SB-01A	TCGA-A1-A0SB-01A	10.83	N0	1	Alive	8.51	0
TCGA-A1-A0SD-01A	TCGA-A1-A0SD-01A	8.833	N0	1	Alive	14.36	0
TCGA-A1-A0SF-01A	TCGA-A1-A0SF-01A	11.2	N0	1	Alive	48.06	0
TCGA-A2-A0CO-01A	TCGA-A2-A0CO-01A	11.98	N0	1	Dead	114.72	1
TCGA-A2-A0CR-01A	TCGA-A2-A0CR-01A	12.5	N0	1	Alive	107.85	0
TCGA-A2-A3XV-01A	TCGA-A2-A3XV-01A	8.135	N0	1	Alive	32.72	0
TCGA-A2-A3XX-01A	TCGA-A2-A3XX-01A	8.593	N0	1	Dead	47.27	1
TCGA-A2-A3XZ-01A	TCGA-A2-A3XZ-01A	11.17	N0	1	Alive	50.33	0
TCGA-A2-A4RX-01A	TCGA-A2-A4RX-01A	11.42	N0	1	Alive	24.38	0
TCGA-A2-A4S0-01A	TCGA-A2-A4S0-01A	8.231	N0	1	Alive	23.19	0
TCGA-A2-A4S1-01A	TCGA-A2-A4S1-01A	7.962	N0	1	Alive	26.94	0
TCGA-A7-A0CD-01A	TCGA-A7-A0CD-01A	8.919	N0	1	Alive	38.27	0
TCGA-A7-A13G-01B	TCGA-A7-A13G-01B	13.95	N0	1	Alive	23.59	0
TCGA-A7-A26F-01B	TCGA-A7-A26F-01B	13.24	N0	1	Alive	24.24	0
TCGA-A7-A26I-01B	TCGA-A7-A26I-01B	14.01	N0	1	Alive	21.71	0
TCGA-A7-A26J-01A	TCGA-A7-A26J-01A	10.27	N0	1	Alive	20.6	0
TCGA-A7-A3IY-01A	TCGA-A7-A3IY-01A	9.594	N0	1	Alive	11.33	0
TCGA-A7-A3J0-01A	TCGA-A7-A3J0-01A	7.775	N0	1	Alive	10.28	0
TCGA-A7-A3J1-01A	TCGA-A7-A3J1-01A	10.58	N0	1	Alive	11.27	0
TCGA-A7-A3RF-01A	TCGA-A7-A3RF-01A	9.555	N0	1	Alive	13.4	0
TCGA-A7-A4SC-01A	TCGA-A7-A4SC-01A	10.6	N0	1	Alive	14.65	0
TCGA-A7-A4SD-01A	TCGA-A7-A4SD-01A	13.55	N0	1	Alive	14.49	0
TCGA-A7-A4SE-01A	TCGA-A7-A4SE-01A	8.902	N0	1	Alive	21.16	0
TCGA-A7-A4SF-01A	TCGA-A7-A4SF-01A	7.341	N0	1	Alive	17.9	0
TCGA-A7-A56D-01A	TCGA-A7-A56D-01A	8.763	N0	1	Alive	14.72	0
TCGA-A7-A5ZV-01A	TCGA-A7-A5ZV-01A	11	N0	1	Alive	12.09	0
TCGA-A7-A6VV-01A	TCGA-A7-A6VV-01A	10.02	N0	1	Alive	10.28	0
TCGA-A7-A6VW-01A	TCGA-A7-A6VW-01A	12.21	N0	1	Alive	9.36	0
TCGA-A7-A6VX-01A	TCGA-A7-A6VX-01A	11.42	N0	1	Alive	10.41	0
TCGA-A8-A06N-01A	TCGA-A8-A06N-01A	9.534	N0	1	Alive	0	0
TCGA-A8-A06O-01A	TCGA-A8-A06O-01A	10.66	N0	1	Alive	13.01	0
TCGA-A8-A06X-01A	TCGA-A8-A06X-01A	8.771	N0	1	Dead	30.98	1
TCGA-A8-A06Y-01A	TCGA-A8-A06Y-01A	6.892	N0	1	Alive	25.99	0
TCGA-A8-A06Z-01A	TCGA-A8-A06Z-01A	8.13	N0	1	Alive	1.02	0
TCGA-A8-A076-01A	TCGA-A8-A076-01A	10.8	N0	1	Alive	53.94	0
TCGA-A8-A07B-01A	TCGA-A8-A07B-01A	0	N0	1	Alive	42.97	0
TCGA-A8-A07C-01A	TCGA-A8-A07C-01A	9.551	N0	1	Alive	33.97	0
TCGA-A8-A07O-01A	TCGA-A8-A07O-01A	12.85	N0	1	Alive	9.99	0
TCGA-A8-A07S-01A	TCGA-A8-A07S-01A	8.155	N0	1	Alive	7.98	0
TCGA-A8-A07Z-01A	TCGA-A8-A07Z-01A	9.763	N0	1	Alive	45.04	0
TCGA-A8-A081-01A	TCGA-A8-A081-01A	13.4	N0	1	Alive	0	0
TCGA-A8-A083-01A	TCGA-A8-A083-01A	10.81	N0	1	Alive	0	0
TCGA-A8-A08A-01A	TCGA-A8-A08A-01A	7.664	N0	1	Alive	0.99	0
TCGA-A8-A08B-01A	TCGA-A8-A08B-01A	10.73	N0	1	Alive	37.98	0
TCGA-A8-A08C-01A	TCGA-A8-A08C-01A	9.377	N0	1	Alive	28.94	0
TCGA-A8-A08G-01A	TCGA-A8-A08G-01A	11.14	N0	1	Alive	19.94	0
TCGA-A8-A08H-01A	TCGA-A8-A08H-01A	12.78	N0	1	Alive	0	0
TCGA-A8-A08I-01A	TCGA-A8-A08I-01A	11.09	N0	1	Alive	11.99	0
TCGA-A8-A090-01A	TCGA-A8-A090-01A	9.727	N0	1	Alive	0	0
TCGA-A8-A091-01A	TCGA-A8-A091-01A	10.31	N0	1	Alive	32.98	0
TCGA-A8-A093-01A	TCGA-A8-A093-01A	10.2	N0	1	Alive	17.94	0
TCGA-A8-A094-01A	TCGA-A8-A094-01A	9.466	N0	1	Alive	0	0
TCGA-A8-A095-01A	TCGA-A8-A095-01A	11.07	N0	1	Alive	41.95	0
TCGA-A8-A096-01A	TCGA-A8-A096-01A	8.209	N0	1	Alive	0	0
TCGA-A8-A09C-01A	TCGA-A8-A09C-01A		N0	1	Alive	1.02	0
TCGA-A8-A09I-01A	TCGA-A8-A09I-01A	10.17	N0	1	Alive	45.04	0
TCGA-A8-A09T-01A	TCGA-A8-A09T-01A	0	N0	1	Alive	19.02	0
TCGA-A8-A09V-01A	TCGA-A8-A09V-01A	9.967	N0	1	Alive	15.01	0
TCGA-A8-A09Z-01A	TCGA-A8-A09Z-01A	9.348	N0	1	Alive	0	0
TCGA-A8-A0A1-01A	TCGA-A8-A0A1-01A	9.713	N0	1	Alive	11.99	0
TCGA-A8-A0A2-01A	TCGA-A8-A0A2-01A	10.27	N0	1	Alive	19.02	0
TCGA-A8-A0A4-01A	TCGA-A8-A0A4-01A	10.42	N0	1	Alive	13.01	0
TCGA-A8-A0A9-01A	TCGA-A8-A0A9-01A	7.896	N0	1	Alive	27	0
TCGA-A8-A0AB-01A	TCGA-A8-A0AB-01A	10.97	N0	1	Alive	17.02	0
TCGA-A8-A0AD-01A	TCGA-A8-A0AD-01A	6.971	N0	1	Alive	38.01	0
TCGA-AC-A2FB-01A	TCGA-AC-A2FB-01A	11.18	N0	1	Alive	40.54	0
TCGA-AC-A2QH-01B	TCGA-AC-A2QH-01B	10.85	N0	1	Alive	33.02	0
TCGA-AC-A2QJ-01A	TCGA-AC-A2QJ-01A	12.02	N0	1	Dead	14.65	1
TCGA-AC-A3TN-01A	TCGA-AC-A3TN-01A	9.719	N0	1	Alive	14.98	0
TCGA-AC-A3W5-01A	TCGA-AC-A3W5-01A	9.942	N0	1	Alive	16.56	0
TCGA-AC-A4ZE-01A	TCGA-AC-A4ZE-01A	9.859	N0	1	Alive	29.24	0
TCGA-AC-A5XS-01A	TCGA-AC-A5XS-01A	9.336	N0	1	Alive	19.32	0
TCGA-AC-A62X-01A	TCGA-AC-A62X-01A	9.725	N0	1	Alive	13.7	0
TCGA-AC-A7VC-01A	TCGA-AC-A7VC-01A	10.31	N0	1	Alive	0.03	0
TCGA-AN-A03X-01A	TCGA-AN-A03X-01A	0	N0	1	Alive	0.33	0
TCGA-AN-A03Y-01A	TCGA-AN-A03Y-01A	8.999	N0	1	Alive	0.33	0
TCGA-AN-A046-01A	TCGA-AN-A046-01A	10.16	N0	1	Alive	0.33	0
TCGA-AN-A049-01A	TCGA-AN-A049-01A	9.483	N0	1	Alive	0.62	0
TCGA-AN-A0AJ-01A	TCGA-AN-A0AJ-01A	11.7	N0	1	Alive	9.95	0
TCGA-AN-A0AK-01A	TCGA-AN-A0AK-01A	9.977	N0	1	Alive	7.36	0
TCGA-AN-A0AL-01A	TCGA-AN-A0AL-01A	9.633	N0	1	Alive	7.46	0
TCGA-AN-A0AM-01A	TCGA-AN-A0AM-01A	9.557	N0	1	Alive	0.16	0
TCGA-AN-A0AR-01A	TCGA-AN-A0AR-01A	7.632	N0	1	Alive	0.33	0
TCGA-AN-A0AT-01A	TCGA-AN-A0AT-01A	10.02	N0	1	Alive	0.33	0
TCGA-AN-A0FD-01A	TCGA-AN-A0FD-01A	9.636	N0	1	Alive	6.44	0
TCGA-AN-A0FF-01A	TCGA-AN-A0FF-01A	9.636	N0	1	Alive	5.65	0
TCGA-AN-A0FK-01A	TCGA-AN-A0FK-01A	7.733	N0	1	Alive	7	0
TCGA-AN-A0FL-01A	TCGA-AN-A0FL-01A	9.12	N0	1	Alive	7.59	0
TCGA-AN-A0FN-01A	TCGA-AN-A0FN-01A	9.84	N0	1	Alive	7.16	0
TCGA-AN-A0FS-01A	TCGA-AN-A0FS-01A	8.684	N0	1	Alive	6.9	0
TCGA-AN-A0FV-01A	TCGA-AN-A0FV-01A	9.707	N0	1	Alive	0.33	0
TCGA-AN-A0FX-01A	TCGA-AN-A0FX-01A	10.41	N0	1	Alive	0.33	0
TCGA-AN-A0FY-01A	TCGA-AN-A0FY-01A	8.758	N0	1	Alive	0.33	0
TCGA-AN-A0G0-01A	TCGA-AN-A0G0-01A	6.4	N0	1	Alive	0.53	0
TCGA-AN-A0XL-01A	TCGA-AN-A0XL-01A	9.948	N0	1	Alive	5.35	0
TCGA-AN-A0XU-01A	TCGA-AN-A0XU-01A	8.134	N0	1	Alive	0.33	0
TCGA-AO-A1KR-01A	TCGA-AO-A1KR-01A	9.611	N0	1	Alive	82.56	0
TCGA-AQ-A54N-01A	TCGA-AQ-A54N-01A	11	N0	1	Alive	2.56	0
TCGA-AQ-A54O-01A	TCGA-AQ-A54O-01A	9.396	N0	1	Alive	32.88	0
TCGA-AR-A0TP-01A	TCGA-AR-A0TP-01A	8.259	N0	1	Alive	140.44	0
TCGA-AR-A0TU-01A	TCGA-AR-A0TU-01A	10.56	N0	1	Alive	23.29	0
TCGA-AR-A0TV-01A	TCGA-AR-A0TV-01A	7.664	N0	1	Alive	75.16	0
TCGA-AR-A0TY-01A	TCGA-AR-A0TY-01A	9.806	N0	1	Dead	55.81	1
TCGA-AR-A0U4-01A	TCGA-AR-A0U4-01A	15.76	N0	1	Alive	107.13	0
TCGA-AR-A1AI-01A	TCGA-AR-A1AI-01A	14.93	N0	1	Alive	108.28	0
TCGA-AR-A1AJ-01A	TCGA-AR-A1AJ-01A	13.16	N0	1	Alive	100.92	0
TCGA-AR-A1AK-01A	TCGA-AR-A1AK-01A	10.18	N0	1	Alive	103.78	0
TCGA-AR-A1AN-01A	TCGA-AR-A1AN-01A	8.612	N0	1	Alive	95.93	0
TCGA-AR-A1AP-01A	TCGA-AR-A1AP-01A	11.21	N0	1	Alive	93.82	0
TCGA-AR-A1AQ-01A	TCGA-AR-A1AQ-01A	12.36	N0	1	Alive	99.24	0
TCGA-AR-A1AT-01A	TCGA-AR-A1AT-01A	10.69	N0	1	Dead	41.79	1
TCGA-AR-A1AW-01A	TCGA-AR-A1AW-01A	12.58	N0	1	Alive	86.47	0
TCGA-AR-A1AX-01A	TCGA-AR-A1AX-01A	11.37	N0	1	Alive	86.37	0
TCGA-AR-A1AY-01A	TCGA-AR-A1AY-01A	12.7	N0	1	Alive	33.71	0
TCGA-AR-A24H-01A	TCGA-AR-A24H-01A	9.88	N0	1	Alive	160.78	0
TCGA-AR-A24K-01A	TCGA-AR-A24K-01A	8.341	N0	1	Alive	50.85	0
TCGA-AR-A24N-01A	TCGA-AR-A24N-01A	11.28	N0	1	Alive	99.7	0
TCGA-AR-A24P-01A	TCGA-AR-A24P-01A	11.78	N0	1	Alive	2.76	0
TCGA-AR-A24Q-01A	TCGA-AR-A24Q-01A	7.924	N0	1	Alive	104.2	0
TCGA-AR-A24S-01A	TCGA-AR-A24S-01A	6.35	N0	1	Alive	97.77	0
TCGA-AR-A24X-01A	TCGA-AR-A24X-01A	8.132	N0	1	Alive	98.69	0
TCGA-AR-A24Z-01A	TCGA-AR-A24Z-01A	9.141	N0	1	Alive	98.59	0
TCGA-AR-A250-01A	TCGA-AR-A250-01A	9.409	N0	1	Alive	88.93	0
TCGA-AR-A252-01A	TCGA-AR-A252-01A	10.39	N0	1	Alive	93.23	0
TCGA-AR-A255-01A	TCGA-AR-A255-01A	10.58	N0	1	Alive	70.99	0
TCGA-AR-A256-01A	TCGA-AR-A256-01A	10.54	N0	1	Dead	93.76	1
TCGA-AR-A2LE-01A	TCGA-AR-A2LE-01A	7.068	N0	1	Alive	166.29	0
TCGA-AR-A2LL-01A	TCGA-AR-A2LL-01A	8.189	N0	1	Alive	66.1	0
TCGA-AR-A2LN-01A	TCGA-AR-A2LN-01A	11.85	N0	1	Alive	38.14	0
TCGA-AR-A2LQ-01A	TCGA-AR-A2LQ-01A	10.44	N0	1	Alive	40.51	0
TCGA-AR-A2LR-01A	TCGA-AR-A2LR-01A	10.34	N0	1	Alive	57.23	0
TCGA-AR-A5QM-01A	TCGA-AR-A5QM-01A	10.12	N0	1	Alive	73.29	0
TCGA-B6-A0I1-01A	TCGA-B6-A0I1-01A	8.84	N0	1	Dead	77.56	1
TCGA-B6-A1KI-01A	TCGA-B6-A1KI-01A	9.289	N0	1	Alive	73.46	0
TCGA-B6-A2IU-01A	TCGA-B6-A2IU-01A	9.985	N0	1	Alive	170.04	0
TCGA-BH-A0AU-01A	TCGA-BH-A0AU-01A	10.07	N0	1	Alive	62.88	0
TCGA-BH-A0AV-01A	TCGA-BH-A0AV-01A	9.556	N0	1	Alive	59.79	0
TCGA-BH-A0B0-01A	TCGA-BH-A0B0-01A	11.24	N0	1	Alive	81.37	0
TCGA-BH-A0B6-01A	TCGA-BH-A0B6-01A	11.92	N0	1	Alive	81.57	0
TCGA-BH-A0BG-01A	TCGA-BH-A0BG-01A	11.56	N0	1	Alive	61.47	0
TCGA-BH-A0BL-01A	TCGA-BH-A0BL-01A	10.63	N0	1	Alive	74.84	0
TCGA-BH-A0BO-01A	TCGA-BH-A0BO-01A	10.94	N0	1	Alive	72.17	0
TCGA-BH-A0BP-01A	TCGA-BH-A0BP-01A	10.3	N0	1	Dead	75.43	1
TCGA-BH-A0BQ-01A	TCGA-BH-A0BQ-01A	12.81	N0	1	Alive	74.08	0
TCGA-BH-A0BR-01A	TCGA-BH-A0BR-01A	9.711	N0	1	Alive	76.54	0
TCGA-BH-A0BW-01A	TCGA-BH-A0BW-01A	10.91	N0	1	Alive	77.89	0
TCGA-BH-A0C3-01A	TCGA-BH-A0C3-01A	10.43	N0	1	Alive	88.99	0
TCGA-BH-A0DE-01A	TCGA-BH-A0DE-01A	10.79	N0	1	Alive	77.92	0
TCGA-BH-A0DG-01A	TCGA-BH-A0DG-01A	10.75	N0	1	Alive	67.05	0
TCGA-BH-A0DL-01A	TCGA-BH-A0DL-01A	11.96	N0	1	Alive	78.22	0
TCGA-BH-A0DO-01B	TCGA-BH-A0DO-01B	9.941	N0	1	Alive	54.01	0
TCGA-BH-A0DX-01A	TCGA-BH-A0DX-01A	11.26	N0	1	Alive	70.83	0
TCGA-BH-A0H3-01A	TCGA-BH-A0H3-01A	11.33	N0	1	Alive	63.34	0
TCGA-BH-A0HY-01A	TCGA-BH-A0HY-01A	9.33	N0	1	Alive	50.76	0
TCGA-BH-A18F-01A	TCGA-BH-A18F-01A	10.38	N0	1	Alive	32.88	0
TCGA-BH-A18G-01A	TCGA-BH-A18G-01A	0	N0	1	Alive	4.89	0
TCGA-BH-A18H-01A	TCGA-BH-A18H-01A	9.982	N0	1	Alive	21.42	0
TCGA-BH-A18K-01A	TCGA-BH-A18K-01A	8.597	N0	1	Dead	90.77	1
TCGA-BH-A18P-01A	TCGA-BH-A18P-01A	10.01	N0	1	Dead	30.26	1
TCGA-BH-A18S-01A	TCGA-BH-A18S-01A	8.121	N0	1	Dead	66	1
TCGA-BH-A18T-01A	TCGA-BH-A18T-01A	14.73	N0	1	Dead	7.36	1
TCGA-BH-A1ET-01A	TCGA-BH-A1ET-01A	8.871	N0	1	Dead	82.79	1
TCGA-BH-A1EU-01A	TCGA-BH-A1EU-01A	10.6	N0	1	Dead	42.25	1
TCGA-BH-A1EY-01A	TCGA-BH-A1EY-01A	13.93	N0	1	Dead	17.67	1
TCGA-BH-A1FD-01A	TCGA-BH-A1FD-01A	11.77	N0	1	Dead	33.15	1
TCGA-BH-A1FN-01A	TCGA-BH-A1FN-01A	8.044	N0	1	Dead	72.01	1
TCGA-BH-A1FU-01A	TCGA-BH-A1FU-01A	10.36	N0	1	Dead	55.45	1
TCGA-BH-A201-01A	TCGA-BH-A201-01A	10.55	N0	1	Alive	28.12	0
TCGA-BH-A202-01A	TCGA-BH-A202-01A	9.864	N0	1	Alive	26.12	0
TCGA-BH-A209-01A	TCGA-BH-A209-01A	12.04	N0	1	Dead	130.06	1
TCGA-BH-A42U-01A	TCGA-BH-A42U-01A	11.7	N0	1	Alive	110.51	0
TCGA-BH-A5J0-01A	TCGA-BH-A5J0-01A	8.059	N0	1	Alive	23.49	0
TCGA-BH-A6R8-01A	TCGA-BH-A6R8-01A	8.172	N0	1	Alive	9.63	0
TCGA-BH-A6R9-01A	TCGA-BH-A6R9-01A	11.01	N0	1	Alive	5.26	0
TCGA-BH-A8FZ-01A	TCGA-BH-A8FZ-01A	11.66	N0	1	Alive	18.86	0
TCGA-C8-A12T-01A	TCGA-C8-A12T-01A	7.01	N0	1	Alive	0	0
TCGA-C8-A12V-01A	TCGA-C8-A12V-01A	12.83	N0	1	Alive	12.65	0
TCGA-C8-A134-01A	TCGA-C8-A134-01A	13.4	N0	1	Alive	12.58	0
TCGA-C8-A1HE-01A	TCGA-C8-A1HE-01A	8.999	N0	1	Alive	12.32	0
TCGA-C8-A1HF-01A	TCGA-C8-A1HF-01A	9.372	N0	1	Alive	10.91	0
TCGA-C8-A1HG-01A	TCGA-C8-A1HG-01A	10.89	N0	1	Alive	11.33	0
TCGA-C8-A1HJ-01A	TCGA-C8-A1HJ-01A	10.8	N0	1	Alive	0.16	0
TCGA-C8-A1HM-01A	TCGA-C8-A1HM-01A	11.23	N0	1	Alive	12.32	0
TCGA-C8-A1HN-01A	TCGA-C8-A1HN-01A	10.5	N0	1	Alive	12.94	0
TCGA-C8-A26Y-01A	TCGA-C8-A26Y-01A	10.97	N0	1	Alive	12.94	0
TCGA-C8-A26Z-01A	TCGA-C8-A26Z-01A	10.05	N0	1	Alive	15.44	0
TCGA-C8-A274-01A	TCGA-C8-A274-01A	8.231	N0	1	Alive	16.69	0
TCGA-C8-A27B-01A	TCGA-C8-A27B-01A	9.191	N0	1	Alive	14.42	0
TCGA-C8-A3M7-01A	TCGA-C8-A3M7-01A	10.27	N0	1	Dead	33.97	1
TCGA-C8-A3M8-01A	TCGA-C8-A3M8-01A	11.85	N0	1	Alive	12.94	0
TCGA-D8-A13Y-01A	TCGA-D8-A13Y-01A	8.547	N0	1	Alive	56.77	0
TCGA-D8-A142-01A	TCGA-D8-A142-01A	9.369	N0	1	Alive	13.96	0
TCGA-D8-A143-01A	TCGA-D8-A143-01A	9.338	N0	1	Alive	14.16	0
TCGA-D8-A146-01A	TCGA-D8-A146-01A	9.984	N0	1	Alive	21.12	0
TCGA-D8-A147-01A	TCGA-D8-A147-01A	9.773	N0	1	Alive	19.19	0
TCGA-D8-A1J9-01A	TCGA-D8-A1J9-01A	10.39	N0	1	Alive	17.48	0
TCGA-D8-A1JG-01B	TCGA-D8-A1JG-01B	9.142	N0	1	Alive	52.96	0
TCGA-D8-A1JH-01A	TCGA-D8-A1JH-01A	10.33	N0	1	Alive	13.99	0
TCGA-D8-A1JJ-01A	TCGA-D8-A1JJ-01A	7.948	N0	1	Alive	20.07	0
TCGA-D8-A1JK-01A	TCGA-D8-A1JK-01A	7.075	N0	1	Alive	20.11	0
TCGA-D8-A1JL-01A	TCGA-D8-A1JL-01A	11.81	N0	1	Alive	20.07	0
TCGA-D8-A1JP-01A	TCGA-D8-A1JP-01A	9.604	N0	1	Alive	20.99	0
TCGA-D8-A1JS-01A	TCGA-D8-A1JS-01A	8.958	N0	1	Alive	12.19	0
TCGA-D8-A1JT-01A	TCGA-D8-A1JT-01A	9.215	N0	1	Alive	13.3	0
TCGA-D8-A1JU-01A	TCGA-D8-A1JU-01A	8.403	N0	1	Alive	14.68	0
TCGA-D8-A1X7-01A	TCGA-D8-A1X7-01A	8.879	N0	1	Alive	16.72	0
TCGA-D8-A1XA-01A	TCGA-D8-A1XA-01A	10.27	N0	1	Alive	27.56	0
TCGA-D8-A1XF-01A	TCGA-D8-A1XF-01A	11.32	N0	1	Alive	15.21	0
TCGA-D8-A1XM-01A	TCGA-D8-A1XM-01A	9.928	N0	1	Alive	17.67	0
TCGA-D8-A1XQ-01A	TCGA-D8-A1XQ-01A	7.929	N0	1	Alive	16.39	0
TCGA-D8-A1XU-01A	TCGA-D8-A1XU-01A	9.832	N0	1	Alive	12.98	0
TCGA-D8-A1XV-01A	TCGA-D8-A1XV-01A	8.814	N0	1	Alive	15.14	0
TCGA-D8-A1XW-01A	TCGA-D8-A1XW-01A	7.335	N0	1	Alive	43	0
TCGA-D8-A1XY-01A	TCGA-D8-A1XY-01A	9.06	N0	1	Alive	16.52	0
TCGA-D8-A1Y2-01A	TCGA-D8-A1Y2-01A	10.9	N0	1	Alive	14.22	0
TCGA-D8-A27E-01A	TCGA-D8-A27E-01A	8.664	N0	1	Alive	17.41	0
TCGA-D8-A27F-01A	TCGA-D8-A27F-01A	9.184	N0	1	Alive	16.03	0
TCGA-D8-A27G-01A	TCGA-D8-A27G-01A	7.992	N0	1	Alive	13.44	0
TCGA-D8-A27H-01A	TCGA-D8-A27H-01A	9.689	N0	1	Alive	13.04	0
TCGA-D8-A27M-01A	TCGA-D8-A27M-01A	10.02	N0	1	Alive	13.47	0
TCGA-D8-A27P-01A	TCGA-D8-A27P-01A	9.521	N0	1	Alive	1.61	0
TCGA-D8-A27V-01A	TCGA-D8-A27V-01A	9.73	N0	1	Alive	12.52	0
TCGA-D8-A27W-01A	TCGA-D8-A27W-01A	7.099	N0	1	Alive	12.25	0
TCGA-D8-A4Z1-01A	TCGA-D8-A4Z1-01A	9.912	N0	1	Alive	21.65	0
TCGA-D8-A73U-01A	TCGA-D8-A73U-01A	8.981	N0	1	Alive	16.16	0
TCGA-D8-A73X-01A	TCGA-D8-A73X-01A	10.04	N0	1	Alive	25.2	0
TCGA-E2-A14R-01A	TCGA-E2-A14R-01A	10.03	N0	1	Alive	38.57	0
TCGA-E2-A14S-01A	TCGA-E2-A14S-01A		N0	1	Alive	33.15	0
TCGA-E2-A14T-01A	TCGA-E2-A14T-01A	10.81	N0	1	Alive	75.92	0
TCGA-E2-A14U-01A	TCGA-E2-A14U-01A	11.56	N0	1	Alive	43.3	0
TCGA-E2-A14W-01A	TCGA-E2-A14W-01A	9.086	N0	1	Alive	32	0
TCGA-E2-A14Y-01A	TCGA-E2-A14Y-01A	10.1	N0	1	Alive	69.28	0
TCGA-E2-A14Z-01A	TCGA-E2-A14Z-01A	9.948	N0	1	Dead	18.5	1
TCGA-E2-A150-01A	TCGA-E2-A150-01A	11.17	N0	1	Alive	63.57	0
TCGA-E2-A152-01A	TCGA-E2-A152-01A	6.811	N0	1	Alive	69.91	0
TCGA-E2-A154-01A	TCGA-E2-A154-01A	13.78	N0	1	Alive	19.42	0
TCGA-E2-A156-01A	TCGA-E2-A156-01A	8.718	N0	1	Alive	23.85	0
TCGA-E2-A159-01A	TCGA-E2-A159-01A	10.64	N0	1	Alive	25.03	0
TCGA-E2-A15C-01A	TCGA-E2-A15C-01A	11.14	N0	1	Alive	22.8	0
TCGA-E2-A15D-01A	TCGA-E2-A15D-01A	13.69	N0	1	Alive	17.28	0
TCGA-E2-A15F-01A	TCGA-E2-A15F-01A	12.61	N0	1	Alive	21.62	0
TCGA-E2-A15G-01A	TCGA-E2-A15G-01A	7.817	N0	1	Alive	18.2	0
TCGA-E2-A15I-01A	TCGA-E2-A15I-01A	12.91	N0	1	Alive	55.58	0
TCGA-E2-A15J-01A	TCGA-E2-A15J-01A	8.958	N0	1	Alive	53.88	0
TCGA-E2-A15L-01A	TCGA-E2-A15L-01A	8.047	N0	1	Alive	20.57	0
TCGA-E2-A15M-01A	TCGA-E2-A15M-01A	9.736	N0	1	Dead	11.04	1
TCGA-E2-A15P-01A	TCGA-E2-A15P-01A	10.98	N0	1	Alive	19.55	0
TCGA-E2-A15T-01A	TCGA-E2-A15T-01A	9.922	N0	1	Alive	51.35	0
TCGA-E2-A1B5-01A	TCGA-E2-A1B5-01A	11.37	N0	1	Alive	32.33	0
TCGA-E2-A1B6-01A	TCGA-E2-A1B6-01A	14.83	N0	1	Alive	28.48	0
TCGA-E2-A1BC-01A	TCGA-E2-A1BC-01A	9.771	N0	1	Alive	16.46	0
TCGA-E2-A1BD-01A	TCGA-E2-A1BD-01A	12.25	N0	1	Alive	37.22	0
TCGA-E2-A1IF-01A	TCGA-E2-A1IF-01A	10.43	N0	1	Alive	37.39	0
TCGA-E2-A1IH-01A	TCGA-E2-A1IH-01A	10.8	N0	1	Alive	33.71	0
TCGA-E2-A1II-01A	TCGA-E2-A1II-01A	16.83	N0	1	Alive	33.67	0
TCGA-E2-A1IJ-01A	TCGA-E2-A1IJ-01A	9.998	N0	1	Alive	28.42	0
TCGA-E2-A1IN-01A	TCGA-E2-A1IN-01A	9.527	N0	1	Alive	22.17	0
TCGA-E2-A1IO-01A	TCGA-E2-A1IO-01A	10.07	N0	1	Alive	60.94	0
TCGA-E2-A1LG-01A	TCGA-E2-A1LG-01A	9.013	N0	1	Alive	50.03	0
TCGA-E2-A1LH-01A	TCGA-E2-A1LH-01A	11.93	N0	1	Alive	106.67	0
TCGA-E2-A1LS-01A	TCGA-E2-A1LS-01A	10.15	N0	1	Alive	52.69	0
TCGA-E2-A573-01A	TCGA-E2-A573-01A	9.426	N0	1	Alive	34.89	0
TCGA-E2-A574-01A	TCGA-E2-A574-01A	10.67	N0	1	Alive	38.73	0
TCGA-E2-A576-01A	TCGA-E2-A576-01A	10.22	N0	1	Alive	34.26	0
TCGA-E9-A1N8-01A	TCGA-E9-A1N8-01A	11.59	N0	1	Alive	34.13	0
TCGA-E9-A1N9-01A	TCGA-E9-A1N9-01A	6.96	N0	1	Alive	36.17	0
TCGA-E9-A1NA-01A	TCGA-E9-A1NA-01A	9.76	N0	1	Alive	36.53	0
TCGA-E9-A1NF-01A	TCGA-E9-A1NF-01A	8.956	N0	1	Dead	35.22	1
TCGA-E9-A1NG-01A	TCGA-E9-A1NG-01A	7.391	N0	1	Dead	25.82	1
TCGA-E9-A1NI-01A	TCGA-E9-A1NI-01A	13.11	N0	1	Alive	9.86	0
TCGA-E9-A1QZ-01A	TCGA-E9-A1QZ-01A	11.08	N0	1	Alive	24.8	0
TCGA-E9-A1R4-01A	TCGA-E9-A1R4-01A	8.723	N0	1	Alive	6.11	0
TCGA-E9-A1R5-01A	TCGA-E9-A1R5-01A	8.052	N0	1	Alive	3.02	0
TCGA-E9-A1R6-01A	TCGA-E9-A1R6-01A	10.29	N0	1	Alive	11.14	0
TCGA-E9-A1R7-01A	TCGA-E9-A1R7-01A	10.06	N0	1	Alive	48.19	0
TCGA-E9-A1RA-01A	TCGA-E9-A1RA-01A	12.31	N0	1	Alive	44.97	0
TCGA-E9-A1RB-01A	TCGA-E9-A1RB-01A	12.19	N0	1	Dead	32.06	1
TCGA-E9-A1RD-01A	TCGA-E9-A1RD-01A	9.109	N0	1	Alive	1.12	0
TCGA-E9-A1RH-01A	TCGA-E9-A1RH-01A	8.502	N0	1	Alive	46.55	0
TCGA-E9-A229-01A	TCGA-E9-A229-01A	9.995	N0	1	Alive	37.71	0
TCGA-E9-A22A-01A	TCGA-E9-A22A-01A	11.92	N0	1	Alive	39.06	0
TCGA-E9-A22B-01A	TCGA-E9-A22B-01A	9.628	N0	1	Alive	38.34	0
TCGA-E9-A22D-01A	TCGA-E9-A22D-01A	10.73	N0	1	Alive	41	0
TCGA-E9-A22G-01A	TCGA-E9-A22G-01A	13.93	N0	1	Alive	40.7	0
TCGA-E9-A5FL-01A	TCGA-E9-A5FL-01A	12.57	N0	1	Alive	0.79	0
TCGA-E9-A5UO-01A	TCGA-E9-A5UO-01A	6.883	N0	1	Alive	25.79	0
TCGA-E9-A5UP-01A	TCGA-E9-A5UP-01A	9.465	N0	1	Alive	26.38	0
TCGA-EW-A1IY-01A	TCGA-EW-A1IY-01A	13.26	N0	1	Alive	8.48	0
TCGA-EW-A1J3-01A	TCGA-EW-A1J3-01A	10.27	N0	1	Alive	16.56	0
TCGA-EW-A1OW-01A	TCGA-EW-A1OW-01A	8.621	N0	1	Alive	22.8	0
TCGA-EW-A1OX-01A	TCGA-EW-A1OX-01A	7.955	N0	1	Alive	29.93	0
TCGA-EW-A1OY-01A	TCGA-EW-A1OY-01A	8.735	N0	1	Alive	29.83	0
TCGA-EW-A1P3-01A	TCGA-EW-A1P3-01A	9.239	N0	1	Alive	52.92	0
TCGA-EW-A1PF-01A	TCGA-EW-A1PF-01A	10.4	N0	1	Alive	14.42	0
TCGA-EW-A3E8-01B	TCGA-EW-A3E8-01B	10.42	N0	1	Alive	34	0
TCGA-EW-A423-01A	TCGA-EW-A423-01A	9.341	N0	1	Alive	17.51	0
TCGA-EW-A6SB-01A	TCGA-EW-A6SB-01A	12.13	N0	1	Alive	24.97	0
TCGA-EW-A6SC-01A	TCGA-EW-A6SC-01A	8.826	N0	1	Alive	31.27	0
TCGA-GI-A2C8-01A	TCGA-GI-A2C8-01A	9.938	N0	1	Alive	7.39	0
TCGA-GI-A2C9-01A	TCGA-GI-A2C9-01A	11.49	N0	1	Alive	109.79	0
TCGA-HN-A2NL-01A	TCGA-HN-A2NL-01A	10.65	N0	1	Alive	2.6	0
TCGA-JL-A3YX-01A	TCGA-JL-A3YX-01A	11.24	N0	1	Alive	11.56	0
TCGA-LD-A9QF-01A	TCGA-LD-A9QF-01A	11.67	N0	1	Alive	10.61	0
TCGA-LL-A441-01A	TCGA-LL-A441-01A	12.1	N0	1	Alive	32.72	0
TCGA-LL-A50Y-01A	TCGA-LL-A50Y-01A	9.6	N0	1	Alive	25.03	0
TCGA-LL-A5YO-01A	TCGA-LL-A5YO-01A	11.89	N0	1	Alive	14.45	0
TCGA-LL-A73Y-01A	TCGA-LL-A73Y-01A	11.16	N0	1	Alive	15.67	0
TCGA-OL-A5D6-01A	TCGA-OL-A5D6-01A	9.968	N0	1	Dead	36.27	1
TCGA-OL-A5D7-01A	TCGA-OL-A5D7-01A	15.73	N0	1	Alive	58.48	0
TCGA-OL-A5D8-01A	TCGA-OL-A5D8-01A	10.98	N0	1	Alive	31.96	0
TCGA-OL-A5DA-01A	TCGA-OL-A5DA-01A	10.41	N0	1	Alive	58.57	0
TCGA-OL-A5RX-01A	TCGA-OL-A5RX-01A	11.86	N0	1	Alive	28.84	0
TCGA-OL-A5RZ-01A	TCGA-OL-A5RZ-01A	10.71	N0	1	Alive	22.31	0
TCGA-OL-A66J-01A	TCGA-OL-A66J-01A	12.95	N0	1	Alive	65.57	0
TCGA-OL-A66K-01A	TCGA-OL-A66K-01A	8.387	N0	1	Dead	41.89	1
TCGA-OL-A66L-01A	TCGA-OL-A66L-01A	10.11	N0	1	Alive	42.74	0
TCGA-OL-A66P-01A	TCGA-OL-A66P-01A	10.54	N0	1	Alive	14.06	0
TCGA-OL-A6VO-01A	TCGA-OL-A6VO-01A	10.12	N0	1	Alive	28.19	0
TCGA-OL-A6VQ-01A	TCGA-OL-A6VQ-01A	11.77	N0	1	Alive	19.71	0
TCGA-OL-A6VR-01A	TCGA-OL-A6VR-01A	10.61	N0	1	Alive	40.08	0
TCGA-OL-A97C-01A	TCGA-OL-A97C-01A	13.73	N0	1	Alive	8.9	0
TCGA-PE-A5DD-01A	TCGA-PE-A5DD-01A	9.685	N0	1	Alive	64.16	0
TCGA-PE-A5DE-01A	TCGA-PE-A5DE-01A	9.28	N0	1	Alive	86.89	0
TCGA-PL-A8LV-01A	TCGA-PL-A8LV-01A	11.37	N0	1	Alive	-0.23	0
TCGA-PL-A8LY-01A	TCGA-PL-A8LY-01A	11.93	N0	1	Alive	0.26	0
TCGA-S3-A6ZF-01A	TCGA-S3-A6ZF-01A	14.37	N0	1	Alive	18.79	0
TCGA-S3-AA10-01A	TCGA-S3-AA10-01A	11.38	N0	1	Alive	19.25	0
TCGA-S3-AA11-01A	TCGA-S3-AA11-01A	10.54	N0	1	Alive	13.83	0
TCGA-UL-AAZ6-01A	TCGA-UL-AAZ6-01A	9.983	N0	1	Alive	17.02	0
TCGA-XX-A89A-01A	TCGA-XX-A89A-01A	9.987	N0	1	Alive	16.03	0
TCGA-Z7-A8R6-01A	TCGA-Z7-A8R6-01A	8.243	N0	1	Alive	106.96	0
TCGA-A1-A0SE-01A	TCGA-A1-A0SE-01A	9.095	N0 (i-)	1	Alive	43.4	0
TCGA-A1-A0SH-01A	TCGA-A1-A0SH-01A	9.275	N0 (i-)	1	Alive	47.21	0
TCGA-A1-A0SK-01A	TCGA-A1-A0SK-01A	12.23	N0 (i-)	1	Dead	31.77	1
TCGA-A1-A0SM-01A	TCGA-A1-A0SM-01A	8.455	N0 (i-)	1	Alive	7.95	0
TCGA-A1-A0SP-01A	TCGA-A1-A0SP-01A	15.03	N0 (i-)	1	Alive	19.19	0
TCGA-A2-A04N-01A	TCGA-A2-A04N-01A	11.74	N0 (i-)	1	Alive	143.04	0
TCGA-A2-A04Q-01A	TCGA-A2-A04Q-01A	12.4	N0 (i-)	1	Alive	78.35	0
TCGA-A2-A04R-01A	TCGA-A2-A04R-01A	0	N0 (i-)	1	Alive	121.85	0
TCGA-A2-A04T-01A	TCGA-A2-A04T-01A	13.24	N0 (i-)	1	Alive	73.78	0
TCGA-A2-A04V-01A	TCGA-A2-A04V-01A	10.52	N0 (i-)	1	Dead	63.07	1
TCGA-A2-A04X-01A	TCGA-A2-A04X-01A	10.18	N0 (i-)	1	Alive	55.39	0
TCGA-A2-A0CM-01A	TCGA-A2-A0CM-01A	13.31	N0 (i-)	1	Dead	24.77	1
TCGA-A2-A0CP-01A	TCGA-A2-A0CP-01A	10.12	N0 (i-)	1	Alive	92.41	0
TCGA-A2-A0CQ-01A	TCGA-A2-A0CQ-01A	11.2	N0 (i-)	1	Alive	88.53	0
TCGA-A2-A0CT-01A	TCGA-A2-A0CT-01A	9.49	N0 (i-)	1	Alive	75.2	0
TCGA-A2-A0CX-01A	TCGA-A2-A0CX-01A	10.14	N0 (i-)	1	Alive	56.77	0
TCGA-A2-A0CZ-01A	TCGA-A2-A0CZ-01A	11.35	N0 (i-)	1	Alive	53.09	0
TCGA-A2-A0D0-01A	TCGA-A2-A0D0-01A	7.938	N0 (i-)	1	Alive	67.28	0
TCGA-A2-A0D1-01A	TCGA-A2-A0D1-01A	11.82	N0 (i-)	1	Alive	34.53	0
TCGA-A2-A0D3-01A	TCGA-A2-A0D3-01A	10.9	N0 (i-)	1	Alive	61.53	0
TCGA-A2-A0EM-01A	TCGA-A2-A0EM-01A	9.645	N0 (i-)	1	Alive	101.64	0
TCGA-A2-A0EO-01A	TCGA-A2-A0EO-01A	9.808	N0 (i-)	1	Alive	80.22	0
TCGA-A2-A0EQ-01A	TCGA-A2-A0EQ-01A	13.79	N0 (i-)	1	Alive	79.7	0
TCGA-A2-A0ES-01A	TCGA-A2-A0ES-01A	11.89	N0 (i-)	1	Alive	71.94	0
TCGA-A2-A0EU-01A	TCGA-A2-A0EU-01A	10.74	N0 (i-)	1	Alive	34.26	0
TCGA-A2-A0EV-01A	TCGA-A2-A0EV-01A	8.916	N0 (i-)	1	Alive	31.8	0
TCGA-A2-A0SX-01A	TCGA-A2-A0SX-01A	10.22	N0 (i-)	1	Alive	50.39	0
TCGA-A2-A0T4-01A	TCGA-A2-A0T4-01A	9.086	N0 (i-)	1	Alive	20.5	0
TCGA-A2-A0T5-01A	TCGA-A2-A0T5-01A	12.3	N0 (i-)	1	Alive	17.44	0
TCGA-A2-A0T6-01A	TCGA-A2-A0T6-01A	10.63	N0 (i-)	1	Alive	18.89	0
TCGA-A2-A0YK-01A	TCGA-A2-A0YK-01A	12.73	N0 (i-)	1	Alive	19.32	0
TCGA-A2-A0YM-01A	TCGA-A2-A0YM-01A	15.48	N0 (i-)	1	Alive	31.7	0
TCGA-A2-A1FZ-01A	TCGA-A2-A1FZ-01A	6.812	N0 (i-)	1	Alive	22.44	0
TCGA-A2-A259-01A	TCGA-A2-A259-01A	11.36	N0 (i-)	1	Alive	52.43	0
TCGA-A2-A25A-01A	TCGA-A2-A25A-01A	10.87	N0 (i-)	1	Alive	107.62	0
TCGA-A2-A25F-01A	TCGA-A2-A25F-01A	13.19	N0 (i-)	1	Alive	10.58	0
TCGA-A7-A0CE-01A	TCGA-A7-A0CE-01A	11	N0 (i-)	1	Alive	35.28	0
TCGA-A7-A0CG-01A	TCGA-A7-A0CG-01A	10.32	N0 (i-)	1	Alive	34.26	0
TCGA-A7-A0CH-01A	TCGA-A7-A0CH-01A	6.915	N0 (i-)	1	Alive	35.45	0
TCGA-A7-A0CJ-01A	TCGA-A7-A0CJ-01A	10.73	N0 (i-)	1	Alive	30.58	0
TCGA-A7-A0D9-01A	TCGA-A7-A0D9-01A	13.09	N0 (i-)	1	Alive	37.42	0
TCGA-A7-A0DA-01A	TCGA-A7-A0DA-01A	9.125	N0 (i-)	1	Alive	35.64	0
TCGA-A7-A0DB-01A	TCGA-A7-A0DB-01A	11.83	N0 (i-)	1	Alive	33.08	0
TCGA-A7-A0DC-01A	TCGA-A7-A0DC-01A	12.69	N0 (i-)	1	Alive	29.76	0
TCGA-A7-A13D-01A	TCGA-A7-A13D-01A	9.432	N0 (i-)	1	Alive	31.7	0
TCGA-AC-A2B8-01A	TCGA-AC-A2B8-01A	9.053	N0 (i-)	1	Alive	22.24	0
TCGA-AC-A3QQ-01B	TCGA-AC-A3QQ-01B	13.45	N0 (i-)	1	Alive	24.11	0
TCGA-AC-A3YJ-01A	TCGA-AC-A3YJ-01A	8.131	N0 (i-)	1	Alive	24.77	0
TCGA-AC-A5XU-01A	TCGA-AC-A5XU-01A	9.597	N0 (i-)	1	Alive	14.95	0
TCGA-AC-A6IW-01A	TCGA-AC-A6IW-01A	13.54	N0 (i-)	1	Alive	13.57	0
TCGA-AC-A8OP-01A	TCGA-AC-A8OP-01A	10.83	N0 (i-)	1	Alive	20.17	0
TCGA-AC-A8OR-01A	TCGA-AC-A8OR-01A	8.204	N0 (i-)	1	Alive	1.31	0
TCGA-AC-A8OS-01A	TCGA-AC-A8OS-01A	11.2	N0 (i-)	1	Alive	2.3	0
TCGA-AO-A03M-01B	TCGA-AO-A03M-01B	10.88	N0 (i-)	1	Alive	61.3	0
TCGA-AO-A03O-01A	TCGA-AO-A03O-01A	9.306	N0 (i-)	1	Dead	81.57	1
TCGA-AO-A03U-01B	TCGA-AO-A03U-01B	8.436	N0 (i-)	1	Dead	58.9	1
TCGA-AO-A03V-01A	TCGA-AO-A03V-01A	9.517	N0 (i-)	1	Alive	44.38	0
TCGA-AO-A0J2-01A	TCGA-AO-A0J2-01A	9.516	N0 (i-)	1	Alive	32.75	0
TCGA-AO-A0J4-01A	TCGA-AO-A0J4-01A	11.06	N0 (i-)	1	Alive	52.14	0
TCGA-AO-A0J6-01A	TCGA-AO-A0J6-01A	13.47	N0 (i-)	1	Alive	37.45	0
TCGA-AO-A0JC-01A	TCGA-AO-A0JC-01A	14.08	N0 (i-)	1	Alive	50.82	0
TCGA-AO-A124-01A	TCGA-AO-A124-01A	10.49	N0 (i-)	1	Alive	115.18	0
TCGA-AO-A125-01A	TCGA-AO-A125-01A	8.302	N0 (i-)	1	Alive	113.53	0
TCGA-AO-A126-01A	TCGA-AO-A126-01A	0	N0 (i-)	1	Alive	108.64	0
TCGA-AO-A128-01A	TCGA-AO-A128-01A	14.48	N0 (i-)	1	Alive	106.7	0
TCGA-AO-A12B-01A	TCGA-AO-A12B-01A	6.966	N0 (i-)	1	Alive	98.19	0
TCGA-AO-A12F-01A	TCGA-AO-A12F-01A	9.113	N0 (i-)	1	Alive	60.51	0
TCGA-AO-A12H-01A	TCGA-AO-A12H-01A	8.51	N0 (i-)	1	Alive	40.54	0
TCGA-AO-A1KS-01A	TCGA-AO-A1KS-01A	10.13	N0 (i-)	1	Alive	11.5	0
TCGA-AQ-A04L-01B	TCGA-AQ-A04L-01B	10.79	N0 (i-)	1	Alive	129.99	0
TCGA-B6-A0I2-01A	TCGA-B6-A0I2-01A	15.1	N0 (i-)	1	Alive	143.27	0
TCGA-B6-A0IA-01A	TCGA-B6-A0IA-01A	8.861	N0 (i-)	1	Alive	275.66	0
TCGA-B6-A0IJ-01A	TCGA-B6-A0IJ-01A	13.43	N0 (i-)	1	Alive	233.44	0
TCGA-B6-A0IM-01A	TCGA-B6-A0IM-01A	10.38	N0 (i-)	1	Dead	127.23	1
TCGA-B6-A0IO-01A	TCGA-B6-A0IO-01A	9.307	N0 (i-)	1	Alive	165.64	0
TCGA-B6-A0IP-01A	TCGA-B6-A0IP-01A	8.243	N0 (i-)	1	Dead	128.98	1
TCGA-B6-A0RE-01A	TCGA-B6-A0RE-01A	13.72	N0 (i-)	1	Alive	255.49	0
TCGA-B6-A0RG-01A	TCGA-B6-A0RG-01A	10.19	N0 (i-)	1	Alive	68.4	0
TCGA-B6-A0RH-01A	TCGA-B6-A0RH-01A	11.6	N0 (i-)	1	Dead	212.09	1
TCGA-B6-A0RL-01A	TCGA-B6-A0RL-01A	12.49	N0 (i-)	1	Dead	81.11	1
TCGA-B6-A0RN-01A	TCGA-B6-A0RN-01A	10.04	N0 (i-)	1	Alive	263.07	0
TCGA-B6-A0RQ-01A	TCGA-B6-A0RQ-01A	10.5	N0 (i-)	1	Dead	140.18	1
TCGA-B6-A0RS-01A	TCGA-B6-A0RS-01A	8.463	N0 (i-)	1	Dead	100.62	1
TCGA-B6-A0RU-01A	TCGA-B6-A0RU-01A	8.974	N0 (i-)	1	Alive	282.69	0
TCGA-B6-A0X0-01A	TCGA-B6-A0X0-01A	7.479	N0 (i-)	1	Dead	129.6	1
TCGA-B6-A402-01A	TCGA-B6-A402-01A	8.345	N0 (i-)	1	Alive	74.93	0
TCGA-B6-A40B-01A	TCGA-B6-A40B-01A	13.3	N0 (i-)	1	Alive	103.55	0
TCGA-B6-A40C-01A	TCGA-B6-A40C-01A	9.035	N0 (i-)	1	Alive	71.09	0
TCGA-BH-A0AY-01A	TCGA-BH-A0AY-01A	11.36	N0 (i-)	1	Alive	25.53	0
TCGA-BH-A0B8-01A	TCGA-BH-A0B8-01A	9.039	N0 (i-)	1	Alive	51.54	0
TCGA-BH-A0B9-01A	TCGA-BH-A0B9-01A	15.4	N0 (i-)	1	Alive	51.64	0
TCGA-BH-A0DK-01A	TCGA-BH-A0DK-01A	11.27	N0 (i-)	1	Alive	13.9	0
TCGA-BH-A0DP-01A	TCGA-BH-A0DP-01A	12.76	N0 (i-)	1	Alive	15.64	0
TCGA-BH-A0E6-01A	TCGA-BH-A0E6-01A	11.46	N0 (i-)	1	Alive	9.63	0
TCGA-BH-A0EB-01A	TCGA-BH-A0EB-01A	9.095	N0 (i-)	1	Alive	24.47	0
TCGA-BH-A0EE-01A	TCGA-BH-A0EE-01A	10.15	N0 (i-)	1	Alive	30.98	0
TCGA-BH-A0H0-01A	TCGA-BH-A0H0-01A	8.241	N0 (i-)	1	Alive	15.14	0
TCGA-BH-A0H5-01A	TCGA-BH-A0H5-01A	12.21	N0 (i-)	1	Alive	53.22	0
TCGA-BH-A0H9-01A	TCGA-BH-A0H9-01A	9.577	N0 (i-)	1	Alive	40.97	0
TCGA-BH-A0HA-01A	TCGA-BH-A0HA-01A	10.9	N0 (i-)	1	Alive	52.92	0
TCGA-BH-A0HB-01A	TCGA-BH-A0HB-01A	10.9	N0 (i-)	1	Alive	26.48	0
TCGA-BH-A0HF-01A	TCGA-BH-A0HF-01A	11.76	N0 (i-)	1	Alive	23.88	0
TCGA-BH-A0HI-01A	TCGA-BH-A0HI-01A	9.467	N0 (i-)	1	Alive	20.37	0
TCGA-BH-A0HN-01A	TCGA-BH-A0HN-01A	9.186	N0 (i-)	1	Alive	16.95	0
TCGA-BH-A0HU-01A	TCGA-BH-A0HU-01A	6.555	N0 (i-)	1	Alive	12.88	0
TCGA-BH-A0HW-01A	TCGA-BH-A0HW-01A	10.9	N0 (i-)	1	Alive	51.28	0
TCGA-BH-A0RX-01A	TCGA-BH-A0RX-01A	11.47	N0 (i-)	1	Alive	5.58	0
TCGA-BH-A0W4-01A	TCGA-BH-A0W4-01A	10.7	N0 (i-)	1	Alive	24.93	0
TCGA-BH-A0W7-01A	TCGA-BH-A0W7-01A	13.77	N0 (i-)	1	Alive	44.78	0
TCGA-BH-A0WA-01A	TCGA-BH-A0WA-01A	8.157	N0 (i-)	1	Alive	23.03	0
TCGA-BH-A2L8-01A	TCGA-BH-A2L8-01A	15.24	N0 (i-)	1	Alive	20.11	0
TCGA-C8-A12L-01A	TCGA-C8-A12L-01A	8.371	N0 (i-)	1	Alive	11.93	0
TCGA-C8-A12M-01A	TCGA-C8-A12M-01A	0	N0 (i-)	1	Alive	11.76	0
TCGA-C8-A12N-01A	TCGA-C8-A12N-01A	10.56	N0 (i-)	1	Alive	11.76	0
TCGA-C8-A12O-01A	TCGA-C8-A12O-01A	10.48	N0 (i-)	1	Alive	12.65	0
TCGA-E2-A105-01A	TCGA-E2-A105-01A	12.6	N0 (i-)	1	Alive	42.97	0
TCGA-E2-A109-01A	TCGA-E2-A109-01A	9.716	N0 (i-)	1	Alive	46.55	0
TCGA-E2-A10A-01A	TCGA-E2-A10A-01A	10.02	N0 (i-)	1	Alive	40.37	0
TCGA-E2-A10F-01A	TCGA-E2-A10F-01A	9.782	N0 (i-)	1	Alive	28.84	0
TCGA-E9-A243-01A	TCGA-E9-A243-01A	11.77	N0 (i-)	1	Alive	20.11	0
TCGA-E9-A244-01A	TCGA-E9-A244-01A	9.336	N0 (i-)	1	Alive	0.69	0
TCGA-E9-A247-01A	TCGA-E9-A247-01A	9.473	N0 (i-)	1	Alive	38.96	0
TCGA-E9-A248-01A	TCGA-E9-A248-01A	9.23	N0 (i-)	1	Alive	1.94	0
TCGA-E9-A249-01A	TCGA-E9-A249-01A	13.07	N0 (i-)	1	Alive	7.13	0
TCGA-E9-A295-01A	TCGA-E9-A295-01A	12.2	N0 (i-)	1	Alive	12.32	0
TCGA-E9-A2JT-01A	TCGA-E9-A2JT-01A	13.1	N0 (i-)	1	Alive	9.46	0
TCGA-E9-A3HO-01A	TCGA-E9-A3HO-01A	11.68	N0 (i-)	1	Alive	38.04	0
TCGA-E9-A3QA-01A	TCGA-E9-A3QA-01A	13.47	N0 (i-)	1	Alive	30.16	0
TCGA-E9-A54X-01A	TCGA-E9-A54X-01A	13.73	N0 (i-)	1	Alive	23.88	0
TCGA-EW-A1J5-01A	TCGA-EW-A1J5-01A	10.9	N0 (i-)	1	Alive	15.67	0
TCGA-EW-A1J6-01A	TCGA-EW-A1J6-01A	10.52	N0 (i-)	1	Alive	28.75	0
TCGA-EW-A1OZ-01A	TCGA-EW-A1OZ-01A	9.784	N0 (i-)	1	Alive	40.37	0
TCGA-EW-A1P4-01A	TCGA-EW-A1P4-01A	10.65	N0 (i-)	1	Alive	29.8	0
TCGA-EW-A1P7-01A	TCGA-EW-A1P7-01A	13.29	N0 (i-)	1	Alive	30.06	0
TCGA-EW-A1PC-01B	TCGA-EW-A1PC-01B	10.72	N0 (i-)	1	Alive	6.14	0
TCGA-EW-A2FW-01A	TCGA-EW-A2FW-01A	8.719	N0 (i-)	1	Alive	22.08	0
TCGA-GM-A2D9-01A	TCGA-GM-A2D9-01A	10.46	N0 (i-)	1	Dead	59.53	1
TCGA-GM-A2DB-01A	TCGA-GM-A2DB-01A	12.17	N0 (i-)	1	Alive	79.04	0
TCGA-GM-A2DD-01A	TCGA-GM-A2DD-01A	10.63	N0 (i-)	1	Alive	74.97	0
TCGA-GM-A2DK-01A	TCGA-GM-A2DK-01A	9.592	N0 (i-)	1	Alive	86.89	0
TCGA-GM-A2DL-01A	TCGA-GM-A2DL-01A	8.673	N0 (i-)	1	Alive	115.6	0
TCGA-GM-A2DM-01A	TCGA-GM-A2DM-01A	9.593	N0 (i-)	1	Alive	105.98	0
TCGA-GM-A2DN-01A	TCGA-GM-A2DN-01A	11.88	N0 (i-)	1	Alive	101.54	0
TCGA-GM-A2DO-01A	TCGA-GM-A2DO-01A	13.48	N0 (i-)	1	Alive	85.28	0
TCGA-GM-A3NW-01A	TCGA-GM-A3NW-01A	11.52	N0 (i-)	1	Alive	110.41	0
TCGA-GM-A3XL-01A	TCGA-GM-A3XL-01A	12.32	N0 (i-)	1	Alive	69.25	0
TCGA-LL-A440-01A	TCGA-LL-A440-01A	11.44	N0 (i-)	1	Alive	24.93	0
TCGA-LL-A442-01A	TCGA-LL-A442-01A	8.236	N0 (i-)	1	Alive	29.2	0
TCGA-LL-A5YN-01A	TCGA-LL-A5YN-01A	12.83	N0 (i-)	1	Alive	14.68	0
TCGA-LL-A6FR-01A	TCGA-LL-A6FR-01A	9.888	N0 (i-)	1	Alive	16.06	0
TCGA-LL-A740-01A	TCGA-LL-A740-01A	9.638	N0 (i-)	1	Alive	14.49	0
TCGA-LL-A8F5-01A	TCGA-LL-A8F5-01A	9.23	N0 (i-)	1	Alive	19.58	0
TCGA-W8-A86G-01A	TCGA-W8-A86G-01A	9.99	N0 (i-)	1	Alive	11.4	0
TCGA-WT-AB44-01A	TCGA-WT-AB44-01A	9.503	N0 (i-)	1	Alive	29.01	0
TCGA-3C-AALK-01A	TCGA-3C-AALK-01A	10.43	N0 (i+)	1	Alive	47.57	0
TCGA-A2-A04U-01A	TCGA-A2-A04U-01A	12.27	N0 (i+)	1	Alive	87.19	0
TCGA-A2-A0CU-01A	TCGA-A2-A0CU-01A	11.14	N0 (i+)	1	Dead	5.19	1
TCGA-A2-A0D2-01A	TCGA-A2-A0D2-01A	11.16	N0 (i+)	1	Alive	33.74	0
TCGA-A2-A0EN-01A	TCGA-A2-A0EN-01A	11.18	N0 (i+)	1	Alive	134.3	0
TCGA-A2-A0EP-01A	TCGA-A2-A0EP-01A	12.96	N0 (i+)	1	Alive	118.36	0
TCGA-A2-A0EX-01A	TCGA-A2-A0EX-01A	9.285	N0 (i+)	1	Alive	24.7	0
TCGA-A2-A0SU-01A	TCGA-A2-A0SU-01A	9.532	N0 (i+)	1	Alive	54.6	0
TCGA-A2-A0T7-01A	TCGA-A2-A0T7-01A	11.37	N0 (i+)	1	Alive	20.73	0
TCGA-A2-A0YD-01A	TCGA-A2-A0YD-01A	9.279	N0 (i+)	1	Alive	25.26	0
TCGA-A2-A0YF-01A	TCGA-A2-A0YF-01A	10.87	N0 (i+)	1	Alive	50.43	0
TCGA-A2-A0YI-01A	TCGA-A2-A0YI-01A	9.797	N0 (i+)	1	Alive	49.44	0
TCGA-A2-A1FV-01A	TCGA-A2-A1FV-01A	11.37	N0 (i+)	1	Alive	23.46	0
TCGA-A7-A26G-01A	TCGA-A7-A26G-01A	8.492	N0 (i+)	1	Alive	23.72	0
TCGA-A7-A3IZ-01A	TCGA-A7-A3IZ-01A	11.43	N0 (i+)	1	Alive	10.58	0
TCGA-AO-A0J8-01A	TCGA-AO-A0J8-01A	11.36	N0 (i+)	1	Alive	22.34	0
TCGA-AO-A12A-01A	TCGA-AO-A12A-01A	11.3	N0 (i+)	1	Alive	102.23	0
TCGA-AO-A12E-01A	TCGA-AO-A12E-01A	9.388	N0 (i+)	1	Alive	70.37	0
TCGA-AO-A12G-01A	TCGA-AO-A12G-01A	6.854	N0 (i+)	1	Alive	53.84	0
TCGA-AO-A1KO-01A	TCGA-AO-A1KO-01A	10.95	N0 (i+)	1	Alive	20.43	0
TCGA-AQ-A04J-01A	TCGA-AQ-A04J-01A	11.88	N0 (i+)	1	Alive	26.91	0
TCGA-BH-A0HQ-01A	TCGA-BH-A0HQ-01A	11.76	N0 (i+)	1	Alive	36.83	0
TCGA-BH-A42T-01A	TCGA-BH-A42T-01A	9.052	N0 (i+)	1	Dead	10.51	1
TCGA-BH-A8FY-01A	TCGA-BH-A8FY-01A	9.895	N0 (i+)	1	Dead	9.69	1
TCGA-EW-A6SA-01A	TCGA-EW-A6SA-01A	10.72	N0 (i+)	1	Alive	16.75	0
TCGA-GM-A2DH-01A	TCGA-GM-A2DH-01A	11.08	N0 (i+)	1	Alive	72.04	0
TCGA-GM-A2DI-01A	TCGA-GM-A2DI-01A	12.5	N0 (i+)	1	Alive	85.09	0
TCGA-S3-AA14-01A	TCGA-S3-AA14-01A	10.45	N0 (i+)	1	Alive	17.38	0
TCGA-E2-A1IU-01A	TCGA-E2-A1IU-01A	10.39	N0 (mol+)	1	Alive	11.07	0
TCGA-A1-A0SN-01A	TCGA-A1-A0SN-01A	7.504	N1	2	Alive	39.29	0
TCGA-A1-A0SO-01A	TCGA-A1-A0SO-01A	8.607	N1	2	Alive	27.99	0
TCGA-A1-A0SQ-01A	TCGA-A1-A0SQ-01A	7.824	N1	2	Alive	18.2	0
TCGA-A2-A0CY-01A	TCGA-A2-A0CY-01A	9.423	N1	2	Alive	54.96	0
TCGA-A2-A0SY-01A	TCGA-A2-A0SY-01A	10.41	N1	2	Alive	44.25	0
TCGA-A2-A0T0-01A	TCGA-A2-A0T0-01A	6.558	N1	2	Alive	17.51	0
TCGA-A2-A1G1-01A	TCGA-A2-A1G1-01A	13.62	N1	2	Alive	19.19	0
TCGA-A2-A25B-01A	TCGA-A2-A25B-01A	7.571	N1	2	Alive	42.41	0
TCGA-A7-A13E-01A	TCGA-A7-A13E-01A	11.73	N1	2	Dead	20.17	1
TCGA-A7-A6VY-01A	TCGA-A7-A6VY-01A	8.9	N1	2	Alive	8.74	0
TCGA-A8-A07P-01A	TCGA-A8-A07P-01A	8.196	N1	2	Alive	10.97	0
TCGA-A8-A08S-01A	TCGA-A8-A08S-01A	9.45	N1	2	Alive	32.98	0
TCGA-A8-A097-01A	TCGA-A8-A097-01A	10.32	N1	2	Alive	11.99	0
TCGA-A8-A09D-01A	TCGA-A8-A09D-01A	9.365	N1	2	Alive	50	0
TCGA-A8-A09K-01A	TCGA-A8-A09K-01A	10.93	N1	2	Alive	29.96	0
TCGA-A8-A09R-01A	TCGA-A8-A09R-01A	8.295	N1	2	Alive	8.97	0
TCGA-AC-A23C-01A	TCGA-AC-A23C-01A	9.878	N1	2	Alive	19.22	0
TCGA-AC-A23E-01A	TCGA-AC-A23E-01A	9.2	N1	2	Alive	22.93	0
TCGA-AC-A23G-01A	TCGA-AC-A23G-01A	11.29	N1	2	Alive	73.85	0
TCGA-AC-A2FF-01A	TCGA-AC-A2FF-01A	10.11	N1	2	Alive	90.64	0
TCGA-AC-A2FO-01A	TCGA-AC-A2FO-01A	10.66	N1	2	Alive	74.08	0
TCGA-AC-A3W6-01A	TCGA-AC-A3W6-01A	9.836	N1	2	Alive	19.78	0
TCGA-AC-A62Y-01A	TCGA-AC-A62Y-01A	10.14	N1	2	Alive	17.41	0
TCGA-AC-A6IV-01A	TCGA-AC-A6IV-01A	9.716	N1	2	Alive	18.66	0
TCGA-AN-A04C-01A	TCGA-AN-A04C-01A	7.632	N1	2	Alive	1.77	0
TCGA-AN-A04D-01A	TCGA-AN-A04D-01A	9.507	N1	2	Alive	1.71	0
TCGA-AN-A0FT-01A	TCGA-AN-A0FT-01A	9.716	N1	2	Alive	7.03	0
TCGA-AO-A03P-01A	TCGA-AO-A03P-01A	0	N1	2	Dead	95.63	1
TCGA-AO-A0J7-01A	TCGA-AO-A0J7-01A	12.23	N1	2	Alive	20.3	0
TCGA-AO-A0JI-01A	TCGA-AO-A0JI-01A	12.04	N1	2	Alive	50.2	0
TCGA-AO-A0JM-01A	TCGA-AO-A0JM-01A	9.329	N1	2	Alive	71.75	0
TCGA-AO-A1KP-01A	TCGA-AO-A1KP-01A	12.06	N1	2	Alive	97.01	0
TCGA-AO-A1KQ-01A	TCGA-AO-A1KQ-01A	11.83	N1	2	Alive	61.83	0
TCGA-AO-A1KT-01A	TCGA-AO-A1KT-01A	11.51	N1	2	Alive	17.77	0
TCGA-AR-A0TQ-01A	TCGA-AR-A0TQ-01A	10.14	N1	2	Alive	98.26	0
TCGA-AR-A0TR-01A	TCGA-AR-A0TR-01A	8.862	N1	2	Dead	5.26	1
TCGA-AR-A0TS-01A	TCGA-AR-A0TS-01A	10.7	N1	2	Alive	84.03	0
TCGA-AR-A0TW-01A	TCGA-AR-A0TW-01A	8.624	N1	2	Alive	98.85	0
TCGA-AR-A0TX-01A	TCGA-AR-A0TX-01A	11.3	N1	2	Alive	64.78	0
TCGA-AR-A0U0-01A	TCGA-AR-A0U0-01A	9.38	N1	2	Alive	65.31	0
TCGA-AR-A0U1-01A	TCGA-AR-A0U1-01A		N1	2	Alive	133.11	0
TCGA-AR-A0U3-01A	TCGA-AR-A0U3-01A	12.44	N1	2	Alive	134.03	0
TCGA-AR-A1AH-01A	TCGA-AR-A1AH-01A	8.566	N1	2	Alive	125.07	0
TCGA-AR-A1AL-01A	TCGA-AR-A1AL-01A	11.24	N1	2	Alive	97.6	0
TCGA-AR-A1AM-01A	TCGA-AR-A1AM-01A	10.95	N1	2	Alive	98.26	0
TCGA-AR-A1AO-01A	TCGA-AR-A1AO-01A	13.69	N1	2	Alive	86.01	0
TCGA-AR-A1AS-01A	TCGA-AR-A1AS-01A	7.05	N1	2	Alive	37.78	0
TCGA-AR-A1AV-01A	TCGA-AR-A1AV-01A	8.342	N1	2	Alive	61.24	0
TCGA-AR-A24L-01A	TCGA-AR-A24L-01A	9.417	N1	2	Dead	94.15	1
TCGA-AR-A24U-01A	TCGA-AR-A24U-01A	10.32	N1	2	Alive	102.76	0
TCGA-AR-A24V-01A	TCGA-AR-A24V-01A	8.982	N1	2	Alive	105.22	0
TCGA-AR-A24W-01A	TCGA-AR-A24W-01A	9.796	N1	2	Alive	50.92	0
TCGA-AR-A2LJ-01A	TCGA-AR-A2LJ-01A	10.9	N1	2	Alive	86.47	0
TCGA-AR-A2LM-01A	TCGA-AR-A2LM-01A	11.47	N1	2	Alive	63.57	0
TCGA-AR-A2LO-01A	TCGA-AR-A2LO-01A	10.8	N1	2	Alive	39.36	0
TCGA-AR-A5QP-01A	TCGA-AR-A5QP-01A	11.31	N1	2	Alive	38.93	0
TCGA-AR-A5QQ-01A	TCGA-AR-A5QQ-01A	13.71	N1	2	Dead	10.58	1
TCGA-B6-A0I6-01A	TCGA-B6-A0I6-01A	8.967	N1	2	Dead	32.56	1
TCGA-B6-A0IK-01A	TCGA-B6-A0IK-01A	10.7	N1	2	Dead	18.76	1
TCGA-B6-A0RT-01A	TCGA-B6-A0RT-01A	12.22	N1	2	Alive	89.39	0
TCGA-B6-A0WT-01A	TCGA-B6-A0WT-01A	12.43	N1	2	Alive	188.53	0
TCGA-B6-A0X1-01A	TCGA-B6-A0X1-01A	14.7	N1	2	Dead	244.91	1
TCGA-B6-A1KC-01B	TCGA-B6-A1KC-01B	11.94	N1	2	Alive	43.56	0
TCGA-B6-A1KF-01A	TCGA-B6-A1KF-01A	7.097	N1	2	Alive	101.45	0
TCGA-B6-A1KN-01A	TCGA-B6-A1KN-01A	12.27	N1	2	Alive	139.06	0
TCGA-B6-A3ZX-01A	TCGA-B6-A3ZX-01A	12.69	N1	2	Dead	37.84	1
TCGA-BH-A0DQ-01A	TCGA-BH-A0DQ-01A	9.384	N1	2	Alive	3.22	0
TCGA-BH-A0E1-01A	TCGA-BH-A0E1-01A	9.416	N1	2	Alive	15.67	0
TCGA-BH-A0GY-01A	TCGA-BH-A0GY-01A	13.62	N1	2	Alive	30.32	0
TCGA-BH-A0HK-01A	TCGA-BH-A0HK-01A	11.85	N1	2	Alive	5.85	0
TCGA-BH-A18M-01A	TCGA-BH-A18M-01A	8.967	N1	2	Dead	72.5	1
TCGA-BH-A18R-01A	TCGA-BH-A18R-01A	8.667	N1	2	Dead	37.52	1
TCGA-BH-A1EO-01A	TCGA-BH-A1EO-01A	10.53	N1	2	Dead	91.92	1
TCGA-BH-A1FE-01A	TCGA-BH-A1FE-01A	10.75	N1	2	Dead	74.67	1
TCGA-C8-A12K-01A	TCGA-C8-A12K-01A	14.26	N1	2	Alive	0	0
TCGA-C8-A12P-01A	TCGA-C8-A12P-01A	0	N1	2	Alive	11.76	0
TCGA-C8-A12U-01A	TCGA-C8-A12U-01A	9.314	N1	2	Alive	12.65	0
TCGA-C8-A12W-01A	TCGA-C8-A12W-01A	10.53	N1	2	Alive	12.65	0
TCGA-C8-A12X-01A	TCGA-C8-A12X-01A	12.99	N1	2	Alive	12.65	0
TCGA-C8-A12Y-01A	TCGA-C8-A12Y-01A	7.923	N1	2	Alive	48.49	0
TCGA-C8-A12Z-01A	TCGA-C8-A12Z-01A	8.112	N1	2	Alive	12.55	0
TCGA-C8-A132-01A	TCGA-C8-A132-01A	11.16	N1	2	Alive	12.58	0
TCGA-C8-A133-01A	TCGA-C8-A133-01A	15.22	N1	2	Alive	0	0
TCGA-C8-A135-01A	TCGA-C8-A135-01A	0	N1	2	Alive	12.91	0
TCGA-C8-A137-01A	TCGA-C8-A137-01A	0	N1	2	Alive	12.45	0
TCGA-C8-A1HK-01A	TCGA-C8-A1HK-01A	9.159	N1	2	Alive	12.02	0
TCGA-C8-A1HL-01A	TCGA-C8-A1HL-01A	8.805	N1	2	Alive	10.41	0
TCGA-C8-A26W-01A	TCGA-C8-A26W-01A	10.71	N1	2	Alive	12.52	0
TCGA-C8-A26X-01A	TCGA-C8-A26X-01A	9.345	N1	2	Alive	12.35	0
TCGA-C8-A273-01A	TCGA-C8-A273-01A	10.77	N1	2	Alive	16.85	0
TCGA-C8-A275-01A	TCGA-C8-A275-01A	9.668	N1	2	Alive	0.03	0
TCGA-C8-A27A-01A	TCGA-C8-A27A-01A	13.23	N1	2	Alive	24.54	0
TCGA-C8-A8HQ-01A	TCGA-C8-A8HQ-01A	9.122	N1	2	Alive	12.48	0
TCGA-C8-A9FZ-01A	TCGA-C8-A9FZ-01A		N1	2	Alive	19.45	0
TCGA-D8-A141-01A	TCGA-D8-A141-01A	10.98	N1	2	Alive	20.57	0
TCGA-E2-A14N-01A	TCGA-E2-A14N-01A	10.35	N1	2	Alive	47.11	0
TCGA-E2-A14V-01A	TCGA-E2-A14V-01A	7.525	N1	2	Alive	34.23	0
TCGA-E2-A15S-01A	TCGA-E2-A15S-01A	10.52	N1	2	Alive	14.06	0
TCGA-E2-A1B1-01A	TCGA-E2-A1B1-01A	11.64	N1	2	Alive	87.16	0
TCGA-E2-A1IE-01A	TCGA-E2-A1IE-01A	11.09	N1	2	Alive	77.6	0
TCGA-E2-A1LB-01A	TCGA-E2-A1LB-01A	7.025	N1	2	Alive	75.76	0
TCGA-E2-A1LI-01A	TCGA-E2-A1LI-01A	10.43	N1	2	Alive	102.53	0
TCGA-E2-A2P6-01A	TCGA-E2-A2P6-01A	8.792	N1	2	Alive	34.53	0
TCGA-E9-A1N5-01A	TCGA-E9-A1N5-01A	10.65	N1	2	Alive	36.79	0
TCGA-E9-A1N6-01A	TCGA-E9-A1N6-01A	10.73	N1	2	Dead	22.27	1
TCGA-E9-A1NC-01A	TCGA-E9-A1NC-01A	10.52	N1	2	Alive	39.52	0
TCGA-E9-A1ND-01A	TCGA-E9-A1ND-01A	9.685	N1	2	Alive	41.59	0
TCGA-E9-A1NE-01A	TCGA-E9-A1NE-01A	10.04	N1	2	Alive	35.74	0
TCGA-E9-A1NH-01A	TCGA-E9-A1NH-01A	9.731	N1	2	Alive	18.92	0
TCGA-E9-A1R0-01A	TCGA-E9-A1R0-01A	10.53	N1	2	Alive	28.25	0
TCGA-E9-A227-01A	TCGA-E9-A227-01A	11.01	N1	2	Alive	32.03	0
TCGA-E9-A228-01A	TCGA-E9-A228-01A	11.76	N1	2	Alive	42.21	0
TCGA-E9-A22H-01A	TCGA-E9-A22H-01A	10.1	N1	2	Alive	40.47	0
TCGA-E9-A245-01A	TCGA-E9-A245-01A	11.14	N1	2	Dead		1
TCGA-E9-A24A-01A	TCGA-E9-A24A-01A	8.363	N1	2	Alive	24.54	0
TCGA-E9-A2JS-01A	TCGA-E9-A2JS-01A	11.34	N1	2	Dead	29.7	1
TCGA-E9-A3X8-01A	TCGA-E9-A3X8-01A	10.01	N1	2	Alive	30.42	0
TCGA-EW-A424-01A	TCGA-EW-A424-01A	10.15	N1	2	Alive	23.49	0
TCGA-EW-A6S9-01A	TCGA-EW-A6S9-01A	10.14	N1	2	Alive	15.21	0
TCGA-HN-A2OB-01A	TCGA-HN-A2OB-01A	9.918	N1	2	Dead	62.42	1
TCGA-JL-A3YW-01A	TCGA-JL-A3YW-01A	10.09	N1	2	Alive	11.83	0
TCGA-MS-A51U-01A	TCGA-MS-A51U-01A	10.7	N1	2	Alive	22.37	0
TCGA-OL-A5RU-01A	TCGA-OL-A5RU-01A	11.32	N1	2	Alive	40.05	0
TCGA-OL-A5RW-01A	TCGA-OL-A5RW-01A	10.34	N1	2	Alive	36.33	0
TCGA-OL-A5RY-01A	TCGA-OL-A5RY-01A	12.49	N1	2	Alive	24.7	0
TCGA-S3-A6ZG-01A	TCGA-S3-A6ZG-01A	12.21	N1	2	Alive	18.46	0
TCGA-3C-AALI-01A	TCGA-3C-AALI-01A	11.04	N1a	2	Alive	131.57	0
TCGA-3C-AALJ-01A	TCGA-3C-AALJ-01A	12.36	N1a	2	Alive	48.42	0
TCGA-A1-A0SG-01A	TCGA-A1-A0SG-01A	12.43	N1a	2	Alive	14.26	0
TCGA-A1-A0SI-01A	TCGA-A1-A0SI-01A	9.799	N1a	2	Alive	20.86	0
TCGA-A1-A0SJ-01A	TCGA-A1-A0SJ-01A	9.006	N1a	2	Alive	13.67	0
TCGA-A2-A0CV-01A	TCGA-A2-A0CV-01A	13.1	N1a	2	Alive	98.92	0
TCGA-A2-A0CW-01A	TCGA-A2-A0CW-01A	9.143	N1a	2	Alive	107.85	0
TCGA-A2-A0D4-01A	TCGA-A2-A0D4-01A	9.003	N1a	2	Alive	25.2	0
TCGA-A2-A0EY-01A	TCGA-A2-A0EY-01A	11.26	N1a	2	Alive	63.24	0
TCGA-A2-A0ST-01A	TCGA-A2-A0ST-01A	13.31	N1a	2	Alive	99.11	0
TCGA-A2-A0YE-01A	TCGA-A2-A0YE-01A	7.487	N1a	2	Alive	18.2	0
TCGA-A2-A1G0-01A	TCGA-A2-A1G0-01A	10.46	N1a	2	Alive	20.24	0
TCGA-A2-A1G4-01A	TCGA-A2-A1G4-01A	10.95	N1a	2	Alive	19.55	0
TCGA-A2-A25C-01A	TCGA-A2-A25C-01A	8.451	N1a	2	Alive	17.18	0
TCGA-A2-A3KC-01A	TCGA-A2-A3KC-01A	7.598	N1a	2	Alive	36.2	0
TCGA-A2-A3XT-01A	TCGA-A2-A3XT-01A	12.12	N1a	2	Alive	91	0
TCGA-A2-A3XW-01A	TCGA-A2-A3XW-01A	15.2	N1a	2	Alive	56.24	0
TCGA-A2-A3XY-01A	TCGA-A2-A3XY-01A	10.91	N1a	2	Dead	35.91	1
TCGA-A2-A3Y0-01A	TCGA-A2-A3Y0-01A	13.25	N1a	2	Alive	50.79	0
TCGA-A2-A4S3-01A	TCGA-A2-A4S3-01A	10.03	N1a	2	Alive	21.88	0
TCGA-A7-A13F-01A	TCGA-A7-A13F-01A	10.28	N1a	2	Alive	25.13	0
TCGA-A7-A13H-01A	TCGA-A7-A13H-01A	11.6	N1a	2	Alive	29.53	0
TCGA-A7-A26E-01A	TCGA-A7-A26E-01A	10.48	N1a	2	Alive	31.34	0
TCGA-A7-A26H-01A	TCGA-A7-A26H-01A	9.796	N1a	2	Alive	23.78	0
TCGA-A7-A4SA-01A	TCGA-A7-A4SA-01A	11.13	N1a	2	Alive	14.91	0
TCGA-A7-A5ZW-01A	TCGA-A7-A5ZW-01A	10.99	N1a	2	Alive	10.71	0
TCGA-A8-A06R-01A	TCGA-A8-A06R-01A	0	N1a	2	Alive	17.97	0
TCGA-A8-A06T-01A	TCGA-A8-A06T-01A	10.27	N1a	2	Alive	53.02	0
TCGA-A8-A06U-01A	TCGA-A8-A06U-01A	9.584	N1a	2	Dead	29.01	1
TCGA-A8-A075-01A	TCGA-A8-A075-01A	8.989	N1a	2	Alive	17.02	0
TCGA-A8-A07F-01A	TCGA-A8-A07F-01A	8.535	N1a	2	Alive	18.96	0
TCGA-A8-A07G-01A	TCGA-A8-A07G-01A	10.43	N1a	2	Alive	18.96	0
TCGA-A8-A07J-01A	TCGA-A8-A07J-01A	8.025	N1a	2	Alive	11.99	0
TCGA-A8-A07L-01A	TCGA-A8-A07L-01A	11.68	N1a	2	Alive	32.03	0
TCGA-A8-A082-01A	TCGA-A8-A082-01A	12.51	N1a	2	Alive	18.04	0
TCGA-A8-A084-01A	TCGA-A8-A084-01A	10.56	N1a	2	Alive	15.05	0
TCGA-A8-A085-01A	TCGA-A8-A085-01A	8.34	N1a	2	Alive	36.93	0
TCGA-A8-A086-01A	TCGA-A8-A086-01A	11.21	N1a	2	Alive	13.01	0
TCGA-A8-A08R-01A	TCGA-A8-A08R-01A	10.18	N1a	2	Alive	0.99	0
TCGA-A8-A08T-01A	TCGA-A8-A08T-01A	11.91	N1a	2	Dead	111.99	1
TCGA-A8-A09B-01A	TCGA-A8-A09B-01A	8.553	N1a	2	Alive	11.99	0
TCGA-A8-A09E-01A	TCGA-A8-A09E-01A	7.785	N1a	2	Alive	49.01	0
TCGA-A8-A0A7-01A	TCGA-A8-A0A7-01A	10.55	N1a	2	Alive	0.99	0
TCGA-AC-A2BM-01A	TCGA-AC-A2BM-01A	12.55	N1a	2	Alive	99.28	0
TCGA-AC-A2FG-01A	TCGA-AC-A2FG-01A	11.36	N1a	2	Alive	60.87	0
TCGA-AC-A2QI-01A	TCGA-AC-A2QI-01A	10.47	N1a	2	Alive	19.32	0
TCGA-AC-A3HN-01A	TCGA-AC-A3HN-01A	9.614	N1a	2	Alive	16.29	0
TCGA-AC-A3W7-01A	TCGA-AC-A3W7-01A	10.01	N1a	2	Alive	15.47	0
TCGA-AC-A62V-01A	TCGA-AC-A62V-01A	7.021	N1a	2	Dead	11.43	1
TCGA-AC-A6NO-01A	TCGA-AC-A6NO-01A	12.65	N1a	2	Alive	1.68	0
TCGA-AC-A7VB-01A	TCGA-AC-A7VB-01A	12.47	N1a	2	Alive	8.21	0
TCGA-AC-A8OQ-01A	TCGA-AC-A8OQ-01A	10.98	N1a	2	Alive	1.12	0
TCGA-AN-A041-01A	TCGA-AN-A041-01A	8.099	N1a	2	Alive	0.23	0
TCGA-AO-A03N-01B	TCGA-AO-A03N-01B	14	N1a	2	Alive	66.72	0
TCGA-AO-A03R-01A	TCGA-AO-A03R-01A	11.67	N1a	2	Alive	68.69	0
TCGA-AO-A03T-01A	TCGA-AO-A03T-01A	11.73	N1a	2	Alive	69.78	0
TCGA-AO-A0J5-01A	TCGA-AO-A0J5-01A	6.286	N1a	2	Dead	26.02	1
TCGA-AO-A0JB-01A	TCGA-AO-A0JB-01A	10.62	N1a	2	Alive	50.66	0
TCGA-AO-A0JD-01A	TCGA-AO-A0JD-01A	10.41	N1a	2	Alive	71.94	0
TCGA-AO-A0JF-01A	TCGA-AO-A0JF-01A	9.034	N1a	2	Alive	65.05	0
TCGA-AO-A0JJ-01A	TCGA-AO-A0JJ-01A	10.64	N1a	2	Alive	61.99	0
TCGA-AO-A129-01A	TCGA-AO-A129-01A	11.97	N1a	2	Alive	107.95	0
TCGA-AO-A12C-01A	TCGA-AO-A12C-01A	9.192	N1a	2	Alive	77.92	0
TCGA-AO-A12D-01A	TCGA-AO-A12D-01A	9.851	N1a	2	Alive	82.62	0
TCGA-B6-A0RO-01A	TCGA-B6-A0RO-01A	14.29	N1a	2	Alive	161.93	0
TCGA-B6-A401-01A	TCGA-B6-A401-01A	11.83	N1a	2	Alive	85.28	0
TCGA-BH-A0AW-01A	TCGA-BH-A0AW-01A	9.645	N1a	2	Alive	20.43	0
TCGA-BH-A0AZ-01A	TCGA-BH-A0AZ-01A	9.66	N1a	2	Alive	63.04	0
TCGA-BH-A0B1-01A	TCGA-BH-A0B1-01A	10.26	N1a	2	Alive	37.71	0
TCGA-BH-A0B3-01A	TCGA-BH-A0B3-01A	10.22	N1a	2	Alive	39.52	0
TCGA-BH-A0B7-01A	TCGA-BH-A0B7-01A	11.57	N1a	2	Alive	84.07	0
TCGA-BH-A0BD-01A	TCGA-BH-A0BD-01A	10.28	N1a	2	Alive	18.2	0
TCGA-BH-A0BJ-01A	TCGA-BH-A0BJ-01A	8.668	N1a	2	Alive	21.68	0
TCGA-BH-A0BM-01A	TCGA-BH-A0BM-01A	9.039	N1a	2	Alive	61.63	0
TCGA-BH-A0BV-01A	TCGA-BH-A0BV-01A	7.787	N1a	2	Alive	49.9	0
TCGA-BH-A0BZ-01A	TCGA-BH-A0BZ-01A	8.741	N1a	2	Alive	74.08	0
TCGA-BH-A0C0-01A	TCGA-BH-A0C0-01A	11.27	N1a	2	Alive	41.72	0
TCGA-BH-A0DD-01A	TCGA-BH-A0DD-01A	8.917	N1a	2	Alive	81.67	0
TCGA-BH-A0DH-01A	TCGA-BH-A0DH-01A	8.358	N1a	2	Alive	37.98	0
TCGA-BH-A0DI-01A	TCGA-BH-A0DI-01A	12.64	N1a	2	Alive	29.96	0
TCGA-BH-A0DT-01A	TCGA-BH-A0DT-01A	11.11	N1a	2	Alive	78.94	0
TCGA-BH-A0DZ-11A	TCGA-BH-A0DZ-11A	12.66	N1a	2	Alive	16.26	0
TCGA-BH-A0E7-01A	TCGA-BH-A0E7-01A	7.341	N1a	2	Alive	44.78	0
TCGA-BH-A0E9-01B	TCGA-BH-A0E9-01B	10.44	N1a	2	Alive	81.77	0
TCGA-BH-A0EA-01A	TCGA-BH-A0EA-01A	10.59	N1a	2	Dead	32.56	1
TCGA-BH-A0EI-01A	TCGA-BH-A0EI-01A	11.81	N1a	2	Alive	63.27	0
TCGA-BH-A0GZ-01A	TCGA-BH-A0GZ-01A	10.73	N1a	2	Alive	10.78	0
TCGA-BH-A0HL-01A	TCGA-BH-A0HL-01A	0	N1a	2	Alive	2.37	0
TCGA-BH-A0HO-01A	TCGA-BH-A0HO-01A	7.91	N1a	2	Alive	2.5	0
TCGA-BH-A0HX-01A	TCGA-BH-A0HX-01A	10.17	N1a	2	Alive	27.23	0
TCGA-BH-A0W3-01A	TCGA-BH-A0W3-01A	10.95	N1a	2	Alive	23.92	0
TCGA-BH-A0W5-01A	TCGA-BH-A0W5-01A	12.73	N1a	2	Alive	42.31	0
TCGA-BH-A18I-01A	TCGA-BH-A18I-01A	12.64	N1a	2	Alive	35.91	0
TCGA-BH-A1ES-01A	TCGA-BH-A1ES-01A	12.13	N1a	2	Dead	113.73	1
TCGA-BH-A1F5-01A	TCGA-BH-A1F5-01A	10.19	N1a	2	Dead	89.09	1
TCGA-BH-A1FR-01A	TCGA-BH-A1FR-01A	10.09	N1a	2	Dead	53.94	1
TCGA-BH-A28Q-01A	TCGA-BH-A28Q-01A	11.64	N1a	2	Alive	36.76	0
TCGA-BH-A5IZ-01A	TCGA-BH-A5IZ-01A	11.72	N1a	2	Alive	18.63	0
TCGA-BH-A8G0-01A	TCGA-BH-A8G0-01A	11.46	N1a	2	Alive	21.75	0
TCGA-BH-AB28-01A	TCGA-BH-AB28-01A	10.26	N1a	2	Alive	9.43	0
TCGA-D8-A140-01A	TCGA-D8-A140-01A	8.346	N1a	2	Alive	13.24	0
TCGA-D8-A145-01A	TCGA-D8-A145-01A	11.64	N1a	2	Alive	13.47	0
TCGA-D8-A1J8-01A	TCGA-D8-A1J8-01A	9.388	N1a	2	Alive	14.16	0
TCGA-D8-A1JB-01A	TCGA-D8-A1JB-01A	10.6	N1a	2	Alive	55.45	0
TCGA-D8-A1JD-01A	TCGA-D8-A1JD-01A	7.661	N1a	2	Alive	18.13	0
TCGA-D8-A1JE-01A	TCGA-D8-A1JE-01A	7.337	N1a	2	Alive	18.89	0
TCGA-D8-A1JI-01A	TCGA-D8-A1JI-01A	11.53	N1a	2	Alive	18.96	0
TCGA-D8-A1JM-01A	TCGA-D8-A1JM-01A	14.8	N1a	2	Alive	19.38	0
TCGA-D8-A1X9-01A	TCGA-D8-A1X9-01A	9.119	N1a	2	Alive	23.88	0
TCGA-D8-A1XB-01A	TCGA-D8-A1XB-01A	11.35	N1a	2	Alive	18.13	0
TCGA-D8-A1XC-01A	TCGA-D8-A1XC-01A	7.004	N1a	2	Dead	12.39	1
TCGA-D8-A1XG-01A	TCGA-D8-A1XG-01A	10.19	N1a	2	Alive	14.72	0
TCGA-D8-A1XJ-01A	TCGA-D8-A1XJ-01A	8.447	N1a	2	Alive	21.81	0
TCGA-D8-A1XK-01A	TCGA-D8-A1XK-01A	10.96	N1a	2	Alive	14.49	0
TCGA-D8-A1XL-01A	TCGA-D8-A1XL-01A	9.782	N1a	2	Alive	19.91	0
TCGA-D8-A1XO-01A	TCGA-D8-A1XO-01A	8.565	N1a	2	Alive	55.26	0
TCGA-D8-A1XR-01A	TCGA-D8-A1XR-01A	0	N1a	2	Alive	15.83	0
TCGA-D8-A1XT-01A	TCGA-D8-A1XT-01A	8.981	N1a	2	Alive	16.62	0
TCGA-D8-A1Y1-01A	TCGA-D8-A1Y1-01A	10.18	N1a	2	Dead	9.92	1
TCGA-D8-A27K-01A	TCGA-D8-A27K-01A	11.51	N1a	2	Alive	48	0
TCGA-D8-A73W-01A	TCGA-D8-A73W-01A	9.675	N1a	2	Dead	12.65	1
TCGA-E2-A10B-01A	TCGA-E2-A10B-01A	10.06	N1a	2	Alive	37.48	0
TCGA-E2-A10C-01A	TCGA-E2-A10C-01A	11.11	N1a	2	Alive	40.08	0
TCGA-E2-A10E-01A	TCGA-E2-A10E-01A	7.987	N1a	2	Alive	28.42	0
TCGA-E2-A14O-01A	TCGA-E2-A14O-01A	10.21	N1a	2	Alive	44.65	0
TCGA-E2-A153-01A	TCGA-E2-A153-01A	10.46	N1a	2	Alive	23.23	0
TCGA-E2-A155-01A	TCGA-E2-A155-01A	7.914	N1a	2	Alive	21.02	0
TCGA-E2-A15E-01A	TCGA-E2-A15E-01A	9.086	N1a	2	Alive	20.7	0
TCGA-E2-A15K-01A	TCGA-E2-A15K-01A	8.316	N1a	2	Alive	9.03	0
TCGA-E2-A15R-01A	TCGA-E2-A15R-01A	12.52	N1a	2	Alive	56.9	0
TCGA-E2-A1AZ-01A	TCGA-E2-A1AZ-01A	13.46	N1a	2	Alive	76.51	0
TCGA-E2-A1IL-01A	TCGA-E2-A1IL-01A	9.564	N1a	2	Alive	3.88	0
TCGA-E2-A1L8-01A	TCGA-E2-A1L8-01A	8.801	N1a	2	Alive	73.59	0
TCGA-E2-A1LA-01A	TCGA-E2-A1LA-01A	8.945	N1a	2	Alive	24.57	0
TCGA-E2-A56Z-01A	TCGA-E2-A56Z-01A	12.74	N1a	2	Alive	8.28	0
TCGA-EW-A1IW-01A	TCGA-EW-A1IW-01A	12.78	N1a	2	Alive	12.19	0
TCGA-EW-A1IX-01A	TCGA-EW-A1IX-01A	10.94	N1a	2	Alive	39.68	0
TCGA-EW-A1J1-01A	TCGA-EW-A1J1-01A	9.887	N1a	2	Alive	18.89	0
TCGA-EW-A1P5-01A	TCGA-EW-A1P5-01A	8.736	N1a	2	Alive	23.09	0
TCGA-EW-A1P6-01A	TCGA-EW-A1P6-01A	11.92	N1a	2	Alive	18.46	0
TCGA-EW-A1PA-01A	TCGA-EW-A1PA-01A	11.47	N1a	2	Alive	18.89	0
TCGA-EW-A1PB-01A	TCGA-EW-A1PB-01A	13.39	N1a	2	Alive	19.97	0
TCGA-EW-A1PD-01A	TCGA-EW-A1PD-01A	9.692	N1a	2	Alive	13.93	0
TCGA-EW-A1PE-01A	TCGA-EW-A1PE-01A	9.402	N1a	2	Alive	10.51	0
TCGA-EW-A1PG-01A	TCGA-EW-A1PG-01A	8.836	N1a	2	Alive	34.53	0
TCGA-EW-A1PH-01A	TCGA-EW-A1PH-01A	11.33	N1a	2	Alive	19.94	0
TCGA-EW-A3U0-01A	TCGA-EW-A3U0-01A	10.16	N1a	2	Alive	17.48	0
TCGA-EW-A6SD-01A	TCGA-EW-A6SD-01A	10.12	N1a	2	Alive	33.18	0
TCGA-GM-A2DC-01A	TCGA-GM-A2DC-01A	10.75	N1a	2	Alive	83.28	0
TCGA-GM-A2DF-01A	TCGA-GM-A2DF-01A	11.41	N1a	2	Alive	70.8	0
TCGA-GM-A3NY-01A	TCGA-GM-A3NY-01A	11.01	N1a	2	Alive	38.17	0
TCGA-GM-A3XG-01A	TCGA-GM-A3XG-01A	10.5	N1a	2	Alive	43.69	0
TCGA-GM-A5PV-01A	TCGA-GM-A5PV-01A	10.81	N1a	2	Alive	13.53	0
TCGA-LD-A7W6-01A	TCGA-LD-A7W6-01A	11.45	N1a	2	Alive	13.27	0
TCGA-LL-A5YL-01A	TCGA-LL-A5YL-01A	10.14	N1a	2	Alive	17.05	0
TCGA-LL-A5YP-01A	TCGA-LL-A5YP-01A	9.779	N1a	2	Alive	14.78	0
TCGA-LL-A7SZ-01A	TCGA-LL-A7SZ-01A	11.62	N1a	2	Alive	19.51	0
TCGA-LL-A7T0-01A	TCGA-LL-A7T0-01A	11.52	N1a	2	Alive	12.35	0
TCGA-LQ-A4E4-01A	TCGA-LQ-A4E4-01A	9.089	N1a	2	Alive	27.89	0
TCGA-OK-A5Q2-01A	TCGA-OK-A5Q2-01A	10.84	N1a	2	Alive	2.1	0
TCGA-OL-A5S0-01A	TCGA-OL-A5S0-01A	10.8	N1a	2	Alive	20.37	0
TCGA-OL-A66O-01A	TCGA-OL-A66O-01A	10.34	N1a	2	Alive	17.35	0
TCGA-PL-A8LX-01A	TCGA-PL-A8LX-01A	8.646	N1a	2	Alive	0.16	0
TCGA-S3-AA0Z-01A	TCGA-S3-AA0Z-01A	11.72	N1a	2	Alive	20.66	0
TCGA-S3-AA12-01A	TCGA-S3-AA12-01A	11.37	N1a	2	Alive	18.86	0
TCGA-S3-AA15-01A	TCGA-S3-AA15-01A	13.32	N1a	2	Alive	17.25	0
TCGA-Z7-A8R5-01A	TCGA-Z7-A8R5-01A	11.6	N1a	2	Alive	107.98	0
TCGA-AO-A0J3-01A	TCGA-AO-A0J3-01A	12.08	N1b	2	Alive	21.39	0
TCGA-B6-A0I5-01A	TCGA-B6-A0I5-01A	13.22	N1b	2	Alive	281.08	0
TCGA-B6-A0IE-01A	TCGA-B6-A0IE-01A	8.913	N1b	2	Dead	65.47	1
TCGA-B6-A0IG-01A	TCGA-B6-A0IG-01A	10.68	N1b	2	Dead	146.39	1
TCGA-B6-A0IH-01A	TCGA-B6-A0IH-01A	10.27	N1b	2	Dead	112.29	1
TCGA-B6-A0IQ-01A	TCGA-B6-A0IQ-01A	10.34	N1b	2	Alive	140.77	0
TCGA-B6-A0RI-01A	TCGA-B6-A0RI-01A	9.066	N1b	2	Alive	234.1	0
TCGA-B6-A0RP-01A	TCGA-B6-A0RP-01A	7.918	N1b	2	Dead	102.69	1
TCGA-B6-A0WV-01A	TCGA-B6-A0WV-01A	9.271	N1b	2	Dead	79.4	1
TCGA-B6-A0WW-01A	TCGA-B6-A0WW-01A	10.6	N1b	2	Dead	18.33	1
TCGA-B6-A0WX-01A	TCGA-B6-A0WX-01A	10.95	N1b	2	Dead	20.99	1
TCGA-B6-A0WY-01A	TCGA-B6-A0WY-01A	10.88	N1b	2	Dead	113.7	1
TCGA-B6-A0WZ-01A	TCGA-B6-A0WZ-01A	10.03	N1b	2	Alive	206.7	0
TCGA-B6-A0X4-01A	TCGA-B6-A0X4-01A	8.903	N1b	2	Dead	28.25	1
TCGA-B6-A0X5-01A	TCGA-B6-A0X5-01A	9.797	N1b	2	Dead	68.89	1
TCGA-BH-A18N-01A	TCGA-BH-A18N-01A	7.588	N1b	2	Dead	37.71	1
TCGA-BH-A18Q-01A	TCGA-BH-A18Q-01A	10.97	N1b	2	Dead	55.58	1
TCGA-BH-A18V-01A	TCGA-BH-A18V-01A	7.56	N1b	2	Dead	51.12	1
TCGA-BH-A1EV-01A	TCGA-BH-A1EV-01A	11.14	N1b	2	Dead	11.99	1
TCGA-BH-A1EW-01A	TCGA-BH-A1EW-01A	10.34	N1b	2	Dead	55.65	1
TCGA-BH-A1EX-01A	TCGA-BH-A1EX-01A	8.305	N1b	2	Dead	49.54	1
TCGA-BH-A1F2-01A	TCGA-BH-A1F2-01A	7.929	N1b	2	Dead	31.5	1
TCGA-BH-A1FB-01A	TCGA-BH-A1FB-01A	11.16	N1b	2	Dead	120.53	1
TCGA-BH-A1FC-01A	TCGA-BH-A1FC-01A	11.5	N1b	2	Dead	114.06	1
TCGA-BH-A1FH-01A	TCGA-BH-A1FH-01A	10.15	N1b	2	Dead	33.97	1
TCGA-BH-A1FJ-01A	TCGA-BH-A1FJ-01A	8.539	N1b	2	Dead	63.3	1
TCGA-BH-A1FL-01A	TCGA-BH-A1FL-01A	9.65	N1b	2	Dead	54.96	1
TCGA-BH-A203-01A	TCGA-BH-A203-01A	11.92	N1b	2	Dead	38.57	1
TCGA-BH-A204-01A	TCGA-BH-A204-01A	10.96	N1b	2	Dead	83.25	1
TCGA-BH-A208-01A	TCGA-BH-A208-01A	9.729	N1b	2	Dead	57.79	1
TCGA-EW-A1P0-01A	TCGA-EW-A1P0-01A	10.15	N1b	2	Alive	41.1	0
TCGA-GM-A2DA-01A	TCGA-GM-A2DA-01A	8.19	N1b	2	Dead	216.59	1
TCGA-BH-A0BS-11A	TCGA-BH-A0BS-11A	11.97	N1c	2	Alive	85.81	0
TCGA-BH-A1F0-01A	TCGA-BH-A1F0-01A	11.59	N1c	2	Dead	25.79	1
TCGA-A2-A04W-01A	TCGA-A2-A04W-01A	8.881	N1mi	2	Alive	101.91	0
TCGA-A2-A04Y-01A	TCGA-A2-A04Y-01A	8.716	N1mi	2	Alive	36.1	0
TCGA-A2-A0ER-01A	TCGA-A2-A0ER-01A	10.65	N1mi	2	Alive	74.34	0
TCGA-A2-A0T3-01A	TCGA-A2-A0T3-01A	11.33	N1mi	2	Alive	49.8	0
TCGA-A2-A0YC-01A	TCGA-A2-A0YC-01A	9.107	N1mi	2	Alive	32.52	0
TCGA-A2-A3KD-01A	TCGA-A2-A3KD-01A	9.376	N1mi	2	Alive	39.62	0
TCGA-A2-A3XU-01A	TCGA-A2-A3XU-01A	8.944	N1mi	2	Dead	29.96	1
TCGA-A7-A4SB-01A	TCGA-A7-A4SB-01A	9.606	N1mi	2	Alive	13.73	0
TCGA-AC-A2FM-01A	TCGA-AC-A2FM-01A	10.67	N1mi	2	Dead	26.02	1
TCGA-AC-A3OD-01B	TCGA-AC-A3OD-01B	12.12	N1mi	2	Alive	14.82	0
TCGA-AC-A3QP-01A	TCGA-AC-A3QP-01A	10.34	N1mi	2	Alive	22.17	0
TCGA-AC-A3TM-01A	TCGA-AC-A3TM-01A	10.49	N1mi	2	Alive	25.03	0
TCGA-AC-A5EH-01A	TCGA-AC-A5EH-01A	8.452	N1mi	2	Alive	16.79	0
TCGA-AC-A5EI-01A	TCGA-AC-A5EI-01A		N1mi	2	Alive	14.52	0
TCGA-BH-A0BF-01A	TCGA-BH-A0BF-01A	10.87	N1mi	2	Dead	43.5	1
TCGA-BH-A0BT-01A	TCGA-BH-A0BT-01A	10.06	N1mi	2	Alive	77.69	0
TCGA-BH-A0C7-01B	TCGA-BH-A0C7-01B	9.43	N1mi	2	Alive	90.9	0
TCGA-BH-A18L-01A	TCGA-BH-A18L-01A	7.985	N1mi	2	Dead	26.64	1
TCGA-BH-A42V-01A	TCGA-BH-A42V-01A	11.29	N1mi	2	Alive	20.86	0
TCGA-E2-A106-01A	TCGA-E2-A106-01A	9.002	N1mi	2	Alive	83.48	0
TCGA-E2-A14Q-01A	TCGA-E2-A14Q-01A	9.953	N1mi	2	Alive	38.21	0
TCGA-E2-A158-01A	TCGA-E2-A158-01A	13.95	N1mi	2	Alive	14.78	0
TCGA-E2-A15H-01A	TCGA-E2-A15H-01A	9.806	N1mi	2	Alive	12.91	0
TCGA-E2-A1IG-01A	TCGA-E2-A1IG-01A	10.48	N1mi	2	Alive	70.3	0
TCGA-E2-A1IK-01A	TCGA-E2-A1IK-01A	10.47	N1mi	2	Alive	59.13	0
TCGA-E2-A1L6-01A	TCGA-E2-A1L6-01A	10.66	N1mi	2	Alive	54.14	0
TCGA-E2-A1L9-01A	TCGA-E2-A1L9-01A	9	N1mi	2	Alive	19.65	0
TCGA-E2-A570-01A	TCGA-E2-A570-01A	13.55	N1mi	2	Alive	30.58	0
TCGA-EW-A1J2-01A	TCGA-EW-A1J2-01A	9.733	N1mi	2	Alive	13.24	0
TCGA-EW-A1OV-01A	TCGA-EW-A1OV-01A	10.31	N1mi	2	Alive	25.92	0
TCGA-EW-A2FS-01A	TCGA-EW-A2FS-01A	10.2	N1mi	2	Alive	52.69	0
TCGA-GM-A5PX-01A	TCGA-GM-A5PX-01A	9.116	N1mi	2	Alive	18.1	0
TCGA-LD-A66U-01A	TCGA-LD-A66U-01A	11.37	N1mi	2	Alive	21.22	0
TCGA-OL-A66H-01A	TCGA-OL-A66H-01A	8.459	N1mi	2	Alive		0
TCGA-OL-A66I-01A	TCGA-OL-A66I-01A	15.97	N1mi	2	Alive	23.46	0
TCGA-S3-AA17-01A	TCGA-S3-AA17-01A	11.32	N1mi	2	Alive	13.93	0
TCGA-WT-AB41-01A	TCGA-WT-AB41-01A	13.13	N1mi	2	Alive	52.92	0
TCGA-A2-A0SW-01A	TCGA-A2-A0SW-01A	9.499	N2	3	Dead	44.84	1
TCGA-A2-A4S2-01A	TCGA-A2-A4S2-01A	11.08	N2	3	Alive	21.12	0
TCGA-A8-A06Q-01A	TCGA-A8-A06Q-01A	9.177	N2	3	Alive	1.02	0
TCGA-AN-A04A-01A	TCGA-AN-A04A-01A	7.629	N2	3	Alive	2.96	0
TCGA-AN-A0AS-01A	TCGA-AN-A0AS-01A	8.587	N2	3	Alive	0.33	0
TCGA-AN-A0FJ-01A	TCGA-AN-A0FJ-01A	15.32	N2	3	Alive	7.95	0
TCGA-AN-A0FW-01A	TCGA-AN-A0FW-01A	10.12	N2	3	Alive	0.36	0
TCGA-AN-A0FZ-01A	TCGA-AN-A0FZ-01A	10.02	N2	3	Alive	0.33	0
TCGA-AN-A0XN-01A	TCGA-AN-A0XN-01A	11.03	N2	3	Alive	0.33	0
TCGA-AN-A0XO-01A	TCGA-AN-A0XO-01A	10.33	N2	3	Alive	12.32	0
TCGA-AN-A0XP-01A	TCGA-AN-A0XP-01A	8.141	N2	3	Alive	0.3	0
TCGA-AN-A0XR-01A	TCGA-AN-A0XR-01A	8.889	N2	3	Alive	0.33	0
TCGA-AN-A0XS-01A	TCGA-AN-A0XS-01A	9.325	N2	3	Alive	0.33	0
TCGA-AN-A0XT-01A	TCGA-AN-A0XT-01A	10.73	N2	3	Alive	0.33	0
TCGA-AN-A0XV-01A	TCGA-AN-A0XV-01A	10.88	N2	3	Alive	5.32	0
TCGA-AN-A0XW-01A	TCGA-AN-A0XW-01A	8.73	N2	3	Alive	5.58	0
TCGA-AO-A03L-01A	TCGA-AO-A03L-01A	8.531	N2	3	Alive	80.22	0
TCGA-AR-A0TT-01A	TCGA-AR-A0TT-01A	10.28	N2	3	Alive	108.94	0
TCGA-AR-A0TZ-01A	TCGA-AR-A0TZ-01A	8.365	N2	3	Dead	107.16	1
TCGA-AR-A0U2-01A	TCGA-AR-A0U2-01A	9.219	N2	3	Dead	83.8	1
TCGA-AR-A1AR-01A	TCGA-AR-A1AR-01A	11.03	N2	3	Dead	17.21	1
TCGA-AR-A1AU-01A	TCGA-AR-A1AU-01A	8.993	N2	3	Alive	94.22	0
TCGA-AR-A24M-01A	TCGA-AR-A24M-01A	7.139	N2	3	Alive	120.24	0
TCGA-AR-A24O-01A	TCGA-AR-A24O-01A	9.505	N2	3	Alive	118.5	0
TCGA-AR-A24R-01A	TCGA-AR-A24R-01A	10.48	N2	3	Alive	112.68	0
TCGA-AR-A251-01A	TCGA-AR-A251-01A	12.55	N2	3	Alive	99.54	0
TCGA-AR-A254-01A	TCGA-AR-A254-01A	7.856	N2	3	Alive	85.58	0
TCGA-AR-A2LK-01A	TCGA-AR-A2LK-01A	10.35	N2	3	Dead	54.17	1
TCGA-B6-A0RV-01A	TCGA-B6-A0RV-01A	11.6	N2	3	Alive	169.38	0
TCGA-BH-A0B4-01A	TCGA-BH-A0B4-01A	10.16	N2	3	Alive	39.13	0
TCGA-BH-A18J-01A	TCGA-BH-A18J-01A	7.625	N2	3	Dead	20.11	1
TCGA-BH-A1F8-01A	TCGA-BH-A1F8-01A	10.8	N2	3	Dead	25.07	1
TCGA-BH-A1FM-01A	TCGA-BH-A1FM-01A	9.698	N2	3	Dead	45.6	1
TCGA-C8-A12Q-01A	TCGA-C8-A12Q-01A	9.683	N2	3	Dead	12.65	1
TCGA-C8-A130-01A	TCGA-C8-A130-01A	9.7	N2	3	Alive	12.16	0
TCGA-C8-A131-01A	TCGA-C8-A131-01A	8.11	N2	3	Alive	13.5	0
TCGA-C8-A138-01A	TCGA-C8-A138-01A	14.26	N2	3	Alive	12.48	0
TCGA-C8-A1HI-01A	TCGA-C8-A1HI-01A	8.46	N2	3	Alive	11.27	0
TCGA-C8-A26V-01A	TCGA-C8-A26V-01A	9.259	N2	3	Alive	20.24	0
TCGA-C8-A278-01A	TCGA-C8-A278-01A	9.066	N2	3	Alive	9.76	0
TCGA-C8-A8HP-01A	TCGA-C8-A8HP-01A	10.4	N2	3	Alive	13.01	0
TCGA-C8-A8HR-01A	TCGA-C8-A8HR-01A	9.882	N2	3	Alive	13.4	0
TCGA-E2-A14X-01A	TCGA-E2-A14X-01A	11.49	N2	3	Alive	31.93	0
TCGA-E2-A1B0-01A	TCGA-E2-A1B0-01A	9.591	N2	3	Alive	53.58	0
TCGA-E2-A1L7-01A	TCGA-E2-A1L7-01A	10.61	N2	3	Alive	60.32	0
TCGA-E2-A572-01A	TCGA-E2-A572-01A	10.14	N2	3	Alive	39.68	0
TCGA-E9-A1N3-01A	TCGA-E9-A1N3-01A	12.42	N2	3	Alive	34.79	0
TCGA-E9-A1N4-01A	TCGA-E9-A1N4-01A	9.234	N2	3	Alive	32.85	0
TCGA-E9-A1RE-01A	TCGA-E9-A1RE-01A	10.25	N2	3	Alive	46.62	0
TCGA-E9-A1RF-01A	TCGA-E9-A1RF-01A	7.553	N2	3	Alive	6.57	0
TCGA-E9-A1RG-01A	TCGA-E9-A1RG-01A	9.059	N2	3	Alive	21.25	0
TCGA-E9-A1RI-01A	TCGA-E9-A1RI-01A	9.413	N2	3	Alive	47.6	0
TCGA-E9-A226-01A	TCGA-E9-A226-01A	0	N2	3	Dead	34.43	1
TCGA-E9-A22E-01A	TCGA-E9-A22E-01A	7.681	N2	3	Alive	41.69	0
TCGA-E9-A54Y-01A	TCGA-E9-A54Y-01A	10.91	N2	3	Alive	23.82	0
TCGA-PL-A8LZ-01A	TCGA-PL-A8LZ-01A	9.49	N2	3	Alive	9.92	0
TCGA-4H-AAAK-01A	TCGA-4H-AAAK-01A	8.495	N2a	3	Alive	11.43	0
TCGA-A2-A0CK-01A	TCGA-A2-A0CK-01A	7.773	N2a	3	Alive	136.63	0
TCGA-A2-A0CL-01A	TCGA-A2-A0CL-01A	10.86	N2a	3	Alive	99.05	0
TCGA-A2-A0ET-01A	TCGA-A2-A0ET-01A	7.871	N2a	3	Alive	35.02	0
TCGA-A2-A0SV-01A	TCGA-A2-A0SV-01A	12.69	N2a	3	Dead	27.1	1
TCGA-A2-A0YH-01A	TCGA-A2-A0YH-01A	10.77	N2a	3	Alive	21.65	0
TCGA-A2-A0YJ-01A	TCGA-A2-A0YJ-01A	0	N2a	3	Alive	18.59	0
TCGA-A2-A0YL-01A	TCGA-A2-A0YL-01A	8.789	N2a	3	Alive	48.42	0
TCGA-A2-A0YT-01A	TCGA-A2-A0YT-01A	9.585	N2a	3	Dead	23.75	1
TCGA-A2-A1FW-01A	TCGA-A2-A1FW-01A	8.923	N2a	3	Alive	17.35	0
TCGA-A2-A1FX-01A	TCGA-A2-A1FX-01A	8.469	N2a	3	Alive	60.68	0
TCGA-A2-A1G6-01A	TCGA-A2-A1G6-01A	9.81	N2a	3	Alive	16.46	0
TCGA-A2-A25E-01A	TCGA-A2-A25E-01A	9.738	N2a	3	Alive	105.26	0
TCGA-A2-A3XS-01A	TCGA-A2-A3XS-01A	10.07	N2a	3	Dead	33.9	1
TCGA-A7-A2KD-01A	TCGA-A7-A2KD-01A	9.749	N2a	3	Alive	22.31	0
TCGA-A8-A06P-01A	TCGA-A8-A06P-01A	9.99	N2a	3	Alive	13.01	0
TCGA-A8-A07I-01A	TCGA-A8-A07I-01A	10.68	N2a	3	Alive	13.99	0
TCGA-A8-A07U-01A	TCGA-A8-A07U-01A	13.2	N2a	3	Alive	24.97	0
TCGA-A8-A08L-01A	TCGA-A8-A08L-01A	11.42	N2a	3	Dead	9.99	1
TCGA-A8-A08P-01A	TCGA-A8-A08P-01A	8.844	N2a	3	Alive	30.98	0
TCGA-A8-A092-01A	TCGA-A8-A092-01A	7.342	N2a	3	Alive	30.95	0
TCGA-A8-A09Q-01A	TCGA-A8-A09Q-01A	9.061	N2a	3	Alive	25	0
TCGA-AC-A2BK-01A	TCGA-AC-A2BK-01A	9.858	N2a	3	Alive	73	0
TCGA-AC-A3BB-01A	TCGA-AC-A3BB-01A	10.64	N2a	3	Alive	32.42	0
TCGA-AO-A0JE-01A	TCGA-AO-A0JE-01A	10	N2a	3	Alive	76.71	0
TCGA-AO-A0JG-01A	TCGA-AO-A0JG-01A	9.533	N2a	3	Alive	26.22	0
TCGA-AO-A0JL-01A	TCGA-AO-A0JL-01A	7.412	N2a	3	Alive	55.29	0
TCGA-AQ-A04H-01B	TCGA-AQ-A04H-01B	8.39	N2a	3	Alive	24.77	0
TCGA-AQ-A0Y5-01A	TCGA-AQ-A0Y5-01A	0	N2a	3	Dead	5.65	1
TCGA-AQ-A1H2-01A	TCGA-AQ-A1H2-01A	6.191	N2a	3	Alive	15.6	0
TCGA-AQ-A7U7-01A	TCGA-AQ-A7U7-01A	10.28	N2a	3	Dead	19.19	1
TCGA-B6-A400-01A	TCGA-B6-A400-01A	11.45	N2a	3	Alive	7.06	0
TCGA-B6-A409-01A	TCGA-B6-A409-01A	9.976	N2a	3	Dead	18.82	1
TCGA-BH-A0B5-01A	TCGA-BH-A0B5-01A	13.47	N2a	3	Alive	70.17	0
TCGA-BH-A0C1-01B	TCGA-BH-A0C1-01B	8.117	N2a	3	Dead	46.35	1
TCGA-BH-A0DS-01A	TCGA-BH-A0DS-01A	12.87	N2a	3	Alive	2.56	0
TCGA-BH-A0DV-01A	TCGA-BH-A0DV-01A	9.971	N2a	3	Alive	67.81	0
TCGA-BH-A0E2-01A	TCGA-BH-A0E2-01A	12.07	N2a	3	Alive	14.29	0
TCGA-BH-A0H7-01A	TCGA-BH-A0H7-01A	10.77	N2a	3	Alive	23.06	0
TCGA-BH-A0HP-01A	TCGA-BH-A0HP-01A	9.048	N2a	3	Alive	13.6	0
TCGA-BH-A18U-01A	TCGA-BH-A18U-01A	6.623	N2a	3	Dead	51.35	1
TCGA-BH-A1F6-01A	TCGA-BH-A1F6-01A	9.844	N2a	3	Dead	97.4	1
TCGA-D8-A13Z-01A	TCGA-D8-A13Z-01A	9.376	N2a	3	Alive	20.86	0
TCGA-D8-A1JC-01A	TCGA-D8-A1JC-01A	11.47	N2a	3	Alive	15.77	0
TCGA-D8-A1JF-01A	TCGA-D8-A1JF-01A	9.363	N2a	3	Alive	12.02	0
TCGA-D8-A1X6-01A	TCGA-D8-A1X6-01A	7.814	N2a	3	Alive	17.77	0
TCGA-D8-A1X8-01A	TCGA-D8-A1X8-01A	9.062	N2a	3	Alive	25.72	0
TCGA-D8-A1XD-01A	TCGA-D8-A1XD-01A	11.15	N2a	3	Alive	17.15	0
TCGA-D8-A1XZ-01A	TCGA-D8-A1XZ-01A	8.854	N2a	3	Alive	15.31	0
TCGA-D8-A1Y0-01A	TCGA-D8-A1Y0-01A	10.76	N2a	3	Alive	15.51	0
TCGA-D8-A1Y3-01A	TCGA-D8-A1Y3-01A	13.3	N2a	3	Alive	14.13	0
TCGA-D8-A27I-01A	TCGA-D8-A27I-01A	10.46	N2a	3	Alive	14.42	0
TCGA-D8-A27L-01A	TCGA-D8-A27L-01A	14.64	N2a	3	Alive	16.39	0
TCGA-D8-A27N-01A	TCGA-D8-A27N-01A	9.497	N2a	3	Alive	17.05	0
TCGA-E2-A107-01A	TCGA-E2-A107-01A	10.57	N2a	3	Alive	34.4	0
TCGA-E2-A108-01A	TCGA-E2-A108-01A	10.32	N2a	3	Alive	27.5	0
TCGA-E2-A1B4-01A	TCGA-E2-A1B4-01A	9.229	N2a	3	Dead	32.98	1
TCGA-E2-A1LL-01A	TCGA-E2-A1LL-01A	12.09	N2a	3	Alive	43	0
TCGA-EW-A1IZ-01A	TCGA-EW-A1IZ-01A	11.11	N2a	3	Alive	18.2	0
TCGA-GM-A3XN-01A	TCGA-GM-A3XN-01A	11.13	N2a	3	Alive	66.33	0
TCGA-LL-A6FQ-01A	TCGA-LL-A6FQ-01A	9.475	N2a	3	Alive	2.63	0
TCGA-PE-A5DC-01A	TCGA-PE-A5DC-01A	10.18	N2a	3	Dead	46.98	1
TCGA-V7-A7HQ-01A	TCGA-V7-A7HQ-01A	9.822	N2a	3	Alive	66.79	0
TCGA-XX-A899-01A	TCGA-XX-A899-01A	11.85	N2a	3	Alive	15.34	0
TCGA-A2-A0T1-01A	TCGA-A2-A0T1-01A	10.72	N3	4	Alive	17.12	0
TCGA-A2-A0T2-01A	TCGA-A2-A0T2-01A	0	N3	4	Dead	8.38	1
TCGA-A8-A079-01A	TCGA-A8-A079-01A	8.179	N3	4	Alive	9	0
TCGA-A8-A08J-01A	TCGA-A8-A08J-01A	8.092	N3	4	Dead	37.02	1
TCGA-A8-A09W-01A	TCGA-A8-A09W-01A	6.976	N3	4	Alive	0.99	0
TCGA-AC-A3EH-01A	TCGA-AC-A3EH-01A	12.31	N3	4	Dead	6.47	1
TCGA-AO-A0J9-01A	TCGA-AO-A0J9-01A	11.55	N3	4	Alive	52.99	0
TCGA-AO-A0JA-01A	TCGA-AO-A0JA-01A	9.596	N3	4	Alive	21.52	0
TCGA-AR-A24T-01A	TCGA-AR-A24T-01A	7.456	N3	4	Alive	105.19	0
TCGA-AR-A2LH-01A	TCGA-AR-A2LH-01A	11.43	N3	4	Dead	20.24	1
TCGA-AR-A5QN-01A	TCGA-AR-A5QN-01A	12.73	N3	4	Alive	33.28	0
TCGA-B6-A0IB-01A	TCGA-B6-A0IB-01A	8.54	N3	4	Dead	129.47	1
TCGA-BH-A0BC-01A	TCGA-BH-A0BC-01A	10.4	N3	4	Alive	32	0
TCGA-BH-A28O-01A	TCGA-BH-A28O-01A	11.35	N3	4	Alive	36.79	0
TCGA-C8-A1HO-01A	TCGA-C8-A1HO-01A	11.85	N3	4	Alive	12.32	0
TCGA-E2-A14P-01A	TCGA-E2-A14P-01A	11.45	N3	4	Alive	40.93	0
TCGA-E2-A2P5-01A	TCGA-E2-A2P5-01A	10.44	N3	4	Dead	26.97	1
TCGA-E2-A3DX-01A	TCGA-E2-A3DX-01A	11.15	N3	4	Alive	43.53	0
TCGA-E9-A1R2-01A	TCGA-E9-A1R2-01A	11.72	N3	4	Alive	34.92	0
TCGA-E9-A1R3-01A	TCGA-E9-A1R3-01A	8.866	N3	4	Alive	2.56	0
TCGA-E9-A1RC-01A	TCGA-E9-A1RC-01A	12.48	N3	4	Alive	40.21	0
TCGA-E9-A3Q9-01A	TCGA-E9-A3Q9-01A	8.759	N3	4	Alive	32.88	0
TCGA-E9-A5FK-01A	TCGA-E9-A5FK-01A	10.69	N3	4	Alive	26.68	0
TCGA-E9-A6HE-01A	TCGA-E9-A6HE-01A	10.73	N3	4	Alive	27.83	0
TCGA-OL-A5RV-01A	TCGA-OL-A5RV-01A	10.36	N3	4	Alive	34.89	0
TCGA-OL-A66N-01A	TCGA-OL-A66N-01A	9.523	N3	4	Alive	26.02	0
TCGA-A2-A0CS-01A	TCGA-A2-A0CS-01A	12.3	N3a	4	Dead	77.14	1
TCGA-A2-A0EW-01A	TCGA-A2-A0EW-01A	11.02	N3a	4	Dead	61.89	1
TCGA-A2-A0YG-01A	TCGA-A2-A0YG-01A	9.851	N3a	4	Alive	21.88	0
TCGA-A2-A25D-01A	TCGA-A2-A25D-01A	9.31	N3a	4	Alive	18.13	0
TCGA-A2-A4RW-01A	TCGA-A2-A4RW-01A	10.81	N3a	4	Alive	7.29	0
TCGA-A2-A4RY-01A	TCGA-A2-A4RY-01A	12.66	N3a	4	Alive	21.29	0
TCGA-A7-A425-01A	TCGA-A7-A425-01A	10.8	N3a	4	Alive	14.68	0
TCGA-A7-A426-01A	TCGA-A7-A426-01A	10.96	N3a	4	Alive	11.96	0
TCGA-A7-A5ZX-01A	TCGA-A7-A5ZX-01A	10.92	N3a	4	Alive	11.04	0
TCGA-A8-A07E-01A	TCGA-A8-A07E-01A	9.458	N3a	4	Alive	19.97	0
TCGA-A8-A07R-01A	TCGA-A8-A07R-01A	8.411	N3a	4	Alive	8.97	0
TCGA-A8-A08F-01A	TCGA-A8-A08F-01A	11.42	N3a	4	Alive	32.98	0
TCGA-A8-A08O-01A	TCGA-A8-A08O-01A	8.84	N3a	4	Alive	30.98	0
TCGA-A8-A08X-01A	TCGA-A8-A08X-01A	9.924	N3a	4	Alive	42.97	0
TCGA-A8-A08Z-01A	TCGA-A8-A08Z-01A	11.91	N3a	4	Alive	39.98	0
TCGA-A8-A099-01A	TCGA-A8-A099-01A	7.331	N3a	4	Alive	9.99	0
TCGA-A8-A09G-01A	TCGA-A8-A09G-01A	9.547	N3a	4	Alive	0	0
TCGA-A8-A09M-01A	TCGA-A8-A09M-01A	9.981	N3a	4	Alive	33.05	0
TCGA-A8-A09N-01A	TCGA-A8-A09N-01A	9.334	N3a	4	Alive	1.02	0
TCGA-A8-A09X-01A	TCGA-A8-A09X-01A	10.01	N3a	4	Dead	13.99	1
TCGA-A8-A0A6-01A	TCGA-A8-A0A6-01A	10.5	N3a	4	Alive	21.02	0
TCGA-AC-A2FE-01A	TCGA-AC-A2FE-01A	10.72	N3a	4	Dead	86.6	1
TCGA-AC-A2FK-01A	TCGA-AC-A2FK-01A	10.84	N3a	4	Alive	87.06	0
TCGA-AC-A3YI-01A	TCGA-AC-A3YI-01A	11.58	N3a	4	Alive	23.23	0
TCGA-AC-A6IX-01A	TCGA-AC-A6IX-01A	9.433	N3a	4	Alive	12.25	0
TCGA-AQ-A1H3-01A	TCGA-AQ-A1H3-01A	10.41	N3a	4	Alive	32.49	0
TCGA-B6-A408-01A	TCGA-B6-A408-01A	15.05	N3a	4	Alive	68.07	0
TCGA-BH-A0BA-01A	TCGA-BH-A0BA-01A	9.71	N3a	4	Alive	37.19	0
TCGA-BH-A0E0-01A	TCGA-BH-A0E0-01A	12.5	N3a	4	Alive	4.4	0
TCGA-D8-A1JN-01A	TCGA-D8-A1JN-01A	8.202	N3a	4	Alive	20.37	0
TCGA-D8-A1X5-01A	TCGA-D8-A1X5-01A	6.968	N3a	4	Alive	18.56	0
TCGA-D8-A1XS-01A	TCGA-D8-A1XS-01A	9.606	N3a	4	Alive	16.29	0
TCGA-D8-A27R-01A	TCGA-D8-A27R-01A	11.4	N3a	4	Alive	10.09	0
TCGA-D8-A27T-01A	TCGA-D8-A27T-01A	9.295	N3a	4	Alive	13.07	0
TCGA-D8-A3Z5-01A	TCGA-D8-A3Z5-01A	9.56	N3a	4	Alive	33.34	0
TCGA-D8-A3Z6-01A	TCGA-D8-A3Z6-01A	8.839	N3a	4	Alive	18.5	0
TCGA-E2-A15A-01A	TCGA-E2-A15A-01A	6.452	N3a	4	Alive	23.32	0
TCGA-E2-A1LE-01A	TCGA-E2-A1LE-01A	8.452	N3a	4	Dead	28.88	1
TCGA-E2-A1LK-01A	TCGA-E2-A1LK-01A	12.18	N3a	4	Dead	8.74	1
TCGA-E2-A9RU-01A	TCGA-E2-A9RU-01A	12.45	N3a	4	Alive	17.67	0
TCGA-EW-A2FR-01A	TCGA-EW-A2FR-01A	10.15	N3a	4	Alive	54.96	0
TCGA-EW-A2FV-01A	TCGA-EW-A2FV-01A	9.863	N3a	4	Alive	25.89	0
TCGA-GM-A4E0-01A	TCGA-GM-A4E0-01A	10.64	N3a	4	Alive	71.98	0
TCGA-LD-A74U-01A	TCGA-LD-A74U-01A	11.07	N3a	4	Alive	13.21	0
TCGA-LD-A7W5-01A	TCGA-LD-A7W5-01A		N3a	4	Alive	7.1	0
TCGA-LL-A9Q3-01A	TCGA-LL-A9Q3-01A	10.75	N3a	4	Alive	17.48	0
TCGA-S3-A6ZH-01A	TCGA-S3-A6ZH-01A	10.89	N3a	4	Alive	21.06	0
TCGA-EW-A1P1-01A	TCGA-EW-A1P1-01A	10.43	N3b	4	Alive	39.75	0
TCGA-EW-A1P8-01A	TCGA-EW-A1P8-01A	13.12	N3b	4	Dead	7.85	1
TCGA-UU-A93S-01A	TCGA-UU-A93S-01A	10.78	N3b	4	Dead	3.81	1
TCGA-A2-A04P-01A	TCGA-A2-A04P-01A	10.98	N3c	4	Dead	18	1
TCGA-AC-A23H-01A	TCGA-AC-A23H-01A	6.378	NX	5	Dead	5.72	1
TCGA-B6-A0I9-01A	TCGA-B6-A0I9-01A	8.772	NX	5	Dead	11.89	1
TCGA-B6-A0IC-01A	TCGA-B6-A0IC-01A	9.394	NX	5	Dead	50.66	1
TCGA-B6-A0RM-01A	TCGA-B6-A0RM-01A	8.616	NX	5	Dead	77.96	1
TCGA-B6-A0WS-01A	TCGA-B6-A0WS-01A	11.35	NX	5	Dead	97.4	1
TCGA-BH-A1EN-01A	TCGA-BH-A1EN-01A	9.571	NX	5	Dead	69.88	1
TCGA-BH-A1FG-01A	TCGA-BH-A1FG-01A	10.5	NX	5	Dead	122.73	1
TCGA-BH-A0B2-01A	TCGA-BH-A0B2-01A	12.8
Total 1283; out of which
179 samples are
duplicated;
Out of this duplication
6 samples - triplicated
173 samples -duplicated
6 x 2 =12
173 x 1 = 173
Total 185
1283-185=1098 (TCGA)
Duplicates Removed
Xena Star Values
Cbioportal-rest

## Sheet: Lnode-OS-04-12-19-Low-25%
sample	sample	Star (fkpm+uq+1)	Neoplasm Disease Lymph Node Stage American Joint Committee on Cancer Code	Node - N0=1; N1=2; N2=3; N3 = 4; NX =5	Patient's Vital Status	Overall Survival (Months)	Dead=1; Alive =0
TCGA-A8-A07B-01A	TCGA-A8-A07B-01A	0	N0	1	Alive	42.97	0
TCGA-A8-A09T-01A	TCGA-A8-A09T-01A	0	N0	1	Alive	19.02	0
TCGA-AN-A03X-01A	TCGA-AN-A03X-01A	0	N0	1	Alive	0.33	0
TCGA-BH-A18G-01A	TCGA-BH-A18G-01A	0	N0	1	Alive	4.89	0
TCGA-AR-A24S-01A	TCGA-AR-A24S-01A	6.35	N0	1	Alive	97.77	0
TCGA-AN-A0G0-01A	TCGA-AN-A0G0-01A	6.4	N0	1	Alive	0.53	0
TCGA-E2-A152-01A	TCGA-E2-A152-01A	6.811	N0	1	Alive	69.91	0
TCGA-E9-A5UO-01A	TCGA-E9-A5UO-01A	6.883	N0	1	Alive	25.79	0
TCGA-A8-A06Y-01A	TCGA-A8-A06Y-01A	6.892	N0	1	Alive	25.99	0
TCGA-E9-A1N9-01A	TCGA-E9-A1N9-01A	6.96	N0	1	Alive	36.17	0
TCGA-A8-A0AD-01A	TCGA-A8-A0AD-01A	6.971	N0	1	Alive	38.01	0
TCGA-C8-A12T-01A	TCGA-C8-A12T-01A	7.01	N0	1	Alive	0	0
TCGA-AR-A2LE-01A	TCGA-AR-A2LE-01A	7.068	N0	1	Alive	166.29	0
TCGA-D8-A1JK-01A	TCGA-D8-A1JK-01A	7.075	N0	1	Alive	20.11	0
TCGA-D8-A27W-01A	TCGA-D8-A27W-01A	7.099	N0	1	Alive	12.25	0
TCGA-D8-A1XW-01A	TCGA-D8-A1XW-01A	7.335	N0	1	Alive	43	0
TCGA-A7-A4SF-01A	TCGA-A7-A4SF-01A	7.341	N0	1	Alive	17.9	0
TCGA-E9-A1NG-01A	TCGA-E9-A1NG-01A	7.391	N0	1	Dead	25.82	1
TCGA-AN-A0AR-01A	TCGA-AN-A0AR-01A	7.632	N0	1	Alive	0.33	0
TCGA-A8-A08A-01A	TCGA-A8-A08A-01A	7.664	N0	1	Alive	0.99	0
TCGA-AR-A0TV-01A	TCGA-AR-A0TV-01A	7.664	N0	1	Alive	75.16	0
TCGA-AN-A0FK-01A	TCGA-AN-A0FK-01A	7.733	N0	1	Alive	7	0
TCGA-A7-A3J0-01A	TCGA-A7-A3J0-01A	7.775	N0	1	Alive	10.28	0
TCGA-E2-A15G-01A	TCGA-E2-A15G-01A	7.817	N0	1	Alive	18.2	0
TCGA-A8-A0A9-01A	TCGA-A8-A0A9-01A	7.896	N0	1	Alive	27	0
TCGA-AR-A24Q-01A	TCGA-AR-A24Q-01A	7.924	N0	1	Alive	104.2	0
TCGA-D8-A1XQ-01A	TCGA-D8-A1XQ-01A	7.929	N0	1	Alive	16.39	0
TCGA-D8-A1JJ-01A	TCGA-D8-A1JJ-01A	7.948	N0	1	Alive	20.07	0
TCGA-EW-A1OX-01A	TCGA-EW-A1OX-01A	7.955	N0	1	Alive	29.93	0
TCGA-A2-A4S1-01A	TCGA-A2-A4S1-01A	7.962	N0	1	Alive	26.94	0
TCGA-D8-A27G-01A	TCGA-D8-A27G-01A	7.992	N0	1	Alive	13.44	0
TCGA-BH-A1FN-01A	TCGA-BH-A1FN-01A	8.044	N0	1	Dead	72.01	1
TCGA-E2-A15L-01A	TCGA-E2-A15L-01A	8.047	N0	1	Alive	20.57	0
TCGA-E9-A1R5-01A	TCGA-E9-A1R5-01A	8.052	N0	1	Alive	3.02	0
TCGA-BH-A5J0-01A	TCGA-BH-A5J0-01A	8.059	N0	1	Alive	23.49	0
TCGA-BH-A18S-01A	TCGA-BH-A18S-01A	8.121	N0	1	Dead	66	1
TCGA-A8-A06Z-01A	TCGA-A8-A06Z-01A	8.13	N0	1	Alive	1.02	0
TCGA-AR-A24X-01A	TCGA-AR-A24X-01A	8.132	N0	1	Alive	98.69	0
TCGA-AN-A0XU-01A	TCGA-AN-A0XU-01A	8.134	N0	1	Alive	0.33	0
TCGA-A2-A3XV-01A	TCGA-A2-A3XV-01A	8.135	N0	1	Alive	32.72	0
TCGA-A8-A07S-01A	TCGA-A8-A07S-01A	8.155	N0	1	Alive	7.98	0
TCGA-BH-A6R8-01A	TCGA-BH-A6R8-01A	8.172	N0	1	Alive	9.63	0
TCGA-AR-A2LL-01A	TCGA-AR-A2LL-01A	8.189	N0	1	Alive	66.1	0
TCGA-A8-A096-01A	TCGA-A8-A096-01A	8.209	N0	1	Alive	0	0
TCGA-A2-A4S0-01A	TCGA-A2-A4S0-01A	8.231	N0	1	Alive	23.19	0
TCGA-C8-A274-01A	TCGA-C8-A274-01A	8.231	N0	1	Alive	16.69	0
TCGA-Z7-A8R6-01A	TCGA-Z7-A8R6-01A	8.243	N0	1	Alive	106.96	0
TCGA-AR-A0TP-01A	TCGA-AR-A0TP-01A	8.259	N0	1	Alive	140.44	0
TCGA-AR-A24K-01A	TCGA-AR-A24K-01A	8.341	N0	1	Alive	50.85	0
TCGA-OL-A66K-01A	TCGA-OL-A66K-01A	8.387	N0	1	Dead	41.89	1
TCGA-D8-A1JU-01A	TCGA-D8-A1JU-01A	8.403	N0	1	Alive	14.68	0
TCGA-E9-A1RH-01A	TCGA-E9-A1RH-01A	8.502	N0	1	Alive	46.55	0
TCGA-D8-A13Y-01A	TCGA-D8-A13Y-01A	8.547	N0	1	Alive	56.77	0
TCGA-A2-A3XX-01A	TCGA-A2-A3XX-01A	8.593	N0	1	Dead	47.27	1
TCGA-BH-A18K-01A	TCGA-BH-A18K-01A	8.597	N0	1	Dead	90.77	1
TCGA-AR-A1AN-01A	TCGA-AR-A1AN-01A	8.612	N0	1	Alive	95.93	0
TCGA-A8-A09C-01A	TCGA-A8-A09C-01A		N0	1	Alive	1.02	0
TCGA-EW-A1OW-01A	TCGA-EW-A1OW-01A	8.621	N0	1	Alive	22.8	0
TCGA-D8-A27E-01A	TCGA-D8-A27E-01A	8.664	N0	1	Alive	17.41	0
TCGA-AN-A0FS-01A	TCGA-AN-A0FS-01A	8.684	N0	1	Alive	6.9	0
TCGA-E2-A156-01A	TCGA-E2-A156-01A	8.718	N0	1	Alive	23.85	0
TCGA-E9-A1R4-01A	TCGA-E9-A1R4-01A	8.723	N0	1	Alive	6.11	0
TCGA-EW-A1OY-01A	TCGA-EW-A1OY-01A	8.735	N0	1	Alive	29.83	0
TCGA-AN-A0FY-01A	TCGA-AN-A0FY-01A	8.758	N0	1	Alive	0.33	0
TCGA-A7-A56D-01A	TCGA-A7-A56D-01A	8.763	N0	1	Alive	14.72	0
TCGA-A8-A06X-01A	TCGA-A8-A06X-01A	8.771	N0	1	Dead	30.98	1
TCGA-D8-A1XV-01A	TCGA-D8-A1XV-01A	8.814	N0	1	Alive	15.14	0
TCGA-EW-A6SC-01A	TCGA-EW-A6SC-01A	8.826	N0	1	Alive	31.27	0
TCGA-A1-A0SD-01A	TCGA-A1-A0SD-01A	8.833	N0	1	Alive	14.36	0
TCGA-B6-A0I1-01A	TCGA-B6-A0I1-01A	8.84	N0	1	Dead	77.56	1
TCGA-BH-A1ET-01A	TCGA-BH-A1ET-01A	8.871	N0	1	Dead	82.79	1
TCGA-D8-A1X7-01A	TCGA-D8-A1X7-01A	8.879	N0	1	Alive	16.72	0
TCGA-A7-A4SE-01A	TCGA-A7-A4SE-01A	8.902	N0	1	Alive	21.16	0
TCGA-A7-A0CD-01A	TCGA-A7-A0CD-01A	8.919	N0	1	Alive	38.27	0
TCGA-E9-A1NF-01A	TCGA-E9-A1NF-01A	8.956	N0	1	Dead	35.22	1
TCGA-D8-A1JS-01A	TCGA-D8-A1JS-01A	8.958	N0	1	Alive	12.19	0
TCGA-E2-A15J-01A	TCGA-E2-A15J-01A	8.958	N0	1	Alive	53.88	0
TCGA-D8-A73U-01A	TCGA-D8-A73U-01A	8.981	N0	1	Alive	16.16	0
TCGA-AN-A03Y-01A	TCGA-AN-A03Y-01A	8.999	N0	1	Alive	0.33	0
TCGA-C8-A1HE-01A	TCGA-C8-A1HE-01A	8.999	N0	1	Alive	12.32	0
TCGA-E2-A1LG-01A	TCGA-E2-A1LG-01A	9.013	N0	1	Alive	50.03	0
TCGA-D8-A1XY-01A	TCGA-D8-A1XY-01A	9.06	N0	1	Alive	16.52	0
TCGA-E2-A14W-01A	TCGA-E2-A14W-01A	9.086	N0	1	Alive	32	0
TCGA-E9-A1RD-01A	TCGA-E9-A1RD-01A	9.109	N0	1	Alive	1.12	0
TCGA-A2-A04R-01A	TCGA-A2-A04R-01A	0	N0 (i-)	1	Alive	121.85	0
TCGA-AO-A126-01A	TCGA-AO-A126-01A	0	N0 (i-)	1	Alive	108.64	0
TCGA-C8-A12M-01A	TCGA-C8-A12M-01A	0	N0 (i-)	1	Alive	11.76	0
TCGA-BH-A0HU-01A	TCGA-BH-A0HU-01A	6.555	N0 (i-)	1	Alive	12.88	0
TCGA-A2-A1FZ-01A	TCGA-A2-A1FZ-01A	6.812	N0 (i-)	1	Alive	22.44	0
TCGA-A7-A0CH-01A	TCGA-A7-A0CH-01A	6.915	N0 (i-)	1	Alive	35.45	0
TCGA-AO-A12B-01A	TCGA-AO-A12B-01A	6.966	N0 (i-)	1	Alive	98.19	0
TCGA-B6-A0X0-01A	TCGA-B6-A0X0-01A	7.479	N0 (i-)	1	Dead	129.6	1
TCGA-A2-A0D0-01A	TCGA-A2-A0D0-01A	7.938	N0 (i-)	1	Alive	67.28	0
TCGA-AC-A3YJ-01A	TCGA-AC-A3YJ-01A	8.131	N0 (i-)	1	Alive	24.77	0
TCGA-BH-A0WA-01A	TCGA-BH-A0WA-01A	8.157	N0 (i-)	1	Alive	23.03	0
TCGA-AC-A8OR-01A	TCGA-AC-A8OR-01A	8.204	N0 (i-)	1	Alive	1.31	0
TCGA-LL-A442-01A	TCGA-LL-A442-01A	8.236	N0 (i-)	1	Alive	29.2	0
TCGA-BH-A0H0-01A	TCGA-BH-A0H0-01A	8.241	N0 (i-)	1	Alive	15.14	0
TCGA-B6-A0IP-01A	TCGA-B6-A0IP-01A	8.243	N0 (i-)	1	Dead	128.98	1
TCGA-AO-A125-01A	TCGA-AO-A125-01A	8.302	N0 (i-)	1	Alive	113.53	0
TCGA-B6-A402-01A	TCGA-B6-A402-01A	8.345	N0 (i-)	1	Alive	74.93	0
TCGA-C8-A12L-01A	TCGA-C8-A12L-01A	8.371	N0 (i-)	1	Alive	11.93	0
TCGA-AO-A03U-01B	TCGA-AO-A03U-01B	8.436	N0 (i-)	1	Dead	58.9	1
TCGA-A1-A0SM-01A	TCGA-A1-A0SM-01A	8.455	N0 (i-)	1	Alive	7.95	0
TCGA-B6-A0RS-01A	TCGA-B6-A0RS-01A	8.463	N0 (i-)	1	Dead	100.62	1
TCGA-AO-A12H-01A	TCGA-AO-A12H-01A	8.51	N0 (i-)	1	Alive	40.54	0
TCGA-GM-A2DL-01A	TCGA-GM-A2DL-01A	8.673	N0 (i-)	1	Alive	115.6	0
TCGA-EW-A2FW-01A	TCGA-EW-A2FW-01A	8.719	N0 (i-)	1	Alive	22.08	0
TCGA-B6-A0IA-01A	TCGA-B6-A0IA-01A	8.861	N0 (i-)	1	Alive	275.66	0
TCGA-A2-A0EV-01A	TCGA-A2-A0EV-01A	8.916	N0 (i-)	1	Alive	31.8	0
TCGA-B6-A0RU-01A	TCGA-B6-A0RU-01A	8.974	N0 (i-)	1	Alive	282.69	0
TCGA-B6-A40C-01A	TCGA-B6-A40C-01A	9.035	N0 (i-)	1	Alive	71.09	0
TCGA-BH-A0B8-01A	TCGA-BH-A0B8-01A	9.039	N0 (i-)	1	Alive	51.54	0
TCGA-AC-A2B8-01A	TCGA-AC-A2B8-01A	9.053	N0 (i-)	1	Alive	22.24	0
TCGA-A2-A0T4-01A	TCGA-A2-A0T4-01A	9.086	N0 (i-)	1	Alive	20.5	0
TCGA-A1-A0SE-01A	TCGA-A1-A0SE-01A	9.095	N0 (i-)	1	Alive	43.4	0
TCGA-BH-A0EB-01A	TCGA-BH-A0EB-01A	9.095	N0 (i-)	1	Alive	24.47	0
TCGA-AO-A12F-01A	TCGA-AO-A12F-01A	9.113	N0 (i-)	1	Alive	60.51	0
TCGA-AO-A12G-01A	TCGA-AO-A12G-01A	6.854	N0 (i+)	1	Alive	53.84	0
TCGA-A7-A26G-01A	TCGA-A7-A26G-01A	8.492	N0 (i+)	1	Alive	23.72	0
TCGA-BH-A42T-01A	TCGA-BH-A42T-01A	9.052	N0 (i+)	1	Dead	10.51	1
TCGA-AO-A03P-01A	TCGA-AO-A03P-01A	0	N1	2	Dead	95.63	1
TCGA-C8-A12P-01A	TCGA-C8-A12P-01A	0	N1	2	Alive	11.76	0
TCGA-C8-A135-01A	TCGA-C8-A135-01A	0	N1	2	Alive	12.91	0
TCGA-C8-A137-01A	TCGA-C8-A137-01A	0	N1	2	Alive	12.45	0
TCGA-A2-A0T0-01A	TCGA-A2-A0T0-01A	6.558	N1	2	Alive	17.51	0
TCGA-E2-A1LB-01A	TCGA-E2-A1LB-01A	7.025	N1	2	Alive	75.76	0
TCGA-AR-A1AS-01A	TCGA-AR-A1AS-01A	7.05	N1	2	Alive	37.78	0
TCGA-B6-A1KF-01A	TCGA-B6-A1KF-01A	7.097	N1	2	Alive	101.45	0
TCGA-A1-A0SN-01A	TCGA-A1-A0SN-01A	7.504	N1	2	Alive	39.29	0
TCGA-E2-A14V-01A	TCGA-E2-A14V-01A	7.525	N1	2	Alive	34.23	0
TCGA-A2-A25B-01A	TCGA-A2-A25B-01A	7.571	N1	2	Alive	42.41	0
TCGA-AN-A04C-01A	TCGA-AN-A04C-01A	7.632	N1	2	Alive	1.77	0
TCGA-A1-A0SQ-01A	TCGA-A1-A0SQ-01A	7.824	N1	2	Alive	18.2	0
TCGA-C8-A12Y-01A	TCGA-C8-A12Y-01A	7.923	N1	2	Alive	48.49	0
TCGA-C8-A12Z-01A	TCGA-C8-A12Z-01A	8.112	N1	2	Alive	12.55	0
TCGA-A8-A07P-01A	TCGA-A8-A07P-01A	8.196	N1	2	Alive	10.97	0
TCGA-A8-A09R-01A	TCGA-A8-A09R-01A	8.295	N1	2	Alive	8.97	0
TCGA-AR-A1AV-01A	TCGA-AR-A1AV-01A	8.342	N1	2	Alive	61.24	0
TCGA-E9-A24A-01A	TCGA-E9-A24A-01A	8.363	N1	2	Alive	24.54	0
TCGA-AR-A1AH-01A	TCGA-AR-A1AH-01A	8.566	N1	2	Alive	125.07	0
TCGA-A1-A0SO-01A	TCGA-A1-A0SO-01A	8.607	N1	2	Alive	27.99	0
TCGA-AR-A0TW-01A	TCGA-AR-A0TW-01A	8.624	N1	2	Alive	98.85	0
TCGA-BH-A18R-01A	TCGA-BH-A18R-01A	8.667	N1	2	Dead	37.52	1
TCGA-E2-A2P6-01A	TCGA-E2-A2P6-01A	8.792	N1	2	Alive	34.53	0
TCGA-C8-A1HL-01A	TCGA-C8-A1HL-01A	8.805	N1	2	Alive	10.41	0
TCGA-AR-A0TR-01A	TCGA-AR-A0TR-01A	8.862	N1	2	Dead	5.26	1
TCGA-A7-A6VY-01A	TCGA-A7-A6VY-01A	8.9	N1	2	Alive	8.74	0
TCGA-B6-A0I6-01A	TCGA-B6-A0I6-01A	8.967	N1	2	Dead	32.56	1
TCGA-BH-A18M-01A	TCGA-BH-A18M-01A	8.967	N1	2	Dead	72.5	1
TCGA-AR-A24V-01A	TCGA-AR-A24V-01A	8.982	N1	2	Alive	105.22	0
TCGA-A8-A06R-01A	TCGA-A8-A06R-01A	0	N1a	2	Alive	17.97	0
TCGA-BH-A0HL-01A	TCGA-BH-A0HL-01A	0	N1a	2	Alive	2.37	0
TCGA-D8-A1XR-01A	TCGA-D8-A1XR-01A	0	N1a	2	Alive	15.83	0
TCGA-AO-A0J5-01A	TCGA-AO-A0J5-01A	6.286	N1a	2	Dead	26.02	1
TCGA-D8-A1XC-01A	TCGA-D8-A1XC-01A	7.004	N1a	2	Dead	12.39	1
TCGA-AC-A62V-01A	TCGA-AC-A62V-01A	7.021	N1a	2	Dead	11.43	1
TCGA-D8-A1JE-01A	TCGA-D8-A1JE-01A	7.337	N1a	2	Alive	18.89	0
TCGA-BH-A0E7-01A	TCGA-BH-A0E7-01A	7.341	N1a	2	Alive	44.78	0
TCGA-A2-A0YE-01A	TCGA-A2-A0YE-01A	7.487	N1a	2	Alive	18.2	0
TCGA-A2-A3KC-01A	TCGA-A2-A3KC-01A	7.598	N1a	2	Alive	36.2	0
TCGA-D8-A1JD-01A	TCGA-D8-A1JD-01A	7.661	N1a	2	Alive	18.13	0
TCGA-A8-A09E-01A	TCGA-A8-A09E-01A	7.785	N1a	2	Alive	49.01	0
TCGA-BH-A0BV-01A	TCGA-BH-A0BV-01A	7.787	N1a	2	Alive	49.9	0
TCGA-BH-A0HO-01A	TCGA-BH-A0HO-01A	7.91	N1a	2	Alive	2.5	0
TCGA-E2-A155-01A	TCGA-E2-A155-01A	7.914	N1a	2	Alive	21.02	0
TCGA-E2-A10E-01A	TCGA-E2-A10E-01A	7.987	N1a	2	Alive	28.42	0
TCGA-A8-A07J-01A	TCGA-A8-A07J-01A	8.025	N1a	2	Alive	11.99	0
TCGA-AN-A041-01A	TCGA-AN-A041-01A	8.099	N1a	2	Alive	0.23	0
TCGA-E2-A15K-01A	TCGA-E2-A15K-01A	8.316	N1a	2	Alive	9.03	0
TCGA-A8-A085-01A	TCGA-A8-A085-01A	8.34	N1a	2	Alive	36.93	0
TCGA-D8-A140-01A	TCGA-D8-A140-01A	8.346	N1a	2	Alive	13.24	0
TCGA-BH-A0DH-01A	TCGA-BH-A0DH-01A	8.358	N1a	2	Alive	37.98	0
TCGA-D8-A1XJ-01A	TCGA-D8-A1XJ-01A	8.447	N1a	2	Alive	21.81	0
TCGA-A2-A25C-01A	TCGA-A2-A25C-01A	8.451	N1a	2	Alive	17.18	0
TCGA-A8-A07F-01A	TCGA-A8-A07F-01A	8.535	N1a	2	Alive	18.96	0
TCGA-A8-A09B-01A	TCGA-A8-A09B-01A	8.553	N1a	2	Alive	11.99	0
TCGA-D8-A1XO-01A	TCGA-D8-A1XO-01A	8.565	N1a	2	Alive	55.26	0
TCGA-PL-A8LX-01A	TCGA-PL-A8LX-01A	8.646	N1a	2	Alive	0.16	0
TCGA-BH-A0BJ-01A	TCGA-BH-A0BJ-01A	8.668	N1a	2	Alive	21.68	0
TCGA-EW-A1P5-01A	TCGA-EW-A1P5-01A	8.736	N1a	2	Alive	23.09	0
TCGA-BH-A0BZ-01A	TCGA-BH-A0BZ-01A	8.741	N1a	2	Alive	74.08	0
TCGA-E2-A1L8-01A	TCGA-E2-A1L8-01A	8.801	N1a	2	Alive	73.59	0
TCGA-EW-A1PG-01A	TCGA-EW-A1PG-01A	8.836	N1a	2	Alive	34.53	0
TCGA-BH-A0DD-01A	TCGA-BH-A0DD-01A	8.917	N1a	2	Alive	81.67	0
TCGA-E2-A1LA-01A	TCGA-E2-A1LA-01A	8.945	N1a	2	Alive	24.57	0
TCGA-D8-A1XT-01A	TCGA-D8-A1XT-01A	8.981	N1a	2	Alive	16.62	0
TCGA-A8-A075-01A	TCGA-A8-A075-01A	8.989	N1a	2	Alive	17.02	0
TCGA-A2-A0D4-01A	TCGA-A2-A0D4-01A	9.003	N1a	2	Alive	25.2	0
TCGA-A1-A0SJ-01A	TCGA-A1-A0SJ-01A	9.006	N1a	2	Alive	13.67	0
TCGA-AO-A0JF-01A	TCGA-AO-A0JF-01A	9.034	N1a	2	Alive	65.05	0
TCGA-BH-A0BM-01A	TCGA-BH-A0BM-01A	9.039	N1a	2	Alive	61.63	0
TCGA-E2-A15E-01A	TCGA-E2-A15E-01A	9.086	N1a	2	Alive	20.7	0
TCGA-LQ-A4E4-01A	TCGA-LQ-A4E4-01A	9.089	N1a	2	Alive	27.89	0
TCGA-BH-A18V-01A	TCGA-BH-A18V-01A	7.56	N1b	2	Dead	51.12	1
TCGA-BH-A18N-01A	TCGA-BH-A18N-01A	7.588	N1b	2	Dead	37.71	1
TCGA-B6-A0RP-01A	TCGA-B6-A0RP-01A	7.918	N1b	2	Dead	102.69	1
TCGA-BH-A1F2-01A	TCGA-BH-A1F2-01A	7.929	N1b	2	Dead	31.5	1
TCGA-GM-A2DA-01A	TCGA-GM-A2DA-01A	8.19	N1b	2	Dead	216.59	1
TCGA-BH-A1EX-01A	TCGA-BH-A1EX-01A	8.305	N1b	2	Dead	49.54	1
TCGA-BH-A1FJ-01A	TCGA-BH-A1FJ-01A	8.539	N1b	2	Dead	63.3	1
TCGA-B6-A0X4-01A	TCGA-B6-A0X4-01A	8.903	N1b	2	Dead	28.25	1
TCGA-B6-A0IE-01A	TCGA-B6-A0IE-01A	8.913	N1b	2	Dead	65.47	1
TCGA-B6-A0RI-01A	TCGA-B6-A0RI-01A	9.066	N1b	2	Alive	234.1	0
TCGA-BH-A18L-01A	TCGA-BH-A18L-01A	7.985	N1mi	2	Dead	26.64	1
TCGA-AC-A5EH-01A	TCGA-AC-A5EH-01A	8.452	N1mi	2	Alive	16.79	0
TCGA-A2-A04Y-01A	TCGA-A2-A04Y-01A	8.716	N1mi	2	Alive	36.1	0
TCGA-A2-A04W-01A	TCGA-A2-A04W-01A	8.881	N1mi	2	Alive	101.91	0
TCGA-A2-A3XU-01A	TCGA-A2-A3XU-01A	8.944	N1mi	2	Dead	29.96	1
TCGA-E2-A1L9-01A	TCGA-E2-A1L9-01A	9	N1mi	2	Alive	19.65	0
TCGA-E2-A106-01A	TCGA-E2-A106-01A	9.002	N1mi	2	Alive	83.48	0
TCGA-A2-A0YC-01A	TCGA-A2-A0YC-01A	9.107	N1mi	2	Alive	32.52	0
TCGA-E9-A226-01A	TCGA-E9-A226-01A	0	N2	3	Dead	34.43	1
TCGA-AR-A24M-01A	TCGA-AR-A24M-01A	7.139	N2	3	Alive	120.24	0
TCGA-E9-A1RF-01A	TCGA-E9-A1RF-01A	7.553	N2	3	Alive	6.57	0
TCGA-BH-A18J-01A	TCGA-BH-A18J-01A	7.625	N2	3	Dead	20.11	1
TCGA-AN-A04A-01A	TCGA-AN-A04A-01A	7.629	N2	3	Alive	2.96	0
TCGA-E9-A22E-01A	TCGA-E9-A22E-01A	7.681	N2	3	Alive	41.69	0
TCGA-AR-A254-01A	TCGA-AR-A254-01A	7.856	N2	3	Alive	85.58	0
TCGA-C8-A131-01A	TCGA-C8-A131-01A	8.11	N2	3	Alive	13.5	0
TCGA-AN-A0XP-01A	TCGA-AN-A0XP-01A	8.141	N2	3	Alive	0.3	0
TCGA-AR-A0TZ-01A	TCGA-AR-A0TZ-01A	8.365	N2	3	Dead	107.16	1
TCGA-C8-A1HI-01A	TCGA-C8-A1HI-01A	8.46	N2	3	Alive	11.27	0
TCGA-AO-A03L-01A	TCGA-AO-A03L-01A	8.531	N2	3	Alive	80.22	0
TCGA-AN-A0AS-01A	TCGA-AN-A0AS-01A	8.587	N2	3	Alive	0.33	0
TCGA-AN-A0XW-01A	TCGA-AN-A0XW-01A	8.73	N2	3	Alive	5.58	0
TCGA-AN-A0XR-01A	TCGA-AN-A0XR-01A	8.889	N2	3	Alive	0.33	0
TCGA-AR-A1AU-01A	TCGA-AR-A1AU-01A	8.993	N2	3	Alive	94.22	0
TCGA-E9-A1RG-01A	TCGA-E9-A1RG-01A	9.059	N2	3	Alive	21.25	0
TCGA-E2-A14S-01A	TCGA-E2-A14S-01A		N0	1	Alive	33.15	0
TCGA-C8-A278-01A	TCGA-C8-A278-01A	9.066	N2	3	Alive	9.76	0
TCGA-A2-A0YJ-01A	TCGA-A2-A0YJ-01A	0	N2a	3	Alive	18.59	0
TCGA-AQ-A0Y5-01A	TCGA-AQ-A0Y5-01A	0	N2a	3	Dead	5.65	1
TCGA-AQ-A1H2-01A	TCGA-AQ-A1H2-01A	6.191	N2a	3	Alive	15.6	0
TCGA-BH-A18U-01A	TCGA-BH-A18U-01A	6.623	N2a	3	Dead	51.35	1
TCGA-A8-A092-01A	TCGA-A8-A092-01A	7.342	N2a	3	Alive	30.95	0
TCGA-AO-A0JL-01A	TCGA-AO-A0JL-01A	7.412	N2a	3	Alive	55.29	0
TCGA-A2-A0CK-01A	TCGA-A2-A0CK-01A	7.773	N2a	3	Alive	136.63	0
TCGA-D8-A1X6-01A	TCGA-D8-A1X6-01A	7.814	N2a	3	Alive	17.77	0
TCGA-A2-A0ET-01A	TCGA-A2-A0ET-01A	7.871	N2a	3	Alive	35.02	0
TCGA-BH-A0C1-01B	TCGA-BH-A0C1-01B	8.117	N2a	3	Dead	46.35	1
TCGA-AQ-A04H-01B	TCGA-AQ-A04H-01B	8.39	N2a	3	Alive	24.77	0
TCGA-A2-A1FX-01A	TCGA-A2-A1FX-01A	8.469	N2a	3	Alive	60.68	0
TCGA-4H-AAAK-01A	TCGA-4H-AAAK-01A	8.495	N2a	3	Alive	11.43	0
TCGA-A2-A0YL-01A	TCGA-A2-A0YL-01A	8.789	N2a	3	Alive	48.42	0
TCGA-A8-A08P-01A	TCGA-A8-A08P-01A	8.844	N2a	3	Alive	30.98	0
TCGA-D8-A1XZ-01A	TCGA-D8-A1XZ-01A	8.854	N2a	3	Alive	15.31	0
TCGA-A2-A1FW-01A	TCGA-A2-A1FW-01A	8.923	N2a	3	Alive	17.35	0
TCGA-BH-A0HP-01A	TCGA-BH-A0HP-01A	9.048	N2a	3	Alive	13.6	0
TCGA-A8-A09Q-01A	TCGA-A8-A09Q-01A	9.061	N2a	3	Alive	25	0
TCGA-D8-A1X8-01A	TCGA-D8-A1X8-01A	9.062	N2a	3	Alive	25.72	0
TCGA-A2-A0T2-01A	TCGA-A2-A0T2-01A	0	N3	4	Dead	8.38	1
TCGA-A8-A09W-01A	TCGA-A8-A09W-01A	6.976	N3	4	Alive	0.99	0
TCGA-AR-A24T-01A	TCGA-AR-A24T-01A	7.456	N3	4	Alive	105.19	0
TCGA-A8-A08J-01A	TCGA-A8-A08J-01A	8.092	N3	4	Dead	37.02	1
TCGA-A8-A079-01A	TCGA-A8-A079-01A	8.179	N3	4	Alive	9	0
TCGA-B6-A0IB-01A	TCGA-B6-A0IB-01A	8.54	N3	4	Dead	129.47	1
TCGA-E9-A3Q9-01A	TCGA-E9-A3Q9-01A	8.759	N3	4	Alive	32.88	0
TCGA-E9-A1R3-01A	TCGA-E9-A1R3-01A	8.866	N3	4	Alive	2.56	0
TCGA-E2-A15A-01A	TCGA-E2-A15A-01A	6.452	N3a	4	Alive	23.32	0
TCGA-D8-A1X5-01A	TCGA-D8-A1X5-01A	6.968	N3a	4	Alive	18.56	0
TCGA-A8-A099-01A	TCGA-A8-A099-01A	7.331	N3a	4	Alive	9.99	0
TCGA-D8-A1JN-01A	TCGA-D8-A1JN-01A	8.202	N3a	4	Alive	20.37	0
TCGA-A8-A07R-01A	TCGA-A8-A07R-01A	8.411	N3a	4	Alive	8.97	0
TCGA-E2-A1LE-01A	TCGA-E2-A1LE-01A	8.452	N3a	4	Dead	28.88	1
TCGA-D8-A3Z6-01A	TCGA-D8-A3Z6-01A	8.839	N3a	4	Alive	18.5	0
TCGA-A8-A08O-01A	TCGA-A8-A08O-01A	8.84	N3a	4	Alive	30.98	0
TCGA-AC-A23H-01A	TCGA-AC-A23H-01A	6.378	NX	5	Dead	5.72	1
TCGA-B6-A0RM-01A	TCGA-B6-A0RM-01A	8.616	NX	5	Dead	77.96	1
TCGA-B6-A0I9-01A	TCGA-B6-A0I9-01A	8.772	NX	5	Dead	11.89	1
TCGA-AR-A0U1-01A	TCGA-AR-A0U1-01A		N1	2	Alive	133.11	0
TCGA-C8-A9FZ-01A	TCGA-C8-A9FZ-01A		N1	2	Alive	19.45	0
TCGA-E9-A245-01A	TCGA-E9-A245-01A	11.14	N1	2	Dead		1
TCGA-AC-A5EI-01A	TCGA-AC-A5EI-01A		N1mi	2	Alive	14.52	0
TCGA-OL-A66H-01A	TCGA-OL-A66H-01A	8.459	N1mi	2	Alive		0
TCGA-LD-A7W5-01A	TCGA-LD-A7W5-01A		N3a	4	Alive	7.1	0
TCGA-BH-A0B2-01A	TCGA-BH-A0B2-01A	12.8
Total 1283; out of which
179 samples are
duplicated;
Out of this duplication
6 samples - triplicated
173 samples -duplicated
6 x 2 =12
173 x 1 = 173
Total 185
1283-185=1098 (TCGA)
Duplicates Removed
Xena Star Values
Cbioportal-rest

## Sheet: Lnode-OS-04-12-19-Hi-25%
sample	sample	Star (fkpm+uq+1)	Neoplasm Disease Lymph Node Stage American Joint Committee on Cancer Code	Node - N0=1; N1=2; N2=3; N3 = 4; NX =5	Patient's Vital Status	Overall Survival (Months)	Dead=1; Alive =0
TCGA-A8-A09C-01A	TCGA-A8-A09C-01A		N0	1	Alive	1.02	0
TCGA-E2-A14S-01A	TCGA-E2-A14S-01A		N0	1	Alive	33.15	0
TCGA-AN-A0FL-01A	TCGA-AN-A0FL-01A	9.12	N0	1	Alive	7.59	0
TCGA-AR-A24Z-01A	TCGA-AR-A24Z-01A	9.141	N0	1	Alive	98.59	0
TCGA-D8-A1JG-01B	TCGA-D8-A1JG-01B	9.142	N0	1	Alive	52.96	0
TCGA-D8-A27F-01A	TCGA-D8-A27F-01A	9.184	N0	1	Alive	16.03	0
TCGA-C8-A27B-01A	TCGA-C8-A27B-01A	9.191	N0	1	Alive	14.42	0
TCGA-D8-A1JT-01A	TCGA-D8-A1JT-01A	9.215	N0	1	Alive	13.3	0
TCGA-EW-A1P3-01A	TCGA-EW-A1P3-01A	9.239	N0	1	Alive	52.92	0
TCGA-PE-A5DE-01A	TCGA-PE-A5DE-01A	9.28	N0	1	Alive	86.89	0
TCGA-B6-A1KI-01A	TCGA-B6-A1KI-01A	9.289	N0	1	Alive	73.46	0
TCGA-BH-A0HY-01A	TCGA-BH-A0HY-01A	9.33	N0	1	Alive	50.76	0
TCGA-AC-A5XS-01A	TCGA-AC-A5XS-01A	9.336	N0	1	Alive	19.32	0
TCGA-D8-A143-01A	TCGA-D8-A143-01A	9.338	N0	1	Alive	14.16	0
TCGA-EW-A423-01A	TCGA-EW-A423-01A	9.341	N0	1	Alive	17.51	0
TCGA-A8-A09Z-01A	TCGA-A8-A09Z-01A	9.348	N0	1	Alive	0	0
TCGA-D8-A142-01A	TCGA-D8-A142-01A	9.369	N0	1	Alive	13.96	0
TCGA-C8-A1HF-01A	TCGA-C8-A1HF-01A	9.372	N0	1	Alive	10.91	0
TCGA-A8-A08C-01A	TCGA-A8-A08C-01A	9.377	N0	1	Alive	28.94	0
TCGA-AQ-A54O-01A	TCGA-AQ-A54O-01A	9.396	N0	1	Alive	32.88	0
TCGA-AR-A250-01A	TCGA-AR-A250-01A	9.409	N0	1	Alive	88.93	0
TCGA-E2-A573-01A	TCGA-E2-A573-01A	9.426	N0	1	Alive	34.89	0
TCGA-E9-A5UP-01A	TCGA-E9-A5UP-01A	9.465	N0	1	Alive	26.38	0
TCGA-A8-A094-01A	TCGA-A8-A094-01A	9.466	N0	1	Alive	0	0
TCGA-AN-A049-01A	TCGA-AN-A049-01A	9.483	N0	1	Alive	0.62	0
TCGA-D8-A27P-01A	TCGA-D8-A27P-01A	9.521	N0	1	Alive	1.61	0
TCGA-E2-A1IN-01A	TCGA-E2-A1IN-01A	9.527	N0	1	Alive	22.17	0
TCGA-A8-A06N-01A	TCGA-A8-A06N-01A	9.534	N0	1	Alive	0	0
TCGA-A8-A07C-01A	TCGA-A8-A07C-01A	9.551	N0	1	Alive	33.97	0
TCGA-A7-A3RF-01A	TCGA-A7-A3RF-01A	9.555	N0	1	Alive	13.4	0
TCGA-BH-A0AV-01A	TCGA-BH-A0AV-01A	9.556	N0	1	Alive	59.79	0
TCGA-AN-A0AM-01A	TCGA-AN-A0AM-01A	9.557	N0	1	Alive	0.16	0
TCGA-A7-A3IY-01A	TCGA-A7-A3IY-01A	9.594	N0	1	Alive	11.33	0
TCGA-LL-A50Y-01A	TCGA-LL-A50Y-01A	9.6	N0	1	Alive	25.03	0
TCGA-D8-A1JP-01A	TCGA-D8-A1JP-01A	9.604	N0	1	Alive	20.99	0
TCGA-AO-A1KR-01A	TCGA-AO-A1KR-01A	9.611	N0	1	Alive	82.56	0
TCGA-E9-A22B-01A	TCGA-E9-A22B-01A	9.628	N0	1	Alive	38.34	0
TCGA-AN-A0AL-01A	TCGA-AN-A0AL-01A	9.633	N0	1	Alive	7.46	0
TCGA-AN-A0FD-01A	TCGA-AN-A0FD-01A	9.636	N0	1	Alive	6.44	0
TCGA-AN-A0FF-01A	TCGA-AN-A0FF-01A	9.636	N0	1	Alive	5.65	0
TCGA-PE-A5DD-01A	TCGA-PE-A5DD-01A	9.685	N0	1	Alive	64.16	0
TCGA-D8-A27H-01A	TCGA-D8-A27H-01A	9.689	N0	1	Alive	13.04	0
TCGA-AN-A0FV-01A	TCGA-AN-A0FV-01A	9.707	N0	1	Alive	0.33	0
TCGA-BH-A0BR-01A	TCGA-BH-A0BR-01A	9.711	N0	1	Alive	76.54	0
TCGA-A8-A0A1-01A	TCGA-A8-A0A1-01A	9.713	N0	1	Alive	11.99	0
TCGA-AC-A3TN-01A	TCGA-AC-A3TN-01A	9.719	N0	1	Alive	14.98	0
TCGA-AC-A62X-01A	TCGA-AC-A62X-01A	9.725	N0	1	Alive	13.7	0
TCGA-A8-A090-01A	TCGA-A8-A090-01A	9.727	N0	1	Alive	0	0
TCGA-D8-A27V-01A	TCGA-D8-A27V-01A	9.73	N0	1	Alive	12.52	0
TCGA-E2-A15M-01A	TCGA-E2-A15M-01A	9.736	N0	1	Dead	11.04	1
TCGA-E9-A1NA-01A	TCGA-E9-A1NA-01A	9.76	N0	1	Alive	36.53	0
TCGA-A8-A07Z-01A	TCGA-A8-A07Z-01A	9.763	N0	1	Alive	45.04	0
TCGA-E2-A1BC-01A	TCGA-E2-A1BC-01A	9.771	N0	1	Alive	16.46	0
TCGA-D8-A147-01A	TCGA-D8-A147-01A	9.773	N0	1	Alive	19.19	0
TCGA-AR-A0TY-01A	TCGA-AR-A0TY-01A	9.806	N0	1	Dead	55.81	1
TCGA-D8-A1XU-01A	TCGA-D8-A1XU-01A	9.832	N0	1	Alive	12.98	0
TCGA-AN-A0FN-01A	TCGA-AN-A0FN-01A	9.84	N0	1	Alive	7.16	0
TCGA-AC-A4ZE-01A	TCGA-AC-A4ZE-01A	9.859	N0	1	Alive	29.24	0
TCGA-BH-A202-01A	TCGA-BH-A202-01A	9.864	N0	1	Alive	26.12	0
TCGA-AR-A24H-01A	TCGA-AR-A24H-01A	9.88	N0	1	Alive	160.78	0
TCGA-D8-A4Z1-01A	TCGA-D8-A4Z1-01A	9.912	N0	1	Alive	21.65	0
TCGA-E2-A15T-01A	TCGA-E2-A15T-01A	9.922	N0	1	Alive	51.35	0
TCGA-D8-A1XM-01A	TCGA-D8-A1XM-01A	9.928	N0	1	Alive	17.67	0
TCGA-GI-A2C8-01A	TCGA-GI-A2C8-01A	9.938	N0	1	Alive	7.39	0
TCGA-BH-A0DO-01B	TCGA-BH-A0DO-01B	9.941	N0	1	Alive	54.01	0
TCGA-AC-A3W5-01A	TCGA-AC-A3W5-01A	9.942	N0	1	Alive	16.56	0
TCGA-AN-A0XL-01A	TCGA-AN-A0XL-01A	9.948	N0	1	Alive	5.35	0
TCGA-E2-A14Z-01A	TCGA-E2-A14Z-01A	9.948	N0	1	Dead	18.5	1
TCGA-A8-A09V-01A	TCGA-A8-A09V-01A	9.967	N0	1	Alive	15.01	0
TCGA-OL-A5D6-01A	TCGA-OL-A5D6-01A	9.968	N0	1	Dead	36.27	1
TCGA-AN-A0AK-01A	TCGA-AN-A0AK-01A	9.977	N0	1	Alive	7.36	0
TCGA-BH-A18H-01A	TCGA-BH-A18H-01A	9.982	N0	1	Alive	21.42	0
TCGA-UL-AAZ6-01A	TCGA-UL-AAZ6-01A	9.983	N0	1	Alive	17.02	0
TCGA-D8-A146-01A	TCGA-D8-A146-01A	9.984	N0	1	Alive	21.12	0
TCGA-B6-A2IU-01A	TCGA-B6-A2IU-01A	9.985	N0	1	Alive	170.04	0
TCGA-XX-A89A-01A	TCGA-XX-A89A-01A	9.987	N0	1	Alive	16.03	0
TCGA-E9-A229-01A	TCGA-E9-A229-01A	9.995	N0	1	Alive	37.71	0
TCGA-E2-A1IJ-01A	TCGA-E2-A1IJ-01A	9.998	N0	1	Alive	28.42	0
TCGA-BH-A18P-01A	TCGA-BH-A18P-01A	10.01	N0	1	Dead	30.26	1
TCGA-A7-A6VV-01A	TCGA-A7-A6VV-01A	10.02	N0	1	Alive	10.28	0
TCGA-AN-A0AT-01A	TCGA-AN-A0AT-01A	10.02	N0	1	Alive	0.33	0
TCGA-D8-A27M-01A	TCGA-D8-A27M-01A	10.02	N0	1	Alive	13.47	0
TCGA-E2-A14R-01A	TCGA-E2-A14R-01A	10.03	N0	1	Alive	38.57	0
TCGA-D8-A73X-01A	TCGA-D8-A73X-01A	10.04	N0	1	Alive	25.2	0
TCGA-C8-A26Z-01A	TCGA-C8-A26Z-01A	10.05	N0	1	Alive	15.44	0
TCGA-E9-A1R7-01A	TCGA-E9-A1R7-01A	10.06	N0	1	Alive	48.19	0
TCGA-BH-A0AU-01A	TCGA-BH-A0AU-01A	10.07	N0	1	Alive	62.88	0
TCGA-E2-A1IO-01A	TCGA-E2-A1IO-01A	10.07	N0	1	Alive	60.94	0
TCGA-E2-A14Y-01A	TCGA-E2-A14Y-01A	10.1	N0	1	Alive	69.28	0
TCGA-OL-A66L-01A	TCGA-OL-A66L-01A	10.11	N0	1	Alive	42.74	0
TCGA-AR-A5QM-01A	TCGA-AR-A5QM-01A	10.12	N0	1	Alive	73.29	0
TCGA-OL-A6VO-01A	TCGA-OL-A6VO-01A	10.12	N0	1	Alive	28.19	0
TCGA-E2-A1LS-01A	TCGA-E2-A1LS-01A	10.15	N0	1	Alive	52.69	0
TCGA-AN-A046-01A	TCGA-AN-A046-01A	10.16	N0	1	Alive	0.33	0
TCGA-5L-AAT0-01A	TCGA-5L-AAT0-01A	10.17	N0	1	Alive	48.52	0
TCGA-A8-A09I-01A	TCGA-A8-A09I-01A	10.17	N0	1	Alive	45.04	0
TCGA-AR-A1AK-01A	TCGA-AR-A1AK-01A	10.18	N0	1	Alive	103.78	0
TCGA-A8-A093-01A	TCGA-A8-A093-01A	10.2	N0	1	Alive	17.94	0
TCGA-E2-A576-01A	TCGA-E2-A576-01A	10.22	N0	1	Alive	34.26	0
TCGA-A7-A26J-01A	TCGA-A7-A26J-01A	10.27	N0	1	Alive	20.6	0
TCGA-A8-A0A2-01A	TCGA-A8-A0A2-01A	10.27	N0	1	Alive	19.02	0
TCGA-C8-A3M7-01A	TCGA-C8-A3M7-01A	10.27	N0	1	Dead	33.97	1
TCGA-D8-A1XA-01A	TCGA-D8-A1XA-01A	10.27	N0	1	Alive	27.56	0
TCGA-EW-A1J3-01A	TCGA-EW-A1J3-01A	10.27	N0	1	Alive	16.56	0
TCGA-E9-A1R6-01A	TCGA-E9-A1R6-01A	10.29	N0	1	Alive	11.14	0
TCGA-BH-A0BP-01A	TCGA-BH-A0BP-01A	10.3	N0	1	Dead	75.43	1
TCGA-A8-A091-01A	TCGA-A8-A091-01A	10.31	N0	1	Alive	32.98	0
TCGA-AC-A7VC-01A	TCGA-AC-A7VC-01A	10.31	N0	1	Alive	0.03	0
TCGA-D8-A1JH-01A	TCGA-D8-A1JH-01A	10.33	N0	1	Alive	13.99	0
TCGA-AR-A2LR-01A	TCGA-AR-A2LR-01A	10.34	N0	1	Alive	57.23	0
TCGA-BH-A1FU-01A	TCGA-BH-A1FU-01A	10.36	N0	1	Dead	55.45	1
TCGA-BH-A18F-01A	TCGA-BH-A18F-01A	10.38	N0	1	Alive	32.88	0
TCGA-AR-A252-01A	TCGA-AR-A252-01A	10.39	N0	1	Alive	93.23	0
TCGA-D8-A1J9-01A	TCGA-D8-A1J9-01A	10.39	N0	1	Alive	17.48	0
TCGA-EW-A1PF-01A	TCGA-EW-A1PF-01A	10.4	N0	1	Alive	14.42	0
TCGA-AN-A0FX-01A	TCGA-AN-A0FX-01A	10.41	N0	1	Alive	0.33	0
TCGA-OL-A5DA-01A	TCGA-OL-A5DA-01A	10.41	N0	1	Alive	58.57	0
TCGA-A8-A0A4-01A	TCGA-A8-A0A4-01A	10.42	N0	1	Alive	13.01	0
TCGA-EW-A3E8-01B	TCGA-EW-A3E8-01B	10.42	N0	1	Alive	34	0
TCGA-BH-A0C3-01A	TCGA-BH-A0C3-01A	10.43	N0	1	Alive	88.99	0
TCGA-E2-A1IF-01A	TCGA-E2-A1IF-01A	10.43	N0	1	Alive	37.39	0
TCGA-AR-A2LQ-01A	TCGA-AR-A2LQ-01A	10.44	N0	1	Alive	40.51	0
TCGA-C8-A1HN-01A	TCGA-C8-A1HN-01A	10.5	N0	1	Alive	12.94	0
TCGA-AR-A256-01A	TCGA-AR-A256-01A	10.54	N0	1	Dead	93.76	1
TCGA-OL-A66P-01A	TCGA-OL-A66P-01A	10.54	N0	1	Alive	14.06	0
TCGA-S3-AA11-01A	TCGA-S3-AA11-01A	10.54	N0	1	Alive	13.83	0
TCGA-BH-A201-01A	TCGA-BH-A201-01A	10.55	N0	1	Alive	28.12	0
TCGA-AR-A0TU-01A	TCGA-AR-A0TU-01A	10.56	N0	1	Alive	23.29	0
TCGA-A7-A3J1-01A	TCGA-A7-A3J1-01A	10.58	N0	1	Alive	11.27	0
TCGA-AR-A255-01A	TCGA-AR-A255-01A	10.58	N0	1	Alive	70.99	0
TCGA-BH-A1EU-01A	TCGA-BH-A1EU-01A	10.6	N0	1	Dead	42.25	1
TCGA-A7-A4SC-01A	TCGA-A7-A4SC-01A	10.6	N0	1	Alive	14.65	0
TCGA-OL-A6VR-01A	TCGA-OL-A6VR-01A	10.61	N0	1	Alive	40.08	0
TCGA-BH-A0BL-01A	TCGA-BH-A0BL-01A	10.63	N0	1	Alive	74.84	0
TCGA-E2-A159-01A	TCGA-E2-A159-01A	10.64	N0	1	Alive	25.03	0
TCGA-HN-A2NL-01A	TCGA-HN-A2NL-01A	10.65	N0	1	Alive	2.6	0
TCGA-A8-A06O-01A	TCGA-A8-A06O-01A	10.66	N0	1	Alive	13.01	0
TCGA-E2-A574-01A	TCGA-E2-A574-01A	10.67	N0	1	Alive	38.73	0
TCGA-AR-A1AT-01A	TCGA-AR-A1AT-01A	10.69	N0	1	Dead	41.79	1
TCGA-OL-A5RZ-01A	TCGA-OL-A5RZ-01A	10.71	N0	1	Alive	22.31	0
TCGA-A8-A08B-01A	TCGA-A8-A08B-01A	10.73	N0	1	Alive	37.98	0
TCGA-E9-A22D-01A	TCGA-E9-A22D-01A	10.73	N0	1	Alive	41	0
TCGA-BH-A0DG-01A	TCGA-BH-A0DG-01A	10.75	N0	1	Alive	67.05	0
TCGA-BH-A0DE-01A	TCGA-BH-A0DE-01A	10.79	N0	1	Alive	77.92	0
TCGA-A8-A076-01A	TCGA-A8-A076-01A	10.8	N0	1	Alive	53.94	0
TCGA-C8-A1HJ-01A	TCGA-C8-A1HJ-01A	10.8	N0	1	Alive	0.16	0
TCGA-E2-A1IH-01A	TCGA-E2-A1IH-01A	10.8	N0	1	Alive	33.71	0
TCGA-A8-A083-01A	TCGA-A8-A083-01A	10.81	N0	1	Alive	0	0
TCGA-E2-A14T-01A	TCGA-E2-A14T-01A	10.81	N0	1	Alive	75.92	0
TCGA-A1-A0SB-01A	TCGA-A1-A0SB-01A	10.83	N0	1	Alive	8.51	0
TCGA-AC-A2QH-01B	TCGA-AC-A2QH-01B	10.85	N0	1	Alive	33.02	0
TCGA-C8-A1HG-01A	TCGA-C8-A1HG-01A	10.89	N0	1	Alive	11.33	0
TCGA-D8-A1Y2-01A	TCGA-D8-A1Y2-01A	10.9	N0	1	Alive	14.22	0
TCGA-BH-A0BW-01A	TCGA-BH-A0BW-01A	10.91	N0	1	Alive	77.89	0
TCGA-BH-A0BO-01A	TCGA-BH-A0BO-01A	10.94	N0	1	Alive	72.17	0
TCGA-A8-A0AB-01A	TCGA-A8-A0AB-01A	10.97	N0	1	Alive	17.02	0
TCGA-C8-A26Y-01A	TCGA-C8-A26Y-01A	10.97	N0	1	Alive	12.94	0
TCGA-E2-A15P-01A	TCGA-E2-A15P-01A	10.98	N0	1	Alive	19.55	0
TCGA-OL-A5D8-01A	TCGA-OL-A5D8-01A	10.98	N0	1	Alive	31.96	0
TCGA-A7-A5ZV-01A	TCGA-A7-A5ZV-01A	11	N0	1	Alive	12.09	0
TCGA-AQ-A54N-01A	TCGA-AQ-A54N-01A	11	N0	1	Alive	2.56	0
TCGA-BH-A6R9-01A	TCGA-BH-A6R9-01A	11.01	N0	1	Alive	5.26	0
TCGA-A8-A095-01A	TCGA-A8-A095-01A	11.07	N0	1	Alive	41.95	0
TCGA-E9-A1QZ-01A	TCGA-E9-A1QZ-01A	11.08	N0	1	Alive	24.8	0
TCGA-A8-A08I-01A	TCGA-A8-A08I-01A	11.09	N0	1	Alive	11.99	0
TCGA-A8-A08G-01A	TCGA-A8-A08G-01A	11.14	N0	1	Alive	19.94	0
TCGA-E2-A15C-01A	TCGA-E2-A15C-01A	11.14	N0	1	Alive	22.8	0
TCGA-LL-A73Y-01A	TCGA-LL-A73Y-01A	11.16	N0	1	Alive	15.67	0
TCGA-A2-A3XZ-01A	TCGA-A2-A3XZ-01A	11.17	N0	1	Alive	50.33	0
TCGA-E2-A150-01A	TCGA-E2-A150-01A	11.17	N0	1	Alive	63.57	0
TCGA-AC-A2FB-01A	TCGA-AC-A2FB-01A	11.18	N0	1	Alive	40.54	0
TCGA-A1-A0SF-01A	TCGA-A1-A0SF-01A	11.2	N0	1	Alive	48.06	0
TCGA-AR-A1AP-01A	TCGA-AR-A1AP-01A	11.21	N0	1	Alive	93.82	0
TCGA-C8-A1HM-01A	TCGA-C8-A1HM-01A	11.23	N0	1	Alive	12.32	0
TCGA-BH-A0B0-01A	TCGA-BH-A0B0-01A	11.24	N0	1	Alive	81.37	0
TCGA-JL-A3YX-01A	TCGA-JL-A3YX-01A	11.24	N0	1	Alive	11.56	0
TCGA-BH-A0DX-01A	TCGA-BH-A0DX-01A	11.26	N0	1	Alive	70.83	0
TCGA-AR-A24N-01A	TCGA-AR-A24N-01A	11.28	N0	1	Alive	99.7	0
TCGA-D8-A1XF-01A	TCGA-D8-A1XF-01A	11.32	N0	1	Alive	15.21	0
TCGA-BH-A0H3-01A	TCGA-BH-A0H3-01A	11.33	N0	1	Alive	63.34	0
TCGA-AR-A1AX-01A	TCGA-AR-A1AX-01A	11.37	N0	1	Alive	86.37	0
TCGA-E2-A1B5-01A	TCGA-E2-A1B5-01A	11.37	N0	1	Alive	32.33	0
TCGA-PL-A8LV-01A	TCGA-PL-A8LV-01A	11.37	N0	1	Alive	-0.23	0
TCGA-S3-AA10-01A	TCGA-S3-AA10-01A	11.38	N0	1	Alive	19.25	0
TCGA-A2-A4RX-01A	TCGA-A2-A4RX-01A	11.42	N0	1	Alive	24.38	0
TCGA-A7-A6VX-01A	TCGA-A7-A6VX-01A	11.42	N0	1	Alive	10.41	0
TCGA-GI-A2C9-01A	TCGA-GI-A2C9-01A	11.49	N0	1	Alive	109.79	0
TCGA-BH-A0BG-01A	TCGA-BH-A0BG-01A	11.56	N0	1	Alive	61.47	0
TCGA-E2-A14U-01A	TCGA-E2-A14U-01A	11.56	N0	1	Alive	43.3	0
TCGA-E9-A1N8-01A	TCGA-E9-A1N8-01A	11.59	N0	1	Alive	34.13	0
TCGA-BH-A8FZ-01A	TCGA-BH-A8FZ-01A	11.66	N0	1	Alive	18.86	0
TCGA-LD-A9QF-01A	TCGA-LD-A9QF-01A	11.67	N0	1	Alive	10.61	0
TCGA-AN-A0AJ-01A	TCGA-AN-A0AJ-01A	11.7	N0	1	Alive	9.95	0
TCGA-BH-A42U-01A	TCGA-BH-A42U-01A	11.7	N0	1	Alive	110.51	0
TCGA-BH-A1FD-01A	TCGA-BH-A1FD-01A	11.77	N0	1	Dead	33.15	1
TCGA-OL-A6VQ-01A	TCGA-OL-A6VQ-01A	11.77	N0	1	Alive	19.71	0
TCGA-AR-A24P-01A	TCGA-AR-A24P-01A	11.78	N0	1	Alive	2.76	0
TCGA-D8-A1JL-01A	TCGA-D8-A1JL-01A	11.81	N0	1	Alive	20.07	0
TCGA-AR-A2LN-01A	TCGA-AR-A2LN-01A	11.85	N0	1	Alive	38.14	0
TCGA-C8-A3M8-01A	TCGA-C8-A3M8-01A	11.85	N0	1	Alive	12.94	0
TCGA-OL-A5RX-01A	TCGA-OL-A5RX-01A	11.86	N0	1	Alive	28.84	0
TCGA-LL-A5YO-01A	TCGA-LL-A5YO-01A	11.89	N0	1	Alive	14.45	0
TCGA-BH-A0B6-01A	TCGA-BH-A0B6-01A	11.92	N0	1	Alive	81.57	0
TCGA-E9-A22A-01A	TCGA-E9-A22A-01A	11.92	N0	1	Alive	39.06	0
TCGA-E2-A1LH-01A	TCGA-E2-A1LH-01A	11.93	N0	1	Alive	106.67	0
TCGA-PL-A8LY-01A	TCGA-PL-A8LY-01A	11.93	N0	1	Alive	0.26	0
TCGA-BH-A0DL-01A	TCGA-BH-A0DL-01A	11.96	N0	1	Alive	78.22	0
TCGA-A2-A0CO-01A	TCGA-A2-A0CO-01A	11.98	N0	1	Dead	114.72	1
TCGA-AC-A2QJ-01A	TCGA-AC-A2QJ-01A	12.02	N0	1	Dead	14.65	1
TCGA-BH-A209-01A	TCGA-BH-A209-01A	12.04	N0	1	Dead	130.06	1
TCGA-LL-A441-01A	TCGA-LL-A441-01A	12.1	N0	1	Alive	32.72	0
TCGA-EW-A6SB-01A	TCGA-EW-A6SB-01A	12.13	N0	1	Alive	24.97	0
TCGA-E9-A1RB-01A	TCGA-E9-A1RB-01A	12.19	N0	1	Dead	32.06	1
TCGA-A7-A6VW-01A	TCGA-A7-A6VW-01A	12.21	N0	1	Alive	9.36	0
TCGA-E2-A1BD-01A	TCGA-E2-A1BD-01A	12.25	N0	1	Alive	37.22	0
TCGA-E9-A1RA-01A	TCGA-E9-A1RA-01A	12.31	N0	1	Alive	44.97	0
TCGA-AR-A1AQ-01A	TCGA-AR-A1AQ-01A	12.36	N0	1	Alive	99.24	0
TCGA-A2-A0CR-01A	TCGA-A2-A0CR-01A	12.5	N0	1	Alive	107.85	0
TCGA-E9-A5FL-01A	TCGA-E9-A5FL-01A	12.57	N0	1	Alive	0.79	0
TCGA-AR-A1AW-01A	TCGA-AR-A1AW-01A	12.58	N0	1	Alive	86.47	0
TCGA-E2-A15F-01A	TCGA-E2-A15F-01A	12.61	N0	1	Alive	21.62	0
TCGA-AR-A1AY-01A	TCGA-AR-A1AY-01A	12.7	N0	1	Alive	33.71	0
TCGA-A8-A08H-01A	TCGA-A8-A08H-01A	12.78	N0	1	Alive	0	0
TCGA-BH-A0BQ-01A	TCGA-BH-A0BQ-01A	12.81	N0	1	Alive	74.08	0
TCGA-C8-A12V-01A	TCGA-C8-A12V-01A	12.83	N0	1	Alive	12.65	0
TCGA-A8-A07O-01A	TCGA-A8-A07O-01A	12.85	N0	1	Alive	9.99	0
TCGA-E2-A15I-01A	TCGA-E2-A15I-01A	12.91	N0	1	Alive	55.58	0
TCGA-OL-A66J-01A	TCGA-OL-A66J-01A	12.95	N0	1	Alive	65.57	0
TCGA-E9-A1NI-01A	TCGA-E9-A1NI-01A	13.11	N0	1	Alive	9.86	0
TCGA-AR-A1AJ-01A	TCGA-AR-A1AJ-01A	13.16	N0	1	Alive	100.92	0
TCGA-A7-A26F-01B	TCGA-A7-A26F-01B	13.24	N0	1	Alive	24.24	0
TCGA-EW-A1IY-01A	TCGA-EW-A1IY-01A	13.26	N0	1	Alive	8.48	0
TCGA-A8-A081-01A	TCGA-A8-A081-01A	13.4	N0	1	Alive	0	0
TCGA-C8-A134-01A	TCGA-C8-A134-01A	13.4	N0	1	Alive	12.58	0
TCGA-A7-A4SD-01A	TCGA-A7-A4SD-01A	13.55	N0	1	Alive	14.49	0
TCGA-5L-AAT1-01A	TCGA-5L-AAT1-01A	13.57	N0	1	Alive	48.32	0
TCGA-E2-A15D-01A	TCGA-E2-A15D-01A	13.69	N0	1	Alive	17.28	0
TCGA-OL-A97C-01A	TCGA-OL-A97C-01A	13.73	N0	1	Alive	8.9	0
TCGA-E2-A154-01A	TCGA-E2-A154-01A	13.78	N0	1	Alive	19.42	0
TCGA-BH-A1EY-01A	TCGA-BH-A1EY-01A	13.93	N0	1	Dead	17.67	1
TCGA-E9-A22G-01A	TCGA-E9-A22G-01A	13.93	N0	1	Alive	40.7	0
TCGA-A7-A13G-01B	TCGA-A7-A13G-01B	13.95	N0	1	Alive	23.59	0
TCGA-A7-A26I-01B	TCGA-A7-A26I-01B	14.01	N0	1	Alive	21.71	0
TCGA-S3-A6ZF-01A	TCGA-S3-A6ZF-01A	14.37	N0	1	Alive	18.79	0
TCGA-BH-A18T-01A	TCGA-BH-A18T-01A	14.73	N0	1	Dead	7.36	1
TCGA-E2-A1B6-01A	TCGA-E2-A1B6-01A	14.83	N0	1	Alive	28.48	0
TCGA-AR-A1AI-01A	TCGA-AR-A1AI-01A	14.93	N0	1	Alive	108.28	0
TCGA-OL-A5D7-01A	TCGA-OL-A5D7-01A	15.73	N0	1	Alive	58.48	0
TCGA-AR-A0U4-01A	TCGA-AR-A0U4-01A	15.76	N0	1	Alive	107.13	0
TCGA-E2-A1II-01A	TCGA-E2-A1II-01A	16.83	N0	1	Alive	33.67	0
TCGA-A7-A0DA-01A	TCGA-A7-A0DA-01A	9.125	N0 (i-)	1	Alive	35.64	0
TCGA-BH-A0HN-01A	TCGA-BH-A0HN-01A	9.186	N0 (i-)	1	Alive	16.95	0
TCGA-E9-A248-01A	TCGA-E9-A248-01A	9.23	N0 (i-)	1	Alive	1.94	0
TCGA-LL-A8F5-01A	TCGA-LL-A8F5-01A	9.23	N0 (i-)	1	Alive	19.58	0
TCGA-A1-A0SH-01A	TCGA-A1-A0SH-01A	9.275	N0 (i-)	1	Alive	47.21	0
TCGA-AO-A03O-01A	TCGA-AO-A03O-01A	9.306	N0 (i-)	1	Dead	81.57	1
TCGA-B6-A0IO-01A	TCGA-B6-A0IO-01A	9.307	N0 (i-)	1	Alive	165.64	0
TCGA-E9-A244-01A	TCGA-E9-A244-01A	9.336	N0 (i-)	1	Alive	0.69	0
TCGA-A7-A13D-01A	TCGA-A7-A13D-01A	9.432	N0 (i-)	1	Alive	31.7	0
TCGA-BH-A0HI-01A	TCGA-BH-A0HI-01A	9.467	N0 (i-)	1	Alive	20.37	0
TCGA-E9-A247-01A	TCGA-E9-A247-01A	9.473	N0 (i-)	1	Alive	38.96	0
TCGA-A2-A0CT-01A	TCGA-A2-A0CT-01A	9.49	N0 (i-)	1	Alive	75.2	0
TCGA-WT-AB44-01A	TCGA-WT-AB44-01A	9.503	N0 (i-)	1	Alive	29.01	0
TCGA-AO-A0J2-01A	TCGA-AO-A0J2-01A	9.516	N0 (i-)	1	Alive	32.75	0
TCGA-AO-A03V-01A	TCGA-AO-A03V-01A	9.517	N0 (i-)	1	Alive	44.38	0
TCGA-BH-A0H9-01A	TCGA-BH-A0H9-01A	9.577	N0 (i-)	1	Alive	40.97	0
TCGA-GM-A2DK-01A	TCGA-GM-A2DK-01A	9.592	N0 (i-)	1	Alive	86.89	0
TCGA-GM-A2DM-01A	TCGA-GM-A2DM-01A	9.593	N0 (i-)	1	Alive	105.98	0
TCGA-AC-A5XU-01A	TCGA-AC-A5XU-01A	9.597	N0 (i-)	1	Alive	14.95	0
TCGA-LL-A740-01A	TCGA-LL-A740-01A	9.638	N0 (i-)	1	Alive	14.49	0
TCGA-A2-A0EM-01A	TCGA-A2-A0EM-01A	9.645	N0 (i-)	1	Alive	101.64	0
TCGA-E2-A109-01A	TCGA-E2-A109-01A	9.716	N0 (i-)	1	Alive	46.55	0
TCGA-E2-A10F-01A	TCGA-E2-A10F-01A	9.782	N0 (i-)	1	Alive	28.84	0
TCGA-EW-A1OZ-01A	TCGA-EW-A1OZ-01A	9.784	N0 (i-)	1	Alive	40.37	0
TCGA-A2-A0EO-01A	TCGA-A2-A0EO-01A	9.808	N0 (i-)	1	Alive	80.22	0
TCGA-LL-A6FR-01A	TCGA-LL-A6FR-01A	9.888	N0 (i-)	1	Alive	16.06	0
TCGA-W8-A86G-01A	TCGA-W8-A86G-01A	9.99	N0 (i-)	1	Alive	11.4	0
TCGA-E2-A10A-01A	TCGA-E2-A10A-01A	10.02	N0 (i-)	1	Alive	40.37	0
TCGA-B6-A0RN-01A	TCGA-B6-A0RN-01A	10.04	N0 (i-)	1	Alive	263.07	0
TCGA-A2-A0CP-01A	TCGA-A2-A0CP-01A	10.12	N0 (i-)	1	Alive	92.41	0
TCGA-AO-A1KS-01A	TCGA-AO-A1KS-01A	10.13	N0 (i-)	1	Alive	11.5	0
TCGA-A2-A0CX-01A	TCGA-A2-A0CX-01A	10.14	N0 (i-)	1	Alive	56.77	0
TCGA-BH-A0EE-01A	TCGA-BH-A0EE-01A	10.15	N0 (i-)	1	Alive	30.98	0
TCGA-A2-A04X-01A	TCGA-A2-A04X-01A	10.18	N0 (i-)	1	Alive	55.39	0
TCGA-B6-A0RG-01A	TCGA-B6-A0RG-01A	10.19	N0 (i-)	1	Alive	68.4	0
TCGA-A2-A0SX-01A	TCGA-A2-A0SX-01A	10.22	N0 (i-)	1	Alive	50.39	0
TCGA-A7-A0CG-01A	TCGA-A7-A0CG-01A	10.32	N0 (i-)	1	Alive	34.26	0
TCGA-B6-A0IM-01A	TCGA-B6-A0IM-01A	10.38	N0 (i-)	1	Dead	127.23	1
TCGA-AR-A0U1-01A	TCGA-AR-A0U1-01A		N1	2	Alive	133.11	0
TCGA-GM-A2D9-01A	TCGA-GM-A2D9-01A	10.46	N0 (i-)	1	Dead	59.53	1
TCGA-C8-A12O-01A	TCGA-C8-A12O-01A	10.48	N0 (i-)	1	Alive	12.65	0
TCGA-AO-A124-01A	TCGA-AO-A124-01A	10.49	N0 (i-)	1	Alive	115.18	0
TCGA-B6-A0RQ-01A	TCGA-B6-A0RQ-01A	10.5	N0 (i-)	1	Dead	140.18	1
TCGA-A2-A04V-01A	TCGA-A2-A04V-01A	10.52	N0 (i-)	1	Dead	63.07	1
TCGA-EW-A1J6-01A	TCGA-EW-A1J6-01A	10.52	N0 (i-)	1	Alive	28.75	0
TCGA-C8-A12N-01A	TCGA-C8-A12N-01A	10.56	N0 (i-)	1	Alive	11.76	0
TCGA-A2-A0T6-01A	TCGA-A2-A0T6-01A	10.63	N0 (i-)	1	Alive	18.89	0
TCGA-GM-A2DD-01A	TCGA-GM-A2DD-01A	10.63	N0 (i-)	1	Alive	74.97	0
TCGA-EW-A1P4-01A	TCGA-EW-A1P4-01A	10.65	N0 (i-)	1	Alive	29.8	0
TCGA-BH-A0W4-01A	TCGA-BH-A0W4-01A	10.7	N0 (i-)	1	Alive	24.93	0
TCGA-EW-A1PC-01B	TCGA-EW-A1PC-01B	10.72	N0 (i-)	1	Alive	6.14	0
TCGA-A7-A0CJ-01A	TCGA-A7-A0CJ-01A	10.73	N0 (i-)	1	Alive	30.58	0
TCGA-A2-A0EU-01A	TCGA-A2-A0EU-01A	10.74	N0 (i-)	1	Alive	34.26	0
TCGA-AQ-A04L-01B	TCGA-AQ-A04L-01B	10.79	N0 (i-)	1	Alive	129.99	0
TCGA-AC-A8OP-01A	TCGA-AC-A8OP-01A	10.83	N0 (i-)	1	Alive	20.17	0
TCGA-A2-A25A-01A	TCGA-A2-A25A-01A	10.87	N0 (i-)	1	Alive	107.62	0
TCGA-AO-A03M-01B	TCGA-AO-A03M-01B	10.88	N0 (i-)	1	Alive	61.3	0
TCGA-A2-A0D3-01A	TCGA-A2-A0D3-01A	10.9	N0 (i-)	1	Alive	61.53	0
TCGA-BH-A0HA-01A	TCGA-BH-A0HA-01A	10.9	N0 (i-)	1	Alive	52.92	0
TCGA-BH-A0HB-01A	TCGA-BH-A0HB-01A	10.9	N0 (i-)	1	Alive	26.48	0
TCGA-BH-A0HW-01A	TCGA-BH-A0HW-01A	10.9	N0 (i-)	1	Alive	51.28	0
TCGA-EW-A1J5-01A	TCGA-EW-A1J5-01A	10.9	N0 (i-)	1	Alive	15.67	0
TCGA-A7-A0CE-01A	TCGA-A7-A0CE-01A	11	N0 (i-)	1	Alive	35.28	0
TCGA-AO-A0J4-01A	TCGA-AO-A0J4-01A	11.06	N0 (i-)	1	Alive	52.14	0
TCGA-A2-A0CQ-01A	TCGA-A2-A0CQ-01A	11.2	N0 (i-)	1	Alive	88.53	0
TCGA-AC-A8OS-01A	TCGA-AC-A8OS-01A	11.2	N0 (i-)	1	Alive	2.3	0
TCGA-BH-A0DK-01A	TCGA-BH-A0DK-01A	11.27	N0 (i-)	1	Alive	13.9	0
TCGA-A2-A0CZ-01A	TCGA-A2-A0CZ-01A	11.35	N0 (i-)	1	Alive	53.09	0
TCGA-A2-A259-01A	TCGA-A2-A259-01A	11.36	N0 (i-)	1	Alive	52.43	0
TCGA-BH-A0AY-01A	TCGA-BH-A0AY-01A	11.36	N0 (i-)	1	Alive	25.53	0
TCGA-LL-A440-01A	TCGA-LL-A440-01A	11.44	N0 (i-)	1	Alive	24.93	0
TCGA-BH-A0E6-01A	TCGA-BH-A0E6-01A	11.46	N0 (i-)	1	Alive	9.63	0
TCGA-BH-A0RX-01A	TCGA-BH-A0RX-01A	11.47	N0 (i-)	1	Alive	5.58	0
TCGA-GM-A3NW-01A	TCGA-GM-A3NW-01A	11.52	N0 (i-)	1	Alive	110.41	0
TCGA-B6-A0RH-01A	TCGA-B6-A0RH-01A	11.6	N0 (i-)	1	Dead	212.09	1
TCGA-E9-A3HO-01A	TCGA-E9-A3HO-01A	11.68	N0 (i-)	1	Alive	38.04	0
TCGA-A2-A04N-01A	TCGA-A2-A04N-01A	11.74	N0 (i-)	1	Alive	143.04	0
TCGA-BH-A0HF-01A	TCGA-BH-A0HF-01A	11.76	N0 (i-)	1	Alive	23.88	0
TCGA-E9-A243-01A	TCGA-E9-A243-01A	11.77	N0 (i-)	1	Alive	20.11	0
TCGA-A2-A0D1-01A	TCGA-A2-A0D1-01A	11.82	N0 (i-)	1	Alive	34.53	0
TCGA-A7-A0DB-01A	TCGA-A7-A0DB-01A	11.83	N0 (i-)	1	Alive	33.08	0
TCGA-GM-A2DN-01A	TCGA-GM-A2DN-01A	11.88	N0 (i-)	1	Alive	101.54	0
TCGA-A2-A0ES-01A	TCGA-A2-A0ES-01A	11.89	N0 (i-)	1	Alive	71.94	0
TCGA-GM-A2DB-01A	TCGA-GM-A2DB-01A	12.17	N0 (i-)	1	Alive	79.04	0
TCGA-E9-A295-01A	TCGA-E9-A295-01A	12.2	N0 (i-)	1	Alive	12.32	0
TCGA-BH-A0H5-01A	TCGA-BH-A0H5-01A	12.21	N0 (i-)	1	Alive	53.22	0
TCGA-A1-A0SK-01A	TCGA-A1-A0SK-01A	12.23	N0 (i-)	1	Dead	31.77	1
TCGA-A2-A0T5-01A	TCGA-A2-A0T5-01A	12.3	N0 (i-)	1	Alive	17.44	0
TCGA-GM-A3XL-01A	TCGA-GM-A3XL-01A	12.32	N0 (i-)	1	Alive	69.25	0
TCGA-A2-A04Q-01A	TCGA-A2-A04Q-01A	12.4	N0 (i-)	1	Alive	78.35	0
TCGA-B6-A0RL-01A	TCGA-B6-A0RL-01A	12.49	N0 (i-)	1	Dead	81.11	1
TCGA-C8-A9FZ-01A	TCGA-C8-A9FZ-01A		N1	2	Alive	19.45	0
TCGA-E2-A105-01A	TCGA-E2-A105-01A	12.6	N0 (i-)	1	Alive	42.97	0
TCGA-A7-A0DC-01A	TCGA-A7-A0DC-01A	12.69	N0 (i-)	1	Alive	29.76	0
TCGA-A2-A0YK-01A	TCGA-A2-A0YK-01A	12.73	N0 (i-)	1	Alive	19.32	0
TCGA-BH-A0DP-01A	TCGA-BH-A0DP-01A	12.76	N0 (i-)	1	Alive	15.64	0
TCGA-LL-A5YN-01A	TCGA-LL-A5YN-01A	12.83	N0 (i-)	1	Alive	14.68	0
TCGA-E9-A249-01A	TCGA-E9-A249-01A	13.07	N0 (i-)	1	Alive	7.13	0
TCGA-A7-A0D9-01A	TCGA-A7-A0D9-01A	13.09	N0 (i-)	1	Alive	37.42	0
TCGA-E9-A2JT-01A	TCGA-E9-A2JT-01A	13.1	N0 (i-)	1	Alive	9.46	0
TCGA-A2-A25F-01A	TCGA-A2-A25F-01A	13.19	N0 (i-)	1	Alive	10.58	0
TCGA-A2-A04T-01A	TCGA-A2-A04T-01A	13.24	N0 (i-)	1	Alive	73.78	0
TCGA-EW-A1P7-01A	TCGA-EW-A1P7-01A	13.29	N0 (i-)	1	Alive	30.06	0
TCGA-B6-A40B-01A	TCGA-B6-A40B-01A	13.3	N0 (i-)	1	Alive	103.55	0
TCGA-A2-A0CM-01A	TCGA-A2-A0CM-01A	13.31	N0 (i-)	1	Dead	24.77	1
TCGA-B6-A0IJ-01A	TCGA-B6-A0IJ-01A	13.43	N0 (i-)	1	Alive	233.44	0
TCGA-AC-A3QQ-01B	TCGA-AC-A3QQ-01B	13.45	N0 (i-)	1	Alive	24.11	0
TCGA-AO-A0J6-01A	TCGA-AO-A0J6-01A	13.47	N0 (i-)	1	Alive	37.45	0
TCGA-E9-A3QA-01A	TCGA-E9-A3QA-01A	13.47	N0 (i-)	1	Alive	30.16	0
TCGA-GM-A2DO-01A	TCGA-GM-A2DO-01A	13.48	N0 (i-)	1	Alive	85.28	0
TCGA-AC-A6IW-01A	TCGA-AC-A6IW-01A	13.54	N0 (i-)	1	Alive	13.57	0
TCGA-E9-A245-01A	TCGA-E9-A245-01A	11.14	N1	2	Dead		1
TCGA-B6-A0RE-01A	TCGA-B6-A0RE-01A	13.72	N0 (i-)	1	Alive	255.49	0
TCGA-E9-A54X-01A	TCGA-E9-A54X-01A	13.73	N0 (i-)	1	Alive	23.88	0
TCGA-BH-A0W7-01A	TCGA-BH-A0W7-01A	13.77	N0 (i-)	1	Alive	44.78	0
TCGA-A2-A0EQ-01A	TCGA-A2-A0EQ-01A	13.79	N0 (i-)	1	Alive	79.7	0
TCGA-AO-A0JC-01A	TCGA-AO-A0JC-01A	14.08	N0 (i-)	1	Alive	50.82	0
TCGA-AO-A128-01A	TCGA-AO-A128-01A	14.48	N0 (i-)	1	Alive	106.7	0
TCGA-A1-A0SP-01A	TCGA-A1-A0SP-01A	15.03	N0 (i-)	1	Alive	19.19	0
TCGA-B6-A0I2-01A	TCGA-B6-A0I2-01A	15.1	N0 (i-)	1	Alive	143.27	0
TCGA-BH-A2L8-01A	TCGA-BH-A2L8-01A	15.24	N0 (i-)	1	Alive	20.11	0
TCGA-BH-A0B9-01A	TCGA-BH-A0B9-01A	15.4	N0 (i-)	1	Alive	51.64	0
TCGA-A2-A0YM-01A	TCGA-A2-A0YM-01A	15.48	N0 (i-)	1	Alive	31.7	0
TCGA-A2-A0YD-01A	TCGA-A2-A0YD-01A	9.279	N0 (i+)	1	Alive	25.26	0
TCGA-A2-A0EX-01A	TCGA-A2-A0EX-01A	9.285	N0 (i+)	1	Alive	24.7	0
TCGA-AO-A12E-01A	TCGA-AO-A12E-01A	9.388	N0 (i+)	1	Alive	70.37	0
TCGA-A2-A0SU-01A	TCGA-A2-A0SU-01A	9.532	N0 (i+)	1	Alive	54.6	0
TCGA-A2-A0YI-01A	TCGA-A2-A0YI-01A	9.797	N0 (i+)	1	Alive	49.44	0
TCGA-BH-A8FY-01A	TCGA-BH-A8FY-01A	9.895	N0 (i+)	1	Dead	9.69	1
TCGA-3C-AALK-01A	TCGA-3C-AALK-01A	10.43	N0 (i+)	1	Alive	47.57	0
TCGA-S3-AA14-01A	TCGA-S3-AA14-01A	10.45	N0 (i+)	1	Alive	17.38	0
TCGA-EW-A6SA-01A	TCGA-EW-A6SA-01A	10.72	N0 (i+)	1	Alive	16.75	0
TCGA-A2-A0YF-01A	TCGA-A2-A0YF-01A	10.87	N0 (i+)	1	Alive	50.43	0
TCGA-AO-A1KO-01A	TCGA-AO-A1KO-01A	10.95	N0 (i+)	1	Alive	20.43	0
TCGA-GM-A2DH-01A	TCGA-GM-A2DH-01A	11.08	N0 (i+)	1	Alive	72.04	0
TCGA-A2-A0CU-01A	TCGA-A2-A0CU-01A	11.14	N0 (i+)	1	Dead	5.19	1
TCGA-A2-A0D2-01A	TCGA-A2-A0D2-01A	11.16	N0 (i+)	1	Alive	33.74	0
TCGA-A2-A0EN-01A	TCGA-A2-A0EN-01A	11.18	N0 (i+)	1	Alive	134.3	0
TCGA-AO-A12A-01A	TCGA-AO-A12A-01A	11.3	N0 (i+)	1	Alive	102.23	0
TCGA-AO-A0J8-01A	TCGA-AO-A0J8-01A	11.36	N0 (i+)	1	Alive	22.34	0
TCGA-A2-A0T7-01A	TCGA-A2-A0T7-01A	11.37	N0 (i+)	1	Alive	20.73	0
TCGA-A2-A1FV-01A	TCGA-A2-A1FV-01A	11.37	N0 (i+)	1	Alive	23.46	0
TCGA-A7-A3IZ-01A	TCGA-A7-A3IZ-01A	11.43	N0 (i+)	1	Alive	10.58	0
TCGA-BH-A0HQ-01A	TCGA-BH-A0HQ-01A	11.76	N0 (i+)	1	Alive	36.83	0
TCGA-AQ-A04J-01A	TCGA-AQ-A04J-01A	11.88	N0 (i+)	1	Alive	26.91	0
TCGA-A2-A04U-01A	TCGA-A2-A04U-01A	12.27	N0 (i+)	1	Alive	87.19	0
TCGA-GM-A2DI-01A	TCGA-GM-A2DI-01A	12.5	N0 (i+)	1	Alive	85.09	0
TCGA-A2-A0EP-01A	TCGA-A2-A0EP-01A	12.96	N0 (i+)	1	Alive	118.36	0
TCGA-E2-A1IU-01A	TCGA-E2-A1IU-01A	10.39	N0 (mol+)	1	Alive	11.07	0
TCGA-C8-A8HQ-01A	TCGA-C8-A8HQ-01A	9.122	N1	2	Alive	12.48	0
TCGA-C8-A1HK-01A	TCGA-C8-A1HK-01A	9.159	N1	2	Alive	12.02	0
TCGA-AC-A23E-01A	TCGA-AC-A23E-01A	9.2	N1	2	Alive	22.93	0
TCGA-C8-A12U-01A	TCGA-C8-A12U-01A	9.314	N1	2	Alive	12.65	0
TCGA-AO-A0JM-01A	TCGA-AO-A0JM-01A	9.329	N1	2	Alive	71.75	0
TCGA-C8-A26X-01A	TCGA-C8-A26X-01A	9.345	N1	2	Alive	12.35	0
TCGA-A8-A09D-01A	TCGA-A8-A09D-01A	9.365	N1	2	Alive	50	0
TCGA-AR-A0U0-01A	TCGA-AR-A0U0-01A	9.38	N1	2	Alive	65.31	0
TCGA-BH-A0DQ-01A	TCGA-BH-A0DQ-01A	9.384	N1	2	Alive	3.22	0
TCGA-BH-A0E1-01A	TCGA-BH-A0E1-01A	9.416	N1	2	Alive	15.67	0
TCGA-AR-A24L-01A	TCGA-AR-A24L-01A	9.417	N1	2	Dead	94.15	1
TCGA-A2-A0CY-01A	TCGA-A2-A0CY-01A	9.423	N1	2	Alive	54.96	0
TCGA-A8-A08S-01A	TCGA-A8-A08S-01A	9.45	N1	2	Alive	32.98	0
TCGA-AN-A04D-01A	TCGA-AN-A04D-01A	9.507	N1	2	Alive	1.71	0
TCGA-C8-A275-01A	TCGA-C8-A275-01A	9.668	N1	2	Alive	0.03	0
TCGA-E9-A1ND-01A	TCGA-E9-A1ND-01A	9.685	N1	2	Alive	41.59	0
TCGA-AC-A6IV-01A	TCGA-AC-A6IV-01A	9.716	N1	2	Alive	18.66	0
TCGA-AN-A0FT-01A	TCGA-AN-A0FT-01A	9.716	N1	2	Alive	7.03	0
TCGA-E9-A1NH-01A	TCGA-E9-A1NH-01A	9.731	N1	2	Alive	18.92	0
TCGA-AR-A24W-01A	TCGA-AR-A24W-01A	9.796	N1	2	Alive	50.92	0
TCGA-AC-A3W6-01A	TCGA-AC-A3W6-01A	9.836	N1	2	Alive	19.78	0
TCGA-AC-A23C-01A	TCGA-AC-A23C-01A	9.878	N1	2	Alive	19.22	0
TCGA-HN-A2OB-01A	TCGA-HN-A2OB-01A	9.918	N1	2	Dead	62.42	1
TCGA-E9-A3X8-01A	TCGA-E9-A3X8-01A	10.01	N1	2	Alive	30.42	0
TCGA-E9-A1NE-01A	TCGA-E9-A1NE-01A	10.04	N1	2	Alive	35.74	0
TCGA-JL-A3YW-01A	TCGA-JL-A3YW-01A	10.09	N1	2	Alive	11.83	0
TCGA-E9-A22H-01A	TCGA-E9-A22H-01A	10.1	N1	2	Alive	40.47	0
TCGA-AC-A2FF-01A	TCGA-AC-A2FF-01A	10.11	N1	2	Alive	90.64	0
TCGA-AC-A62Y-01A	TCGA-AC-A62Y-01A	10.14	N1	2	Alive	17.41	0
TCGA-AR-A0TQ-01A	TCGA-AR-A0TQ-01A	10.14	N1	2	Alive	98.26	0
TCGA-EW-A6S9-01A	TCGA-EW-A6S9-01A	10.14	N1	2	Alive	15.21	0
TCGA-EW-A424-01A	TCGA-EW-A424-01A	10.15	N1	2	Alive	23.49	0
TCGA-A8-A097-01A	TCGA-A8-A097-01A	10.32	N1	2	Alive	11.99	0
TCGA-AR-A24U-01A	TCGA-AR-A24U-01A	10.32	N1	2	Alive	102.76	0
TCGA-OL-A5RW-01A	TCGA-OL-A5RW-01A	10.34	N1	2	Alive	36.33	0
TCGA-E2-A14N-01A	TCGA-E2-A14N-01A	10.35	N1	2	Alive	47.11	0
TCGA-A2-A0SY-01A	TCGA-A2-A0SY-01A	10.41	N1	2	Alive	44.25	0
TCGA-E2-A1LI-01A	TCGA-E2-A1LI-01A	10.43	N1	2	Alive	102.53	0
TCGA-E2-A15S-01A	TCGA-E2-A15S-01A	10.52	N1	2	Alive	14.06	0
TCGA-E9-A1NC-01A	TCGA-E9-A1NC-01A	10.52	N1	2	Alive	39.52	0
TCGA-BH-A1EO-01A	TCGA-BH-A1EO-01A	10.53	N1	2	Dead	91.92	1
TCGA-C8-A12W-01A	TCGA-C8-A12W-01A	10.53	N1	2	Alive	12.65	0
TCGA-E9-A1R0-01A	TCGA-E9-A1R0-01A	10.53	N1	2	Alive	28.25	0
TCGA-E9-A1N5-01A	TCGA-E9-A1N5-01A	10.65	N1	2	Alive	36.79	0
TCGA-AC-A2FO-01A	TCGA-AC-A2FO-01A	10.66	N1	2	Alive	74.08	0
TCGA-AR-A0TS-01A	TCGA-AR-A0TS-01A	10.7	N1	2	Alive	84.03	0
TCGA-B6-A0IK-01A	TCGA-B6-A0IK-01A	10.7	N1	2	Dead	18.76	1
TCGA-MS-A51U-01A	TCGA-MS-A51U-01A	10.7	N1	2	Alive	22.37	0
TCGA-C8-A26W-01A	TCGA-C8-A26W-01A	10.71	N1	2	Alive	12.52	0
TCGA-E9-A1N6-01A	TCGA-E9-A1N6-01A	10.73	N1	2	Dead	22.27	1
TCGA-BH-A1FE-01A	TCGA-BH-A1FE-01A	10.75	N1	2	Dead	74.67	1
TCGA-C8-A273-01A	TCGA-C8-A273-01A	10.77	N1	2	Alive	16.85	0
TCGA-AR-A2LO-01A	TCGA-AR-A2LO-01A	10.8	N1	2	Alive	39.36	0
TCGA-AR-A2LJ-01A	TCGA-AR-A2LJ-01A	10.9	N1	2	Alive	86.47	0
TCGA-A8-A09K-01A	TCGA-A8-A09K-01A	10.93	N1	2	Alive	29.96	0
TCGA-AR-A1AM-01A	TCGA-AR-A1AM-01A	10.95	N1	2	Alive	98.26	0
TCGA-D8-A141-01A	TCGA-D8-A141-01A	10.98	N1	2	Alive	20.57	0
TCGA-E9-A227-01A	TCGA-E9-A227-01A	11.01	N1	2	Alive	32.03	0
TCGA-E2-A1IE-01A	TCGA-E2-A1IE-01A	11.09	N1	2	Alive	77.6	0
TCGA-C8-A132-01A	TCGA-C8-A132-01A	11.16	N1	2	Alive	12.58	0
TCGA-AR-A1AL-01A	TCGA-AR-A1AL-01A	11.24	N1	2	Alive	97.6	0
TCGA-AC-A23G-01A	TCGA-AC-A23G-01A	11.29	N1	2	Alive	73.85	0
TCGA-AR-A0TX-01A	TCGA-AR-A0TX-01A	11.3	N1	2	Alive	64.78	0
TCGA-AR-A5QP-01A	TCGA-AR-A5QP-01A	11.31	N1	2	Alive	38.93	0
TCGA-OL-A5RU-01A	TCGA-OL-A5RU-01A	11.32	N1	2	Alive	40.05	0
TCGA-E9-A2JS-01A	TCGA-E9-A2JS-01A	11.34	N1	2	Dead	29.7	1
TCGA-AR-A2LM-01A	TCGA-AR-A2LM-01A	11.47	N1	2	Alive	63.57	0
TCGA-AO-A1KT-01A	TCGA-AO-A1KT-01A	11.51	N1	2	Alive	17.77	0
TCGA-E2-A1B1-01A	TCGA-E2-A1B1-01A	11.64	N1	2	Alive	87.16	0
TCGA-A7-A13E-01A	TCGA-A7-A13E-01A	11.73	N1	2	Dead	20.17	1
TCGA-E9-A228-01A	TCGA-E9-A228-01A	11.76	N1	2	Alive	42.21	0
TCGA-AO-A1KQ-01A	TCGA-AO-A1KQ-01A	11.83	N1	2	Alive	61.83	0
TCGA-BH-A0HK-01A	TCGA-BH-A0HK-01A	11.85	N1	2	Alive	5.85	0
TCGA-B6-A1KC-01B	TCGA-B6-A1KC-01B	11.94	N1	2	Alive	43.56	0
TCGA-AO-A0JI-01A	TCGA-AO-A0JI-01A	12.04	N1	2	Alive	50.2	0
TCGA-AO-A1KP-01A	TCGA-AO-A1KP-01A	12.06	N1	2	Alive	97.01	0
TCGA-S3-A6ZG-01A	TCGA-S3-A6ZG-01A	12.21	N1	2	Alive	18.46	0
TCGA-B6-A0RT-01A	TCGA-B6-A0RT-01A	12.22	N1	2	Alive	89.39	0
TCGA-AO-A0J7-01A	TCGA-AO-A0J7-01A	12.23	N1	2	Alive	20.3	0
TCGA-B6-A1KN-01A	TCGA-B6-A1KN-01A	12.27	N1	2	Alive	139.06	0
TCGA-B6-A0WT-01A	TCGA-B6-A0WT-01A	12.43	N1	2	Alive	188.53	0
TCGA-AR-A0U3-01A	TCGA-AR-A0U3-01A	12.44	N1	2	Alive	134.03	0
TCGA-OL-A5RY-01A	TCGA-OL-A5RY-01A	12.49	N1	2	Alive	24.7	0
TCGA-B6-A3ZX-01A	TCGA-B6-A3ZX-01A	12.69	N1	2	Dead	37.84	1
TCGA-C8-A12X-01A	TCGA-C8-A12X-01A	12.99	N1	2	Alive	12.65	0
TCGA-C8-A27A-01A	TCGA-C8-A27A-01A	13.23	N1	2	Alive	24.54	0
TCGA-A2-A1G1-01A	TCGA-A2-A1G1-01A	13.62	N1	2	Alive	19.19	0
TCGA-BH-A0GY-01A	TCGA-BH-A0GY-01A	13.62	N1	2	Alive	30.32	0
TCGA-AR-A1AO-01A	TCGA-AR-A1AO-01A	13.69	N1	2	Alive	86.01	0
TCGA-AR-A5QQ-01A	TCGA-AR-A5QQ-01A	13.71	N1	2	Dead	10.58	1
TCGA-C8-A12K-01A	TCGA-C8-A12K-01A	14.26	N1	2	Alive	0	0
TCGA-B6-A0X1-01A	TCGA-B6-A0X1-01A	14.7	N1	2	Dead	244.91	1
TCGA-C8-A133-01A	TCGA-C8-A133-01A	15.22	N1	2	Alive	0	0
TCGA-D8-A1X9-01A	TCGA-D8-A1X9-01A	9.119	N1a	2	Alive	23.88	0
TCGA-A2-A0CW-01A	TCGA-A2-A0CW-01A	9.143	N1a	2	Alive	107.85	0
TCGA-AO-A12C-01A	TCGA-AO-A12C-01A	9.192	N1a	2	Alive	77.92	0
TCGA-D8-A1J8-01A	TCGA-D8-A1J8-01A	9.388	N1a	2	Alive	14.16	0
TCGA-EW-A1PE-01A	TCGA-EW-A1PE-01A	9.402	N1a	2	Alive	10.51	0
TCGA-E2-A1IL-01A	TCGA-E2-A1IL-01A	9.564	N1a	2	Alive	3.88	0
TCGA-A8-A06U-01A	TCGA-A8-A06U-01A	9.584	N1a	2	Dead	29.01	1
TCGA-AC-A3HN-01A	TCGA-AC-A3HN-01A	9.614	N1a	2	Alive	16.29	0
TCGA-BH-A0AW-01A	TCGA-BH-A0AW-01A	9.645	N1a	2	Alive	20.43	0
TCGA-BH-A0AZ-01A	TCGA-BH-A0AZ-01A	9.66	N1a	2	Alive	63.04	0
TCGA-D8-A73W-01A	TCGA-D8-A73W-01A	9.675	N1a	2	Dead	12.65	1
TCGA-EW-A1PD-01A	TCGA-EW-A1PD-01A	9.692	N1a	2	Alive	13.93	0
TCGA-LL-A5YP-01A	TCGA-LL-A5YP-01A	9.779	N1a	2	Alive	14.78	0
TCGA-D8-A1XL-01A	TCGA-D8-A1XL-01A	9.782	N1a	2	Alive	19.91	0
TCGA-A7-A26H-01A	TCGA-A7-A26H-01A	9.796	N1a	2	Alive	23.78	0
TCGA-A1-A0SI-01A	TCGA-A1-A0SI-01A	9.799	N1a	2	Alive	20.86	0
TCGA-AO-A12D-01A	TCGA-AO-A12D-01A	9.851	N1a	2	Alive	82.62	0
TCGA-EW-A1J1-01A	TCGA-EW-A1J1-01A	9.887	N1a	2	Alive	18.89	0
TCGA-AC-A3W7-01A	TCGA-AC-A3W7-01A	10.01	N1a	2	Alive	15.47	0
TCGA-A2-A4S3-01A	TCGA-A2-A4S3-01A	10.03	N1a	2	Alive	21.88	0
TCGA-E2-A10B-01A	TCGA-E2-A10B-01A	10.06	N1a	2	Alive	37.48	0
TCGA-BH-A1FR-01A	TCGA-BH-A1FR-01A	10.09	N1a	2	Dead	53.94	1
TCGA-EW-A6SD-01A	TCGA-EW-A6SD-01A	10.12	N1a	2	Alive	33.18	0
TCGA-LL-A5YL-01A	TCGA-LL-A5YL-01A	10.14	N1a	2	Alive	17.05	0
TCGA-EW-A3U0-01A	TCGA-EW-A3U0-01A	10.16	N1a	2	Alive	17.48	0
TCGA-BH-A0HX-01A	TCGA-BH-A0HX-01A	10.17	N1a	2	Alive	27.23	0
TCGA-A8-A08R-01A	TCGA-A8-A08R-01A	10.18	N1a	2	Alive	0.99	0
TCGA-D8-A1Y1-01A	TCGA-D8-A1Y1-01A	10.18	N1a	2	Dead	9.92	1
TCGA-D8-A1XG-01A	TCGA-D8-A1XG-01A	10.19	N1a	2	Alive	14.72	0
TCGA-BH-A1F5-01A	TCGA-BH-A1F5-01A	10.19	N1a	2	Dead	89.09	1
TCGA-E2-A14O-01A	TCGA-E2-A14O-01A	10.21	N1a	2	Alive	44.65	0
TCGA-BH-A0B3-01A	TCGA-BH-A0B3-01A	10.22	N1a	2	Alive	39.52	0
TCGA-BH-A0B1-01A	TCGA-BH-A0B1-01A	10.26	N1a	2	Alive	37.71	0
TCGA-BH-AB28-01A	TCGA-BH-AB28-01A	10.26	N1a	2	Alive	9.43	0
TCGA-A8-A06T-01A	TCGA-A8-A06T-01A	10.27	N1a	2	Alive	53.02	0
TCGA-A7-A13F-01A	TCGA-A7-A13F-01A	10.28	N1a	2	Alive	25.13	0
TCGA-BH-A0BD-01A	TCGA-BH-A0BD-01A	10.28	N1a	2	Alive	18.2	0
TCGA-OL-A66O-01A	TCGA-OL-A66O-01A	10.34	N1a	2	Alive	17.35	0
TCGA-AO-A0JD-01A	TCGA-AO-A0JD-01A	10.41	N1a	2	Alive	71.94	0
TCGA-A8-A07G-01A	TCGA-A8-A07G-01A	10.43	N1a	2	Alive	18.96	0
TCGA-BH-A0E9-01B	TCGA-BH-A0E9-01B	10.44	N1a	2	Alive	81.77	0
TCGA-A2-A1G0-01A	TCGA-A2-A1G0-01A	10.46	N1a	2	Alive	20.24	0
TCGA-E2-A153-01A	TCGA-E2-A153-01A	10.46	N1a	2	Alive	23.23	0
TCGA-AC-A2QI-01A	TCGA-AC-A2QI-01A	10.47	N1a	2	Alive	19.32	0
TCGA-A7-A26E-01A	TCGA-A7-A26E-01A	10.48	N1a	2	Alive	31.34	0
TCGA-GM-A3XG-01A	TCGA-GM-A3XG-01A	10.5	N1a	2	Alive	43.69	0
TCGA-A8-A0A7-01A	TCGA-A8-A0A7-01A	10.55	N1a	2	Alive	0.99	0
TCGA-A8-A084-01A	TCGA-A8-A084-01A	10.56	N1a	2	Alive	15.05	0
TCGA-BH-A0EA-01A	TCGA-BH-A0EA-01A	10.59	N1a	2	Dead	32.56	1
TCGA-D8-A1JB-01A	TCGA-D8-A1JB-01A	10.6	N1a	2	Alive	55.45	0
TCGA-AO-A0JB-01A	TCGA-AO-A0JB-01A	10.62	N1a	2	Alive	50.66	0
TCGA-AO-A0JJ-01A	TCGA-AO-A0JJ-01A	10.64	N1a	2	Alive	61.99	0
TCGA-BH-A0GZ-01A	TCGA-BH-A0GZ-01A	10.73	N1a	2	Alive	10.78	0
TCGA-GM-A2DC-01A	TCGA-GM-A2DC-01A	10.75	N1a	2	Alive	83.28	0
TCGA-OL-A5S0-01A	TCGA-OL-A5S0-01A	10.8	N1a	2	Alive	20.37	0
TCGA-GM-A5PV-01A	TCGA-GM-A5PV-01A	10.81	N1a	2	Alive	13.53	0
TCGA-OK-A5Q2-01A	TCGA-OK-A5Q2-01A	10.84	N1a	2	Alive	2.1	0
TCGA-A2-A3XY-01A	TCGA-A2-A3XY-01A	10.91	N1a	2	Dead	35.91	1
TCGA-EW-A1IX-01A	TCGA-EW-A1IX-01A	10.94	N1a	2	Alive	39.68	0
TCGA-A2-A1G4-01A	TCGA-A2-A1G4-01A	10.95	N1a	2	Alive	19.55	0
TCGA-BH-A0W3-01A	TCGA-BH-A0W3-01A	10.95	N1a	2	Alive	23.92	0
TCGA-D8-A1XK-01A	TCGA-D8-A1XK-01A	10.96	N1a	2	Alive	14.49	0
TCGA-AC-A8OQ-01A	TCGA-AC-A8OQ-01A	10.98	N1a	2	Alive	1.12	0
TCGA-A7-A5ZW-01A	TCGA-A7-A5ZW-01A	10.99	N1a	2	Alive	10.71	0
TCGA-GM-A3NY-01A	TCGA-GM-A3NY-01A	11.01	N1a	2	Alive	38.17	0
TCGA-3C-AALI-01A	TCGA-3C-AALI-01A	11.04	N1a	2	Alive	131.57	0
TCGA-BH-A0DT-01A	TCGA-BH-A0DT-01A	11.11	N1a	2	Alive	78.94	0
TCGA-E2-A10C-01A	TCGA-E2-A10C-01A	11.11	N1a	2	Alive	40.08	0
TCGA-A7-A4SA-01A	TCGA-A7-A4SA-01A	11.13	N1a	2	Alive	14.91	0
TCGA-A8-A086-01A	TCGA-A8-A086-01A	11.21	N1a	2	Alive	13.01	0
TCGA-A2-A0EY-01A	TCGA-A2-A0EY-01A	11.26	N1a	2	Alive	63.24	0
TCGA-BH-A0C0-01A	TCGA-BH-A0C0-01A	11.27	N1a	2	Alive	41.72	0
TCGA-EW-A1PH-01A	TCGA-EW-A1PH-01A	11.33	N1a	2	Alive	19.94	0
TCGA-D8-A1XB-01A	TCGA-D8-A1XB-01A	11.35	N1a	2	Alive	18.13	0
TCGA-AC-A2FG-01A	TCGA-AC-A2FG-01A	11.36	N1a	2	Alive	60.87	0
TCGA-S3-AA12-01A	TCGA-S3-AA12-01A	11.37	N1a	2	Alive	18.86	0
TCGA-GM-A2DF-01A	TCGA-GM-A2DF-01A	11.41	N1a	2	Alive	70.8	0
TCGA-LD-A7W6-01A	TCGA-LD-A7W6-01A	11.45	N1a	2	Alive	13.27	0
TCGA-BH-A8G0-01A	TCGA-BH-A8G0-01A	11.46	N1a	2	Alive	21.75	0
TCGA-EW-A1PA-01A	TCGA-EW-A1PA-01A	11.47	N1a	2	Alive	18.89	0
TCGA-D8-A27K-01A	TCGA-D8-A27K-01A	11.51	N1a	2	Alive	48	0
TCGA-LL-A7T0-01A	TCGA-LL-A7T0-01A	11.52	N1a	2	Alive	12.35	0
TCGA-D8-A1JI-01A	TCGA-D8-A1JI-01A	11.53	N1a	2	Alive	18.96	0
TCGA-BH-A0B7-01A	TCGA-BH-A0B7-01A	11.57	N1a	2	Alive	84.07	0
TCGA-A7-A13H-01A	TCGA-A7-A13H-01A	11.6	N1a	2	Alive	29.53	0
TCGA-Z7-A8R5-01A	TCGA-Z7-A8R5-01A	11.6	N1a	2	Alive	107.98	0
TCGA-LL-A7SZ-01A	TCGA-LL-A7SZ-01A	11.62	N1a	2	Alive	19.51	0
TCGA-BH-A28Q-01A	TCGA-BH-A28Q-01A	11.64	N1a	2	Alive	36.76	0
TCGA-D8-A145-01A	TCGA-D8-A145-01A	11.64	N1a	2	Alive	13.47	0
TCGA-AO-A03R-01A	TCGA-AO-A03R-01A	11.67	N1a	2	Alive	68.69	0
TCGA-A8-A07L-01A	TCGA-A8-A07L-01A	11.68	N1a	2	Alive	32.03	0
TCGA-BH-A5IZ-01A	TCGA-BH-A5IZ-01A	11.72	N1a	2	Alive	18.63	0
TCGA-S3-AA0Z-01A	TCGA-S3-AA0Z-01A	11.72	N1a	2	Alive	20.66	0
TCGA-AO-A03T-01A	TCGA-AO-A03T-01A	11.73	N1a	2	Alive	69.78	0
TCGA-BH-A0EI-01A	TCGA-BH-A0EI-01A	11.81	N1a	2	Alive	63.27	0
TCGA-B6-A401-01A	TCGA-B6-A401-01A	11.83	N1a	2	Alive	85.28	0
TCGA-AC-A5EI-01A	TCGA-AC-A5EI-01A		N1mi	2	Alive	14.52	0
TCGA-A8-A08T-01A	TCGA-A8-A08T-01A	11.91	N1a	2	Dead	111.99	1
TCGA-EW-A1P6-01A	TCGA-EW-A1P6-01A	11.92	N1a	2	Alive	18.46	0
TCGA-AO-A129-01A	TCGA-AO-A129-01A	11.97	N1a	2	Alive	107.95	0
TCGA-A2-A3XT-01A	TCGA-A2-A3XT-01A	12.12	N1a	2	Alive	91	0
TCGA-BH-A1ES-01A	TCGA-BH-A1ES-01A	12.13	N1a	2	Dead	113.73	1
TCGA-3C-AALJ-01A	TCGA-3C-AALJ-01A	12.36	N1a	2	Alive	48.42	0
TCGA-A1-A0SG-01A	TCGA-A1-A0SG-01A	12.43	N1a	2	Alive	14.26	0
TCGA-AC-A7VB-01A	TCGA-AC-A7VB-01A	12.47	N1a	2	Alive	8.21	0
TCGA-A8-A082-01A	TCGA-A8-A082-01A	12.51	N1a	2	Alive	18.04	0
TCGA-E2-A15R-01A	TCGA-E2-A15R-01A	12.52	N1a	2	Alive	56.9	0
TCGA-AC-A2BM-01A	TCGA-AC-A2BM-01A	12.55	N1a	2	Alive	99.28	0
TCGA-BH-A0DI-01A	TCGA-BH-A0DI-01A	12.64	N1a	2	Alive	29.96	0
TCGA-BH-A18I-01A	TCGA-BH-A18I-01A	12.64	N1a	2	Alive	35.91	0
TCGA-AC-A6NO-01A	TCGA-AC-A6NO-01A	12.65	N1a	2	Alive	1.68	0
TCGA-BH-A0DZ-11A	TCGA-BH-A0DZ-11A	12.66	N1a	2	Alive	16.26	0
TCGA-BH-A0W5-01A	TCGA-BH-A0W5-01A	12.73	N1a	2	Alive	42.31	0
TCGA-E2-A56Z-01A	TCGA-E2-A56Z-01A	12.74	N1a	2	Alive	8.28	0
TCGA-EW-A1IW-01A	TCGA-EW-A1IW-01A	12.78	N1a	2	Alive	12.19	0
TCGA-A2-A0CV-01A	TCGA-A2-A0CV-01A	13.1	N1a	2	Alive	98.92	0
TCGA-OL-A66H-01A	TCGA-OL-A66H-01A	8.459	N1mi	2	Alive		0
TCGA-A2-A3Y0-01A	TCGA-A2-A3Y0-01A	13.25	N1a	2	Alive	50.79	0
TCGA-A2-A0ST-01A	TCGA-A2-A0ST-01A	13.31	N1a	2	Alive	99.11	0
TCGA-S3-AA15-01A	TCGA-S3-AA15-01A	13.32	N1a	2	Alive	17.25	0
TCGA-EW-A1PB-01A	TCGA-EW-A1PB-01A	13.39	N1a	2	Alive	19.97	0
TCGA-E2-A1AZ-01A	TCGA-E2-A1AZ-01A	13.46	N1a	2	Alive	76.51	0
TCGA-AO-A03N-01B	TCGA-AO-A03N-01B	14	N1a	2	Alive	66.72	0
TCGA-B6-A0RO-01A	TCGA-B6-A0RO-01A	14.29	N1a	2	Alive	161.93	0
TCGA-D8-A1JM-01A	TCGA-D8-A1JM-01A	14.8	N1a	2	Alive	19.38	0
TCGA-A2-A3XW-01A	TCGA-A2-A3XW-01A	15.2	N1a	2	Alive	56.24	0
TCGA-B6-A0WV-01A	TCGA-B6-A0WV-01A	9.271	N1b	2	Dead	79.4	1
TCGA-BH-A1FL-01A	TCGA-BH-A1FL-01A	9.65	N1b	2	Dead	54.96	1
TCGA-BH-A208-01A	TCGA-BH-A208-01A	9.729	N1b	2	Dead	57.79	1
TCGA-B6-A0X5-01A	TCGA-B6-A0X5-01A	9.797	N1b	2	Dead	68.89	1
TCGA-B6-A0WZ-01A	TCGA-B6-A0WZ-01A	10.03	N1b	2	Alive	206.7	0
TCGA-EW-A1P0-01A	TCGA-EW-A1P0-01A	10.15	N1b	2	Alive	41.1	0
TCGA-BH-A1FH-01A	TCGA-BH-A1FH-01A	10.15	N1b	2	Dead	33.97	1
TCGA-B6-A0IH-01A	TCGA-B6-A0IH-01A	10.27	N1b	2	Dead	112.29	1
TCGA-B6-A0IQ-01A	TCGA-B6-A0IQ-01A	10.34	N1b	2	Alive	140.77	0
TCGA-BH-A1EW-01A	TCGA-BH-A1EW-01A	10.34	N1b	2	Dead	55.65	1
TCGA-B6-A0WW-01A	TCGA-B6-A0WW-01A	10.6	N1b	2	Dead	18.33	1
TCGA-B6-A0IG-01A	TCGA-B6-A0IG-01A	10.68	N1b	2	Dead	146.39	1
TCGA-B6-A0WY-01A	TCGA-B6-A0WY-01A	10.88	N1b	2	Dead	113.7	1
TCGA-B6-A0WX-01A	TCGA-B6-A0WX-01A	10.95	N1b	2	Dead	20.99	1
TCGA-BH-A204-01A	TCGA-BH-A204-01A	10.96	N1b	2	Dead	83.25	1
TCGA-BH-A18Q-01A	TCGA-BH-A18Q-01A	10.97	N1b	2	Dead	55.58	1
TCGA-BH-A1EV-01A	TCGA-BH-A1EV-01A	11.14	N1b	2	Dead	11.99	1
TCGA-BH-A1FB-01A	TCGA-BH-A1FB-01A	11.16	N1b	2	Dead	120.53	1
TCGA-BH-A1FC-01A	TCGA-BH-A1FC-01A	11.5	N1b	2	Dead	114.06	1
TCGA-BH-A203-01A	TCGA-BH-A203-01A	11.92	N1b	2	Dead	38.57	1
TCGA-AO-A0J3-01A	TCGA-AO-A0J3-01A	12.08	N1b	2	Alive	21.39	0
TCGA-B6-A0I5-01A	TCGA-B6-A0I5-01A	13.22	N1b	2	Alive	281.08	0
TCGA-BH-A1F0-01A	TCGA-BH-A1F0-01A	11.59	N1c	2	Dead	25.79	1
TCGA-BH-A0BS-11A	TCGA-BH-A0BS-11A	11.97	N1c	2	Alive	85.81	0
TCGA-GM-A5PX-01A	TCGA-GM-A5PX-01A	9.116	N1mi	2	Alive	18.1	0
TCGA-A2-A3KD-01A	TCGA-A2-A3KD-01A	9.376	N1mi	2	Alive	39.62	0
TCGA-BH-A0C7-01B	TCGA-BH-A0C7-01B	9.43	N1mi	2	Alive	90.9	0
TCGA-A7-A4SB-01A	TCGA-A7-A4SB-01A	9.606	N1mi	2	Alive	13.73	0
TCGA-EW-A1J2-01A	TCGA-EW-A1J2-01A	9.733	N1mi	2	Alive	13.24	0
TCGA-E2-A15H-01A	TCGA-E2-A15H-01A	9.806	N1mi	2	Alive	12.91	0
TCGA-E2-A14Q-01A	TCGA-E2-A14Q-01A	9.953	N1mi	2	Alive	38.21	0
TCGA-BH-A0BT-01A	TCGA-BH-A0BT-01A	10.06	N1mi	2	Alive	77.69	0
TCGA-EW-A2FS-01A	TCGA-EW-A2FS-01A	10.2	N1mi	2	Alive	52.69	0
TCGA-EW-A1OV-01A	TCGA-EW-A1OV-01A	10.31	N1mi	2	Alive	25.92	0
TCGA-AC-A3QP-01A	TCGA-AC-A3QP-01A	10.34	N1mi	2	Alive	22.17	0
TCGA-E2-A1IK-01A	TCGA-E2-A1IK-01A	10.47	N1mi	2	Alive	59.13	0
TCGA-E2-A1IG-01A	TCGA-E2-A1IG-01A	10.48	N1mi	2	Alive	70.3	0
TCGA-AC-A3TM-01A	TCGA-AC-A3TM-01A	10.49	N1mi	2	Alive	25.03	0
TCGA-A2-A0ER-01A	TCGA-A2-A0ER-01A	10.65	N1mi	2	Alive	74.34	0
TCGA-E2-A1L6-01A	TCGA-E2-A1L6-01A	10.66	N1mi	2	Alive	54.14	0
TCGA-AC-A2FM-01A	TCGA-AC-A2FM-01A	10.67	N1mi	2	Dead	26.02	1
TCGA-BH-A0BF-01A	TCGA-BH-A0BF-01A	10.87	N1mi	2	Dead	43.5	1
TCGA-BH-A42V-01A	TCGA-BH-A42V-01A	11.29	N1mi	2	Alive	20.86	0
TCGA-S3-AA17-01A	TCGA-S3-AA17-01A	11.32	N1mi	2	Alive	13.93	0
TCGA-A2-A0T3-01A	TCGA-A2-A0T3-01A	11.33	N1mi	2	Alive	49.8	0
TCGA-LD-A66U-01A	TCGA-LD-A66U-01A	11.37	N1mi	2	Alive	21.22	0
TCGA-AC-A3OD-01B	TCGA-AC-A3OD-01B	12.12	N1mi	2	Alive	14.82	0
TCGA-WT-AB41-01A	TCGA-WT-AB41-01A	13.13	N1mi	2	Alive	52.92	0
TCGA-E2-A570-01A	TCGA-E2-A570-01A	13.55	N1mi	2	Alive	30.58	0
TCGA-E2-A158-01A	TCGA-E2-A158-01A	13.95	N1mi	2	Alive	14.78	0
TCGA-OL-A66I-01A	TCGA-OL-A66I-01A	15.97	N1mi	2	Alive	23.46	0
TCGA-A8-A06Q-01A	TCGA-A8-A06Q-01A	9.177	N2	3	Alive	1.02	0
TCGA-AR-A0U2-01A	TCGA-AR-A0U2-01A	9.219	N2	3	Dead	83.8	1
TCGA-E9-A1N4-01A	TCGA-E9-A1N4-01A	9.234	N2	3	Alive	32.85	0
TCGA-C8-A26V-01A	TCGA-C8-A26V-01A	9.259	N2	3	Alive	20.24	0
TCGA-AN-A0XS-01A	TCGA-AN-A0XS-01A	9.325	N2	3	Alive	0.33	0
TCGA-E9-A1RI-01A	TCGA-E9-A1RI-01A	9.413	N2	3	Alive	47.6	0
TCGA-PL-A8LZ-01A	TCGA-PL-A8LZ-01A	9.49	N2	3	Alive	9.92	0
TCGA-A2-A0SW-01A	TCGA-A2-A0SW-01A	9.499	N2	3	Dead	44.84	1
TCGA-AR-A24O-01A	TCGA-AR-A24O-01A	9.505	N2	3	Alive	118.5	0
TCGA-E2-A1B0-01A	TCGA-E2-A1B0-01A	9.591	N2	3	Alive	53.58	0
TCGA-C8-A12Q-01A	TCGA-C8-A12Q-01A	9.683	N2	3	Dead	12.65	1
TCGA-BH-A1FM-01A	TCGA-BH-A1FM-01A	9.698	N2	3	Dead	45.6	1
TCGA-C8-A130-01A	TCGA-C8-A130-01A	9.7	N2	3	Alive	12.16	0
TCGA-C8-A8HR-01A	TCGA-C8-A8HR-01A	9.882	N2	3	Alive	13.4	0
TCGA-AN-A0FZ-01A	TCGA-AN-A0FZ-01A	10.02	N2	3	Alive	0.33	0
TCGA-AN-A0FW-01A	TCGA-AN-A0FW-01A	10.12	N2	3	Alive	0.36	0
TCGA-E2-A572-01A	TCGA-E2-A572-01A	10.14	N2	3	Alive	39.68	0
TCGA-BH-A0B4-01A	TCGA-BH-A0B4-01A	10.16	N2	3	Alive	39.13	0
TCGA-E9-A1RE-01A	TCGA-E9-A1RE-01A	10.25	N2	3	Alive	46.62	0
TCGA-AR-A0TT-01A	TCGA-AR-A0TT-01A	10.28	N2	3	Alive	108.94	0
TCGA-AN-A0XO-01A	TCGA-AN-A0XO-01A	10.33	N2	3	Alive	12.32	0
TCGA-AR-A2LK-01A	TCGA-AR-A2LK-01A	10.35	N2	3	Dead	54.17	1
TCGA-C8-A8HP-01A	TCGA-C8-A8HP-01A	10.4	N2	3	Alive	13.01	0
TCGA-AR-A24R-01A	TCGA-AR-A24R-01A	10.48	N2	3	Alive	112.68	0
TCGA-E2-A1L7-01A	TCGA-E2-A1L7-01A	10.61	N2	3	Alive	60.32	0
TCGA-AN-A0XT-01A	TCGA-AN-A0XT-01A	10.73	N2	3	Alive	0.33	0
TCGA-BH-A1F8-01A	TCGA-BH-A1F8-01A	10.8	N2	3	Dead	25.07	1
TCGA-AN-A0XV-01A	TCGA-AN-A0XV-01A	10.88	N2	3	Alive	5.32	0
TCGA-E9-A54Y-01A	TCGA-E9-A54Y-01A	10.91	N2	3	Alive	23.82	0
TCGA-AN-A0XN-01A	TCGA-AN-A0XN-01A	11.03	N2	3	Alive	0.33	0
TCGA-AR-A1AR-01A	TCGA-AR-A1AR-01A	11.03	N2	3	Dead	17.21	1
TCGA-A2-A4S2-01A	TCGA-A2-A4S2-01A	11.08	N2	3	Alive	21.12	0
TCGA-E2-A14X-01A	TCGA-E2-A14X-01A	11.49	N2	3	Alive	31.93	0
TCGA-B6-A0RV-01A	TCGA-B6-A0RV-01A	11.6	N2	3	Alive	169.38	0
TCGA-E9-A1N3-01A	TCGA-E9-A1N3-01A	12.42	N2	3	Alive	34.79	0
TCGA-AR-A251-01A	TCGA-AR-A251-01A	12.55	N2	3	Alive	99.54	0
TCGA-C8-A138-01A	TCGA-C8-A138-01A	14.26	N2	3	Alive	12.48	0
TCGA-AN-A0FJ-01A	TCGA-AN-A0FJ-01A	15.32	N2	3	Alive	7.95	0
TCGA-E2-A1B4-01A	TCGA-E2-A1B4-01A	9.229	N2a	3	Dead	32.98	1
TCGA-D8-A1JF-01A	TCGA-D8-A1JF-01A	9.363	N2a	3	Alive	12.02	0
TCGA-D8-A13Z-01A	TCGA-D8-A13Z-01A	9.376	N2a	3	Alive	20.86	0
TCGA-LL-A6FQ-01A	TCGA-LL-A6FQ-01A	9.475	N2a	3	Alive	2.63	0
TCGA-D8-A27N-01A	TCGA-D8-A27N-01A	9.497	N2a	3	Alive	17.05	0
TCGA-AO-A0JG-01A	TCGA-AO-A0JG-01A	9.533	N2a	3	Alive	26.22	0
TCGA-A2-A0YT-01A	TCGA-A2-A0YT-01A	9.585	N2a	3	Dead	23.75	1
TCGA-A2-A25E-01A	TCGA-A2-A25E-01A	9.738	N2a	3	Alive	105.26	0
TCGA-A7-A2KD-01A	TCGA-A7-A2KD-01A	9.749	N2a	3	Alive	22.31	0
TCGA-A2-A1G6-01A	TCGA-A2-A1G6-01A	9.81	N2a	3	Alive	16.46	0
TCGA-V7-A7HQ-01A	TCGA-V7-A7HQ-01A	9.822	N2a	3	Alive	66.79	0
TCGA-BH-A1F6-01A	TCGA-BH-A1F6-01A	9.844	N2a	3	Dead	97.4	1
TCGA-AC-A2BK-01A	TCGA-AC-A2BK-01A	9.858	N2a	3	Alive	73	0
TCGA-BH-A0DV-01A	TCGA-BH-A0DV-01A	9.971	N2a	3	Alive	67.81	0
TCGA-B6-A409-01A	TCGA-B6-A409-01A	9.976	N2a	3	Dead	18.82	1
TCGA-A8-A06P-01A	TCGA-A8-A06P-01A	9.99	N2a	3	Alive	13.01	0
TCGA-AO-A0JE-01A	TCGA-AO-A0JE-01A	10	N2a	3	Alive	76.71	0
TCGA-A2-A3XS-01A	TCGA-A2-A3XS-01A	10.07	N2a	3	Dead	33.9	1
TCGA-PE-A5DC-01A	TCGA-PE-A5DC-01A	10.18	N2a	3	Dead	46.98	1
TCGA-AQ-A7U7-01A	TCGA-AQ-A7U7-01A	10.28	N2a	3	Dead	19.19	1
TCGA-E2-A108-01A	TCGA-E2-A108-01A	10.32	N2a	3	Alive	27.5	0
TCGA-D8-A27I-01A	TCGA-D8-A27I-01A	10.46	N2a	3	Alive	14.42	0
TCGA-E2-A107-01A	TCGA-E2-A107-01A	10.57	N2a	3	Alive	34.4	0
TCGA-AC-A3BB-01A	TCGA-AC-A3BB-01A	10.64	N2a	3	Alive	32.42	0
TCGA-A8-A07I-01A	TCGA-A8-A07I-01A	10.68	N2a	3	Alive	13.99	0
TCGA-D8-A1Y0-01A	TCGA-D8-A1Y0-01A	10.76	N2a	3	Alive	15.51	0
TCGA-A2-A0YH-01A	TCGA-A2-A0YH-01A	10.77	N2a	3	Alive	21.65	0
TCGA-BH-A0H7-01A	TCGA-BH-A0H7-01A	10.77	N2a	3	Alive	23.06	0
TCGA-A2-A0CL-01A	TCGA-A2-A0CL-01A	10.86	N2a	3	Alive	99.05	0
TCGA-EW-A1IZ-01A	TCGA-EW-A1IZ-01A	11.11	N2a	3	Alive	18.2	0
TCGA-GM-A3XN-01A	TCGA-GM-A3XN-01A	11.13	N2a	3	Alive	66.33	0
TCGA-D8-A1XD-01A	TCGA-D8-A1XD-01A	11.15	N2a	3	Alive	17.15	0
TCGA-A8-A08L-01A	TCGA-A8-A08L-01A	11.42	N2a	3	Dead	9.99	1
TCGA-B6-A400-01A	TCGA-B6-A400-01A	11.45	N2a	3	Alive	7.06	0
TCGA-D8-A1JC-01A	TCGA-D8-A1JC-01A	11.47	N2a	3	Alive	15.77	0
TCGA-XX-A899-01A	TCGA-XX-A899-01A	11.85	N2a	3	Alive	15.34	0
TCGA-BH-A0E2-01A	TCGA-BH-A0E2-01A	12.07	N2a	3	Alive	14.29	0
TCGA-E2-A1LL-01A	TCGA-E2-A1LL-01A	12.09	N2a	3	Alive	43	0
TCGA-A2-A0SV-01A	TCGA-A2-A0SV-01A	12.69	N2a	3	Dead	27.1	1
TCGA-BH-A0DS-01A	TCGA-BH-A0DS-01A	12.87	N2a	3	Alive	2.56	0
TCGA-A8-A07U-01A	TCGA-A8-A07U-01A	13.2	N2a	3	Alive	24.97	0
TCGA-D8-A1Y3-01A	TCGA-D8-A1Y3-01A	13.3	N2a	3	Alive	14.13	0
TCGA-BH-A0B5-01A	TCGA-BH-A0B5-01A	13.47	N2a	3	Alive	70.17	0
TCGA-D8-A27L-01A	TCGA-D8-A27L-01A	14.64	N2a	3	Alive	16.39	0
TCGA-OL-A66N-01A	TCGA-OL-A66N-01A	9.523	N3	4	Alive	26.02	0
TCGA-AO-A0JA-01A	TCGA-AO-A0JA-01A	9.596	N3	4	Alive	21.52	0
TCGA-OL-A5RV-01A	TCGA-OL-A5RV-01A	10.36	N3	4	Alive	34.89	0
TCGA-BH-A0BC-01A	TCGA-BH-A0BC-01A	10.4	N3	4	Alive	32	0
TCGA-E2-A2P5-01A	TCGA-E2-A2P5-01A	10.44	N3	4	Dead	26.97	1
TCGA-E9-A5FK-01A	TCGA-E9-A5FK-01A	10.69	N3	4	Alive	26.68	0
TCGA-A2-A0T1-01A	TCGA-A2-A0T1-01A	10.72	N3	4	Alive	17.12	0
TCGA-E9-A6HE-01A	TCGA-E9-A6HE-01A	10.73	N3	4	Alive	27.83	0
TCGA-E2-A3DX-01A	TCGA-E2-A3DX-01A	11.15	N3	4	Alive	43.53	0
TCGA-BH-A28O-01A	TCGA-BH-A28O-01A	11.35	N3	4	Alive	36.79	0
TCGA-AR-A2LH-01A	TCGA-AR-A2LH-01A	11.43	N3	4	Dead	20.24	1
TCGA-E2-A14P-01A	TCGA-E2-A14P-01A	11.45	N3	4	Alive	40.93	0
TCGA-AO-A0J9-01A	TCGA-AO-A0J9-01A	11.55	N3	4	Alive	52.99	0
TCGA-E9-A1R2-01A	TCGA-E9-A1R2-01A	11.72	N3	4	Alive	34.92	0
TCGA-C8-A1HO-01A	TCGA-C8-A1HO-01A	11.85	N3	4	Alive	12.32	0
TCGA-AC-A3EH-01A	TCGA-AC-A3EH-01A	12.31	N3	4	Dead	6.47	1
TCGA-E9-A1RC-01A	TCGA-E9-A1RC-01A	12.48	N3	4	Alive	40.21	0
TCGA-AR-A5QN-01A	TCGA-AR-A5QN-01A	12.73	N3	4	Alive	33.28	0
TCGA-D8-A27T-01A	TCGA-D8-A27T-01A	9.295	N3a	4	Alive	13.07	0
TCGA-A2-A25D-01A	TCGA-A2-A25D-01A	9.31	N3a	4	Alive	18.13	0
TCGA-A8-A09N-01A	TCGA-A8-A09N-01A	9.334	N3a	4	Alive	1.02	0
TCGA-AC-A6IX-01A	TCGA-AC-A6IX-01A	9.433	N3a	4	Alive	12.25	0
TCGA-A8-A07E-01A	TCGA-A8-A07E-01A	9.458	N3a	4	Alive	19.97	0
TCGA-A8-A09G-01A	TCGA-A8-A09G-01A	9.547	N3a	4	Alive	0	0
TCGA-D8-A3Z5-01A	TCGA-D8-A3Z5-01A	9.56	N3a	4	Alive	33.34	0
TCGA-D8-A1XS-01A	TCGA-D8-A1XS-01A	9.606	N3a	4	Alive	16.29	0
TCGA-BH-A0BA-01A	TCGA-BH-A0BA-01A	9.71	N3a	4	Alive	37.19	0
TCGA-A2-A0YG-01A	TCGA-A2-A0YG-01A	9.851	N3a	4	Alive	21.88	0
TCGA-EW-A2FV-01A	TCGA-EW-A2FV-01A	9.863	N3a	4	Alive	25.89	0
TCGA-A8-A08X-01A	TCGA-A8-A08X-01A	9.924	N3a	4	Alive	42.97	0
TCGA-A8-A09M-01A	TCGA-A8-A09M-01A	9.981	N3a	4	Alive	33.05	0
TCGA-A8-A09X-01A	TCGA-A8-A09X-01A	10.01	N3a	4	Dead	13.99	1
TCGA-EW-A2FR-01A	TCGA-EW-A2FR-01A	10.15	N3a	4	Alive	54.96	0
TCGA-AQ-A1H3-01A	TCGA-AQ-A1H3-01A	10.41	N3a	4	Alive	32.49	0
TCGA-A8-A0A6-01A	TCGA-A8-A0A6-01A	10.5	N3a	4	Alive	21.02	0
TCGA-GM-A4E0-01A	TCGA-GM-A4E0-01A	10.64	N3a	4	Alive	71.98	0
TCGA-AC-A2FE-01A	TCGA-AC-A2FE-01A	10.72	N3a	4	Dead	86.6	1
TCGA-LL-A9Q3-01A	TCGA-LL-A9Q3-01A	10.75	N3a	4	Alive	17.48	0
TCGA-A7-A425-01A	TCGA-A7-A425-01A	10.8	N3a	4	Alive	14.68	0
TCGA-A2-A4RW-01A	TCGA-A2-A4RW-01A	10.81	N3a	4	Alive	7.29	0
TCGA-AC-A2FK-01A	TCGA-AC-A2FK-01A	10.84	N3a	4	Alive	87.06	0
TCGA-S3-A6ZH-01A	TCGA-S3-A6ZH-01A	10.89	N3a	4	Alive	21.06	0
TCGA-A7-A5ZX-01A	TCGA-A7-A5ZX-01A	10.92	N3a	4	Alive	11.04	0
TCGA-A7-A426-01A	TCGA-A7-A426-01A	10.96	N3a	4	Alive	11.96	0
TCGA-A2-A0EW-01A	TCGA-A2-A0EW-01A	11.02	N3a	4	Dead	61.89	1
TCGA-LD-A74U-01A	TCGA-LD-A74U-01A	11.07	N3a	4	Alive	13.21	0
TCGA-D8-A27R-01A	TCGA-D8-A27R-01A	11.4	N3a	4	Alive	10.09	0
TCGA-A8-A08F-01A	TCGA-A8-A08F-01A	11.42	N3a	4	Alive	32.98	0
TCGA-AC-A3YI-01A	TCGA-AC-A3YI-01A	11.58	N3a	4	Alive	23.23	0
TCGA-A8-A08Z-01A	TCGA-A8-A08Z-01A	11.91	N3a	4	Alive	39.98	0
TCGA-E2-A1LK-01A	TCGA-E2-A1LK-01A	12.18	N3a	4	Dead	8.74	1
TCGA-LD-A7W5-01A	TCGA-LD-A7W5-01A		N3a	4	Alive	7.1	0
TCGA-A2-A0CS-01A	TCGA-A2-A0CS-01A	12.3	N3a	4	Dead	77.14	1
TCGA-E2-A9RU-01A	TCGA-E2-A9RU-01A	12.45	N3a	4	Alive	17.67	0
TCGA-BH-A0E0-01A	TCGA-BH-A0E0-01A	12.5	N3a	4	Alive	4.4	0
TCGA-A2-A4RY-01A	TCGA-A2-A4RY-01A	12.66	N3a	4	Alive	21.29	0
TCGA-B6-A408-01A	TCGA-B6-A408-01A	15.05	N3a	4	Alive	68.07	0
TCGA-EW-A1P1-01A	TCGA-EW-A1P1-01A	10.43	N3b	4	Alive	39.75	0
TCGA-UU-A93S-01A	TCGA-UU-A93S-01A	10.78	N3b	4	Dead	3.81	1
TCGA-EW-A1P8-01A	TCGA-EW-A1P8-01A	13.12	N3b	4	Dead	7.85	1
TCGA-A2-A04P-01A	TCGA-A2-A04P-01A	10.98	N3c	4	Dead	18	1
TCGA-B6-A0IC-01A	TCGA-B6-A0IC-01A	9.394	NX	5	Dead	50.66	1
TCGA-BH-A1EN-01A	TCGA-BH-A1EN-01A	9.571	NX	5	Dead	69.88	1
TCGA-BH-A1FG-01A	TCGA-BH-A1FG-01A	10.5	NX	5	Dead	122.73	1
TCGA-B6-A0WS-01A	TCGA-B6-A0WS-01A	11.35	NX	5	Dead	97.4	1
TCGA-BH-A0B2-01A	TCGA-BH-A0B2-01A	12.8
Total 1283; out of which
179 samples are
duplicated;
Out of this duplication
6 samples - triplicated
173 samples -duplicated
6 x 2 =12
173 x 1 = 173
Total 185
1283-185=1098 (TCGA)
Duplicates Removed
Xena Star Values
Cbioportal-rest

## Sheet: Lnode-OS-04-12-19-Low-50%
sample	sample	Star (fkpm+uq+1)	Neoplasm Disease Lymph Node Stage American Joint Committee on Cancer Code	Node - N0=1; N1=2; N2=3; N3 = 4; NX =5	Patient's Vital Status	Overall Survival (Months)	Dead=1; Alive =0
TCGA-A8-A07B-01A	TCGA-A8-A07B-01A	0	N0	1	Alive	42.97	0
TCGA-A8-A09T-01A	TCGA-A8-A09T-01A	0	N0	1	Alive	19.02	0
TCGA-AN-A03X-01A	TCGA-AN-A03X-01A	0	N0	1	Alive	0.33	0
TCGA-BH-A18G-01A	TCGA-BH-A18G-01A	0	N0	1	Alive	4.89	0
TCGA-AR-A24S-01A	TCGA-AR-A24S-01A	6.35	N0	1	Alive	97.77	0
TCGA-AN-A0G0-01A	TCGA-AN-A0G0-01A	6.4	N0	1	Alive	0.53	0
TCGA-E2-A152-01A	TCGA-E2-A152-01A	6.811	N0	1	Alive	69.91	0
TCGA-E9-A5UO-01A	TCGA-E9-A5UO-01A	6.883	N0	1	Alive	25.79	0
TCGA-A8-A06Y-01A	TCGA-A8-A06Y-01A	6.892	N0	1	Alive	25.99	0
TCGA-E9-A1N9-01A	TCGA-E9-A1N9-01A	6.96	N0	1	Alive	36.17	0
TCGA-A8-A0AD-01A	TCGA-A8-A0AD-01A	6.971	N0	1	Alive	38.01	0
TCGA-C8-A12T-01A	TCGA-C8-A12T-01A	7.01	N0	1	Alive	0	0
TCGA-AR-A2LE-01A	TCGA-AR-A2LE-01A	7.068	N0	1	Alive	166.29	0
TCGA-D8-A1JK-01A	TCGA-D8-A1JK-01A	7.075	N0	1	Alive	20.11	0
TCGA-D8-A27W-01A	TCGA-D8-A27W-01A	7.099	N0	1	Alive	12.25	0
TCGA-D8-A1XW-01A	TCGA-D8-A1XW-01A	7.335	N0	1	Alive	43	0
TCGA-A7-A4SF-01A	TCGA-A7-A4SF-01A	7.341	N0	1	Alive	17.9	0
TCGA-E9-A1NG-01A	TCGA-E9-A1NG-01A	7.391	N0	1	Dead	25.82	1
TCGA-AN-A0AR-01A	TCGA-AN-A0AR-01A	7.632	N0	1	Alive	0.33	0
TCGA-A8-A08A-01A	TCGA-A8-A08A-01A	7.664	N0	1	Alive	0.99	0
TCGA-AR-A0TV-01A	TCGA-AR-A0TV-01A	7.664	N0	1	Alive	75.16	0
TCGA-AN-A0FK-01A	TCGA-AN-A0FK-01A	7.733	N0	1	Alive	7	0
TCGA-A7-A3J0-01A	TCGA-A7-A3J0-01A	7.775	N0	1	Alive	10.28	0
TCGA-E2-A15G-01A	TCGA-E2-A15G-01A	7.817	N0	1	Alive	18.2	0
TCGA-A8-A0A9-01A	TCGA-A8-A0A9-01A	7.896	N0	1	Alive	27	0
TCGA-AR-A24Q-01A	TCGA-AR-A24Q-01A	7.924	N0	1	Alive	104.2	0
TCGA-D8-A1XQ-01A	TCGA-D8-A1XQ-01A	7.929	N0	1	Alive	16.39	0
TCGA-D8-A1JJ-01A	TCGA-D8-A1JJ-01A	7.948	N0	1	Alive	20.07	0
TCGA-EW-A1OX-01A	TCGA-EW-A1OX-01A	7.955	N0	1	Alive	29.93	0
TCGA-A2-A4S1-01A	TCGA-A2-A4S1-01A	7.962	N0	1	Alive	26.94	0
TCGA-D8-A27G-01A	TCGA-D8-A27G-01A	7.992	N0	1	Alive	13.44	0
TCGA-BH-A1FN-01A	TCGA-BH-A1FN-01A	8.044	N0	1	Dead	72.01	1
TCGA-E2-A15L-01A	TCGA-E2-A15L-01A	8.047	N0	1	Alive	20.57	0
TCGA-E9-A1R5-01A	TCGA-E9-A1R5-01A	8.052	N0	1	Alive	3.02	0
TCGA-BH-A5J0-01A	TCGA-BH-A5J0-01A	8.059	N0	1	Alive	23.49	0
TCGA-BH-A18S-01A	TCGA-BH-A18S-01A	8.121	N0	1	Dead	66	1
TCGA-A8-A06Z-01A	TCGA-A8-A06Z-01A	8.13	N0	1	Alive	1.02	0
TCGA-AR-A24X-01A	TCGA-AR-A24X-01A	8.132	N0	1	Alive	98.69	0
TCGA-AN-A0XU-01A	TCGA-AN-A0XU-01A	8.134	N0	1	Alive	0.33	0
TCGA-A2-A3XV-01A	TCGA-A2-A3XV-01A	8.135	N0	1	Alive	32.72	0
TCGA-A8-A07S-01A	TCGA-A8-A07S-01A	8.155	N0	1	Alive	7.98	0
TCGA-BH-A6R8-01A	TCGA-BH-A6R8-01A	8.172	N0	1	Alive	9.63	0
TCGA-AR-A2LL-01A	TCGA-AR-A2LL-01A	8.189	N0	1	Alive	66.1	0
TCGA-A8-A096-01A	TCGA-A8-A096-01A	8.209	N0	1	Alive	0	0
TCGA-A2-A4S0-01A	TCGA-A2-A4S0-01A	8.231	N0	1	Alive	23.19	0
TCGA-C8-A274-01A	TCGA-C8-A274-01A	8.231	N0	1	Alive	16.69	0
TCGA-Z7-A8R6-01A	TCGA-Z7-A8R6-01A	8.243	N0	1	Alive	106.96	0
TCGA-AR-A0TP-01A	TCGA-AR-A0TP-01A	8.259	N0	1	Alive	140.44	0
TCGA-AR-A24K-01A	TCGA-AR-A24K-01A	8.341	N0	1	Alive	50.85	0
TCGA-OL-A66K-01A	TCGA-OL-A66K-01A	8.387	N0	1	Dead	41.89	1
TCGA-D8-A1JU-01A	TCGA-D8-A1JU-01A	8.403	N0	1	Alive	14.68	0
TCGA-E9-A1RH-01A	TCGA-E9-A1RH-01A	8.502	N0	1	Alive	46.55	0
TCGA-D8-A13Y-01A	TCGA-D8-A13Y-01A	8.547	N0	1	Alive	56.77	0
TCGA-A2-A3XX-01A	TCGA-A2-A3XX-01A	8.593	N0	1	Dead	47.27	1
TCGA-BH-A18K-01A	TCGA-BH-A18K-01A	8.597	N0	1	Dead	90.77	1
TCGA-AR-A1AN-01A	TCGA-AR-A1AN-01A	8.612	N0	1	Alive	95.93	0
TCGA-A8-A09C-01A	TCGA-A8-A09C-01A		N0	1	Alive	1.02	0
TCGA-EW-A1OW-01A	TCGA-EW-A1OW-01A	8.621	N0	1	Alive	22.8	0
TCGA-D8-A27E-01A	TCGA-D8-A27E-01A	8.664	N0	1	Alive	17.41	0
TCGA-AN-A0FS-01A	TCGA-AN-A0FS-01A	8.684	N0	1	Alive	6.9	0
TCGA-E2-A156-01A	TCGA-E2-A156-01A	8.718	N0	1	Alive	23.85	0
TCGA-E9-A1R4-01A	TCGA-E9-A1R4-01A	8.723	N0	1	Alive	6.11	0
TCGA-EW-A1OY-01A	TCGA-EW-A1OY-01A	8.735	N0	1	Alive	29.83	0
TCGA-AN-A0FY-01A	TCGA-AN-A0FY-01A	8.758	N0	1	Alive	0.33	0
TCGA-A7-A56D-01A	TCGA-A7-A56D-01A	8.763	N0	1	Alive	14.72	0
TCGA-A8-A06X-01A	TCGA-A8-A06X-01A	8.771	N0	1	Dead	30.98	1
TCGA-D8-A1XV-01A	TCGA-D8-A1XV-01A	8.814	N0	1	Alive	15.14	0
TCGA-EW-A6SC-01A	TCGA-EW-A6SC-01A	8.826	N0	1	Alive	31.27	0
TCGA-A1-A0SD-01A	TCGA-A1-A0SD-01A	8.833	N0	1	Alive	14.36	0
TCGA-B6-A0I1-01A	TCGA-B6-A0I1-01A	8.84	N0	1	Dead	77.56	1
TCGA-BH-A1ET-01A	TCGA-BH-A1ET-01A	8.871	N0	1	Dead	82.79	1
TCGA-D8-A1X7-01A	TCGA-D8-A1X7-01A	8.879	N0	1	Alive	16.72	0
TCGA-A7-A4SE-01A	TCGA-A7-A4SE-01A	8.902	N0	1	Alive	21.16	0
TCGA-A7-A0CD-01A	TCGA-A7-A0CD-01A	8.919	N0	1	Alive	38.27	0
TCGA-E9-A1NF-01A	TCGA-E9-A1NF-01A	8.956	N0	1	Dead	35.22	1
TCGA-D8-A1JS-01A	TCGA-D8-A1JS-01A	8.958	N0	1	Alive	12.19	0
TCGA-E2-A15J-01A	TCGA-E2-A15J-01A	8.958	N0	1	Alive	53.88	0
TCGA-D8-A73U-01A	TCGA-D8-A73U-01A	8.981	N0	1	Alive	16.16	0
TCGA-AN-A03Y-01A	TCGA-AN-A03Y-01A	8.999	N0	1	Alive	0.33	0
TCGA-C8-A1HE-01A	TCGA-C8-A1HE-01A	8.999	N0	1	Alive	12.32	0
TCGA-E2-A1LG-01A	TCGA-E2-A1LG-01A	9.013	N0	1	Alive	50.03	0
TCGA-D8-A1XY-01A	TCGA-D8-A1XY-01A	9.06	N0	1	Alive	16.52	0
TCGA-E2-A14W-01A	TCGA-E2-A14W-01A	9.086	N0	1	Alive	32	0
TCGA-E9-A1RD-01A	TCGA-E9-A1RD-01A	9.109	N0	1	Alive	1.12	0
TCGA-AN-A0FL-01A	TCGA-AN-A0FL-01A	9.12	N0	1	Alive	7.59	0
TCGA-AR-A24Z-01A	TCGA-AR-A24Z-01A	9.141	N0	1	Alive	98.59	0
TCGA-D8-A1JG-01B	TCGA-D8-A1JG-01B	9.142	N0	1	Alive	52.96	0
TCGA-D8-A27F-01A	TCGA-D8-A27F-01A	9.184	N0	1	Alive	16.03	0
TCGA-C8-A27B-01A	TCGA-C8-A27B-01A	9.191	N0	1	Alive	14.42	0
TCGA-D8-A1JT-01A	TCGA-D8-A1JT-01A	9.215	N0	1	Alive	13.3	0
TCGA-EW-A1P3-01A	TCGA-EW-A1P3-01A	9.239	N0	1	Alive	52.92	0
TCGA-PE-A5DE-01A	TCGA-PE-A5DE-01A	9.28	N0	1	Alive	86.89	0
TCGA-B6-A1KI-01A	TCGA-B6-A1KI-01A	9.289	N0	1	Alive	73.46	0
TCGA-BH-A0HY-01A	TCGA-BH-A0HY-01A	9.33	N0	1	Alive	50.76	0
TCGA-AC-A5XS-01A	TCGA-AC-A5XS-01A	9.336	N0	1	Alive	19.32	0
TCGA-D8-A143-01A	TCGA-D8-A143-01A	9.338	N0	1	Alive	14.16	0
TCGA-EW-A423-01A	TCGA-EW-A423-01A	9.341	N0	1	Alive	17.51	0
TCGA-A8-A09Z-01A	TCGA-A8-A09Z-01A	9.348	N0	1	Alive	0	0
TCGA-D8-A142-01A	TCGA-D8-A142-01A	9.369	N0	1	Alive	13.96	0
TCGA-C8-A1HF-01A	TCGA-C8-A1HF-01A	9.372	N0	1	Alive	10.91	0
TCGA-A8-A08C-01A	TCGA-A8-A08C-01A	9.377	N0	1	Alive	28.94	0
TCGA-AQ-A54O-01A	TCGA-AQ-A54O-01A	9.396	N0	1	Alive	32.88	0
TCGA-AR-A250-01A	TCGA-AR-A250-01A	9.409	N0	1	Alive	88.93	0
TCGA-E2-A573-01A	TCGA-E2-A573-01A	9.426	N0	1	Alive	34.89	0
TCGA-E9-A5UP-01A	TCGA-E9-A5UP-01A	9.465	N0	1	Alive	26.38	0
TCGA-A8-A094-01A	TCGA-A8-A094-01A	9.466	N0	1	Alive	0	0
TCGA-AN-A049-01A	TCGA-AN-A049-01A	9.483	N0	1	Alive	0.62	0
TCGA-D8-A27P-01A	TCGA-D8-A27P-01A	9.521	N0	1	Alive	1.61	0
TCGA-E2-A1IN-01A	TCGA-E2-A1IN-01A	9.527	N0	1	Alive	22.17	0
TCGA-A8-A06N-01A	TCGA-A8-A06N-01A	9.534	N0	1	Alive	0	0
TCGA-A8-A07C-01A	TCGA-A8-A07C-01A	9.551	N0	1	Alive	33.97	0
TCGA-A7-A3RF-01A	TCGA-A7-A3RF-01A	9.555	N0	1	Alive	13.4	0
TCGA-BH-A0AV-01A	TCGA-BH-A0AV-01A	9.556	N0	1	Alive	59.79	0
TCGA-AN-A0AM-01A	TCGA-AN-A0AM-01A	9.557	N0	1	Alive	0.16	0
TCGA-A7-A3IY-01A	TCGA-A7-A3IY-01A	9.594	N0	1	Alive	11.33	0
TCGA-LL-A50Y-01A	TCGA-LL-A50Y-01A	9.6	N0	1	Alive	25.03	0
TCGA-D8-A1JP-01A	TCGA-D8-A1JP-01A	9.604	N0	1	Alive	20.99	0
TCGA-AO-A1KR-01A	TCGA-AO-A1KR-01A	9.611	N0	1	Alive	82.56	0
TCGA-E9-A22B-01A	TCGA-E9-A22B-01A	9.628	N0	1	Alive	38.34	0
TCGA-AN-A0AL-01A	TCGA-AN-A0AL-01A	9.633	N0	1	Alive	7.46	0
TCGA-AN-A0FD-01A	TCGA-AN-A0FD-01A	9.636	N0	1	Alive	6.44	0
TCGA-AN-A0FF-01A	TCGA-AN-A0FF-01A	9.636	N0	1	Alive	5.65	0
TCGA-PE-A5DD-01A	TCGA-PE-A5DD-01A	9.685	N0	1	Alive	64.16	0
TCGA-D8-A27H-01A	TCGA-D8-A27H-01A	9.689	N0	1	Alive	13.04	0
TCGA-AN-A0FV-01A	TCGA-AN-A0FV-01A	9.707	N0	1	Alive	0.33	0
TCGA-BH-A0BR-01A	TCGA-BH-A0BR-01A	9.711	N0	1	Alive	76.54	0
TCGA-A8-A0A1-01A	TCGA-A8-A0A1-01A	9.713	N0	1	Alive	11.99	0
TCGA-AC-A3TN-01A	TCGA-AC-A3TN-01A	9.719	N0	1	Alive	14.98	0
TCGA-AC-A62X-01A	TCGA-AC-A62X-01A	9.725	N0	1	Alive	13.7	0
TCGA-A8-A090-01A	TCGA-A8-A090-01A	9.727	N0	1	Alive	0	0
TCGA-D8-A27V-01A	TCGA-D8-A27V-01A	9.73	N0	1	Alive	12.52	0
TCGA-E2-A15M-01A	TCGA-E2-A15M-01A	9.736	N0	1	Dead	11.04	1
TCGA-E9-A1NA-01A	TCGA-E9-A1NA-01A	9.76	N0	1	Alive	36.53	0
TCGA-A8-A07Z-01A	TCGA-A8-A07Z-01A	9.763	N0	1	Alive	45.04	0
TCGA-E2-A1BC-01A	TCGA-E2-A1BC-01A	9.771	N0	1	Alive	16.46	0
TCGA-D8-A147-01A	TCGA-D8-A147-01A	9.773	N0	1	Alive	19.19	0
TCGA-AR-A0TY-01A	TCGA-AR-A0TY-01A	9.806	N0	1	Dead	55.81	1
TCGA-D8-A1XU-01A	TCGA-D8-A1XU-01A	9.832	N0	1	Alive	12.98	0
TCGA-AN-A0FN-01A	TCGA-AN-A0FN-01A	9.84	N0	1	Alive	7.16	0
TCGA-AC-A4ZE-01A	TCGA-AC-A4ZE-01A	9.859	N0	1	Alive	29.24	0
TCGA-BH-A202-01A	TCGA-BH-A202-01A	9.864	N0	1	Alive	26.12	0
TCGA-AR-A24H-01A	TCGA-AR-A24H-01A	9.88	N0	1	Alive	160.78	0
TCGA-D8-A4Z1-01A	TCGA-D8-A4Z1-01A	9.912	N0	1	Alive	21.65	0
TCGA-E2-A15T-01A	TCGA-E2-A15T-01A	9.922	N0	1	Alive	51.35	0
TCGA-D8-A1XM-01A	TCGA-D8-A1XM-01A	9.928	N0	1	Alive	17.67	0
TCGA-GI-A2C8-01A	TCGA-GI-A2C8-01A	9.938	N0	1	Alive	7.39	0
TCGA-BH-A0DO-01B	TCGA-BH-A0DO-01B	9.941	N0	1	Alive	54.01	0
TCGA-AC-A3W5-01A	TCGA-AC-A3W5-01A	9.942	N0	1	Alive	16.56	0
TCGA-AN-A0XL-01A	TCGA-AN-A0XL-01A	9.948	N0	1	Alive	5.35	0
TCGA-E2-A14Z-01A	TCGA-E2-A14Z-01A	9.948	N0	1	Dead	18.5	1
TCGA-A8-A09V-01A	TCGA-A8-A09V-01A	9.967	N0	1	Alive	15.01	0
TCGA-OL-A5D6-01A	TCGA-OL-A5D6-01A	9.968	N0	1	Dead	36.27	1
TCGA-AN-A0AK-01A	TCGA-AN-A0AK-01A	9.977	N0	1	Alive	7.36	0
TCGA-BH-A18H-01A	TCGA-BH-A18H-01A	9.982	N0	1	Alive	21.42	0
TCGA-UL-AAZ6-01A	TCGA-UL-AAZ6-01A	9.983	N0	1	Alive	17.02	0
TCGA-D8-A146-01A	TCGA-D8-A146-01A	9.984	N0	1	Alive	21.12	0
TCGA-B6-A2IU-01A	TCGA-B6-A2IU-01A	9.985	N0	1	Alive	170.04	0
TCGA-XX-A89A-01A	TCGA-XX-A89A-01A	9.987	N0	1	Alive	16.03	0
TCGA-E9-A229-01A	TCGA-E9-A229-01A	9.995	N0	1	Alive	37.71	0
TCGA-E2-A1IJ-01A	TCGA-E2-A1IJ-01A	9.998	N0	1	Alive	28.42	0
TCGA-BH-A18P-01A	TCGA-BH-A18P-01A	10.01	N0	1	Dead	30.26	1
TCGA-A7-A6VV-01A	TCGA-A7-A6VV-01A	10.02	N0	1	Alive	10.28	0
TCGA-AN-A0AT-01A	TCGA-AN-A0AT-01A	10.02	N0	1	Alive	0.33	0
TCGA-D8-A27M-01A	TCGA-D8-A27M-01A	10.02	N0	1	Alive	13.47	0
TCGA-E2-A14R-01A	TCGA-E2-A14R-01A	10.03	N0	1	Alive	38.57	0
TCGA-D8-A73X-01A	TCGA-D8-A73X-01A	10.04	N0	1	Alive	25.2	0
TCGA-C8-A26Z-01A	TCGA-C8-A26Z-01A	10.05	N0	1	Alive	15.44	0
TCGA-E9-A1R7-01A	TCGA-E9-A1R7-01A	10.06	N0	1	Alive	48.19	0
TCGA-BH-A0AU-01A	TCGA-BH-A0AU-01A	10.07	N0	1	Alive	62.88	0
TCGA-E2-A1IO-01A	TCGA-E2-A1IO-01A	10.07	N0	1	Alive	60.94	0
TCGA-E2-A14Y-01A	TCGA-E2-A14Y-01A	10.1	N0	1	Alive	69.28	0
TCGA-OL-A66L-01A	TCGA-OL-A66L-01A	10.11	N0	1	Alive	42.74	0
TCGA-AR-A5QM-01A	TCGA-AR-A5QM-01A	10.12	N0	1	Alive	73.29	0
TCGA-OL-A6VO-01A	TCGA-OL-A6VO-01A	10.12	N0	1	Alive	28.19	0
TCGA-E2-A1LS-01A	TCGA-E2-A1LS-01A	10.15	N0	1	Alive	52.69	0
TCGA-AN-A046-01A	TCGA-AN-A046-01A	10.16	N0	1	Alive	0.33	0
TCGA-5L-AAT0-01A	TCGA-5L-AAT0-01A	10.17	N0	1	Alive	48.52	0
TCGA-A8-A09I-01A	TCGA-A8-A09I-01A	10.17	N0	1	Alive	45.04	0
TCGA-AR-A1AK-01A	TCGA-AR-A1AK-01A	10.18	N0	1	Alive	103.78	0
TCGA-A8-A093-01A	TCGA-A8-A093-01A	10.2	N0	1	Alive	17.94	0
TCGA-A2-A04R-01A	TCGA-A2-A04R-01A	0	N0 (i-)	1	Alive	121.85	0
TCGA-AO-A126-01A	TCGA-AO-A126-01A	0	N0 (i-)	1	Alive	108.64	0
TCGA-C8-A12M-01A	TCGA-C8-A12M-01A	0	N0 (i-)	1	Alive	11.76	0
TCGA-BH-A0HU-01A	TCGA-BH-A0HU-01A	6.555	N0 (i-)	1	Alive	12.88	0
TCGA-A2-A1FZ-01A	TCGA-A2-A1FZ-01A	6.812	N0 (i-)	1	Alive	22.44	0
TCGA-A7-A0CH-01A	TCGA-A7-A0CH-01A	6.915	N0 (i-)	1	Alive	35.45	0
TCGA-AO-A12B-01A	TCGA-AO-A12B-01A	6.966	N0 (i-)	1	Alive	98.19	0
TCGA-B6-A0X0-01A	TCGA-B6-A0X0-01A	7.479	N0 (i-)	1	Dead	129.6	1
TCGA-A2-A0D0-01A	TCGA-A2-A0D0-01A	7.938	N0 (i-)	1	Alive	67.28	0
TCGA-AC-A3YJ-01A	TCGA-AC-A3YJ-01A	8.131	N0 (i-)	1	Alive	24.77	0
TCGA-BH-A0WA-01A	TCGA-BH-A0WA-01A	8.157	N0 (i-)	1	Alive	23.03	0
TCGA-AC-A8OR-01A	TCGA-AC-A8OR-01A	8.204	N0 (i-)	1	Alive	1.31	0
TCGA-LL-A442-01A	TCGA-LL-A442-01A	8.236	N0 (i-)	1	Alive	29.2	0
TCGA-BH-A0H0-01A	TCGA-BH-A0H0-01A	8.241	N0 (i-)	1	Alive	15.14	0
TCGA-B6-A0IP-01A	TCGA-B6-A0IP-01A	8.243	N0 (i-)	1	Dead	128.98	1
TCGA-AO-A125-01A	TCGA-AO-A125-01A	8.302	N0 (i-)	1	Alive	113.53	0
TCGA-B6-A402-01A	TCGA-B6-A402-01A	8.345	N0 (i-)	1	Alive	74.93	0
TCGA-C8-A12L-01A	TCGA-C8-A12L-01A	8.371	N0 (i-)	1	Alive	11.93	0
TCGA-AO-A03U-01B	TCGA-AO-A03U-01B	8.436	N0 (i-)	1	Dead	58.9	1
TCGA-A1-A0SM-01A	TCGA-A1-A0SM-01A	8.455	N0 (i-)	1	Alive	7.95	0
TCGA-B6-A0RS-01A	TCGA-B6-A0RS-01A	8.463	N0 (i-)	1	Dead	100.62	1
TCGA-AO-A12H-01A	TCGA-AO-A12H-01A	8.51	N0 (i-)	1	Alive	40.54	0
TCGA-GM-A2DL-01A	TCGA-GM-A2DL-01A	8.673	N0 (i-)	1	Alive	115.6	0
TCGA-EW-A2FW-01A	TCGA-EW-A2FW-01A	8.719	N0 (i-)	1	Alive	22.08	0
TCGA-B6-A0IA-01A	TCGA-B6-A0IA-01A	8.861	N0 (i-)	1	Alive	275.66	0
TCGA-A2-A0EV-01A	TCGA-A2-A0EV-01A	8.916	N0 (i-)	1	Alive	31.8	0
TCGA-B6-A0RU-01A	TCGA-B6-A0RU-01A	8.974	N0 (i-)	1	Alive	282.69	0
TCGA-B6-A40C-01A	TCGA-B6-A40C-01A	9.035	N0 (i-)	1	Alive	71.09	0
TCGA-BH-A0B8-01A	TCGA-BH-A0B8-01A	9.039	N0 (i-)	1	Alive	51.54	0
TCGA-AC-A2B8-01A	TCGA-AC-A2B8-01A	9.053	N0 (i-)	1	Alive	22.24	0
TCGA-A2-A0T4-01A	TCGA-A2-A0T4-01A	9.086	N0 (i-)	1	Alive	20.5	0
TCGA-A1-A0SE-01A	TCGA-A1-A0SE-01A	9.095	N0 (i-)	1	Alive	43.4	0
TCGA-BH-A0EB-01A	TCGA-BH-A0EB-01A	9.095	N0 (i-)	1	Alive	24.47	0
TCGA-AO-A12F-01A	TCGA-AO-A12F-01A	9.113	N0 (i-)	1	Alive	60.51	0
TCGA-A7-A0DA-01A	TCGA-A7-A0DA-01A	9.125	N0 (i-)	1	Alive	35.64	0
TCGA-BH-A0HN-01A	TCGA-BH-A0HN-01A	9.186	N0 (i-)	1	Alive	16.95	0
TCGA-E9-A248-01A	TCGA-E9-A248-01A	9.23	N0 (i-)	1	Alive	1.94	0
TCGA-LL-A8F5-01A	TCGA-LL-A8F5-01A	9.23	N0 (i-)	1	Alive	19.58	0
TCGA-A1-A0SH-01A	TCGA-A1-A0SH-01A	9.275	N0 (i-)	1	Alive	47.21	0
TCGA-AO-A03O-01A	TCGA-AO-A03O-01A	9.306	N0 (i-)	1	Dead	81.57	1
TCGA-B6-A0IO-01A	TCGA-B6-A0IO-01A	9.307	N0 (i-)	1	Alive	165.64	0
TCGA-E9-A244-01A	TCGA-E9-A244-01A	9.336	N0 (i-)	1	Alive	0.69	0
TCGA-A7-A13D-01A	TCGA-A7-A13D-01A	9.432	N0 (i-)	1	Alive	31.7	0
TCGA-BH-A0HI-01A	TCGA-BH-A0HI-01A	9.467	N0 (i-)	1	Alive	20.37	0
TCGA-E9-A247-01A	TCGA-E9-A247-01A	9.473	N0 (i-)	1	Alive	38.96	0
TCGA-A2-A0CT-01A	TCGA-A2-A0CT-01A	9.49	N0 (i-)	1	Alive	75.2	0
TCGA-WT-AB44-01A	TCGA-WT-AB44-01A	9.503	N0 (i-)	1	Alive	29.01	0
TCGA-AO-A0J2-01A	TCGA-AO-A0J2-01A	9.516	N0 (i-)	1	Alive	32.75	0
TCGA-AO-A03V-01A	TCGA-AO-A03V-01A	9.517	N0 (i-)	1	Alive	44.38	0
TCGA-E2-A14S-01A	TCGA-E2-A14S-01A		N0	1	Alive	33.15	0
TCGA-BH-A0H9-01A	TCGA-BH-A0H9-01A	9.577	N0 (i-)	1	Alive	40.97	0
TCGA-GM-A2DK-01A	TCGA-GM-A2DK-01A	9.592	N0 (i-)	1	Alive	86.89	0
TCGA-GM-A2DM-01A	TCGA-GM-A2DM-01A	9.593	N0 (i-)	1	Alive	105.98	0
TCGA-AC-A5XU-01A	TCGA-AC-A5XU-01A	9.597	N0 (i-)	1	Alive	14.95	0
TCGA-LL-A740-01A	TCGA-LL-A740-01A	9.638	N0 (i-)	1	Alive	14.49	0
TCGA-A2-A0EM-01A	TCGA-A2-A0EM-01A	9.645	N0 (i-)	1	Alive	101.64	0
TCGA-E2-A109-01A	TCGA-E2-A109-01A	9.716	N0 (i-)	1	Alive	46.55	0
TCGA-E2-A10F-01A	TCGA-E2-A10F-01A	9.782	N0 (i-)	1	Alive	28.84	0
TCGA-EW-A1OZ-01A	TCGA-EW-A1OZ-01A	9.784	N0 (i-)	1	Alive	40.37	0
TCGA-A2-A0EO-01A	TCGA-A2-A0EO-01A	9.808	N0 (i-)	1	Alive	80.22	0
TCGA-LL-A6FR-01A	TCGA-LL-A6FR-01A	9.888	N0 (i-)	1	Alive	16.06	0
TCGA-W8-A86G-01A	TCGA-W8-A86G-01A	9.99	N0 (i-)	1	Alive	11.4	0
TCGA-E2-A10A-01A	TCGA-E2-A10A-01A	10.02	N0 (i-)	1	Alive	40.37	0
TCGA-B6-A0RN-01A	TCGA-B6-A0RN-01A	10.04	N0 (i-)	1	Alive	263.07	0
TCGA-A2-A0CP-01A	TCGA-A2-A0CP-01A	10.12	N0 (i-)	1	Alive	92.41	0
TCGA-AO-A1KS-01A	TCGA-AO-A1KS-01A	10.13	N0 (i-)	1	Alive	11.5	0
TCGA-A2-A0CX-01A	TCGA-A2-A0CX-01A	10.14	N0 (i-)	1	Alive	56.77	0
TCGA-BH-A0EE-01A	TCGA-BH-A0EE-01A	10.15	N0 (i-)	1	Alive	30.98	0
TCGA-A2-A04X-01A	TCGA-A2-A04X-01A	10.18	N0 (i-)	1	Alive	55.39	0
TCGA-B6-A0RG-01A	TCGA-B6-A0RG-01A	10.19	N0 (i-)	1	Alive	68.4	0
TCGA-AO-A12G-01A	TCGA-AO-A12G-01A	6.854	N0 (i+)	1	Alive	53.84	0
TCGA-A7-A26G-01A	TCGA-A7-A26G-01A	8.492	N0 (i+)	1	Alive	23.72	0
TCGA-BH-A42T-01A	TCGA-BH-A42T-01A	9.052	N0 (i+)	1	Dead	10.51	1
TCGA-A2-A0YD-01A	TCGA-A2-A0YD-01A	9.279	N0 (i+)	1	Alive	25.26	0
TCGA-A2-A0EX-01A	TCGA-A2-A0EX-01A	9.285	N0 (i+)	1	Alive	24.7	0
TCGA-AO-A12E-01A	TCGA-AO-A12E-01A	9.388	N0 (i+)	1	Alive	70.37	0
TCGA-A2-A0SU-01A	TCGA-A2-A0SU-01A	9.532	N0 (i+)	1	Alive	54.6	0
TCGA-A2-A0YI-01A	TCGA-A2-A0YI-01A	9.797	N0 (i+)	1	Alive	49.44	0
TCGA-BH-A8FY-01A	TCGA-BH-A8FY-01A	9.895	N0 (i+)	1	Dead	9.69	1
TCGA-AO-A03P-01A	TCGA-AO-A03P-01A	0	N1	2	Dead	95.63	1
TCGA-C8-A12P-01A	TCGA-C8-A12P-01A	0	N1	2	Alive	11.76	0
TCGA-C8-A135-01A	TCGA-C8-A135-01A	0	N1	2	Alive	12.91	0
TCGA-C8-A137-01A	TCGA-C8-A137-01A	0	N1	2	Alive	12.45	0
TCGA-A2-A0T0-01A	TCGA-A2-A0T0-01A	6.558	N1	2	Alive	17.51	0
TCGA-E2-A1LB-01A	TCGA-E2-A1LB-01A	7.025	N1	2	Alive	75.76	0
TCGA-AR-A1AS-01A	TCGA-AR-A1AS-01A	7.05	N1	2	Alive	37.78	0
TCGA-B6-A1KF-01A	TCGA-B6-A1KF-01A	7.097	N1	2	Alive	101.45	0
TCGA-A1-A0SN-01A	TCGA-A1-A0SN-01A	7.504	N1	2	Alive	39.29	0
TCGA-E2-A14V-01A	TCGA-E2-A14V-01A	7.525	N1	2	Alive	34.23	0
TCGA-A2-A25B-01A	TCGA-A2-A25B-01A	7.571	N1	2	Alive	42.41	0
TCGA-AN-A04C-01A	TCGA-AN-A04C-01A	7.632	N1	2	Alive	1.77	0
TCGA-A1-A0SQ-01A	TCGA-A1-A0SQ-01A	7.824	N1	2	Alive	18.2	0
TCGA-C8-A12Y-01A	TCGA-C8-A12Y-01A	7.923	N1	2	Alive	48.49	0
TCGA-C8-A12Z-01A	TCGA-C8-A12Z-01A	8.112	N1	2	Alive	12.55	0
TCGA-A8-A07P-01A	TCGA-A8-A07P-01A	8.196	N1	2	Alive	10.97	0
TCGA-A8-A09R-01A	TCGA-A8-A09R-01A	8.295	N1	2	Alive	8.97	0
TCGA-AR-A1AV-01A	TCGA-AR-A1AV-01A	8.342	N1	2	Alive	61.24	0
TCGA-E9-A24A-01A	TCGA-E9-A24A-01A	8.363	N1	2	Alive	24.54	0
TCGA-AR-A1AH-01A	TCGA-AR-A1AH-01A	8.566	N1	2	Alive	125.07	0
TCGA-A1-A0SO-01A	TCGA-A1-A0SO-01A	8.607	N1	2	Alive	27.99	0
TCGA-AR-A0TW-01A	TCGA-AR-A0TW-01A	8.624	N1	2	Alive	98.85	0
TCGA-BH-A18R-01A	TCGA-BH-A18R-01A	8.667	N1	2	Dead	37.52	1
TCGA-E2-A2P6-01A	TCGA-E2-A2P6-01A	8.792	N1	2	Alive	34.53	0
TCGA-C8-A1HL-01A	TCGA-C8-A1HL-01A	8.805	N1	2	Alive	10.41	0
TCGA-AR-A0TR-01A	TCGA-AR-A0TR-01A	8.862	N1	2	Dead	5.26	1
TCGA-A7-A6VY-01A	TCGA-A7-A6VY-01A	8.9	N1	2	Alive	8.74	0
TCGA-B6-A0I6-01A	TCGA-B6-A0I6-01A	8.967	N1	2	Dead	32.56	1
TCGA-BH-A18M-01A	TCGA-BH-A18M-01A	8.967	N1	2	Dead	72.5	1
TCGA-AR-A24V-01A	TCGA-AR-A24V-01A	8.982	N1	2	Alive	105.22	0
TCGA-C8-A8HQ-01A	TCGA-C8-A8HQ-01A	9.122	N1	2	Alive	12.48	0
TCGA-C8-A1HK-01A	TCGA-C8-A1HK-01A	9.159	N1	2	Alive	12.02	0
TCGA-AC-A23E-01A	TCGA-AC-A23E-01A	9.2	N1	2	Alive	22.93	0
TCGA-C8-A12U-01A	TCGA-C8-A12U-01A	9.314	N1	2	Alive	12.65	0
TCGA-AO-A0JM-01A	TCGA-AO-A0JM-01A	9.329	N1	2	Alive	71.75	0
TCGA-C8-A26X-01A	TCGA-C8-A26X-01A	9.345	N1	2	Alive	12.35	0
TCGA-A8-A09D-01A	TCGA-A8-A09D-01A	9.365	N1	2	Alive	50	0
TCGA-AR-A0U0-01A	TCGA-AR-A0U0-01A	9.38	N1	2	Alive	65.31	0
TCGA-BH-A0DQ-01A	TCGA-BH-A0DQ-01A	9.384	N1	2	Alive	3.22	0
TCGA-BH-A0E1-01A	TCGA-BH-A0E1-01A	9.416	N1	2	Alive	15.67	0
TCGA-AR-A24L-01A	TCGA-AR-A24L-01A	9.417	N1	2	Dead	94.15	1
TCGA-A2-A0CY-01A	TCGA-A2-A0CY-01A	9.423	N1	2	Alive	54.96	0
TCGA-A8-A08S-01A	TCGA-A8-A08S-01A	9.45	N1	2	Alive	32.98	0
TCGA-AN-A04D-01A	TCGA-AN-A04D-01A	9.507	N1	2	Alive	1.71	0
TCGA-C8-A275-01A	TCGA-C8-A275-01A	9.668	N1	2	Alive	0.03	0
TCGA-E9-A1ND-01A	TCGA-E9-A1ND-01A	9.685	N1	2	Alive	41.59	0
TCGA-AC-A6IV-01A	TCGA-AC-A6IV-01A	9.716	N1	2	Alive	18.66	0
TCGA-AN-A0FT-01A	TCGA-AN-A0FT-01A	9.716	N1	2	Alive	7.03	0
TCGA-E9-A1NH-01A	TCGA-E9-A1NH-01A	9.731	N1	2	Alive	18.92	0
TCGA-AR-A24W-01A	TCGA-AR-A24W-01A	9.796	N1	2	Alive	50.92	0
TCGA-AC-A3W6-01A	TCGA-AC-A3W6-01A	9.836	N1	2	Alive	19.78	0
TCGA-AC-A23C-01A	TCGA-AC-A23C-01A	9.878	N1	2	Alive	19.22	0
TCGA-HN-A2OB-01A	TCGA-HN-A2OB-01A	9.918	N1	2	Dead	62.42	1
TCGA-E9-A3X8-01A	TCGA-E9-A3X8-01A	10.01	N1	2	Alive	30.42	0
TCGA-E9-A1NE-01A	TCGA-E9-A1NE-01A	10.04	N1	2	Alive	35.74	0
TCGA-JL-A3YW-01A	TCGA-JL-A3YW-01A	10.09	N1	2	Alive	11.83	0
TCGA-E9-A22H-01A	TCGA-E9-A22H-01A	10.1	N1	2	Alive	40.47	0
TCGA-AC-A2FF-01A	TCGA-AC-A2FF-01A	10.11	N1	2	Alive	90.64	0
TCGA-AC-A62Y-01A	TCGA-AC-A62Y-01A	10.14	N1	2	Alive	17.41	0
TCGA-AR-A0TQ-01A	TCGA-AR-A0TQ-01A	10.14	N1	2	Alive	98.26	0
TCGA-EW-A6S9-01A	TCGA-EW-A6S9-01A	10.14	N1	2	Alive	15.21	0
TCGA-EW-A424-01A	TCGA-EW-A424-01A	10.15	N1	2	Alive	23.49	0
TCGA-A8-A06R-01A	TCGA-A8-A06R-01A	0	N1a	2	Alive	17.97	0
TCGA-BH-A0HL-01A	TCGA-BH-A0HL-01A	0	N1a	2	Alive	2.37	0
TCGA-D8-A1XR-01A	TCGA-D8-A1XR-01A	0	N1a	2	Alive	15.83	0
TCGA-AO-A0J5-01A	TCGA-AO-A0J5-01A	6.286	N1a	2	Dead	26.02	1
TCGA-D8-A1XC-01A	TCGA-D8-A1XC-01A	7.004	N1a	2	Dead	12.39	1
TCGA-AC-A62V-01A	TCGA-AC-A62V-01A	7.021	N1a	2	Dead	11.43	1
TCGA-D8-A1JE-01A	TCGA-D8-A1JE-01A	7.337	N1a	2	Alive	18.89	0
TCGA-BH-A0E7-01A	TCGA-BH-A0E7-01A	7.341	N1a	2	Alive	44.78	0
TCGA-A2-A0YE-01A	TCGA-A2-A0YE-01A	7.487	N1a	2	Alive	18.2	0
TCGA-A2-A3KC-01A	TCGA-A2-A3KC-01A	7.598	N1a	2	Alive	36.2	0
TCGA-D8-A1JD-01A	TCGA-D8-A1JD-01A	7.661	N1a	2	Alive	18.13	0
TCGA-A8-A09E-01A	TCGA-A8-A09E-01A	7.785	N1a	2	Alive	49.01	0
TCGA-BH-A0BV-01A	TCGA-BH-A0BV-01A	7.787	N1a	2	Alive	49.9	0
TCGA-BH-A0HO-01A	TCGA-BH-A0HO-01A	7.91	N1a	2	Alive	2.5	0
TCGA-E2-A155-01A	TCGA-E2-A155-01A	7.914	N1a	2	Alive	21.02	0
TCGA-E2-A10E-01A	TCGA-E2-A10E-01A	7.987	N1a	2	Alive	28.42	0
TCGA-A8-A07J-01A	TCGA-A8-A07J-01A	8.025	N1a	2	Alive	11.99	0
TCGA-AN-A041-01A	TCGA-AN-A041-01A	8.099	N1a	2	Alive	0.23	0
TCGA-E2-A15K-01A	TCGA-E2-A15K-01A	8.316	N1a	2	Alive	9.03	0
TCGA-A8-A085-01A	TCGA-A8-A085-01A	8.34	N1a	2	Alive	36.93	0
TCGA-D8-A140-01A	TCGA-D8-A140-01A	8.346	N1a	2	Alive	13.24	0
TCGA-BH-A0DH-01A	TCGA-BH-A0DH-01A	8.358	N1a	2	Alive	37.98	0
TCGA-D8-A1XJ-01A	TCGA-D8-A1XJ-01A	8.447	N1a	2	Alive	21.81	0
TCGA-A2-A25C-01A	TCGA-A2-A25C-01A	8.451	N1a	2	Alive	17.18	0
TCGA-A8-A07F-01A	TCGA-A8-A07F-01A	8.535	N1a	2	Alive	18.96	0
TCGA-A8-A09B-01A	TCGA-A8-A09B-01A	8.553	N1a	2	Alive	11.99	0
TCGA-D8-A1XO-01A	TCGA-D8-A1XO-01A	8.565	N1a	2	Alive	55.26	0
TCGA-PL-A8LX-01A	TCGA-PL-A8LX-01A	8.646	N1a	2	Alive	0.16	0
TCGA-BH-A0BJ-01A	TCGA-BH-A0BJ-01A	8.668	N1a	2	Alive	21.68	0
TCGA-EW-A1P5-01A	TCGA-EW-A1P5-01A	8.736	N1a	2	Alive	23.09	0
TCGA-BH-A0BZ-01A	TCGA-BH-A0BZ-01A	8.741	N1a	2	Alive	74.08	0
TCGA-E2-A1L8-01A	TCGA-E2-A1L8-01A	8.801	N1a	2	Alive	73.59	0
TCGA-EW-A1PG-01A	TCGA-EW-A1PG-01A	8.836	N1a	2	Alive	34.53	0
TCGA-BH-A0DD-01A	TCGA-BH-A0DD-01A	8.917	N1a	2	Alive	81.67	0
TCGA-E2-A1LA-01A	TCGA-E2-A1LA-01A	8.945	N1a	2	Alive	24.57	0
TCGA-D8-A1XT-01A	TCGA-D8-A1XT-01A	8.981	N1a	2	Alive	16.62	0
TCGA-A8-A075-01A	TCGA-A8-A075-01A	8.989	N1a	2	Alive	17.02	0
TCGA-A2-A0D4-01A	TCGA-A2-A0D4-01A	9.003	N1a	2	Alive	25.2	0
TCGA-A1-A0SJ-01A	TCGA-A1-A0SJ-01A	9.006	N1a	2	Alive	13.67	0
TCGA-AO-A0JF-01A	TCGA-AO-A0JF-01A	9.034	N1a	2	Alive	65.05	0
TCGA-BH-A0BM-01A	TCGA-BH-A0BM-01A	9.039	N1a	2	Alive	61.63	0
TCGA-E2-A15E-01A	TCGA-E2-A15E-01A	9.086	N1a	2	Alive	20.7	0
TCGA-LQ-A4E4-01A	TCGA-LQ-A4E4-01A	9.089	N1a	2	Alive	27.89	0
TCGA-D8-A1X9-01A	TCGA-D8-A1X9-01A	9.119	N1a	2	Alive	23.88	0
TCGA-A2-A0CW-01A	TCGA-A2-A0CW-01A	9.143	N1a	2	Alive	107.85	0
TCGA-AO-A12C-01A	TCGA-AO-A12C-01A	9.192	N1a	2	Alive	77.92	0
TCGA-D8-A1J8-01A	TCGA-D8-A1J8-01A	9.388	N1a	2	Alive	14.16	0
TCGA-EW-A1PE-01A	TCGA-EW-A1PE-01A	9.402	N1a	2	Alive	10.51	0
TCGA-E2-A1IL-01A	TCGA-E2-A1IL-01A	9.564	N1a	2	Alive	3.88	0
TCGA-A8-A06U-01A	TCGA-A8-A06U-01A	9.584	N1a	2	Dead	29.01	1
TCGA-AC-A3HN-01A	TCGA-AC-A3HN-01A	9.614	N1a	2	Alive	16.29	0
TCGA-BH-A0AW-01A	TCGA-BH-A0AW-01A	9.645	N1a	2	Alive	20.43	0
TCGA-BH-A0AZ-01A	TCGA-BH-A0AZ-01A	9.66	N1a	2	Alive	63.04	0
TCGA-D8-A73W-01A	TCGA-D8-A73W-01A	9.675	N1a	2	Dead	12.65	1
TCGA-EW-A1PD-01A	TCGA-EW-A1PD-01A	9.692	N1a	2	Alive	13.93	0
TCGA-LL-A5YP-01A	TCGA-LL-A5YP-01A	9.779	N1a	2	Alive	14.78	0
TCGA-D8-A1XL-01A	TCGA-D8-A1XL-01A	9.782	N1a	2	Alive	19.91	0
TCGA-A7-A26H-01A	TCGA-A7-A26H-01A	9.796	N1a	2	Alive	23.78	0
TCGA-A1-A0SI-01A	TCGA-A1-A0SI-01A	9.799	N1a	2	Alive	20.86	0
TCGA-AO-A12D-01A	TCGA-AO-A12D-01A	9.851	N1a	2	Alive	82.62	0
TCGA-EW-A1J1-01A	TCGA-EW-A1J1-01A	9.887	N1a	2	Alive	18.89	0
TCGA-AC-A3W7-01A	TCGA-AC-A3W7-01A	10.01	N1a	2	Alive	15.47	0
TCGA-A2-A4S3-01A	TCGA-A2-A4S3-01A	10.03	N1a	2	Alive	21.88	0
TCGA-E2-A10B-01A	TCGA-E2-A10B-01A	10.06	N1a	2	Alive	37.48	0
TCGA-BH-A1FR-01A	TCGA-BH-A1FR-01A	10.09	N1a	2	Dead	53.94	1
TCGA-EW-A6SD-01A	TCGA-EW-A6SD-01A	10.12	N1a	2	Alive	33.18	0
TCGA-LL-A5YL-01A	TCGA-LL-A5YL-01A	10.14	N1a	2	Alive	17.05	0
TCGA-EW-A3U0-01A	TCGA-EW-A3U0-01A	10.16	N1a	2	Alive	17.48	0
TCGA-BH-A0HX-01A	TCGA-BH-A0HX-01A	10.17	N1a	2	Alive	27.23	0
TCGA-A8-A08R-01A	TCGA-A8-A08R-01A	10.18	N1a	2	Alive	0.99	0
TCGA-D8-A1Y1-01A	TCGA-D8-A1Y1-01A	10.18	N1a	2	Dead	9.92	1
TCGA-D8-A1XG-01A	TCGA-D8-A1XG-01A	10.19	N1a	2	Alive	14.72	0
TCGA-BH-A1F5-01A	TCGA-BH-A1F5-01A	10.19	N1a	2	Dead	89.09	1
TCGA-BH-A18V-01A	TCGA-BH-A18V-01A	7.56	N1b	2	Dead	51.12	1
TCGA-BH-A18N-01A	TCGA-BH-A18N-01A	7.588	N1b	2	Dead	37.71	1
TCGA-B6-A0RP-01A	TCGA-B6-A0RP-01A	7.918	N1b	2	Dead	102.69	1
TCGA-BH-A1F2-01A	TCGA-BH-A1F2-01A	7.929	N1b	2	Dead	31.5	1
TCGA-GM-A2DA-01A	TCGA-GM-A2DA-01A	8.19	N1b	2	Dead	216.59	1
TCGA-BH-A1EX-01A	TCGA-BH-A1EX-01A	8.305	N1b	2	Dead	49.54	1
TCGA-BH-A1FJ-01A	TCGA-BH-A1FJ-01A	8.539	N1b	2	Dead	63.3	1
TCGA-B6-A0X4-01A	TCGA-B6-A0X4-01A	8.903	N1b	2	Dead	28.25	1
TCGA-B6-A0IE-01A	TCGA-B6-A0IE-01A	8.913	N1b	2	Dead	65.47	1
TCGA-B6-A0RI-01A	TCGA-B6-A0RI-01A	9.066	N1b	2	Alive	234.1	0
TCGA-B6-A0WV-01A	TCGA-B6-A0WV-01A	9.271	N1b	2	Dead	79.4	1
TCGA-BH-A1FL-01A	TCGA-BH-A1FL-01A	9.65	N1b	2	Dead	54.96	1
TCGA-BH-A208-01A	TCGA-BH-A208-01A	9.729	N1b	2	Dead	57.79	1
TCGA-B6-A0X5-01A	TCGA-B6-A0X5-01A	9.797	N1b	2	Dead	68.89	1
TCGA-B6-A0WZ-01A	TCGA-B6-A0WZ-01A	10.03	N1b	2	Alive	206.7	0
TCGA-EW-A1P0-01A	TCGA-EW-A1P0-01A	10.15	N1b	2	Alive	41.1	0
TCGA-BH-A1FH-01A	TCGA-BH-A1FH-01A	10.15	N1b	2	Dead	33.97	1
TCGA-BH-A18L-01A	TCGA-BH-A18L-01A	7.985	N1mi	2	Dead	26.64	1
TCGA-AC-A5EH-01A	TCGA-AC-A5EH-01A	8.452	N1mi	2	Alive	16.79	0
TCGA-A2-A04Y-01A	TCGA-A2-A04Y-01A	8.716	N1mi	2	Alive	36.1	0
TCGA-A2-A04W-01A	TCGA-A2-A04W-01A	8.881	N1mi	2	Alive	101.91	0
TCGA-A2-A3XU-01A	TCGA-A2-A3XU-01A	8.944	N1mi	2	Dead	29.96	1
TCGA-E2-A1L9-01A	TCGA-E2-A1L9-01A	9	N1mi	2	Alive	19.65	0
TCGA-E2-A106-01A	TCGA-E2-A106-01A	9.002	N1mi	2	Alive	83.48	0
TCGA-A2-A0YC-01A	TCGA-A2-A0YC-01A	9.107	N1mi	2	Alive	32.52	0
TCGA-GM-A5PX-01A	TCGA-GM-A5PX-01A	9.116	N1mi	2	Alive	18.1	0
TCGA-A2-A3KD-01A	TCGA-A2-A3KD-01A	9.376	N1mi	2	Alive	39.62	0
TCGA-BH-A0C7-01B	TCGA-BH-A0C7-01B	9.43	N1mi	2	Alive	90.9	0
TCGA-A7-A4SB-01A	TCGA-A7-A4SB-01A	9.606	N1mi	2	Alive	13.73	0
TCGA-EW-A1J2-01A	TCGA-EW-A1J2-01A	9.733	N1mi	2	Alive	13.24	0
TCGA-E2-A15H-01A	TCGA-E2-A15H-01A	9.806	N1mi	2	Alive	12.91	0
TCGA-E2-A14Q-01A	TCGA-E2-A14Q-01A	9.953	N1mi	2	Alive	38.21	0
TCGA-BH-A0BT-01A	TCGA-BH-A0BT-01A	10.06	N1mi	2	Alive	77.69	0
TCGA-EW-A2FS-01A	TCGA-EW-A2FS-01A	10.2	N1mi	2	Alive	52.69	0
TCGA-E9-A226-01A	TCGA-E9-A226-01A	0	N2	3	Dead	34.43	1
TCGA-AR-A24M-01A	TCGA-AR-A24M-01A	7.139	N2	3	Alive	120.24	0
TCGA-E9-A1RF-01A	TCGA-E9-A1RF-01A	7.553	N2	3	Alive	6.57	0
TCGA-BH-A18J-01A	TCGA-BH-A18J-01A	7.625	N2	3	Dead	20.11	1
TCGA-AN-A04A-01A	TCGA-AN-A04A-01A	7.629	N2	3	Alive	2.96	0
TCGA-E9-A22E-01A	TCGA-E9-A22E-01A	7.681	N2	3	Alive	41.69	0
TCGA-AR-A254-01A	TCGA-AR-A254-01A	7.856	N2	3	Alive	85.58	0
TCGA-C8-A131-01A	TCGA-C8-A131-01A	8.11	N2	3	Alive	13.5	0
TCGA-AN-A0XP-01A	TCGA-AN-A0XP-01A	8.141	N2	3	Alive	0.3	0
TCGA-AR-A0TZ-01A	TCGA-AR-A0TZ-01A	8.365	N2	3	Dead	107.16	1
TCGA-C8-A1HI-01A	TCGA-C8-A1HI-01A	8.46	N2	3	Alive	11.27	0
TCGA-AO-A03L-01A	TCGA-AO-A03L-01A	8.531	N2	3	Alive	80.22	0
TCGA-AN-A0AS-01A	TCGA-AN-A0AS-01A	8.587	N2	3	Alive	0.33	0
TCGA-AN-A0XW-01A	TCGA-AN-A0XW-01A	8.73	N2	3	Alive	5.58	0
TCGA-AN-A0XR-01A	TCGA-AN-A0XR-01A	8.889	N2	3	Alive	0.33	0
TCGA-AR-A1AU-01A	TCGA-AR-A1AU-01A	8.993	N2	3	Alive	94.22	0
TCGA-E9-A1RG-01A	TCGA-E9-A1RG-01A	9.059	N2	3	Alive	21.25	0
TCGA-C8-A278-01A	TCGA-C8-A278-01A	9.066	N2	3	Alive	9.76	0
TCGA-A8-A06Q-01A	TCGA-A8-A06Q-01A	9.177	N2	3	Alive	1.02	0
TCGA-AR-A0U2-01A	TCGA-AR-A0U2-01A	9.219	N2	3	Dead	83.8	1
TCGA-E9-A1N4-01A	TCGA-E9-A1N4-01A	9.234	N2	3	Alive	32.85	0
TCGA-C8-A26V-01A	TCGA-C8-A26V-01A	9.259	N2	3	Alive	20.24	0
TCGA-AN-A0XS-01A	TCGA-AN-A0XS-01A	9.325	N2	3	Alive	0.33	0
TCGA-E9-A1RI-01A	TCGA-E9-A1RI-01A	9.413	N2	3	Alive	47.6	0
TCGA-PL-A8LZ-01A	TCGA-PL-A8LZ-01A	9.49	N2	3	Alive	9.92	0
TCGA-A2-A0SW-01A	TCGA-A2-A0SW-01A	9.499	N2	3	Dead	44.84	1
TCGA-AR-A24O-01A	TCGA-AR-A24O-01A	9.505	N2	3	Alive	118.5	0
TCGA-E2-A1B0-01A	TCGA-E2-A1B0-01A	9.591	N2	3	Alive	53.58	0
TCGA-C8-A12Q-01A	TCGA-C8-A12Q-01A	9.683	N2	3	Dead	12.65	1
TCGA-BH-A1FM-01A	TCGA-BH-A1FM-01A	9.698	N2	3	Dead	45.6	1
TCGA-C8-A130-01A	TCGA-C8-A130-01A	9.7	N2	3	Alive	12.16	0
TCGA-C8-A8HR-01A	TCGA-C8-A8HR-01A	9.882	N2	3	Alive	13.4	0
TCGA-AN-A0FZ-01A	TCGA-AN-A0FZ-01A	10.02	N2	3	Alive	0.33	0
TCGA-AN-A0FW-01A	TCGA-AN-A0FW-01A	10.12	N2	3	Alive	0.36	0
TCGA-E2-A572-01A	TCGA-E2-A572-01A	10.14	N2	3	Alive	39.68	0
TCGA-BH-A0B4-01A	TCGA-BH-A0B4-01A	10.16	N2	3	Alive	39.13	0
TCGA-A2-A0YJ-01A	TCGA-A2-A0YJ-01A	0	N2a	3	Alive	18.59	0
TCGA-AQ-A0Y5-01A	TCGA-AQ-A0Y5-01A	0	N2a	3	Dead	5.65	1
TCGA-AQ-A1H2-01A	TCGA-AQ-A1H2-01A	6.191	N2a	3	Alive	15.6	0
TCGA-BH-A18U-01A	TCGA-BH-A18U-01A	6.623	N2a	3	Dead	51.35	1
TCGA-A8-A092-01A	TCGA-A8-A092-01A	7.342	N2a	3	Alive	30.95	0
TCGA-AO-A0JL-01A	TCGA-AO-A0JL-01A	7.412	N2a	3	Alive	55.29	0
TCGA-A2-A0CK-01A	TCGA-A2-A0CK-01A	7.773	N2a	3	Alive	136.63	0
TCGA-D8-A1X6-01A	TCGA-D8-A1X6-01A	7.814	N2a	3	Alive	17.77	0
TCGA-A2-A0ET-01A	TCGA-A2-A0ET-01A	7.871	N2a	3	Alive	35.02	0
TCGA-BH-A0C1-01B	TCGA-BH-A0C1-01B	8.117	N2a	3	Dead	46.35	1
TCGA-AQ-A04H-01B	TCGA-AQ-A04H-01B	8.39	N2a	3	Alive	24.77	0
TCGA-A2-A1FX-01A	TCGA-A2-A1FX-01A	8.469	N2a	3	Alive	60.68	0
TCGA-4H-AAAK-01A	TCGA-4H-AAAK-01A	8.495	N2a	3	Alive	11.43	0
TCGA-A2-A0YL-01A	TCGA-A2-A0YL-01A	8.789	N2a	3	Alive	48.42	0
TCGA-A8-A08P-01A	TCGA-A8-A08P-01A	8.844	N2a	3	Alive	30.98	0
TCGA-D8-A1XZ-01A	TCGA-D8-A1XZ-01A	8.854	N2a	3	Alive	15.31	0
TCGA-A2-A1FW-01A	TCGA-A2-A1FW-01A	8.923	N2a	3	Alive	17.35	0
TCGA-BH-A0HP-01A	TCGA-BH-A0HP-01A	9.048	N2a	3	Alive	13.6	0
TCGA-A8-A09Q-01A	TCGA-A8-A09Q-01A	9.061	N2a	3	Alive	25	0
TCGA-D8-A1X8-01A	TCGA-D8-A1X8-01A	9.062	N2a	3	Alive	25.72	0
TCGA-E2-A1B4-01A	TCGA-E2-A1B4-01A	9.229	N2a	3	Dead	32.98	1
TCGA-D8-A1JF-01A	TCGA-D8-A1JF-01A	9.363	N2a	3	Alive	12.02	0
TCGA-D8-A13Z-01A	TCGA-D8-A13Z-01A	9.376	N2a	3	Alive	20.86	0
TCGA-LL-A6FQ-01A	TCGA-LL-A6FQ-01A	9.475	N2a	3	Alive	2.63	0
TCGA-D8-A27N-01A	TCGA-D8-A27N-01A	9.497	N2a	3	Alive	17.05	0
TCGA-AO-A0JG-01A	TCGA-AO-A0JG-01A	9.533	N2a	3	Alive	26.22	0
TCGA-A2-A0YT-01A	TCGA-A2-A0YT-01A	9.585	N2a	3	Dead	23.75	1
TCGA-A2-A25E-01A	TCGA-A2-A25E-01A	9.738	N2a	3	Alive	105.26	0
TCGA-A7-A2KD-01A	TCGA-A7-A2KD-01A	9.749	N2a	3	Alive	22.31	0
TCGA-A2-A1G6-01A	TCGA-A2-A1G6-01A	9.81	N2a	3	Alive	16.46	0
TCGA-V7-A7HQ-01A	TCGA-V7-A7HQ-01A	9.822	N2a	3	Alive	66.79	0
TCGA-BH-A1F6-01A	TCGA-BH-A1F6-01A	9.844	N2a	3	Dead	97.4	1
TCGA-AC-A2BK-01A	TCGA-AC-A2BK-01A	9.858	N2a	3	Alive	73	0
TCGA-BH-A0DV-01A	TCGA-BH-A0DV-01A	9.971	N2a	3	Alive	67.81	0
TCGA-B6-A409-01A	TCGA-B6-A409-01A	9.976	N2a	3	Dead	18.82	1
TCGA-A8-A06P-01A	TCGA-A8-A06P-01A	9.99	N2a	3	Alive	13.01	0
TCGA-AO-A0JE-01A	TCGA-AO-A0JE-01A	10	N2a	3	Alive	76.71	0
TCGA-A2-A3XS-01A	TCGA-A2-A3XS-01A	10.07	N2a	3	Dead	33.9	1
TCGA-PE-A5DC-01A	TCGA-PE-A5DC-01A	10.18	N2a	3	Dead	46.98	1
TCGA-A2-A0T2-01A	TCGA-A2-A0T2-01A	0	N3	4	Dead	8.38	1
TCGA-A8-A09W-01A	TCGA-A8-A09W-01A	6.976	N3	4	Alive	0.99	0
TCGA-AR-A24T-01A	TCGA-AR-A24T-01A	7.456	N3	4	Alive	105.19	0
TCGA-A8-A08J-01A	TCGA-A8-A08J-01A	8.092	N3	4	Dead	37.02	1
TCGA-A8-A079-01A	TCGA-A8-A079-01A	8.179	N3	4	Alive	9	0
TCGA-B6-A0IB-01A	TCGA-B6-A0IB-01A	8.54	N3	4	Dead	129.47	1
TCGA-E9-A3Q9-01A	TCGA-E9-A3Q9-01A	8.759	N3	4	Alive	32.88	0
TCGA-E9-A1R3-01A	TCGA-E9-A1R3-01A	8.866	N3	4	Alive	2.56	0
TCGA-OL-A66N-01A	TCGA-OL-A66N-01A	9.523	N3	4	Alive	26.02	0
TCGA-AO-A0JA-01A	TCGA-AO-A0JA-01A	9.596	N3	4	Alive	21.52	0
TCGA-E2-A15A-01A	TCGA-E2-A15A-01A	6.452	N3a	4	Alive	23.32	0
TCGA-D8-A1X5-01A	TCGA-D8-A1X5-01A	6.968	N3a	4	Alive	18.56	0
TCGA-A8-A099-01A	TCGA-A8-A099-01A	7.331	N3a	4	Alive	9.99	0
TCGA-D8-A1JN-01A	TCGA-D8-A1JN-01A	8.202	N3a	4	Alive	20.37	0
TCGA-A8-A07R-01A	TCGA-A8-A07R-01A	8.411	N3a	4	Alive	8.97	0
TCGA-E2-A1LE-01A	TCGA-E2-A1LE-01A	8.452	N3a	4	Dead	28.88	1
TCGA-AR-A0U1-01A	TCGA-AR-A0U1-01A		N1	2	Alive	133.11	0
TCGA-D8-A3Z6-01A	TCGA-D8-A3Z6-01A	8.839	N3a	4	Alive	18.5	0
TCGA-A8-A08O-01A	TCGA-A8-A08O-01A	8.84	N3a	4	Alive	30.98	0
TCGA-D8-A27T-01A	TCGA-D8-A27T-01A	9.295	N3a	4	Alive	13.07	0
TCGA-A2-A25D-01A	TCGA-A2-A25D-01A	9.31	N3a	4	Alive	18.13	0
TCGA-C8-A9FZ-01A	TCGA-C8-A9FZ-01A		N1	2	Alive	19.45	0
TCGA-E9-A245-01A	TCGA-E9-A245-01A	11.14	N1	2	Dead		1
TCGA-A8-A09N-01A	TCGA-A8-A09N-01A	9.334	N3a	4	Alive	1.02	0
TCGA-AC-A6IX-01A	TCGA-AC-A6IX-01A	9.433	N3a	4	Alive	12.25	0
TCGA-A8-A07E-01A	TCGA-A8-A07E-01A	9.458	N3a	4	Alive	19.97	0
TCGA-A8-A09G-01A	TCGA-A8-A09G-01A	9.547	N3a	4	Alive	0	0
TCGA-D8-A3Z5-01A	TCGA-D8-A3Z5-01A	9.56	N3a	4	Alive	33.34	0
TCGA-D8-A1XS-01A	TCGA-D8-A1XS-01A	9.606	N3a	4	Alive	16.29	0
TCGA-BH-A0BA-01A	TCGA-BH-A0BA-01A	9.71	N3a	4	Alive	37.19	0
TCGA-A2-A0YG-01A	TCGA-A2-A0YG-01A	9.851	N3a	4	Alive	21.88	0
TCGA-EW-A2FV-01A	TCGA-EW-A2FV-01A	9.863	N3a	4	Alive	25.89	0
TCGA-A8-A08X-01A	TCGA-A8-A08X-01A	9.924	N3a	4	Alive	42.97	0
TCGA-A8-A09M-01A	TCGA-A8-A09M-01A	9.981	N3a	4	Alive	33.05	0
TCGA-A8-A09X-01A	TCGA-A8-A09X-01A	10.01	N3a	4	Dead	13.99	1
TCGA-EW-A2FR-01A	TCGA-EW-A2FR-01A	10.15	N3a	4	Alive	54.96	0
TCGA-AC-A23H-01A	TCGA-AC-A23H-01A	6.378	NX	5	Dead	5.72	1
TCGA-B6-A0RM-01A	TCGA-B6-A0RM-01A	8.616	NX	5	Dead	77.96	1
TCGA-B6-A0I9-01A	TCGA-B6-A0I9-01A	8.772	NX	5	Dead	11.89	1
TCGA-B6-A0IC-01A	TCGA-B6-A0IC-01A	9.394	NX	5	Dead	50.66	1
TCGA-BH-A1EN-01A	TCGA-BH-A1EN-01A	9.571	NX	5	Dead	69.88	1
TCGA-AC-A5EI-01A	TCGA-AC-A5EI-01A		N1mi	2	Alive	14.52	0
TCGA-OL-A66H-01A	TCGA-OL-A66H-01A	8.459	N1mi	2	Alive		0
TCGA-LD-A7W5-01A	TCGA-LD-A7W5-01A		N3a	4	Alive	7.1	0
TCGA-BH-A0B2-01A	TCGA-BH-A0B2-01A	12.8
Total 1283; out of which
179 samples are
duplicated;
Out of this duplication
6 samples - triplicated
173 samples -duplicated
6 x 2 =12
173 x 1 = 173
Total 185
1283-185=1098 (TCGA)
Duplicates Removed
Xena Star Values
Cbioportal-rest

## Sheet: Lnode-OS-04-12-19-Hi-50%
sample	sample	Star (fkpm+uq+1)	Neoplasm Disease Lymph Node Stage American Joint Committee on Cancer Code	Node - N0=1; N1=2; N2=3; N3 = 4; NX =5	Patient's Vital Status	Overall Survival (Months)	Dead=1; Alive =0
TCGA-A8-A09C-01A	TCGA-A8-A09C-01A		N0	1	Alive	1.02	0
TCGA-E2-A14S-01A	TCGA-E2-A14S-01A		N0	1	Alive	33.15	0
TCGA-E2-A576-01A	TCGA-E2-A576-01A	10.22	N0	1	Alive	34.26	0
TCGA-A7-A26J-01A	TCGA-A7-A26J-01A	10.27	N0	1	Alive	20.6	0
TCGA-A8-A0A2-01A	TCGA-A8-A0A2-01A	10.27	N0	1	Alive	19.02	0
TCGA-C8-A3M7-01A	TCGA-C8-A3M7-01A	10.27	N0	1	Dead	33.97	1
TCGA-D8-A1XA-01A	TCGA-D8-A1XA-01A	10.27	N0	1	Alive	27.56	0
TCGA-EW-A1J3-01A	TCGA-EW-A1J3-01A	10.27	N0	1	Alive	16.56	0
TCGA-E9-A1R6-01A	TCGA-E9-A1R6-01A	10.29	N0	1	Alive	11.14	0
TCGA-BH-A0BP-01A	TCGA-BH-A0BP-01A	10.3	N0	1	Dead	75.43	1
TCGA-A8-A091-01A	TCGA-A8-A091-01A	10.31	N0	1	Alive	32.98	0
TCGA-AC-A7VC-01A	TCGA-AC-A7VC-01A	10.31	N0	1	Alive	0.03	0
TCGA-D8-A1JH-01A	TCGA-D8-A1JH-01A	10.33	N0	1	Alive	13.99	0
TCGA-AR-A2LR-01A	TCGA-AR-A2LR-01A	10.34	N0	1	Alive	57.23	0
TCGA-BH-A1FU-01A	TCGA-BH-A1FU-01A	10.36	N0	1	Dead	55.45	1
TCGA-BH-A18F-01A	TCGA-BH-A18F-01A	10.38	N0	1	Alive	32.88	0
TCGA-AR-A252-01A	TCGA-AR-A252-01A	10.39	N0	1	Alive	93.23	0
TCGA-AR-A0U1-01A	TCGA-AR-A0U1-01A		N1	2	Alive	133.11	0
TCGA-D8-A1J9-01A	TCGA-D8-A1J9-01A	10.39	N0	1	Alive	17.48	0
TCGA-EW-A1PF-01A	TCGA-EW-A1PF-01A	10.4	N0	1	Alive	14.42	0
TCGA-AN-A0FX-01A	TCGA-AN-A0FX-01A	10.41	N0	1	Alive	0.33	0
TCGA-OL-A5DA-01A	TCGA-OL-A5DA-01A	10.41	N0	1	Alive	58.57	0
TCGA-A8-A0A4-01A	TCGA-A8-A0A4-01A	10.42	N0	1	Alive	13.01	0
TCGA-EW-A3E8-01B	TCGA-EW-A3E8-01B	10.42	N0	1	Alive	34	0
TCGA-BH-A0C3-01A	TCGA-BH-A0C3-01A	10.43	N0	1	Alive	88.99	0
TCGA-E2-A1IF-01A	TCGA-E2-A1IF-01A	10.43	N0	1	Alive	37.39	0
TCGA-AR-A2LQ-01A	TCGA-AR-A2LQ-01A	10.44	N0	1	Alive	40.51	0
TCGA-C8-A1HN-01A	TCGA-C8-A1HN-01A	10.5	N0	1	Alive	12.94	0
TCGA-AR-A256-01A	TCGA-AR-A256-01A	10.54	N0	1	Dead	93.76	1
TCGA-OL-A66P-01A	TCGA-OL-A66P-01A	10.54	N0	1	Alive	14.06	0
TCGA-S3-AA11-01A	TCGA-S3-AA11-01A	10.54	N0	1	Alive	13.83	0
TCGA-BH-A201-01A	TCGA-BH-A201-01A	10.55	N0	1	Alive	28.12	0
TCGA-AR-A0TU-01A	TCGA-AR-A0TU-01A	10.56	N0	1	Alive	23.29	0
TCGA-A7-A3J1-01A	TCGA-A7-A3J1-01A	10.58	N0	1	Alive	11.27	0
TCGA-AR-A255-01A	TCGA-AR-A255-01A	10.58	N0	1	Alive	70.99	0
TCGA-BH-A1EU-01A	TCGA-BH-A1EU-01A	10.6	N0	1	Dead	42.25	1
TCGA-A7-A4SC-01A	TCGA-A7-A4SC-01A	10.6	N0	1	Alive	14.65	0
TCGA-OL-A6VR-01A	TCGA-OL-A6VR-01A	10.61	N0	1	Alive	40.08	0
TCGA-BH-A0BL-01A	TCGA-BH-A0BL-01A	10.63	N0	1	Alive	74.84	0
TCGA-E2-A159-01A	TCGA-E2-A159-01A	10.64	N0	1	Alive	25.03	0
TCGA-HN-A2NL-01A	TCGA-HN-A2NL-01A	10.65	N0	1	Alive	2.6	0
TCGA-A8-A06O-01A	TCGA-A8-A06O-01A	10.66	N0	1	Alive	13.01	0
TCGA-E2-A574-01A	TCGA-E2-A574-01A	10.67	N0	1	Alive	38.73	0
TCGA-AR-A1AT-01A	TCGA-AR-A1AT-01A	10.69	N0	1	Dead	41.79	1
TCGA-OL-A5RZ-01A	TCGA-OL-A5RZ-01A	10.71	N0	1	Alive	22.31	0
TCGA-A8-A08B-01A	TCGA-A8-A08B-01A	10.73	N0	1	Alive	37.98	0
TCGA-E9-A22D-01A	TCGA-E9-A22D-01A	10.73	N0	1	Alive	41	0
TCGA-BH-A0DG-01A	TCGA-BH-A0DG-01A	10.75	N0	1	Alive	67.05	0
TCGA-BH-A0DE-01A	TCGA-BH-A0DE-01A	10.79	N0	1	Alive	77.92	0
TCGA-A8-A076-01A	TCGA-A8-A076-01A	10.8	N0	1	Alive	53.94	0
TCGA-C8-A1HJ-01A	TCGA-C8-A1HJ-01A	10.8	N0	1	Alive	0.16	0
TCGA-E2-A1IH-01A	TCGA-E2-A1IH-01A	10.8	N0	1	Alive	33.71	0
TCGA-A8-A083-01A	TCGA-A8-A083-01A	10.81	N0	1	Alive	0	0
TCGA-E2-A14T-01A	TCGA-E2-A14T-01A	10.81	N0	1	Alive	75.92	0
TCGA-A1-A0SB-01A	TCGA-A1-A0SB-01A	10.83	N0	1	Alive	8.51	0
TCGA-AC-A2QH-01B	TCGA-AC-A2QH-01B	10.85	N0	1	Alive	33.02	0
TCGA-C8-A1HG-01A	TCGA-C8-A1HG-01A	10.89	N0	1	Alive	11.33	0
TCGA-D8-A1Y2-01A	TCGA-D8-A1Y2-01A	10.9	N0	1	Alive	14.22	0
TCGA-BH-A0BW-01A	TCGA-BH-A0BW-01A	10.91	N0	1	Alive	77.89	0
TCGA-BH-A0BO-01A	TCGA-BH-A0BO-01A	10.94	N0	1	Alive	72.17	0
TCGA-A8-A0AB-01A	TCGA-A8-A0AB-01A	10.97	N0	1	Alive	17.02	0
TCGA-C8-A26Y-01A	TCGA-C8-A26Y-01A	10.97	N0	1	Alive	12.94	0
TCGA-E2-A15P-01A	TCGA-E2-A15P-01A	10.98	N0	1	Alive	19.55	0
TCGA-OL-A5D8-01A	TCGA-OL-A5D8-01A	10.98	N0	1	Alive	31.96	0
TCGA-A7-A5ZV-01A	TCGA-A7-A5ZV-01A	11	N0	1	Alive	12.09	0
TCGA-AQ-A54N-01A	TCGA-AQ-A54N-01A	11	N0	1	Alive	2.56	0
TCGA-BH-A6R9-01A	TCGA-BH-A6R9-01A	11.01	N0	1	Alive	5.26	0
TCGA-A8-A095-01A	TCGA-A8-A095-01A	11.07	N0	1	Alive	41.95	0
TCGA-E9-A1QZ-01A	TCGA-E9-A1QZ-01A	11.08	N0	1	Alive	24.8	0
TCGA-A8-A08I-01A	TCGA-A8-A08I-01A	11.09	N0	1	Alive	11.99	0
TCGA-C8-A9FZ-01A	TCGA-C8-A9FZ-01A		N1	2	Alive	19.45	0
TCGA-A8-A08G-01A	TCGA-A8-A08G-01A	11.14	N0	1	Alive	19.94	0
TCGA-E2-A15C-01A	TCGA-E2-A15C-01A	11.14	N0	1	Alive	22.8	0
TCGA-LL-A73Y-01A	TCGA-LL-A73Y-01A	11.16	N0	1	Alive	15.67	0
TCGA-A2-A3XZ-01A	TCGA-A2-A3XZ-01A	11.17	N0	1	Alive	50.33	0
TCGA-E2-A150-01A	TCGA-E2-A150-01A	11.17	N0	1	Alive	63.57	0
TCGA-AC-A2FB-01A	TCGA-AC-A2FB-01A	11.18	N0	1	Alive	40.54	0
TCGA-A1-A0SF-01A	TCGA-A1-A0SF-01A	11.2	N0	1	Alive	48.06	0
TCGA-AR-A1AP-01A	TCGA-AR-A1AP-01A	11.21	N0	1	Alive	93.82	0
TCGA-C8-A1HM-01A	TCGA-C8-A1HM-01A	11.23	N0	1	Alive	12.32	0
TCGA-BH-A0B0-01A	TCGA-BH-A0B0-01A	11.24	N0	1	Alive	81.37	0
TCGA-JL-A3YX-01A	TCGA-JL-A3YX-01A	11.24	N0	1	Alive	11.56	0
TCGA-BH-A0DX-01A	TCGA-BH-A0DX-01A	11.26	N0	1	Alive	70.83	0
TCGA-AR-A24N-01A	TCGA-AR-A24N-01A	11.28	N0	1	Alive	99.7	0
TCGA-D8-A1XF-01A	TCGA-D8-A1XF-01A	11.32	N0	1	Alive	15.21	0
TCGA-BH-A0H3-01A	TCGA-BH-A0H3-01A	11.33	N0	1	Alive	63.34	0
TCGA-AR-A1AX-01A	TCGA-AR-A1AX-01A	11.37	N0	1	Alive	86.37	0
TCGA-E2-A1B5-01A	TCGA-E2-A1B5-01A	11.37	N0	1	Alive	32.33	0
TCGA-PL-A8LV-01A	TCGA-PL-A8LV-01A	11.37	N0	1	Alive	-0.23	0
TCGA-S3-AA10-01A	TCGA-S3-AA10-01A	11.38	N0	1	Alive	19.25	0
TCGA-E9-A245-01A	TCGA-E9-A245-01A	11.14	N1	2	Dead		1
TCGA-A2-A4RX-01A	TCGA-A2-A4RX-01A	11.42	N0	1	Alive	24.38	0
TCGA-A7-A6VX-01A	TCGA-A7-A6VX-01A	11.42	N0	1	Alive	10.41	0
TCGA-GI-A2C9-01A	TCGA-GI-A2C9-01A	11.49	N0	1	Alive	109.79	0
TCGA-BH-A0BG-01A	TCGA-BH-A0BG-01A	11.56	N0	1	Alive	61.47	0
TCGA-E2-A14U-01A	TCGA-E2-A14U-01A	11.56	N0	1	Alive	43.3	0
TCGA-E9-A1N8-01A	TCGA-E9-A1N8-01A	11.59	N0	1	Alive	34.13	0
TCGA-BH-A8FZ-01A	TCGA-BH-A8FZ-01A	11.66	N0	1	Alive	18.86	0
TCGA-LD-A9QF-01A	TCGA-LD-A9QF-01A	11.67	N0	1	Alive	10.61	0
TCGA-AN-A0AJ-01A	TCGA-AN-A0AJ-01A	11.7	N0	1	Alive	9.95	0
TCGA-BH-A42U-01A	TCGA-BH-A42U-01A	11.7	N0	1	Alive	110.51	0
TCGA-BH-A1FD-01A	TCGA-BH-A1FD-01A	11.77	N0	1	Dead	33.15	1
TCGA-OL-A6VQ-01A	TCGA-OL-A6VQ-01A	11.77	N0	1	Alive	19.71	0
TCGA-AR-A24P-01A	TCGA-AR-A24P-01A	11.78	N0	1	Alive	2.76	0
TCGA-D8-A1JL-01A	TCGA-D8-A1JL-01A	11.81	N0	1	Alive	20.07	0
TCGA-AR-A2LN-01A	TCGA-AR-A2LN-01A	11.85	N0	1	Alive	38.14	0
TCGA-C8-A3M8-01A	TCGA-C8-A3M8-01A	11.85	N0	1	Alive	12.94	0
TCGA-OL-A5RX-01A	TCGA-OL-A5RX-01A	11.86	N0	1	Alive	28.84	0
TCGA-LL-A5YO-01A	TCGA-LL-A5YO-01A	11.89	N0	1	Alive	14.45	0
TCGA-BH-A0B6-01A	TCGA-BH-A0B6-01A	11.92	N0	1	Alive	81.57	0
TCGA-E9-A22A-01A	TCGA-E9-A22A-01A	11.92	N0	1	Alive	39.06	0
TCGA-E2-A1LH-01A	TCGA-E2-A1LH-01A	11.93	N0	1	Alive	106.67	0
TCGA-PL-A8LY-01A	TCGA-PL-A8LY-01A	11.93	N0	1	Alive	0.26	0
TCGA-BH-A0DL-01A	TCGA-BH-A0DL-01A	11.96	N0	1	Alive	78.22	0
TCGA-A2-A0CO-01A	TCGA-A2-A0CO-01A	11.98	N0	1	Dead	114.72	1
TCGA-AC-A2QJ-01A	TCGA-AC-A2QJ-01A	12.02	N0	1	Dead	14.65	1
TCGA-BH-A209-01A	TCGA-BH-A209-01A	12.04	N0	1	Dead	130.06	1
TCGA-LL-A441-01A	TCGA-LL-A441-01A	12.1	N0	1	Alive	32.72	0
TCGA-EW-A6SB-01A	TCGA-EW-A6SB-01A	12.13	N0	1	Alive	24.97	0
TCGA-E9-A1RB-01A	TCGA-E9-A1RB-01A	12.19	N0	1	Dead	32.06	1
TCGA-A7-A6VW-01A	TCGA-A7-A6VW-01A	12.21	N0	1	Alive	9.36	0
TCGA-E2-A1BD-01A	TCGA-E2-A1BD-01A	12.25	N0	1	Alive	37.22	0
TCGA-E9-A1RA-01A	TCGA-E9-A1RA-01A	12.31	N0	1	Alive	44.97	0
TCGA-AR-A1AQ-01A	TCGA-AR-A1AQ-01A	12.36	N0	1	Alive	99.24	0
TCGA-A2-A0CR-01A	TCGA-A2-A0CR-01A	12.5	N0	1	Alive	107.85	0
TCGA-E9-A5FL-01A	TCGA-E9-A5FL-01A	12.57	N0	1	Alive	0.79	0
TCGA-AR-A1AW-01A	TCGA-AR-A1AW-01A	12.58	N0	1	Alive	86.47	0
TCGA-E2-A15F-01A	TCGA-E2-A15F-01A	12.61	N0	1	Alive	21.62	0
TCGA-AR-A1AY-01A	TCGA-AR-A1AY-01A	12.7	N0	1	Alive	33.71	0
TCGA-A8-A08H-01A	TCGA-A8-A08H-01A	12.78	N0	1	Alive	0	0
TCGA-BH-A0BQ-01A	TCGA-BH-A0BQ-01A	12.81	N0	1	Alive	74.08	0
TCGA-C8-A12V-01A	TCGA-C8-A12V-01A	12.83	N0	1	Alive	12.65	0
TCGA-A8-A07O-01A	TCGA-A8-A07O-01A	12.85	N0	1	Alive	9.99	0
TCGA-E2-A15I-01A	TCGA-E2-A15I-01A	12.91	N0	1	Alive	55.58	0
TCGA-OL-A66J-01A	TCGA-OL-A66J-01A	12.95	N0	1	Alive	65.57	0
TCGA-E9-A1NI-01A	TCGA-E9-A1NI-01A	13.11	N0	1	Alive	9.86	0
TCGA-AR-A1AJ-01A	TCGA-AR-A1AJ-01A	13.16	N0	1	Alive	100.92	0
TCGA-A7-A26F-01B	TCGA-A7-A26F-01B	13.24	N0	1	Alive	24.24	0
TCGA-EW-A1IY-01A	TCGA-EW-A1IY-01A	13.26	N0	1	Alive	8.48	0
TCGA-A8-A081-01A	TCGA-A8-A081-01A	13.4	N0	1	Alive	0	0
TCGA-C8-A134-01A	TCGA-C8-A134-01A	13.4	N0	1	Alive	12.58	0
TCGA-A7-A4SD-01A	TCGA-A7-A4SD-01A	13.55	N0	1	Alive	14.49	0
TCGA-5L-AAT1-01A	TCGA-5L-AAT1-01A	13.57	N0	1	Alive	48.32	0
TCGA-E2-A15D-01A	TCGA-E2-A15D-01A	13.69	N0	1	Alive	17.28	0
TCGA-OL-A97C-01A	TCGA-OL-A97C-01A	13.73	N0	1	Alive	8.9	0
TCGA-E2-A154-01A	TCGA-E2-A154-01A	13.78	N0	1	Alive	19.42	0
TCGA-BH-A1EY-01A	TCGA-BH-A1EY-01A	13.93	N0	1	Dead	17.67	1
TCGA-E9-A22G-01A	TCGA-E9-A22G-01A	13.93	N0	1	Alive	40.7	0
TCGA-A7-A13G-01B	TCGA-A7-A13G-01B	13.95	N0	1	Alive	23.59	0
TCGA-A7-A26I-01B	TCGA-A7-A26I-01B	14.01	N0	1	Alive	21.71	0
TCGA-S3-A6ZF-01A	TCGA-S3-A6ZF-01A	14.37	N0	1	Alive	18.79	0
TCGA-BH-A18T-01A	TCGA-BH-A18T-01A	14.73	N0	1	Dead	7.36	1
TCGA-E2-A1B6-01A	TCGA-E2-A1B6-01A	14.83	N0	1	Alive	28.48	0
TCGA-AR-A1AI-01A	TCGA-AR-A1AI-01A	14.93	N0	1	Alive	108.28	0
TCGA-OL-A5D7-01A	TCGA-OL-A5D7-01A	15.73	N0	1	Alive	58.48	0
TCGA-AR-A0U4-01A	TCGA-AR-A0U4-01A	15.76	N0	1	Alive	107.13	0
TCGA-E2-A1II-01A	TCGA-E2-A1II-01A	16.83	N0	1	Alive	33.67	0
TCGA-A2-A0SX-01A	TCGA-A2-A0SX-01A	10.22	N0 (i-)	1	Alive	50.39	0
TCGA-A7-A0CG-01A	TCGA-A7-A0CG-01A	10.32	N0 (i-)	1	Alive	34.26	0
TCGA-B6-A0IM-01A	TCGA-B6-A0IM-01A	10.38	N0 (i-)	1	Dead	127.23	1
TCGA-GM-A2D9-01A	TCGA-GM-A2D9-01A	10.46	N0 (i-)	1	Dead	59.53	1
TCGA-C8-A12O-01A	TCGA-C8-A12O-01A	10.48	N0 (i-)	1	Alive	12.65	0
TCGA-AO-A124-01A	TCGA-AO-A124-01A	10.49	N0 (i-)	1	Alive	115.18	0
TCGA-B6-A0RQ-01A	TCGA-B6-A0RQ-01A	10.5	N0 (i-)	1	Dead	140.18	1
TCGA-A2-A04V-01A	TCGA-A2-A04V-01A	10.52	N0 (i-)	1	Dead	63.07	1
TCGA-EW-A1J6-01A	TCGA-EW-A1J6-01A	10.52	N0 (i-)	1	Alive	28.75	0
TCGA-C8-A12N-01A	TCGA-C8-A12N-01A	10.56	N0 (i-)	1	Alive	11.76	0
TCGA-A2-A0T6-01A	TCGA-A2-A0T6-01A	10.63	N0 (i-)	1	Alive	18.89	0
TCGA-GM-A2DD-01A	TCGA-GM-A2DD-01A	10.63	N0 (i-)	1	Alive	74.97	0
TCGA-EW-A1P4-01A	TCGA-EW-A1P4-01A	10.65	N0 (i-)	1	Alive	29.8	0
TCGA-BH-A0W4-01A	TCGA-BH-A0W4-01A	10.7	N0 (i-)	1	Alive	24.93	0
TCGA-EW-A1PC-01B	TCGA-EW-A1PC-01B	10.72	N0 (i-)	1	Alive	6.14	0
TCGA-A7-A0CJ-01A	TCGA-A7-A0CJ-01A	10.73	N0 (i-)	1	Alive	30.58	0
TCGA-A2-A0EU-01A	TCGA-A2-A0EU-01A	10.74	N0 (i-)	1	Alive	34.26	0
TCGA-AQ-A04L-01B	TCGA-AQ-A04L-01B	10.79	N0 (i-)	1	Alive	129.99	0
TCGA-AC-A8OP-01A	TCGA-AC-A8OP-01A	10.83	N0 (i-)	1	Alive	20.17	0
TCGA-A2-A25A-01A	TCGA-A2-A25A-01A	10.87	N0 (i-)	1	Alive	107.62	0
TCGA-AO-A03M-01B	TCGA-AO-A03M-01B	10.88	N0 (i-)	1	Alive	61.3	0
TCGA-A2-A0D3-01A	TCGA-A2-A0D3-01A	10.9	N0 (i-)	1	Alive	61.53	0
TCGA-BH-A0HA-01A	TCGA-BH-A0HA-01A	10.9	N0 (i-)	1	Alive	52.92	0
TCGA-BH-A0HB-01A	TCGA-BH-A0HB-01A	10.9	N0 (i-)	1	Alive	26.48	0
TCGA-BH-A0HW-01A	TCGA-BH-A0HW-01A	10.9	N0 (i-)	1	Alive	51.28	0
TCGA-EW-A1J5-01A	TCGA-EW-A1J5-01A	10.9	N0 (i-)	1	Alive	15.67	0
TCGA-A7-A0CE-01A	TCGA-A7-A0CE-01A	11	N0 (i-)	1	Alive	35.28	0
TCGA-AO-A0J4-01A	TCGA-AO-A0J4-01A	11.06	N0 (i-)	1	Alive	52.14	0
TCGA-A2-A0CQ-01A	TCGA-A2-A0CQ-01A	11.2	N0 (i-)	1	Alive	88.53	0
TCGA-AC-A8OS-01A	TCGA-AC-A8OS-01A	11.2	N0 (i-)	1	Alive	2.3	0
TCGA-BH-A0DK-01A	TCGA-BH-A0DK-01A	11.27	N0 (i-)	1	Alive	13.9	0
TCGA-A2-A0CZ-01A	TCGA-A2-A0CZ-01A	11.35	N0 (i-)	1	Alive	53.09	0
TCGA-A2-A259-01A	TCGA-A2-A259-01A	11.36	N0 (i-)	1	Alive	52.43	0
TCGA-BH-A0AY-01A	TCGA-BH-A0AY-01A	11.36	N0 (i-)	1	Alive	25.53	0
TCGA-LL-A440-01A	TCGA-LL-A440-01A	11.44	N0 (i-)	1	Alive	24.93	0
TCGA-BH-A0E6-01A	TCGA-BH-A0E6-01A	11.46	N0 (i-)	1	Alive	9.63	0
TCGA-BH-A0RX-01A	TCGA-BH-A0RX-01A	11.47	N0 (i-)	1	Alive	5.58	0
TCGA-GM-A3NW-01A	TCGA-GM-A3NW-01A	11.52	N0 (i-)	1	Alive	110.41	0
TCGA-B6-A0RH-01A	TCGA-B6-A0RH-01A	11.6	N0 (i-)	1	Dead	212.09	1
TCGA-E9-A3HO-01A	TCGA-E9-A3HO-01A	11.68	N0 (i-)	1	Alive	38.04	0
TCGA-A2-A04N-01A	TCGA-A2-A04N-01A	11.74	N0 (i-)	1	Alive	143.04	0
TCGA-BH-A0HF-01A	TCGA-BH-A0HF-01A	11.76	N0 (i-)	1	Alive	23.88	0
TCGA-E9-A243-01A	TCGA-E9-A243-01A	11.77	N0 (i-)	1	Alive	20.11	0
TCGA-A2-A0D1-01A	TCGA-A2-A0D1-01A	11.82	N0 (i-)	1	Alive	34.53	0
TCGA-A7-A0DB-01A	TCGA-A7-A0DB-01A	11.83	N0 (i-)	1	Alive	33.08	0
TCGA-GM-A2DN-01A	TCGA-GM-A2DN-01A	11.88	N0 (i-)	1	Alive	101.54	0
TCGA-A2-A0ES-01A	TCGA-A2-A0ES-01A	11.89	N0 (i-)	1	Alive	71.94	0
TCGA-GM-A2DB-01A	TCGA-GM-A2DB-01A	12.17	N0 (i-)	1	Alive	79.04	0
TCGA-E9-A295-01A	TCGA-E9-A295-01A	12.2	N0 (i-)	1	Alive	12.32	0
TCGA-BH-A0H5-01A	TCGA-BH-A0H5-01A	12.21	N0 (i-)	1	Alive	53.22	0
TCGA-A1-A0SK-01A	TCGA-A1-A0SK-01A	12.23	N0 (i-)	1	Dead	31.77	1
TCGA-A2-A0T5-01A	TCGA-A2-A0T5-01A	12.3	N0 (i-)	1	Alive	17.44	0
TCGA-GM-A3XL-01A	TCGA-GM-A3XL-01A	12.32	N0 (i-)	1	Alive	69.25	0
TCGA-A2-A04Q-01A	TCGA-A2-A04Q-01A	12.4	N0 (i-)	1	Alive	78.35	0
TCGA-B6-A0RL-01A	TCGA-B6-A0RL-01A	12.49	N0 (i-)	1	Dead	81.11	1
TCGA-E2-A105-01A	TCGA-E2-A105-01A	12.6	N0 (i-)	1	Alive	42.97	0
TCGA-A7-A0DC-01A	TCGA-A7-A0DC-01A	12.69	N0 (i-)	1	Alive	29.76	0
TCGA-A2-A0YK-01A	TCGA-A2-A0YK-01A	12.73	N0 (i-)	1	Alive	19.32	0
TCGA-BH-A0DP-01A	TCGA-BH-A0DP-01A	12.76	N0 (i-)	1	Alive	15.64	0
TCGA-LL-A5YN-01A	TCGA-LL-A5YN-01A	12.83	N0 (i-)	1	Alive	14.68	0
TCGA-E9-A249-01A	TCGA-E9-A249-01A	13.07	N0 (i-)	1	Alive	7.13	0
TCGA-A7-A0D9-01A	TCGA-A7-A0D9-01A	13.09	N0 (i-)	1	Alive	37.42	0
TCGA-E9-A2JT-01A	TCGA-E9-A2JT-01A	13.1	N0 (i-)	1	Alive	9.46	0
TCGA-A2-A25F-01A	TCGA-A2-A25F-01A	13.19	N0 (i-)	1	Alive	10.58	0
TCGA-A2-A04T-01A	TCGA-A2-A04T-01A	13.24	N0 (i-)	1	Alive	73.78	0
TCGA-EW-A1P7-01A	TCGA-EW-A1P7-01A	13.29	N0 (i-)	1	Alive	30.06	0
TCGA-B6-A40B-01A	TCGA-B6-A40B-01A	13.3	N0 (i-)	1	Alive	103.55	0
TCGA-A2-A0CM-01A	TCGA-A2-A0CM-01A	13.31	N0 (i-)	1	Dead	24.77	1
TCGA-B6-A0IJ-01A	TCGA-B6-A0IJ-01A	13.43	N0 (i-)	1	Alive	233.44	0
TCGA-AC-A3QQ-01B	TCGA-AC-A3QQ-01B	13.45	N0 (i-)	1	Alive	24.11	0
TCGA-AO-A0J6-01A	TCGA-AO-A0J6-01A	13.47	N0 (i-)	1	Alive	37.45	0
TCGA-E9-A3QA-01A	TCGA-E9-A3QA-01A	13.47	N0 (i-)	1	Alive	30.16	0
TCGA-GM-A2DO-01A	TCGA-GM-A2DO-01A	13.48	N0 (i-)	1	Alive	85.28	0
TCGA-AC-A6IW-01A	TCGA-AC-A6IW-01A	13.54	N0 (i-)	1	Alive	13.57	0
TCGA-B6-A0RE-01A	TCGA-B6-A0RE-01A	13.72	N0 (i-)	1	Alive	255.49	0
TCGA-E9-A54X-01A	TCGA-E9-A54X-01A	13.73	N0 (i-)	1	Alive	23.88	0
TCGA-BH-A0W7-01A	TCGA-BH-A0W7-01A	13.77	N0 (i-)	1	Alive	44.78	0
TCGA-A2-A0EQ-01A	TCGA-A2-A0EQ-01A	13.79	N0 (i-)	1	Alive	79.7	0
TCGA-AO-A0JC-01A	TCGA-AO-A0JC-01A	14.08	N0 (i-)	1	Alive	50.82	0
TCGA-AO-A128-01A	TCGA-AO-A128-01A	14.48	N0 (i-)	1	Alive	106.7	0
TCGA-A1-A0SP-01A	TCGA-A1-A0SP-01A	15.03	N0 (i-)	1	Alive	19.19	0
TCGA-B6-A0I2-01A	TCGA-B6-A0I2-01A	15.1	N0 (i-)	1	Alive	143.27	0
TCGA-BH-A2L8-01A	TCGA-BH-A2L8-01A	15.24	N0 (i-)	1	Alive	20.11	0
TCGA-BH-A0B9-01A	TCGA-BH-A0B9-01A	15.4	N0 (i-)	1	Alive	51.64	0
TCGA-A2-A0YM-01A	TCGA-A2-A0YM-01A	15.48	N0 (i-)	1	Alive	31.7	0
TCGA-3C-AALK-01A	TCGA-3C-AALK-01A	10.43	N0 (i+)	1	Alive	47.57	0
TCGA-S3-AA14-01A	TCGA-S3-AA14-01A	10.45	N0 (i+)	1	Alive	17.38	0
TCGA-EW-A6SA-01A	TCGA-EW-A6SA-01A	10.72	N0 (i+)	1	Alive	16.75	0
TCGA-A2-A0YF-01A	TCGA-A2-A0YF-01A	10.87	N0 (i+)	1	Alive	50.43	0
TCGA-AO-A1KO-01A	TCGA-AO-A1KO-01A	10.95	N0 (i+)	1	Alive	20.43	0
TCGA-GM-A2DH-01A	TCGA-GM-A2DH-01A	11.08	N0 (i+)	1	Alive	72.04	0
TCGA-A2-A0CU-01A	TCGA-A2-A0CU-01A	11.14	N0 (i+)	1	Dead	5.19	1
TCGA-A2-A0D2-01A	TCGA-A2-A0D2-01A	11.16	N0 (i+)	1	Alive	33.74	0
TCGA-A2-A0EN-01A	TCGA-A2-A0EN-01A	11.18	N0 (i+)	1	Alive	134.3	0
TCGA-AO-A12A-01A	TCGA-AO-A12A-01A	11.3	N0 (i+)	1	Alive	102.23	0
TCGA-AO-A0J8-01A	TCGA-AO-A0J8-01A	11.36	N0 (i+)	1	Alive	22.34	0
TCGA-A2-A0T7-01A	TCGA-A2-A0T7-01A	11.37	N0 (i+)	1	Alive	20.73	0
TCGA-A2-A1FV-01A	TCGA-A2-A1FV-01A	11.37	N0 (i+)	1	Alive	23.46	0
TCGA-A7-A3IZ-01A	TCGA-A7-A3IZ-01A	11.43	N0 (i+)	1	Alive	10.58	0
TCGA-BH-A0HQ-01A	TCGA-BH-A0HQ-01A	11.76	N0 (i+)	1	Alive	36.83	0
TCGA-AQ-A04J-01A	TCGA-AQ-A04J-01A	11.88	N0 (i+)	1	Alive	26.91	0
TCGA-A2-A04U-01A	TCGA-A2-A04U-01A	12.27	N0 (i+)	1	Alive	87.19	0
TCGA-GM-A2DI-01A	TCGA-GM-A2DI-01A	12.5	N0 (i+)	1	Alive	85.09	0
TCGA-A2-A0EP-01A	TCGA-A2-A0EP-01A	12.96	N0 (i+)	1	Alive	118.36	0
TCGA-E2-A1IU-01A	TCGA-E2-A1IU-01A	10.39	N0 (mol+)	1	Alive	11.07	0
TCGA-A8-A097-01A	TCGA-A8-A097-01A	10.32	N1	2	Alive	11.99	0
TCGA-AR-A24U-01A	TCGA-AR-A24U-01A	10.32	N1	2	Alive	102.76	0
TCGA-OL-A5RW-01A	TCGA-OL-A5RW-01A	10.34	N1	2	Alive	36.33	0
TCGA-E2-A14N-01A	TCGA-E2-A14N-01A	10.35	N1	2	Alive	47.11	0
TCGA-A2-A0SY-01A	TCGA-A2-A0SY-01A	10.41	N1	2	Alive	44.25	0
TCGA-E2-A1LI-01A	TCGA-E2-A1LI-01A	10.43	N1	2	Alive	102.53	0
TCGA-E2-A15S-01A	TCGA-E2-A15S-01A	10.52	N1	2	Alive	14.06	0
TCGA-E9-A1NC-01A	TCGA-E9-A1NC-01A	10.52	N1	2	Alive	39.52	0
TCGA-BH-A1EO-01A	TCGA-BH-A1EO-01A	10.53	N1	2	Dead	91.92	1
TCGA-C8-A12W-01A	TCGA-C8-A12W-01A	10.53	N1	2	Alive	12.65	0
TCGA-E9-A1R0-01A	TCGA-E9-A1R0-01A	10.53	N1	2	Alive	28.25	0
TCGA-E9-A1N5-01A	TCGA-E9-A1N5-01A	10.65	N1	2	Alive	36.79	0
TCGA-AC-A2FO-01A	TCGA-AC-A2FO-01A	10.66	N1	2	Alive	74.08	0
TCGA-AR-A0TS-01A	TCGA-AR-A0TS-01A	10.7	N1	2	Alive	84.03	0
TCGA-B6-A0IK-01A	TCGA-B6-A0IK-01A	10.7	N1	2	Dead	18.76	1
TCGA-MS-A51U-01A	TCGA-MS-A51U-01A	10.7	N1	2	Alive	22.37	0
TCGA-C8-A26W-01A	TCGA-C8-A26W-01A	10.71	N1	2	Alive	12.52	0
TCGA-E9-A1N6-01A	TCGA-E9-A1N6-01A	10.73	N1	2	Dead	22.27	1
TCGA-BH-A1FE-01A	TCGA-BH-A1FE-01A	10.75	N1	2	Dead	74.67	1
TCGA-C8-A273-01A	TCGA-C8-A273-01A	10.77	N1	2	Alive	16.85	0
TCGA-AR-A2LO-01A	TCGA-AR-A2LO-01A	10.8	N1	2	Alive	39.36	0
TCGA-AR-A2LJ-01A	TCGA-AR-A2LJ-01A	10.9	N1	2	Alive	86.47	0
TCGA-A8-A09K-01A	TCGA-A8-A09K-01A	10.93	N1	2	Alive	29.96	0
TCGA-AR-A1AM-01A	TCGA-AR-A1AM-01A	10.95	N1	2	Alive	98.26	0
TCGA-D8-A141-01A	TCGA-D8-A141-01A	10.98	N1	2	Alive	20.57	0
TCGA-E9-A227-01A	TCGA-E9-A227-01A	11.01	N1	2	Alive	32.03	0
TCGA-E2-A1IE-01A	TCGA-E2-A1IE-01A	11.09	N1	2	Alive	77.6	0
TCGA-C8-A132-01A	TCGA-C8-A132-01A	11.16	N1	2	Alive	12.58	0
TCGA-AR-A1AL-01A	TCGA-AR-A1AL-01A	11.24	N1	2	Alive	97.6	0
TCGA-AC-A23G-01A	TCGA-AC-A23G-01A	11.29	N1	2	Alive	73.85	0
TCGA-AR-A0TX-01A	TCGA-AR-A0TX-01A	11.3	N1	2	Alive	64.78	0
TCGA-AR-A5QP-01A	TCGA-AR-A5QP-01A	11.31	N1	2	Alive	38.93	0
TCGA-OL-A5RU-01A	TCGA-OL-A5RU-01A	11.32	N1	2	Alive	40.05	0
TCGA-E9-A2JS-01A	TCGA-E9-A2JS-01A	11.34	N1	2	Dead	29.7	1
TCGA-AR-A2LM-01A	TCGA-AR-A2LM-01A	11.47	N1	2	Alive	63.57	0
TCGA-AO-A1KT-01A	TCGA-AO-A1KT-01A	11.51	N1	2	Alive	17.77	0
TCGA-E2-A1B1-01A	TCGA-E2-A1B1-01A	11.64	N1	2	Alive	87.16	0
TCGA-A7-A13E-01A	TCGA-A7-A13E-01A	11.73	N1	2	Dead	20.17	1
TCGA-E9-A228-01A	TCGA-E9-A228-01A	11.76	N1	2	Alive	42.21	0
TCGA-AO-A1KQ-01A	TCGA-AO-A1KQ-01A	11.83	N1	2	Alive	61.83	0
TCGA-BH-A0HK-01A	TCGA-BH-A0HK-01A	11.85	N1	2	Alive	5.85	0
TCGA-B6-A1KC-01B	TCGA-B6-A1KC-01B	11.94	N1	2	Alive	43.56	0
TCGA-AO-A0JI-01A	TCGA-AO-A0JI-01A	12.04	N1	2	Alive	50.2	0
TCGA-AO-A1KP-01A	TCGA-AO-A1KP-01A	12.06	N1	2	Alive	97.01	0
TCGA-S3-A6ZG-01A	TCGA-S3-A6ZG-01A	12.21	N1	2	Alive	18.46	0
TCGA-B6-A0RT-01A	TCGA-B6-A0RT-01A	12.22	N1	2	Alive	89.39	0
TCGA-AO-A0J7-01A	TCGA-AO-A0J7-01A	12.23	N1	2	Alive	20.3	0
TCGA-B6-A1KN-01A	TCGA-B6-A1KN-01A	12.27	N1	2	Alive	139.06	0
TCGA-B6-A0WT-01A	TCGA-B6-A0WT-01A	12.43	N1	2	Alive	188.53	0
TCGA-AR-A0U3-01A	TCGA-AR-A0U3-01A	12.44	N1	2	Alive	134.03	0
TCGA-OL-A5RY-01A	TCGA-OL-A5RY-01A	12.49	N1	2	Alive	24.7	0
TCGA-B6-A3ZX-01A	TCGA-B6-A3ZX-01A	12.69	N1	2	Dead	37.84	1
TCGA-C8-A12X-01A	TCGA-C8-A12X-01A	12.99	N1	2	Alive	12.65	0
TCGA-C8-A27A-01A	TCGA-C8-A27A-01A	13.23	N1	2	Alive	24.54	0
TCGA-A2-A1G1-01A	TCGA-A2-A1G1-01A	13.62	N1	2	Alive	19.19	0
TCGA-AC-A5EI-01A	TCGA-AC-A5EI-01A		N1mi	2	Alive	14.52	0
TCGA-BH-A0GY-01A	TCGA-BH-A0GY-01A	13.62	N1	2	Alive	30.32	0
TCGA-AR-A1AO-01A	TCGA-AR-A1AO-01A	13.69	N1	2	Alive	86.01	0
TCGA-AR-A5QQ-01A	TCGA-AR-A5QQ-01A	13.71	N1	2	Dead	10.58	1
TCGA-C8-A12K-01A	TCGA-C8-A12K-01A	14.26	N1	2	Alive	0	0
TCGA-B6-A0X1-01A	TCGA-B6-A0X1-01A	14.7	N1	2	Dead	244.91	1
TCGA-C8-A133-01A	TCGA-C8-A133-01A	15.22	N1	2	Alive	0	0
TCGA-E2-A14O-01A	TCGA-E2-A14O-01A	10.21	N1a	2	Alive	44.65	0
TCGA-BH-A0B3-01A	TCGA-BH-A0B3-01A	10.22	N1a	2	Alive	39.52	0
TCGA-BH-A0B1-01A	TCGA-BH-A0B1-01A	10.26	N1a	2	Alive	37.71	0
TCGA-BH-AB28-01A	TCGA-BH-AB28-01A	10.26	N1a	2	Alive	9.43	0
TCGA-A8-A06T-01A	TCGA-A8-A06T-01A	10.27	N1a	2	Alive	53.02	0
TCGA-A7-A13F-01A	TCGA-A7-A13F-01A	10.28	N1a	2	Alive	25.13	0
TCGA-BH-A0BD-01A	TCGA-BH-A0BD-01A	10.28	N1a	2	Alive	18.2	0
TCGA-OL-A66O-01A	TCGA-OL-A66O-01A	10.34	N1a	2	Alive	17.35	0
TCGA-AO-A0JD-01A	TCGA-AO-A0JD-01A	10.41	N1a	2	Alive	71.94	0
TCGA-A8-A07G-01A	TCGA-A8-A07G-01A	10.43	N1a	2	Alive	18.96	0
TCGA-BH-A0E9-01B	TCGA-BH-A0E9-01B	10.44	N1a	2	Alive	81.77	0
TCGA-A2-A1G0-01A	TCGA-A2-A1G0-01A	10.46	N1a	2	Alive	20.24	0
TCGA-E2-A153-01A	TCGA-E2-A153-01A	10.46	N1a	2	Alive	23.23	0
TCGA-OL-A66H-01A	TCGA-OL-A66H-01A	8.459	N1mi	2	Alive		0
TCGA-AC-A2QI-01A	TCGA-AC-A2QI-01A	10.47	N1a	2	Alive	19.32	0
TCGA-A7-A26E-01A	TCGA-A7-A26E-01A	10.48	N1a	2	Alive	31.34	0
TCGA-GM-A3XG-01A	TCGA-GM-A3XG-01A	10.5	N1a	2	Alive	43.69	0
TCGA-A8-A0A7-01A	TCGA-A8-A0A7-01A	10.55	N1a	2	Alive	0.99	0
TCGA-A8-A084-01A	TCGA-A8-A084-01A	10.56	N1a	2	Alive	15.05	0
TCGA-BH-A0EA-01A	TCGA-BH-A0EA-01A	10.59	N1a	2	Dead	32.56	1
TCGA-D8-A1JB-01A	TCGA-D8-A1JB-01A	10.6	N1a	2	Alive	55.45	0
TCGA-AO-A0JB-01A	TCGA-AO-A0JB-01A	10.62	N1a	2	Alive	50.66	0
TCGA-AO-A0JJ-01A	TCGA-AO-A0JJ-01A	10.64	N1a	2	Alive	61.99	0
TCGA-BH-A0GZ-01A	TCGA-BH-A0GZ-01A	10.73	N1a	2	Alive	10.78	0
TCGA-GM-A2DC-01A	TCGA-GM-A2DC-01A	10.75	N1a	2	Alive	83.28	0
TCGA-OL-A5S0-01A	TCGA-OL-A5S0-01A	10.8	N1a	2	Alive	20.37	0
TCGA-GM-A5PV-01A	TCGA-GM-A5PV-01A	10.81	N1a	2	Alive	13.53	0
TCGA-OK-A5Q2-01A	TCGA-OK-A5Q2-01A	10.84	N1a	2	Alive	2.1	0
TCGA-A2-A3XY-01A	TCGA-A2-A3XY-01A	10.91	N1a	2	Dead	35.91	1
TCGA-EW-A1IX-01A	TCGA-EW-A1IX-01A	10.94	N1a	2	Alive	39.68	0
TCGA-A2-A1G4-01A	TCGA-A2-A1G4-01A	10.95	N1a	2	Alive	19.55	0
TCGA-BH-A0W3-01A	TCGA-BH-A0W3-01A	10.95	N1a	2	Alive	23.92	0
TCGA-D8-A1XK-01A	TCGA-D8-A1XK-01A	10.96	N1a	2	Alive	14.49	0
TCGA-AC-A8OQ-01A	TCGA-AC-A8OQ-01A	10.98	N1a	2	Alive	1.12	0
TCGA-A7-A5ZW-01A	TCGA-A7-A5ZW-01A	10.99	N1a	2	Alive	10.71	0
TCGA-GM-A3NY-01A	TCGA-GM-A3NY-01A	11.01	N1a	2	Alive	38.17	0
TCGA-3C-AALI-01A	TCGA-3C-AALI-01A	11.04	N1a	2	Alive	131.57	0
TCGA-BH-A0DT-01A	TCGA-BH-A0DT-01A	11.11	N1a	2	Alive	78.94	0
TCGA-E2-A10C-01A	TCGA-E2-A10C-01A	11.11	N1a	2	Alive	40.08	0
TCGA-A7-A4SA-01A	TCGA-A7-A4SA-01A	11.13	N1a	2	Alive	14.91	0
TCGA-A8-A086-01A	TCGA-A8-A086-01A	11.21	N1a	2	Alive	13.01	0
TCGA-A2-A0EY-01A	TCGA-A2-A0EY-01A	11.26	N1a	2	Alive	63.24	0
TCGA-BH-A0C0-01A	TCGA-BH-A0C0-01A	11.27	N1a	2	Alive	41.72	0
TCGA-EW-A1PH-01A	TCGA-EW-A1PH-01A	11.33	N1a	2	Alive	19.94	0
TCGA-D8-A1XB-01A	TCGA-D8-A1XB-01A	11.35	N1a	2	Alive	18.13	0
TCGA-AC-A2FG-01A	TCGA-AC-A2FG-01A	11.36	N1a	2	Alive	60.87	0
TCGA-S3-AA12-01A	TCGA-S3-AA12-01A	11.37	N1a	2	Alive	18.86	0
TCGA-GM-A2DF-01A	TCGA-GM-A2DF-01A	11.41	N1a	2	Alive	70.8	0
TCGA-LD-A7W6-01A	TCGA-LD-A7W6-01A	11.45	N1a	2	Alive	13.27	0
TCGA-BH-A8G0-01A	TCGA-BH-A8G0-01A	11.46	N1a	2	Alive	21.75	0
TCGA-EW-A1PA-01A	TCGA-EW-A1PA-01A	11.47	N1a	2	Alive	18.89	0
TCGA-D8-A27K-01A	TCGA-D8-A27K-01A	11.51	N1a	2	Alive	48	0
TCGA-LL-A7T0-01A	TCGA-LL-A7T0-01A	11.52	N1a	2	Alive	12.35	0
TCGA-D8-A1JI-01A	TCGA-D8-A1JI-01A	11.53	N1a	2	Alive	18.96	0
TCGA-BH-A0B7-01A	TCGA-BH-A0B7-01A	11.57	N1a	2	Alive	84.07	0
TCGA-A7-A13H-01A	TCGA-A7-A13H-01A	11.6	N1a	2	Alive	29.53	0
TCGA-Z7-A8R5-01A	TCGA-Z7-A8R5-01A	11.6	N1a	2	Alive	107.98	0
TCGA-LL-A7SZ-01A	TCGA-LL-A7SZ-01A	11.62	N1a	2	Alive	19.51	0
TCGA-BH-A28Q-01A	TCGA-BH-A28Q-01A	11.64	N1a	2	Alive	36.76	0
TCGA-D8-A145-01A	TCGA-D8-A145-01A	11.64	N1a	2	Alive	13.47	0
TCGA-AO-A03R-01A	TCGA-AO-A03R-01A	11.67	N1a	2	Alive	68.69	0
TCGA-A8-A07L-01A	TCGA-A8-A07L-01A	11.68	N1a	2	Alive	32.03	0
TCGA-BH-A5IZ-01A	TCGA-BH-A5IZ-01A	11.72	N1a	2	Alive	18.63	0
TCGA-S3-AA0Z-01A	TCGA-S3-AA0Z-01A	11.72	N1a	2	Alive	20.66	0
TCGA-AO-A03T-01A	TCGA-AO-A03T-01A	11.73	N1a	2	Alive	69.78	0
TCGA-BH-A0EI-01A	TCGA-BH-A0EI-01A	11.81	N1a	2	Alive	63.27	0
TCGA-B6-A401-01A	TCGA-B6-A401-01A	11.83	N1a	2	Alive	85.28	0
TCGA-A8-A08T-01A	TCGA-A8-A08T-01A	11.91	N1a	2	Dead	111.99	1
TCGA-EW-A1P6-01A	TCGA-EW-A1P6-01A	11.92	N1a	2	Alive	18.46	0
TCGA-AO-A129-01A	TCGA-AO-A129-01A	11.97	N1a	2	Alive	107.95	0
TCGA-A2-A3XT-01A	TCGA-A2-A3XT-01A	12.12	N1a	2	Alive	91	0
TCGA-BH-A1ES-01A	TCGA-BH-A1ES-01A	12.13	N1a	2	Dead	113.73	1
TCGA-3C-AALJ-01A	TCGA-3C-AALJ-01A	12.36	N1a	2	Alive	48.42	0
TCGA-A1-A0SG-01A	TCGA-A1-A0SG-01A	12.43	N1a	2	Alive	14.26	0
TCGA-AC-A7VB-01A	TCGA-AC-A7VB-01A	12.47	N1a	2	Alive	8.21	0
TCGA-A8-A082-01A	TCGA-A8-A082-01A	12.51	N1a	2	Alive	18.04	0
TCGA-E2-A15R-01A	TCGA-E2-A15R-01A	12.52	N1a	2	Alive	56.9	0
TCGA-AC-A2BM-01A	TCGA-AC-A2BM-01A	12.55	N1a	2	Alive	99.28	0
TCGA-BH-A0DI-01A	TCGA-BH-A0DI-01A	12.64	N1a	2	Alive	29.96	0
TCGA-BH-A18I-01A	TCGA-BH-A18I-01A	12.64	N1a	2	Alive	35.91	0
TCGA-AC-A6NO-01A	TCGA-AC-A6NO-01A	12.65	N1a	2	Alive	1.68	0
TCGA-BH-A0DZ-11A	TCGA-BH-A0DZ-11A	12.66	N1a	2	Alive	16.26	0
TCGA-BH-A0W5-01A	TCGA-BH-A0W5-01A	12.73	N1a	2	Alive	42.31	0
TCGA-E2-A56Z-01A	TCGA-E2-A56Z-01A	12.74	N1a	2	Alive	8.28	0
TCGA-EW-A1IW-01A	TCGA-EW-A1IW-01A	12.78	N1a	2	Alive	12.19	0
TCGA-A2-A0CV-01A	TCGA-A2-A0CV-01A	13.1	N1a	2	Alive	98.92	0
TCGA-A2-A3Y0-01A	TCGA-A2-A3Y0-01A	13.25	N1a	2	Alive	50.79	0
TCGA-A2-A0ST-01A	TCGA-A2-A0ST-01A	13.31	N1a	2	Alive	99.11	0
TCGA-S3-AA15-01A	TCGA-S3-AA15-01A	13.32	N1a	2	Alive	17.25	0
TCGA-EW-A1PB-01A	TCGA-EW-A1PB-01A	13.39	N1a	2	Alive	19.97	0
TCGA-E2-A1AZ-01A	TCGA-E2-A1AZ-01A	13.46	N1a	2	Alive	76.51	0
TCGA-AO-A03N-01B	TCGA-AO-A03N-01B	14	N1a	2	Alive	66.72	0
TCGA-B6-A0RO-01A	TCGA-B6-A0RO-01A	14.29	N1a	2	Alive	161.93	0
TCGA-D8-A1JM-01A	TCGA-D8-A1JM-01A	14.8	N1a	2	Alive	19.38	0
TCGA-A2-A3XW-01A	TCGA-A2-A3XW-01A	15.2	N1a	2	Alive	56.24	0
TCGA-B6-A0IH-01A	TCGA-B6-A0IH-01A	10.27	N1b	2	Dead	112.29	1
TCGA-B6-A0IQ-01A	TCGA-B6-A0IQ-01A	10.34	N1b	2	Alive	140.77	0
TCGA-BH-A1EW-01A	TCGA-BH-A1EW-01A	10.34	N1b	2	Dead	55.65	1
TCGA-B6-A0WW-01A	TCGA-B6-A0WW-01A	10.6	N1b	2	Dead	18.33	1
TCGA-B6-A0IG-01A	TCGA-B6-A0IG-01A	10.68	N1b	2	Dead	146.39	1
TCGA-B6-A0WY-01A	TCGA-B6-A0WY-01A	10.88	N1b	2	Dead	113.7	1
TCGA-B6-A0WX-01A	TCGA-B6-A0WX-01A	10.95	N1b	2	Dead	20.99	1
TCGA-BH-A204-01A	TCGA-BH-A204-01A	10.96	N1b	2	Dead	83.25	1
TCGA-BH-A18Q-01A	TCGA-BH-A18Q-01A	10.97	N1b	2	Dead	55.58	1
TCGA-BH-A1EV-01A	TCGA-BH-A1EV-01A	11.14	N1b	2	Dead	11.99	1
TCGA-BH-A1FB-01A	TCGA-BH-A1FB-01A	11.16	N1b	2	Dead	120.53	1
TCGA-BH-A1FC-01A	TCGA-BH-A1FC-01A	11.5	N1b	2	Dead	114.06	1
TCGA-BH-A203-01A	TCGA-BH-A203-01A	11.92	N1b	2	Dead	38.57	1
TCGA-AO-A0J3-01A	TCGA-AO-A0J3-01A	12.08	N1b	2	Alive	21.39	0
TCGA-B6-A0I5-01A	TCGA-B6-A0I5-01A	13.22	N1b	2	Alive	281.08	0
TCGA-BH-A1F0-01A	TCGA-BH-A1F0-01A	11.59	N1c	2	Dead	25.79	1
TCGA-BH-A0BS-11A	TCGA-BH-A0BS-11A	11.97	N1c	2	Alive	85.81	0
TCGA-EW-A1OV-01A	TCGA-EW-A1OV-01A	10.31	N1mi	2	Alive	25.92	0
TCGA-AC-A3QP-01A	TCGA-AC-A3QP-01A	10.34	N1mi	2	Alive	22.17	0
TCGA-E2-A1IK-01A	TCGA-E2-A1IK-01A	10.47	N1mi	2	Alive	59.13	0
TCGA-E2-A1IG-01A	TCGA-E2-A1IG-01A	10.48	N1mi	2	Alive	70.3	0
TCGA-AC-A3TM-01A	TCGA-AC-A3TM-01A	10.49	N1mi	2	Alive	25.03	0
TCGA-A2-A0ER-01A	TCGA-A2-A0ER-01A	10.65	N1mi	2	Alive	74.34	0
TCGA-E2-A1L6-01A	TCGA-E2-A1L6-01A	10.66	N1mi	2	Alive	54.14	0
TCGA-AC-A2FM-01A	TCGA-AC-A2FM-01A	10.67	N1mi	2	Dead	26.02	1
TCGA-BH-A0BF-01A	TCGA-BH-A0BF-01A	10.87	N1mi	2	Dead	43.5	1
TCGA-BH-A42V-01A	TCGA-BH-A42V-01A	11.29	N1mi	2	Alive	20.86	0
TCGA-S3-AA17-01A	TCGA-S3-AA17-01A	11.32	N1mi	2	Alive	13.93	0
TCGA-A2-A0T3-01A	TCGA-A2-A0T3-01A	11.33	N1mi	2	Alive	49.8	0
TCGA-LD-A66U-01A	TCGA-LD-A66U-01A	11.37	N1mi	2	Alive	21.22	0
TCGA-AC-A3OD-01B	TCGA-AC-A3OD-01B	12.12	N1mi	2	Alive	14.82	0
TCGA-WT-AB41-01A	TCGA-WT-AB41-01A	13.13	N1mi	2	Alive	52.92	0
TCGA-E2-A570-01A	TCGA-E2-A570-01A	13.55	N1mi	2	Alive	30.58	0
TCGA-E2-A158-01A	TCGA-E2-A158-01A	13.95	N1mi	2	Alive	14.78	0
TCGA-OL-A66I-01A	TCGA-OL-A66I-01A	15.97	N1mi	2	Alive	23.46	0
TCGA-E9-A1RE-01A	TCGA-E9-A1RE-01A	10.25	N2	3	Alive	46.62	0
TCGA-AR-A0TT-01A	TCGA-AR-A0TT-01A	10.28	N2	3	Alive	108.94	0
TCGA-AN-A0XO-01A	TCGA-AN-A0XO-01A	10.33	N2	3	Alive	12.32	0
TCGA-AR-A2LK-01A	TCGA-AR-A2LK-01A	10.35	N2	3	Dead	54.17	1
TCGA-C8-A8HP-01A	TCGA-C8-A8HP-01A	10.4	N2	3	Alive	13.01	0
TCGA-AR-A24R-01A	TCGA-AR-A24R-01A	10.48	N2	3	Alive	112.68	0
TCGA-E2-A1L7-01A	TCGA-E2-A1L7-01A	10.61	N2	3	Alive	60.32	0
TCGA-AN-A0XT-01A	TCGA-AN-A0XT-01A	10.73	N2	3	Alive	0.33	0
[truncated: 97 more rows]

[truncated: 9 more sheets: T-w.out TX-Overall-03-29-19, T-w.out TX-04-12-2019-Low 25%, T-w.out TX-04-12-2019-Hi 25%, T-OS-04-12-19-Low 50%, T-OS-04-12-19-Hi 50%, OS-<50 & >50%-03-25-19, OS-<25 & >25%-03-25-19, Xena+cbio-ocoportal combine, Xena]
